# Supplementary material for: A copper-mediated tandem reaction through isocyanide insertion into N–H bonds: efficient access to unsymmetrical tetrasubstituted ureas
Source: Royal Society of Chemistry journal article supplement (doi:10.1039/c3cc47590e), 2013-11-27
Supplement: c3cc47590e.pdf [file c3cc47590e.pdf]

# Copper-mediated Tandem Reaction through Isocyanides N-H Bond Insertion: Efficient Access to Unsymmetrical Tetrasubstituted Ureas

Xiaomei Huang,<sup>a</sup> Shuguang Xu,<sup>a</sup> Qitao Tan,<sup>a</sup> Mingchun Gao,<sup>a</sup> Minjie Li,<sup>a</sup> and Bin Xu<sup>\*a,b</sup>

<sup>a</sup>Department of Chemistry, College of Sciences, Shanghai University, Shanghai 200444, China

<sup>b</sup>State Key Laboratory of Organometallic Chemistry, Shanghai Institute of Organic Chemistry,  
Chinese Academy of Sciences, Shanghai 200032, China

Tel: (+86) 21-66132830; Fax: (+86) 21-66134594; E-mail: xubin@shu.edu.cn

## Supporting Information

### CONTENTS:

|                                                                    |     |
|--------------------------------------------------------------------|-----|
| 1. General information.....                                        | S2  |
| 2. Screening of the reaction conditions (Tables S1).....           | S3  |
| 3. Synthesis and characterization for starting materials.....      | S4  |
| 4. Synthesis of copper carboxylates.....                           | S10 |
| 5. Synthesis and characterization of ureas.....                    | S10 |
| 6. Mechanistic studies.....                                        | S21 |
| 7. X-ray crystallographic analysis of compounds 4e, 5g and 5m..... | S22 |
| 8. Reference.....                                                  | S24 |
| 9. Copies of NMR spectra for all compounds.....                    | S25 |

## 1. General Information

All reagents and metal catalysts were obtained from commercial sources without further purification, and commercially available solvents were purified before use. All new compounds were fully characterized. All melting points were taken on a WRS-1A or a WRS-1B Digital Melting Point Apparatus without correction. Infrared spectra were obtained using an AVATAR 370 FT-IR spectrometer.  $^1\text{H}$ ,  $^{13}\text{C}$ , and  $^{19}\text{F}$  NMR spectra were recorded with a Bruker AV-500 spectrometer operating at 500 MHz and 125 MHz, respectively, with chemical shift values being reported in ppm relative to chloroform ( $\delta = 7.26$  ppm), dimethyl sulfoxide ( $\delta = 2.50$  ppm), acetone ( $\delta = 2.05$  ppm) or TMS ( $\delta = 0.00$  ppm) for  $^1\text{H}$  NMR; chloroform ( $\delta = 77.16$  ppm), acetone ( $\delta = 29.84$  and  $206.26$  ppm) or dimethyl sulfoxide ( $\delta = 39.52$  ppm) for  $^{13}\text{C}$  NMR; and  $\text{C}_6\text{F}_6$  ( $\delta = -164.9$  ppm) for  $^{19}\text{F}$  NMR. Mass spectra and high resolution mass spectra were recorded with an Agilent 5975N using an Electron impact (EI) or Electrospray ionization (ESI) techniques. Elemental analyses were carried out on an Elementar Vario EL elemental analyzer. Silica gel plate GF254 were used for thin layer chromatography (TLC) and silica gel H or 300-400 mesh were used for flash column chromatography. Yields refer to chromatographically and spectroscopically pure compounds, unless otherwise indicated.

## 2. Screening of the Reaction Conditions

**Table S1.** Optimization of reaction conditions<sup>a</sup>

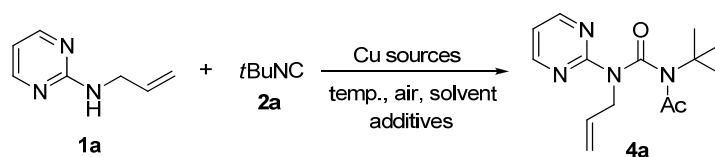

| Entry | Cu sources                             | Solvent | Time [h] | Temp. [°C] | Yield [%] <sup>b</sup> |
|-------|----------------------------------------|---------|----------|------------|------------------------|
| 1     | CuCl                                   | toluene | 36       | 110        | n.d.                   |
| 2     | Cu(OAc) <sub>2</sub>                   | toluene | 58       | 110        | 30 <sup>c</sup>        |
| 3     | Cu(OAc) <sub>2</sub>                   | toluene | 35       | 110        | 67                     |
| 4     | Cu(OAc) <sub>2</sub> ·H <sub>2</sub> O | toluene | 27       | 110        | 65                     |
| 5     | Cu(OAc) <sub>2</sub> ·H <sub>2</sub> O | toluene | 47       | 110        | 51 <sup>d</sup>        |
| 6     | Cu(OAc) <sub>2</sub> ·H <sub>2</sub> O | PhCl    | 24       | 110        | 32                     |
| 7     | Cu(OAc) <sub>2</sub> ·H <sub>2</sub> O | dioxane | 35       | 110        | trace                  |
| 8     | Cu(OAc) <sub>2</sub> ·H <sub>2</sub> O | DMF     | 35       | 110        | trace                  |
| 9     | Cu(OAc) <sub>2</sub> ·H <sub>2</sub> O | toluene | 59       | 100        | 59                     |
| 10    | Cu(OAc) <sub>2</sub> ·H <sub>2</sub> O | toluene | 36       | 120        | 48                     |
| 11    | Cu(OAc) <sub>2</sub> ·H <sub>2</sub> O | toluene | 24       | 110        | 19 <sup>e</sup>        |
| 12    | Cu(OAc) <sub>2</sub> ·H <sub>2</sub> O | toluene | 40       | 110        | 16 <sup>f</sup>        |
| 13    | Cu(OAc) <sub>2</sub> ·H <sub>2</sub> O | toluene | 39       | 110        | trace <sup>g</sup>     |
| 14    | --                                     | toluene | 24       | 110        | n.d.                   |
| 15    | --                                     | toluene | 12       | 110        | n.d. <sup>h</sup>      |

<sup>a</sup> Reaction conditions: **1a** (0.3 mmol), **2a** (0.9 mmol), Cu source (0.6 mmol), 110 °C, air, solvent (1.5 mL), dried through a calcium chloride tube. n.d. = not detected. <sup>b</sup> Isolated yield. <sup>c</sup> Cu(OAc)<sub>2</sub>·H<sub>2</sub>O (1.5 equiv). <sup>d</sup> Cu(OAc)<sub>2</sub>·H<sub>2</sub>O (2.5 equiv). <sup>e</sup> N<sub>2</sub>. <sup>f</sup> O<sub>2</sub>. <sup>g</sup> Cu(OAc)<sub>2</sub>·H<sub>2</sub>O (0.2 equiv), NaOAc (2.0 equiv). <sup>h</sup> Pd(OAc)<sub>2</sub> (5 mol %), NaOAc (3.0 equiv).

### 3. Synthesis and characterization for starting materials

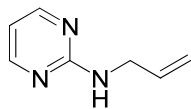

**Allyl-pyrimidin-2-yl-amine (1a)**<sup>[1]</sup>: To an oven-dried flask containing 2-chloro-pyrimidine (1.145 g, 10 mmol) was added allylamine (2.5 mL). The reaction mixture was stirred under reflux for 3 h and monitored by TLC. Upon completion, the mixture was washed with 10% NaOH aqueous solution and extracted with Et<sub>2</sub>O (3×30 mL). The combined organic phase was washed with brine and dried over Na<sub>2</sub>SO<sub>4</sub>. After that, the solid was filtered off through a thin pad of celite, and the filtrate was evaporated in vacuum to give the crude product which was purified by column chromatography on silica gel to give **1a** as yellow liquid (1.318 g, 97%). IR (KBr, cm<sup>-1</sup>): 3264, 1592, 1411, 1362, 919, 801; <sup>1</sup>H NMR (CDCl<sub>3</sub>, 500 MHz): δ 8.25 (d, *J* = 5.0 Hz, 2H), 6.50 (t, *J* = 5.0 Hz, 1H), 5.98-5.91 (m, 2H), 5.26-5.22 (m, 1H), 5.13-5.10 (m, 1H), 4.06-4.04 (m, 2H); <sup>13</sup>C NMR (CDCl<sub>3</sub>, 125 MHz): δ 162.1, 158.0, 134.9, 115.7, 110.5, 43.7; LC-MS (ESI) *m/z* 136.1 [M<sup>+</sup>H].

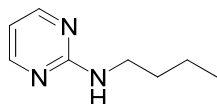

**Butyl-pyrimidin-2-yl-amine (1b)**<sup>[2]</sup>: To an oven-dried flask containing 2-chloro-pyrimidine (2.2 g, 19.2 mmol), butylamine (1.4 g, 19.2 mmol) and triethylamine (6.0 mL) were added in *n*-butanol (40 mL) and the mixture was stirred at 110 °C for 18 h and monitored by TLC. Upon completion, the reaction mixture was extracted with ethyl acetate (3×30 mL). The combined organic phase was washed with brine and dried over Na<sub>2</sub>SO<sub>4</sub>. After that, the solid was filtered off through a thin pad of celite, and the filtrate was evaporated in vacuum to give the crude product which was purified by column chromatography on silica gel to give **1b** as yellow liquid (2.3 g, 79%). IR (KBr, cm<sup>-1</sup>): 3444, 3275, 2871, 1592, 801, 640; <sup>1</sup>H NMR (CDCl<sub>3</sub>, 500 MHz): δ 8.26 (s, 2H), 6.51 (t, *J* = 5.0 Hz, 1H), 5.46 (s, 1H), 3.42-3.38 (m, 2H), 1.62-1.56 (m, 2H), 1.45-1.37 (m, 2H), 0.94 (t, *J* = 7.5 Hz, 3H); <sup>13</sup>C NMR (CDCl<sub>3</sub>, 125 MHz): δ 162.3, 157.9, 110.2, 41.2, 31.7, 20.1, 13.8; LC-MS (ESI) *m/z* 152.1 [M<sup>+</sup>H].

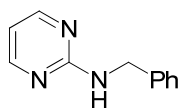

**Benzyl-pyrimidin-2-yl-amine (1c)**<sup>[2]</sup>: To an oven-dried flask containing 2-chloro-pyrimidine (230.0 mg, 2.0 mmol), benzylamine (107.0 mg, 1.0 mmol) and triethylamine (101.0 mg, 1.0 mmol) were added in ethanol (2 mL) and the mixture was stirred at 78 °C for 24 h and monitored by TLC. Upon completion, the reaction mixture was extracted with ethyl acetate (3×30 mL). The combined organic phase was washed with brine and dried over Na<sub>2</sub>SO<sub>4</sub>. After that, the solid was filtered off through a thin pad of celite, and the filtrate was evaporated in vacuum to give the crude product which was purified by column chromatography on silica gel to give **1c** as yellow solid (140.6 mg, 76%). M.p. 72-74 °C; IR (KBr, cm<sup>-1</sup>): 3241, 2874, 1592, 1261, 667, 537; <sup>1</sup>H NMR (CDCl<sub>3</sub>, 500 MHz): δ 8.28 (s, 2H), 7.37-7.32 (m, 4H), 7.29-7.26 (m, 1H), 6.58 (t, *J* = 5.0 Hz, 1H), 6.11 (s, 1H), 4.66 (d, *J* = 6.0 Hz, 2H); <sup>13</sup>C NMR (CDCl<sub>3</sub>, 125 MHz): δ 162.1, 158.0, 139.0, 128.6,

127.6, 127.3, 110.6, 45.5; LC-MS (ESI)  $m/z$  186.1 [ $M^+H$ ].

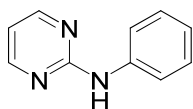

**Phenyl-pyrimidin-2-yl-amine (1d)**<sup>[3]</sup>: To an oven-dried flask containing aniline (6.975 g, 75 mmol), 2-chloro-pyrimidine (5.725 g, 50 mmol) and acetic acid (50 mL) in 1,4-dioxane (130 mL) was added. The reaction mixture was stirred at 110 °C for 23 h and monitored by TLC. Upon completion, the mixture was extracted with  $CH_2Cl_2$  ( $3 \times 100$  mL). The combined organic phase was washed with brine and dried over  $Na_2SO_4$ . After that, the solid was filtered off through a thin pad of celite, and the filtrate was evaporated in vacuum to give the crude product which was purified by column chromatography on silica gel and then recrystallization to give **1d** as white solid (7.006 g, 82%). M.p. 106-108 °C; IR (KBr,  $cm^{-1}$ ): 3441, 3258, 1613, 1252, 751, 640;  $^1H$  NMR ( $CDCl_3$ , 500 MHz):  $\delta$  8.43 (d,  $J = 4.8$  Hz, 2H), 7.71 (br, 1H), 7.62 (d, 2H), 7.35 (t,  $J = 8.2$  Hz, 2H), 7.07 (t,  $J = 7.4$  Hz, 1H), 6.73 (t,  $J = 4.8$  Hz, 1H);  $^{13}C$  NMR ( $CDCl_3$ , 125 MHz):  $\delta$  160.2, 158.0, 139.4, 129.0, 122.9, 119.8, 112.4; EI-MS  $m/z$  (%): 171 (46) [ $M^+$ ], 170 (100).

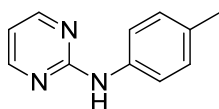

**Pyrimidin-2-yl-*p*-tolyl-amine (1e)**<sup>[4]</sup>: Following the same procedure as for **1d** with 4-methylaniline (321.0 mg, 3 mmol), 2-chloro-pyrimidine (520.0 mg, 4.5 mmol), and acetic acid (270 mg, 4.5 mmol) in 1,4-dioxane (6.0 mL) for 9 h to give **1e** as yellow solid (433.4 mg, 78%). M.p. 124-126 °C; IR (KBr,  $cm^{-1}$ ): 3443, 3259, 1617, 1252, 794, 640, 507;  $^1H$  NMR ( $CDCl_3$ , 500 MHz):  $\delta$  8.40 (d,  $J = 4.5$  Hz, 2H), 7.95 (s, 1H), 7.49 (d,  $J = 8.5$  Hz, 2H), 7.16 (d,  $J = 8.0$  Hz, 2H), 6.67 (t,  $J = 4.5$  Hz, 1H), 2.33 (s, 3H);  $^{13}C$  NMR ( $CDCl_3$ , 125 MHz):  $\delta$  160.4, 158.0, 136.7, 132.6, 129.5, 120.3, 112.1, 20.9; EI-MS  $m/z$  (%): 185 (58) [ $M^+$ ], 184 (100).

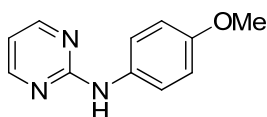

**(4-Methoxy-phenyl)-pyrimidin-2-yl-amine (1f)**<sup>[4]</sup>: Following the same procedure as for **1d** with 4-methoxyaniline (370.0 mg, 3.0 mmol), 2-chloro-pyrimidine (520.0 mg, 4.5 mmol), and acetic acid (270 mg, 1.5 mmol) in 1,4-dioxane (6.0 mL) for 18 h to give **1f** as orange-red solid (509.0 mg, 84%). M.p. 123-124 °C; IR (KBr,  $cm^{-1}$ ): 3442, 3258, 1617, 1424, 1243, 560;  $^1H$  NMR ( $CDCl_3$ , 500 MHz):  $\delta$  8.37 (d,  $J = 4.5$  Hz, 2H), 7.95 (br, 1H), 7.48 (d,  $J = 8.4$  Hz, 2H), 7.16 (d,  $J = 8.2$  Hz, 2H), 6.68 (t,  $J = 4.8$  Hz, 1H), 3.80 (s, 3H);  $^{13}C$  NMR ( $CDCl_3$ , 125 MHz):  $\delta$  160.6, 158.0, 155.9, 132.3, 122.4, 114.2, 111.9, 55.6; LC-MS (ESI)  $m/z$  202.1 [ $M^+H$ ].

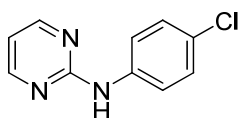

**(4-Chloro-phenyl)-pyrimidin-2-yl-amine (1g)**<sup>[4]</sup>: Following the same procedure as for **1d** with *p*-chloroaniline (765.4 mg, 6.0 mmol), 2-chloro-pyrimidine (572.5 mg, 5.0 mmol), and acetic acid (300.3 mg, 5.0 mmol) in 1,4-dioxane (12.0 mL) for 29 h to give **1g** as yellow solid (849.3 mg, 83%). M.p. 172-174 °C; IR (KBr,  $cm^{-1}$ ): 3455, 3259, 1616, 1424, 790, 464;  $^1H$  NMR ( $CDCl_3$ , 500

MHz):  $\delta$  8.43 (d,  $J$  = 4.8 Hz, 2H), 7.62 (br, 1H), 7.58 (d,  $J$  = 8.7 Hz, 2H), 7.30 (d,  $J$  = 8.7 Hz, 2H), 6.76 (t,  $J$  = 4.8 Hz, 1H);  $^{13}\text{C}$  NMR ( $\text{CDCl}_3$ , 125 MHz):  $\delta$  159.7, 158.0, 137.9, 128.9, 127.6, 120.7, 112.8; EI-MS  $m/z$  (%): 207 (18) [ $\text{M}^+$  ( $^{37}\text{Cl}$ )], 205 (58) [ $\text{M}^+$  ( $^{35}\text{Cl}$ )], 204 (100).

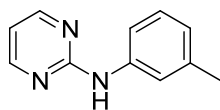

**Pyrimidin-2-yl-*m*-tolyl-amine (1h)**<sup>[4]</sup>: Following the same procedure as for **1d** with 3-methylaniline (385.7 mg, 3.6 mmol), 2-chloro-pyrimidine (343.5 mg, 3.0 mmol), and acetic acid (180.0 mg, 3.0 mmol) in 1,4-dioxane (7.2 mL) for 18 h to give **1h** as yellow solid (245.0 mg, 44%). M.p. 80-82 °C; IR (KBr,  $\text{cm}^{-1}$ ): 3314, 1614, 1254, 798, 519, 443;  $^1\text{H}$  NMR ( $\text{CDCl}_3$ , 500 MHz):  $\delta$  8.43 (d,  $J$  = 5.0 Hz, 2H), 7.49 (br, 1H), 7.44-7.42 (m, 2H), 7.23 (t,  $J$  = 8.0 Hz, 1H), 6.89 (d,  $J$  = 8.0 Hz, 1H), 6.72 (t,  $J$  = 5.0 Hz, 1H), 2.37 (s, 3H);  $^{13}\text{C}$  NMR ( $\text{CDCl}_3$ , 125 MHz):  $\delta$  160.3, 158.0, 139.3, 138.8, 128.8, 123.8, 120.4, 116.9, 112.3, 21.7; LC-MS (ESI)  $m/z$  186.1 [ $\text{M}^+\text{H}$ ].

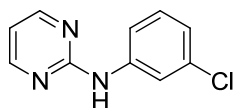

**(3-Chloro-phenyl)-pyrimidin-2-yl-amine (1i)**<sup>[4]</sup>: Following the same procedure as for **1d** with *m*-chloroaniline (765.0 mg, 6.0 mmol), 2-chloro-pyrimidine (572.5 mg, 5.0 mmol), and acetic acid (300.3 mg, 5.0 mmol) in 1,4-dioxane (12 mL) for 24 h to give **1i** as yellow solid (906.5 mg, 88%). M.p. 106-108 °C; IR (KBr,  $\text{cm}^{-1}$ ): 3445, 1617, 1432, 995, 793, 640;  $^1\text{H}$  NMR ( $\text{CDCl}_3$ , 500 MHz):  $\delta$  8.45 (d,  $J$  = 4.5 Hz, 2H), 7.86 (s, 1H), 7.73 (br, 1H), 7.39 (d,  $J$  = 8.0 Hz, 1H), 7.25 (t,  $J$  = 7.5 Hz, 1H), 7.02 (d,  $J$  = 8.0 Hz, 1H), 6.79 (t,  $J$  = 4.5 Hz, 1H);  $^{13}\text{C}$  NMR ( $\text{CDCl}_3$ , 125 MHz):  $\delta$  159.8, 158.0, 140.8, 134.6, 129.9, 122.5, 119.4, 117.4, 113.0; LC-MS (ESI)  $m/z$  208.1 [ $\text{M}^+\text{H}$  ( $^{37}\text{Cl}$ )], 206.1 [ $\text{M}^+\text{H}$  ( $^{35}\text{Cl}$ )].

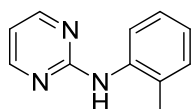

**Pyrimidin-2-yl-*o*-tolyl-amine (1j)**<sup>[3]</sup>: Following the same procedure as for **1d** with *o*-methylaniline (642.9 mg, 6.0 mmol), 2-chloro-pyrimidine (572.5 mg, 5.0 mmol), and acetic acid (300.3 mg, 5.0 mmol) in 1,4-dioxane (12 mL) for 25 h to give **1j** as white solid (493.3 mg, 53%). M.p. 88-90 °C; IR (KBr,  $\text{cm}^{-1}$ ): 3444, 3230, 1583, 1257, 752, 639;  $^1\text{H}$  NMR ( $\text{CDCl}_3$ , 500 MHz):  $\delta$  8.40 (d,  $J$  = 5.0 Hz, 2H), 7.89 (d,  $J$  = 8.0 Hz, 1H), 7.22-7.26 (m, 3H), 7.07 (t,  $J$  = 7.4 Hz, 1H), 6.72 (t,  $J$  = 5.0 Hz, 1H), 2.33 (s, 3H);  $^{13}\text{C}$  NMR ( $\text{CDCl}_3$ , 125 MHz):  $\delta$  160.6, 158.1, 137.1, 130.6, 129.8, 126.7, 124.3, 122.7, 122.2, 18.2; LC-MS (ESI)  $m/z$  186.1 [ $\text{M}^+\text{H}$ ].

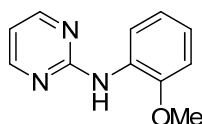

**(2-Methoxy-phenyl)-pyrimidin-2-yl-amine (1k)**<sup>[3]</sup>: Following the same procedure as for **1d** with *o*-methoxyaniline (738.9 mg, 6.0 mmol), 2-chloro-pyrimidine (572.5 mg, 5.0 mmol), and acetic acid (300.3 mg, 5.0 mmol) in 1,4-dioxane (12 mL) for 18 h to give **1k** as yellow solid (382.7 mg, 38%). M.p. 54-56 °C; IR (KBr,  $\text{cm}^{-1}$ ): 3385, 2998, 1581, 1245, 749, 583;  $^1\text{H}$  NMR ( $\text{CDCl}_3$ , 500 MHz):  $\delta$  8.42-8.45 (m, 3H), 8.05 (br, 1H), 7.00-7.01 (m, 2H), 6.90-6.92 (m, 1H), 6.73 (t,  $J$  = 5.0,

1H), 3.91 (s, 3H);  $^{13}\text{C}$  NMR ( $\text{CDCl}_3$ , 125 MHz):  $\delta$  159.9, 157.9, 148.0, 129.0, 122.0, 120.9, 118.9, 112.3, 110.0, 55.7; LC-MS (ESI)  $m/z$  202.1 [ $\text{M}^+\text{H}$ ].

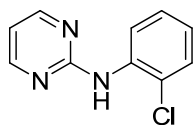

**(2-Chloro-phenyl)-pyrimidin-2-yl-amine (1l)**<sup>[4]</sup>: To an oven-dried flask containing 2-phenyl-pyrimidine (872.2 mg, 5.0 mmol), *N*-chlorosuccinimide (815.8 mg, 6.0 mg),  $\text{Pd}(\text{OAc})_2$  (59.9 mg, 0.25 mmol) were added in HOAc (50 mL). The reaction mixture was stirred at 110 °C for 17 h and monitored by TLC. Upon completion, the reaction mixture was extracted with ethyl acetate (3×30 mL). The combined organic phase was washed with brine and dried over  $\text{Na}_2\text{SO}_4$ . After that, the solid was filtered off through a thin pad of celite, and the filtrate was evaporated in vacuum to give the crude product which was purified by column chromatography on silica gel and then recrystallization to give **1l** as white solid (404.4 mg, 39%). M.p. 94-96 °C; IR (KBr,  $\text{cm}^{-1}$ ): 3445, 3226, 1596, 1289, 798, 600;  $^1\text{H}$  NMR ( $\text{CDCl}_3$ , 500 MHz):  $\delta$  8.47-8.46 (m, 3H), 7.85 (br, 1H), 7.40 (d,  $J = 7.0$  Hz, 1H), 7.30 (t,  $J = 8.0$  Hz, 1H), 7.00 (t,  $J = 5.0$  Hz, 1H), 6.81 (t,  $J = 5.0$  Hz, 1H);  $^{13}\text{C}$  NMR ( $\text{CDCl}_3$ , 125 MHz):  $\delta$  159.7, 158.0, 136.0, 129.2, 127.4, 122.9, 122.7, 120.5, 113.3; LC-MS (ESI)  $m/z$  208.1 [ $\text{M}^+\text{H}$  ( $^{37}\text{Cl}$ )], 206.1 [ $\text{M}^+\text{H}$  ( $^{35}\text{Cl}$ )].

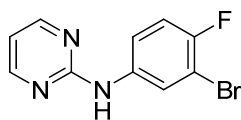

**(3-Bromo-4-fluoro-phenyl)-pyrimidin-2-yl-amine (1m)**: Following the same procedure as for **1d** with 3-bromo-4-fluoro-phenylamine (912.1 mg, 4.8 mmol), 2-chloro-pyrimidine (458.0 mg, 4.0 mmol), and acetic acid (24.2 mg, 4.0 mmol) in 1,4-dioxane (9.6 mL) for 23 h to give **1m** as white solid (701.9 mg, 65%). M.p. 156-158 °C; IR (KBr,  $\text{cm}^{-1}$ ): 3440, 3263, 1614, 1253, 798, 556  $\text{cm}^{-1}$ ;  $^1\text{H}$  NMR ( $\text{CDCl}_3$ , 500 MHz):  $\delta$  8.44 (d,  $J = 4.5$  Hz, 2H), 7.98 (dd,  $^4J_{\text{F-H}} = 6.0$  Hz,  $^4J_{\text{H-H}} = 2.5$  Hz, 1H), 7.74 (br, 1H), 7.45-7.42 (m, 1H), 7.08 (t,  $J = 8.5$  Hz, 1H), 6.78 (t,  $J = 5.0$ , 1H);  $^{19}\text{F}$  NMR ( $\text{CDCl}_3$ , 470 MHz):  $\delta$  -115.0 (m, Ar-F);  $^{13}\text{C}$  NMR ( $\text{CDCl}_3$ , 125 MHz):  $\delta$  159.5, 158.0, 155.0 (d,  $^1J_{\text{C-F}} = 237.5$  Hz), 136.2 (d,  $^4J_{\text{C-F}} = 3.8$  Hz), 124.4, 120.1 (d,  $^3J_{\text{C-F}} = 6.3$  Hz), 116.3 (d,  $^2J_{\text{C-F}} = 23.8$  Hz), 112.9, 108.9 (d,  $^2J_{\text{C-F}} = 21.3$  Hz); EI-MS  $m/z$  (%): 269 (62) [ $\text{M}^+$  ( $^{81}\text{Br}$ )], 267 (64) [ $\text{M}^+$  ( $^{79}\text{Br}$ )]; HRMS (EI) calcd for  $\text{C}_{10}\text{H}_6\text{BrFN}_3$  [ $\text{M-H}$ ] $^+$  265.9729, found 265.9728.

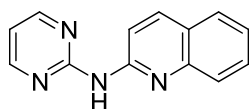

**Pyrimidin-2-yl-quinolin-2-yl-amine (1n)**<sup>[5]</sup>: To an oven-dried flask containing 2-chloroquinoline (589.0 mg, 3.6 mmol), 2-aminopyrimidine (285.3 mg, 3.0 mmol),  $\text{Pd}_2(\text{dba})_3$  (41.2 mg, 0.045 mmol), DPPF (49.9 mg, 0.09 mmol) and *t*-BuOK (403.9 mg, 3.6 mmol) were added in toluene (30 mL). The reaction mixture was stirred at 80 °C for 27 h and monitored by TLC. Upon completion, the mixture was extracted with ethyl acetate (3×30 mL). The combined organic phase was washed with brine and dried over  $\text{Na}_2\text{SO}_4$ . After that, the solid was filtered off through a thin pad of celite, and the filtrate was evaporated in vacuum to give the crude product which was purified by column chromatography on silica gel and then recrystallization to give **1n** as white solid (85 mg, 13%). M.p. 180-182 °C; IR (KBr,  $\text{cm}^{-1}$ ): 3444, 3038, 1610, 1503, 1449, 1427, 1334, 817, 737;  $^1\text{H}$  NMR ( $\text{CDCl}_3$ , 500 MHz):  $\delta$  9.48 (br, 1H), 8.69-8.67 (m, 3H), 8.14 (d,  $J = 9.0$  Hz, 1H), 7.87 (d,  $J = 8.0$

Hz, 1H), 7.75 (d,  $J = 8.0$  Hz, 1H), 7.64 (td,  $J = 7.5, 1.5$  Hz, 1H), 7.39 (td,  $J = 7.5, 0.5$  Hz, 1H), 6.88 (t,  $J = 4.5$  Hz, 1H);  $^{13}\text{C}$  NMR ( $\text{CDCl}_3$ , 125 MHz):  $\delta$  159.5, 158.2, 152.4, 138.0, 129.8, 127.5, 127.1, 125.4, 124.2, 114.1, 113.8; LC-MS (ESI)  $m/z$  223.1 [ $\text{M}^+\text{H}$ ].

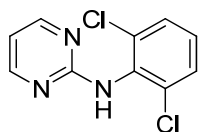

**(2,6-Dichloro-phenyl)-pyrimidin-2-yl-amine (1o)**<sup>[6]</sup>: Following the same procedure as for **1l** with 2-phenyl-pyrimidine (872.2 mg, 5.0 mmol), *N*-chlorosuccinimide (815.8 mg, 6.0 mg),  $\text{Pd}(\text{OAc})_2$  (59.9 mg, 0.25 mmol) in HOAc (50 mL) for 17 h to give **1o** as white solid (244.0 mg, 20%). M.p. 172-174 °C; IR (KBr,  $\text{cm}^{-1}$ ): 3453, 3063, 1589, 1519, 1445, 1413, 1250, 784;  $^1\text{H}$  NMR ( $\text{CDCl}_3$ , 500 MHz):  $\delta$  8.37 (d,  $J = 5.0$  Hz, 2H), 7.98 (br, 1H), 7.40 (d,  $J = 8.0$  Hz, 2H), 7.16 (t,  $J = 8.5$ , 1H), 6.71 (t,  $J = 4.5$  Hz, 1H);  $^{13}\text{C}$  NMR ( $\text{CDCl}_3$ , 125 MHz):  $\delta$  160.6, 158.2, 134.2, 133.9, 128.6, 127.8, 112.7; EI-MS  $m/z$  (%): 241 (1) [ $\text{M}^+$  ( $^{37}\text{Cl}$ ,  $^{35}\text{Cl}$ )], 239 (3) [ $\text{M}^+$  ( $2 \times ^{35}\text{Cl}$ )], 204 (100).

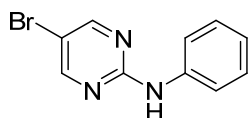

**(5-Bromo-pyrimidin-2-yl)-phenyl-amine (1p)**<sup>[7]</sup>: To an oven-dried flask containing 5-bromo-2-chloro-pyrimidine (580.2 mg, 3.0 mmol), aniline (279.6 mg, 3.0 mmol) in *n*-butanol (3 mL) were added. The reaction mixture was stirred at 110 °C for 21 h and monitored by TLC. Upon completion, the mixture was filtered through a thin pad of celite, and the residue was purified by recrystallization to give **1p** as yellow solid (418.2 mg, 56%). M.p. 122-124 °C; IR (KBr,  $\text{cm}^{-1}$ ): 3442, 3264, 1608, 1574, 1529, 1448, 1430, 753;  $^1\text{H}$  NMR ( $d_6$ -Acetone, 500 MHz):  $\delta$  8.89 (br, 1H), 8.53 (s, 2H), 7.81 (d,  $J = 7.5$  Hz, 2H), 7.34 (t,  $J = 8.0$  Hz, 2H), 7.03 (t,  $J = 7.5$  Hz, 1H);  $^{13}\text{C}$  NMR ( $d_6$ -Acetone, 125 MHz):  $\delta$  158.8, 158.1, 140.0, 128.6, 122.2, 119.2, 107.8; LC-MS (ESI)  $m/z$  252.0 [ $\text{M}^+\text{H}$  ( $^{81}\text{Br}$ )], 250.0 [ $\text{M}^+\text{H}$  ( $^{79}\text{Br}$ )].

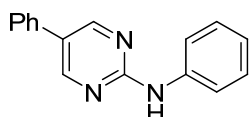

**Phenyl-(5-phenyl-pyrimidin-2-yl)-amine (1q)**<sup>[8]</sup>: Following the same procedure as for **1p** with 2-chloro-5-phenyl-pyrimidine (190.6 mg, 1.0 mmol) and aniline (186.4 mg, 2.0 mmol) in *n*-butanol (1.0 mL) for 18 h to give **1q** as white solid (137.3 mg, 56%). M.p. 166-168 °C; IR (KBr,  $\text{cm}^{-1}$ ): 3453, 3269, 3029, 1619, 1529, 1451, 756, 698;  $^1\text{H}$  NMR ( $\text{CDCl}_3$ , 500 MHz):  $\delta$  8.67 (s, 2H), 7.74 (br, 1H), 7.66 (d,  $J = 8.0$  Hz, 2H), 7.53-7.47 (m, 4H), 7.41-7.36 (m, 3H), 7.09 (t,  $J = 7.0$  Hz, 1H);  $^{13}\text{C}$  NMR ( $\text{CDCl}_3$ , 125 MHz):  $\delta$  158.8, 155.9, 139.0, 134.8, 129.3, 129.1, 127.9, 126.1, 125.7, 123.1, 119.7; EI-MS  $m/z$  (%): 247 (64) [ $\text{M}^+$ ], 246 (100).

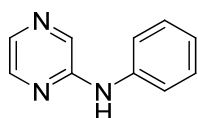

**Phenyl-pyrazin-2-yl-amine (1r)**<sup>[9]</sup>: Following the same procedure as for **1p** with 2-chloropyrazine (343.5 mg, 3.0 mmol) and aniline (279.6 mg, 3.0 mmol) in *n*-butanol (3.0 mL) for 52 h to give **1r** as yellow solid (245.4 mg, 48%). M.p. 130-132 °C; IR (KBr,  $\text{cm}^{-1}$ ): 3473, 3283,



3101, 1626, 1584, 1521, 1498, 1352, 752;  $^1\text{H}$  NMR ( $\text{CDCl}_3$ , 500 MHz):  $\delta$  8.25 (s, 1H), 8.10 (d,  $J = 1.5$  Hz, 1H), 7.96 (d,  $J = 3.0$  Hz, 1H), 7.43 (d,  $J = 8.5$  Hz, 2H), 7.35 (t,  $J = 8.0$  Hz, 2H), 7.10 (m, 2H);  $^{13}\text{C}$  NMR ( $\text{CDCl}_3$ , 125 MHz):  $\delta$  152.4, 141.9, 139.2, 134.7, 133.0, 129.4, 123.7, 120.4; EI-MS  $m/z$  (%): 171 (72) [ $\text{M}^+$ ], 170 (100).

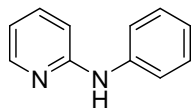

**Phenyl-pyridin-2-yl-amine (1s)**<sup>[3]</sup>: To an oven-dried flask containing 2-bromopyridine (4.74 g, 30.0 mmol), aniline (2.794 g, 3.0 mmol) was added. The reaction mixture was stirred at 160 °C for 7 h and monitored by TLC. Upon completion, saturate  $\text{NaHCO}_3$  was added, and the reaction mixture was extracted with ethyl acetate (3×30 mL). The combined organic phase was washed with brine and dried over  $\text{Na}_2\text{SO}_4$ . After that, the solid was filtered off through a thin pad of celite, and the filtrate was evaporated in vacuum to give the crude product which was purified by column chromatography on silica gel to give **1s** as white solid (4.954 g, 97%). M.p. 106-108 °C; IR (KBr,  $\text{cm}^{-1}$ ): 3450, 3224, 1590, 1574, 1464, 1444, 1327, 770, 670;  $^1\text{H}$  NMR ( $\text{CDCl}_3$ , 500 MHz):  $\delta$  8.17 (d,  $J = 4.0$  Hz, 1H), 7.51 (td,  $J = 5.5, 2.0$  Hz, 1H), 7.36-7.32 (m, 4H), 7.09-7.05 (m, 1H), 6.98 (s, 1H), 6.89 (d,  $J = 8.5$  Hz, 1H), 6.75-6.73 (m, 1H);  $^{13}\text{C}$  NMR ( $\text{CDCl}_3$ , 125 MHz):  $\delta$  156.1, 148.2, 140.5, 137.9, 129.3, 122.9, 120.5, 114.9, 108.2; LC-MS (ESI)  $m/z$  171.1 [ $\text{M}^+\text{H}$ ].

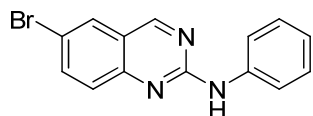

**(6-Bromoquinazolin-2-yl)-phenyl-amine (1t)**<sup>[10]</sup>: Following the same procedure as for **1d** with aniline (139.7 mg, 1.5 mmol), 2,6-dibromoquinazoline (287.9 mg, 1.0 mmol), and acetic acid (60.1 mg, 1.0 mmol) in 1,4-dioxane (3.0 mL) for 22 h to give **1t** as yellow solid (208.0 mg, 70%). M.p. 154-156 °C; IR (KBr,  $\text{cm}^{-1}$ ): 3442, 3279, 1601, 1583, 1543, 1446, 1353, 747;  $^1\text{H}$  NMR ( $\text{CDCl}_3$ , 500 MHz):  $\delta$  9.02 (s, 1H), 7.88 (d,  $J = 2.0$  Hz, 1H), 7.82-7.79 (m, 3H), 7.63 (d,  $J = 9.0$  Hz, 1H), 7.55 (br, 1H), 7.39 (t,  $J = 8.0$  Hz, 2H), 7.10 (t,  $J = 7.0$  Hz, 1H);  $^{13}\text{C}$  NMR ( $\text{CDCl}_3$ , 125 MHz):  $\delta$  160.9, 156.8, 150.1, 139.2, 137.7, 129.5, 129.0, 128.0, 123.0, 121.7, 119.3, 116.5; EI-MS  $m/z$  (%): 301 (1) [ $\text{M}^+$  ( $^{81}\text{Br}$ )], 299 (1) [ $\text{M}^+$  ( $^{79}\text{Br}$ )], 57 (100).

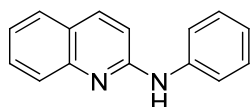

**Phenyl-quinolin-2-yl-amine (1u)**<sup>[9]</sup>: To an oven-dried flask containing 2-chloroquinoline (327.2 mg, 2.0 mmol), aniline (186.2 mg, 2.0 mmol) were added in ethanol (10 mL). The reaction mixture was stirred under reflux for 10 h and monitored by TLC. Upon completion, the reaction mixture was extracted with ethyl acetate (3×10 mL). The combined organic phase was washed with brine and dried over  $\text{Na}_2\text{SO}_4$ . After that, the solid was filtered off through a thin pad of celite, and the filtrate was evaporated in vacuum to give the crude product which was purified by column chromatography on silica gel to give **1u** as white solid (409.2 mg, 93%). M.p. 94-96 °C; IR (KBr,  $\text{cm}^{-1}$ ): 3404, 3050, 1620, 1597, 1533, 1401, 823, 752;  $^1\text{H}$  NMR ( $\text{CDCl}_3$ , 500 MHz):  $\delta$  7.95 (d,  $J = 9.0$  Hz, 1H), 7.79 (d,  $J = 8.5$  Hz, 1H), 7.65 (d,  $J = 8.0$  Hz, 1H), 7.61 (td,  $J = 8.0, 1.5$  Hz, 1H), 7.55 (dd,  $J = 8.5, 1.0$  Hz, 2H), 7.37 (t,  $J = 8.5$  Hz, 2H), 7.31 (td,  $J = 8.0, 1.0$  Hz, 1H), 7.12 (tt,  $J = 7.0, 1.5$  Hz, 1H), 7.00 (d,  $J = 9.0$  Hz, 1H), 2.50 (br, 1H);  $^{13}\text{C}$  NMR ( $\text{CDCl}_3$ , 125 MHz):  $\delta$  154.5, 147.6,

140.2, 137.8, 129.9, 129.3, 127.5, 126.7, 124.2, 123.2, 123.1, 120.6, 111.8; LC-MS (ESI)  $m/z$  221.0  $[M^+H]$ .

#### 4. Synthesis of copper carboxylates

**General procedure:** To a round-bottom flask, sodium carboxylates was dissolved in water, and aqueous  $CuSO_4$  was added. The reaction mixture was stirred at room temperature for 2 h. Upon completion, the reaction mixture filtered and washed with water and then dried in vacuum to give copper complex as copper (II) laurate monohydrate (**3b**),<sup>[11]</sup> copper (II) phenylacetate (**3c**),<sup>[12]</sup> copper (II) benzoate monohydrate (**3d**),<sup>[13]</sup> copper (II) crotonate monohydrate (**3f**),<sup>[14]</sup> and copper (II) phenylpropionate multihydrate (**3g**).<sup>[15]</sup>

**Copper (II) cinnamate monohydrate (3e)**<sup>[16]</sup>: To a round-bottom flask, A solution of  $CuCl_2 \cdot 2H_2O$  in ethanol was added to a solution of cinnamic acid and  $Et_3N$  were added in ethanol. The reaction mixture was stirred at room temperature for 2 h. Upon completion, the reaction mixture filtered and washed with water and then dried in vacuum to give copper (II) cinnamate monohydrate (**3e**).

#### 5. Synthesis and characterization of ureas

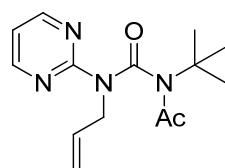

**1-Acetyl-3-allyl-1-tert-butyl-3-pyrimidin-2-yl-urea (4a):** To an oven-dried flask containing **1a** (67.6 mg, 0.5 mmol),  $Cu(OAc)_2 \cdot H_2O$  (199.7 mg, 1.0 mmol) and *tert*-butyl isocyanide (131.3 mg, 1.5 mmol) was added in toluene (3.0 mL). The reaction mixture was stirred at 110 °C for 36 h in the presence of air which was dried through a calcium chloride tube and monitored by TLC. Upon completion, the reaction mixture was washed with dilute ammonia and extracted with  $CH_2Cl_2$  ( $3 \times 10$  mL). The combined organic phase was washed with brine and dried over  $Na_2SO_4$ . After that, the solid was filtered off through a thin pad of celite, and the filtrate was evaporated in vacuum to give the crude product which was purified by column chromatography on silica gel to give **4a** as white solid (89.8 mg, 65%). M.p. 50-52 °C; IR (KBr,  $cm^{-1}$ ): 2979, 2964, 1675, 1568, 1415, 1315, 825;  $^1H$  NMR ( $CDCl_3$ , 500 MHz):  $\delta$  8.69 (d,  $J = 4.5$  Hz, 2H), 7.16 (t,  $J = 4.5$  Hz, 1H), 5.96-5.88 (m, 1H), 5.24 (dd,  $J = 17.0, 1.0$  Hz, 1H) 5.12 (dd,  $J = 10.0, 1.0$  Hz, 1H), 4.68 (m, 2H), 2.18 (s, 3H), 1.23 (s, 9H);  $^{13}C$  NMR ( $CDCl_3$ , 125 MHz):  $\delta$  169.9, 160.2, 158.3, 156.4, 132.0, 118.6, 118.4, 58.3, 50.8, 27.6, 25.3; LC-MS (ESI)  $m/z$  299.1  $[M^+Na]$ ; Anal. Calcd. For  $C_{14}H_{20}N_4O_2$ : C, 60.85; H, 7.30; N, 20.28. Found: C, 60.71; H, 7.29; N, 20.15.

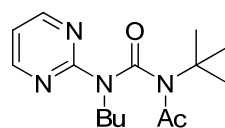

**1-Acetyl-3-butyl-1-tert-butyl-3-pyrimidin-2-yl-urea (4b):** Following the same procedure as for **4a** with **1b** (75.6 mg, 0.5 mmol),  $Cu(OAc)_2 \cdot H_2O$  (199.7 mg, 1.0 mmol), *tert*-butyl isocyanide (131.3 mg, 1.5 mmol) in toluene for 66 h to give **4b** as yellow liquid (97.6 mg, 67%). IR (KBr,

cm<sup>-1</sup>): 2961, 2933, 1693, 1670, 1565, 1417, 803; <sup>1</sup>H NMR (CDCl<sub>3</sub>, 500 MHz): δ 8.70 (d, *J* = 4.5 Hz, 2H), 7.16 (t, *J* = 5.0 Hz, 1H), 4.06-4.03 (m, 2H), 2.19 (s, 3H), 1.68-1.54 (m, 2H), 1.36-1.28 (m, 2H), 1.21 (s, 9H), 0.88 (t, *J* = 7.5 Hz, 3H); <sup>13</sup>C NMR (CDCl<sub>3</sub>, 125 MHz): δ 169.9, 160.5, 158.3, 156.4, 118.6, 58.0, 48.5, 29.7, 27.5, 25.3, 20.1, 13.7; LC-MS (ESI) *m/z* 293.1 [M<sup>+</sup>H]; HRMS (ESI) calcd for C<sub>15</sub>H<sub>24</sub>N<sub>4</sub>NaO<sub>2</sub> [M<sup>+</sup>Na] 315.1797, found 315.1778.

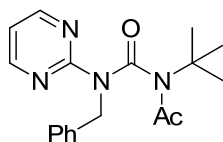

**1-Acetyl-3-benzyl-1-tert-butyl-3-pyrimidin-2-yl-urea (4c)**<sup>[17]</sup>: Following the same procedure as for **4a** with **1c** (92.6 mg, 0.5 mmol), Cu(OAc)<sub>2</sub>·H<sub>2</sub>O (199.7 mg, 1.0 mmol), *tert*-butyl isocyanide (131.3 mg, 1.5 mmol) in toluene for 19 h to give **4c** as white solid (105.2 mg, 65%). M.p. 46-48 °C; IR (KBr, cm<sup>-1</sup>): 2979, 2929, 1694, 1670, 1565, 1416, 1317, 700; <sup>1</sup>H NMR (CDCl<sub>3</sub>, 500 MHz): δ 8.66 (d, *J* = 5.0 Hz, 2H), 7.35-7.31 (m, 2H), 7.26-7.21 (m, 3H), 7.11 (t, *J* = 5.0 Hz, 1H), 5.37 (A of AB, *J* = 14.5 Hz, 1H), 5.26 (B of AB, *J* = 15.0 Hz, 1H), 2.16 (s, 3H), 1.24 (s, 9H); <sup>13</sup>C NMR (CDCl<sub>3</sub>, 125 MHz): δ 169.9, 160.1, 158.3, 156.9, 136.3, 128.5, 128.3, 127.6, 118.6, 58.4, 51.6, 27.6, 25.4; LC-MS (ESI) *m/z* 349.1 [M<sup>+</sup>Na]; Anal. Calcd. For C<sub>18</sub>H<sub>22</sub>N<sub>4</sub>O<sub>2</sub>: C, 66.24; H, 6.79; N, 17.17. Found: C, 66.20; H, 6.78; N, 17.28.

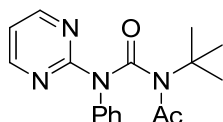

**1-Acetyl-1-tert-butyl-3-phenyl-3-pyrimidin-2-yl-urea (4d)**: Following the same procedure as for **4a** with **1d** (85.5 mg, 0.5 mmol), Cu(OAc)<sub>2</sub>·H<sub>2</sub>O (199.7 mg, 1.0 mmol), *tert*-butyl isocyanide (131.3 mg, 1.5 mmol) in toluene for 25 h to give **4d** as white solid (140.4 mg, 90%). M.p. 82-83 °C; IR (KBr, cm<sup>-1</sup>): 2979, 2923, 1704, 1668, 1566, 1512, 1413, 1297, 1021, 763, 734; <sup>1</sup>H NMR (CDCl<sub>3</sub>, 500 MHz): δ 8.73 (d, *J* = 5.0 Hz, 2H), 7.45-7.42 (m, 2H), 7.36-7.33 (m, 3H), 7.22 (t, *J* = 5.0 Hz, 1H), 2.39 (s, 3H), 1.33 (s, 9H); <sup>13</sup>C NMR (CDCl<sub>3</sub>, 125 MHz): δ 170.1, 160.8, 158.9, 156.2, 140.4, 129.5, 128.0, 127.0, 119.4, 58.8, 27.7, 25.6; EI-MS *m/z* (%): 312 (1) [M<sup>+</sup>], 170 (100); Anal. Calcd. For C<sub>17</sub>H<sub>20</sub>N<sub>4</sub>O<sub>2</sub>: C, 65.37; H, 6.45; N, 17.94. Found: C, 65.57; H, 6.47; N, 18.14.

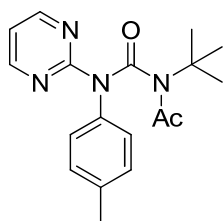

**1-Acetyl-1-tert-butyl-3-pyrimidin-2-yl-3-p-tolyl-urea (4e)**<sup>[17]</sup>: Following the same procedure as for **4a** with **1e** (92.6 mg, 0.5 mmol), Cu(OAc)<sub>2</sub>·H<sub>2</sub>O (199.7 mg, 1.0 mmol), *tert*-butyl isocyanide (131.3 mg, 1.5 mmol) in toluene for 27 h to give **4e** as yellow solid (156.8 mg, 96%). M.p. 110-111 °C; IR (KBr, cm<sup>-1</sup>): 3007, 2979, 2924, 1704, 1668, 1565, 1513, 1413, 1298, 763, 734; <sup>1</sup>H NMR (CDCl<sub>3</sub>, 500 MHz): δ 8.72 (d, *J* = 5.0 Hz, 2H), 7.23 (s, 4H), 7.20 (t, *J* = 5.0 Hz, 1H), 2.38 (s, 3H), 2.36 (s, 3H), 1.33 (s, 9H); <sup>13</sup>C NMR (CDCl<sub>3</sub>, 125 MHz): δ 170.1, 160.9, 158.8, 156.3, 138.0, 137.8, 130.0, 126.8, 119.2, 58.7, 27.7, 25.6, 21.2; EI-MS *m/z* (%): 326 (4) [M<sup>+</sup>], 184 (100); Anal.

Calcd. For  $C_{18}H_{22}N_4O_2$ : C, 66.24; H, 6.79; N, 17.17. Found: C, 66.36; H, 6.73; N, 17.27.

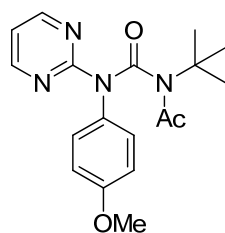

**1-Acetyl-1-tert-butyl-3-(4-methoxy-phenyl)-3-pyrimidin-2-yl-urea (4f)**<sup>[17]</sup>: Following the same procedure as for **4a** with **1f** (100.6 mg, 0.5 mmol),  $Cu(OAc)_2 \cdot H_2O$  (199.7 mg, 1.0 mmol), *tert*-butyl isocyanide (131.3 mg, 1.5 mmol) in toluene for 25 h to give **4f** as white solid (145.2 mg, 85%). M.p. 124-126 °C; IR (KBr,  $cm^{-1}$ ): 3010, 2977, 2933, 1699, 1672, 1565, 1510, 1411, 1295, 828;  $^1H$  NMR ( $CDCl_3$ , 500 MHz):  $\delta$  8.72 (d,  $J = 5.0$  Hz, 2H), 7.28 (AA' of AA'BB',  $J = 9.5$  Hz, 2H), 7.20 (t,  $J = 5.0$  Hz, 1H), 6.93 (BB' of AA'BB',  $J = 9.0$  Hz, 2H), 3.80 (s, 3H), 2.38 (s, 3H), 1.32 (s, 9H);  $^{13}C$  NMR ( $CDCl_3$ , 125 MHz):  $\delta$  170.1, 160.9, 159.0, 158.9, 156.4, 133.0, 128.3, 119.3, 114.7, 58.7, 55.5, 27.7, 25.6; LC-MS (ESI)  $m/z$  365.2 [ $M^+Na$ ]; Anal. Calcd. For  $C_{18}H_{22}N_4O_3$ : C, 63.14; H, 6.48; N, 16.36. Found: C, 63.26; H, 6.67; N, 16.23.

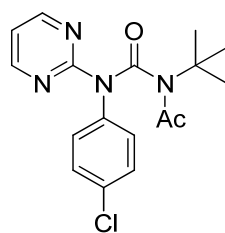

**1-Acetyl-1-tert-butyl-3-(4-chloro-phenyl)-3-pyrimidin-2-yl-urea (4g)**: Following the same procedure as for **4a** with **1g** (102.8 mg, 0.5 mmol),  $Cu(OAc)_2 \cdot H_2O$  (199.7 mg, 1.0 mmol), *tert*-butyl isocyanide (131.3 mg, 1.5 mmol) in toluene for 20 h to give **4g** as yellow solid (124.9 mg, 72%). M.p. 151-152 °C; IR (KBr,  $cm^{-1}$ ): 3007, 2979, 2922, 1705, 1673, 1566, 1490, 1416, 1309, 835;  $^1H$  NMR ( $CDCl_3$ , 500 MHz):  $\delta$  8.72 (d,  $J = 5.0$  Hz, 2H), 7.38 (AA' of AA'BB',  $J = 8.5$  Hz, 2H), 7.27 (BB' of AA'BB',  $J = 8.5$  Hz, 2H), 7.23 (t,  $J = 4.5$  Hz, 1H), 2.36 (s, 3H), 1.31 (s, 9H);  $^{13}C$  NMR ( $CDCl_3$ , 125 MHz):  $\delta$  170.0, 160.5, 159.0, 156.2, 138.8, 133.8, 129.6, 128.4, 119.6, 58.9, 27.7, 25.6; LC-MS (ESI)  $m/z$  371.1 [ $M^+Na$  ( $^{37}Cl$ )], 369.1 [ $M^+Na$  ( $^{35}Cl$ )]; Anal. Calcd. For  $C_{17}H_{19}ClN_4O_2$ : C, 58.87; H, 5.52; N, 16.15. Found: C, 58.84; H, 5.45; N, 15.85.

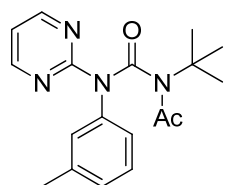

**1-Acetyl-1-tert-butyl-3-(3-methyl-phenyl)-3-pyrimidin-2-yl-urea (4h)**<sup>[17]</sup>: Following the same procedure as for **4a** with **1h** (92.6 mg, 0.5 mmol),  $Cu(OAc)_2 \cdot H_2O$  (199.7 mg, 1.0 mmol), *tert*-butyl isocyanide (131.3 mg, 1.5 mmol) in toluene for 22 h to give **4h** as white solid (142.3 mg, 87%). M.p. 76-78 °C; IR (KBr,  $cm^{-1}$ ): 3009, 2968, 2922, 1706, 1673, 1564, 1409, 727;  $^1H$  NMR ( $CDCl_3$ , 500 MHz):  $\delta$  8.73 (d,  $J = 5.0$  Hz, 2H), 7.31 (t,  $J = 7.5$  Hz, 1H), 7.21 (t,  $J = 5.0$  Hz, 1H), 7.16-7.12 (m, 3H), 2.39 (s, 3H), 2.36 (s, 3H), 1.33 (s, 9H);  $^{13}C$  NMR ( $CDCl_3$ , 125 MHz):  $\delta$  170.1, 160.9, 158.9, 156.2, 140.2, 139.5, 129.3, 128.9, 127.5, 124.0, 119.4, 58.8, 27.7, 25.6, 21.4; LC-MS (ESI)  $m/z$  349.1

[M<sup>+</sup>Na]; Anal. Calcd. For C<sub>18</sub>H<sub>22</sub>N<sub>4</sub>O<sub>2</sub>: C, 66.24; H, 6.79; N, 17.17. Found: C, 66.50; H, 6.88; N, 17.35.

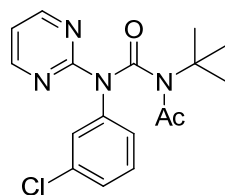

**1-Acetyl-1-tert-butyl-3-(3-chloro-phenyl)-3-pyrimidin-2-yl-urea (4i)**<sup>[17]</sup>: Following the same procedure as for **4a** with **1i** (102.8 mg, 0.5 mmol), Cu(OAc)<sub>2</sub>·H<sub>2</sub>O (199.7 mg, 1.0 mmol), *tert*-butyl isocyanide (131.3 mg, 1.5 mmol) in toluene for 25 h to give **4i** as yellow solid (160.4 mg, 93%). M.p. 122-124 °C; IR (KBr, cm<sup>-1</sup>): 2968, 2925, 1709, 1661, 1565, 1411, 1311, 785, 704; <sup>1</sup>H NMR (CDCl<sub>3</sub>, 500 MHz): δ 8.74 (d, *J* = 4.5 Hz, 2H), 7.38-7.31 (m, 3H), 7.26-7.24 (m, 2H), 2.37 (s, 3H), 1.32 (s, 9H); <sup>13</sup>C NMR (CDCl<sub>3</sub>, 125 MHz): δ 170.0, 160.4, 159.0, 156.2, 141.3, 134.9, 130.3, 128.2, 127.3, 125.3, 119.7, 58.9, 27.7, 25.6; LC-MS (ESI) *m/z* 371.1 [M<sup>+</sup>Na (<sup>37</sup>Cl)], 369.1 [M<sup>+</sup>Na (<sup>35</sup>Cl)]; Anal. Calcd. For C<sub>17</sub>H<sub>19</sub>ClN<sub>4</sub>O<sub>2</sub>: C, 58.87; H, 5.52; N, 16.15. Found: C, 58.81; H, 5.46; N, 16.01.

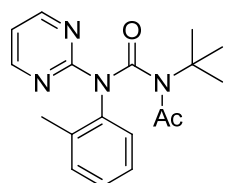

**1-Acetyl-1-tert-butyl-3-pyrimidin-2-yl-3-o-tolyl-urea (4j)**: Following the same procedure as for **4a** with **1j** (92.6 mg, 0.5 mmol), Cu(OAc)<sub>2</sub>·H<sub>2</sub>O (199.7 mg, 1.0 mmol), *tert*-butyl isocyanide (131.3 mg, 1.5 mmol) in toluene for 23 h to give **4j** as white solid (129.8 mg, 80%). M.p. 102-104 °C; IR (KBr, cm<sup>-1</sup>): 3007, 2969, 2925, 1700, 1667, 1566, 1409, 1310, 730; <sup>1</sup>H NMR (CDCl<sub>3</sub>, 500 MHz): δ 8.70 (d, *J* = 5.0 Hz, 2H), 7.51 (s, 1H), 7.32-7.26 (m, 3H), 7.17 (t, *J* = 5.0 Hz, 1H), 2.41 (s, 3H), 2.22 (s, 3H), 1.35 (s, 9H); <sup>13</sup>C NMR (CDCl<sub>3</sub>, 125 MHz): δ 170.2, 160.4, 158.6, 156.2, 139.1, 136.2, 131.4, 128.9, 127.0, 118.9, 58.8, 27.9, 25.7, 18.3; LC-MS (ESI) *m/z* 349.1 [M<sup>+</sup>Na]; Anal. Calcd. For C<sub>18</sub>H<sub>22</sub>N<sub>4</sub>O<sub>2</sub>: C, 66.24; H, 6.79; N, 17.17. Found: C, 66.12; H, 6.75; N, 17.04.

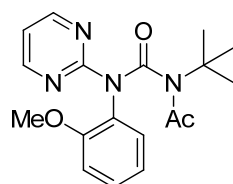

**1-Acetyl-1-tert-butyl-3-(2-methoxy-phenyl)-3-pyrimidin-2-yl-urea (4k)**: Following the same procedure as for **4a** with **1k** (100.6 mg, 0.5 mmol), Cu(OAc)<sub>2</sub>·H<sub>2</sub>O (199.7 mg, 1.0 mmol), *tert*-butyl isocyanide (131.3 mg, 1.5 mmol) in toluene for 24 h to give **4k** as white solid (129.1 mg, 76%). M.p. 132-133 °C; IR (KBr, cm<sup>-1</sup>): 2972, 2928, 1693, 1671, 1564, 1412, 1313, 750; <sup>1</sup>H NMR (CDCl<sub>3</sub>, 500 MHz): δ 8.66 (d, *J* = 5.0 Hz, 2H), 7.39 (d, *J* = 8.0 Hz, 1H), 7.35 (t, *J* = 8 Hz, 1H), 7.12 (t, *J* = 4.5 Hz, 1H), 7.04 (t, *J* = 7.5 Hz, 1H), 6.98 (d, *J* = 8.0 Hz, 1H), 3.73 (s, 3H), 2.37 (s, 3H), 1.35 (s, 9H); <sup>13</sup>C NMR (CDCl<sub>3</sub>, 125 MHz): δ 170.2, 160.7, 158.3, 155.9, 155.1, 129.8, 129.3, 129.2, 121.0, 118.5, 112.6, 58.6, 55.8, 27.8, 25.5; LC-MS (ESI) *m/z* 365.1 [M<sup>+</sup>Na]; Anal. Calcd. For C<sub>18</sub>H<sub>22</sub>N<sub>4</sub>O<sub>3</sub>: C, 63.14; H, 6.48; N, 16.36. Found: C, 63.09; H, 6.49; N, 16.29.

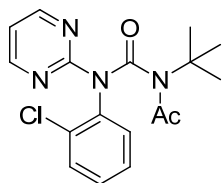

**1-Acetyl-1-tert-butyl-3-(2-chloro-phenyl)-3-pyrimidin-2-yl-urea (4l):** Following the same procedure as for **4a** with **1l** (102.8 mg, 0.5 mmol), Cu(OAc)<sub>2</sub>·H<sub>2</sub>O (199.7 mg, 1.0 mmol), *tert*-butyl isocyanide (131.3 mg, 1.5 mmol) in toluene for 21 h to give **4l** as white solid (135.9 mg, 78%). M.p. 132-134 °C; IR (KBr, cm<sup>-1</sup>): 2980, 2915, 1703, 1679, 1567, 1411, 1304, 732; <sup>1</sup>H NMR (CDCl<sub>3</sub>, 500 MHz): δ 8.68 (d, *J* = 5.0 Hz, 2H), 7.60 (d, *J* = 8.0 Hz, 1H), 7.47-7.41 (m, 2H), 7.36 (dt, *J* = 8.0, 1.5 Hz, 1H), 7.16 (t, *J* = 5.0 Hz, 1H), 2.39 (s, 3H), 1.37 (s, 9H); <sup>13</sup>C NMR (CDCl<sub>3</sub>, 125 MHz): δ 159.8, 158.5, 158.4, 156.3, 137.8, 132.5, 130.9, 130.6, 129.8, 127.8, 118.7, 58.9, 27.9, 25.7; LC-MS (ESI) *m/z* 371.1 [M<sup>+</sup>Na (<sup>37</sup>Cl)], 369.1 [M<sup>+</sup>Na (<sup>35</sup>Cl)]; Anal. Calcd. For C<sub>17</sub>H<sub>19</sub>ClN<sub>4</sub>O<sub>2</sub>: C, 58.87; H, 5.52; N, 16.15. Found: C, 58.60; H, 5.52; N, 15.92.

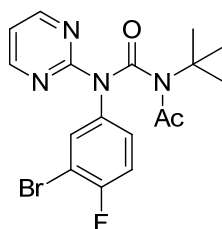

**1-Acetyl-3-(3-bromo-4-fluoro-phenyl)-1-tert-butyl-3-pyrimidin-2-yl-urea (4m)**<sup>[17]</sup>: Following the same procedure as for **4a** with **1m** (142.6 mg, 0.53 mmol), Cu(OAc)<sub>2</sub>·H<sub>2</sub>O (199.7 mg, 1.0 mmol), *tert*-butyl isocyanide (131.3 mg, 1.5 mmol) in toluene for 22 h to give **4m** as white solid (198.0 mg, 91%). M.p. 88-90 °C; IR (KBr, cm<sup>-1</sup>): 2981, 2925, 1707, 1676, 1566, 1412, 1309, 730; <sup>1</sup>H NMR (CDCl<sub>3</sub>, 500 MHz): δ 8.74 (d, *J* = 4.5 Hz, 2H), 7.56 (dd, <sup>4</sup>*J*<sub>F-H</sub> = 6.0, <sup>4</sup>*J*<sub>H-H</sub> = 3.0 Hz, 1H), 7.33-7.30 (m, 1H), 7.26 (t, *J* = 5.0 Hz, 1H), 7.18 (t, *J* = 8.5 Hz, 1H), 2.36 (s, 3H), 1.31 (s, 9H); <sup>19</sup>F NMR (CDCl<sub>3</sub>, 470 MHz): δ -107.2 (m, Ar-F); <sup>13</sup>C NMR (CDCl<sub>3</sub>, 125 MHz): δ 169.9, 160.3, 159.0, 158.4 (d, <sup>1</sup>*J*<sub>C-F</sub> = 247.5 Hz), 156.3, 136.8 (d, <sup>3</sup>*J*<sub>C-F</sub> = 3.8 Hz), 132.4, 128.0 (d, <sup>3</sup>*J*<sub>C-F</sub> = 7.5 Hz), 119.7, 117.0 (d, <sup>2</sup>*J*<sub>C-F</sub> = 23.8 Hz), 109.5 (d, <sup>2</sup>*J*<sub>C-F</sub> = 22.5 Hz), 58.9, 27.7, 25.6; LC-MS (ESI) *m/z* 433.0 [M<sup>+</sup>Na (<sup>81</sup>Br)], 431.0 [M<sup>+</sup>Na (<sup>79</sup>Br)]; Anal. Calcd. For C<sub>17</sub>H<sub>18</sub>BrFN<sub>4</sub>O<sub>2</sub>: C, 49.89; H, 4.43; N, 13.69. Found: C, 50.09; H, 4.64; N, 13.77.

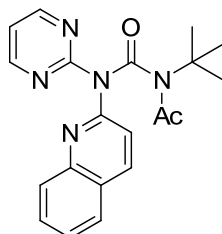

**1-Acetyl-1-tert-butyl-3-pyrimidin-2-yl-3-quinolin-2-yl-urea (4n):** Following the same procedure as for **4a** with **1n** (77.8 mg, 0.35 mmol), Cu(OAc)<sub>2</sub>·H<sub>2</sub>O (139.8 mg, 0.7 mmol), *tert*-butyl isocyanide (90 mg, 1.05 mmol) in *m*-xylene at 130 °C with O<sub>2</sub> balloon for 11 h to give **4n** as white solid (39.1 mg, 31%) together with recovered **1n** (34.1 mg, 56% conversion). M.p. 148-150 °C; IR (KBr, cm<sup>-1</sup>): 2976, 1688, 1670, 1566, 1404, 765; <sup>1</sup>H NMR (CDCl<sub>3</sub>, 500 MHz): δ 8.76 (d, *J* = 5.0 Hz, 2H), 8.25 (d, *J* = 8.5 Hz, 1H), 7.82 (d, *J* = 8.0 Hz, 2H), 7.70 (d, *J* = 9.0 Hz,

1H), 7.64 (td,  $J = 7.0, 1.5$  Hz, 1H), 7.52 (td,  $J = 7.5, 1.0$  Hz, 1H), 7.26 (t,  $J = 4.5$  Hz, 1H), 2.46 (s, 3H), 1.39 (s, 9H);  $^{13}\text{C}$  NMR ( $\text{CDCl}_3$ , 125 MHz):  $\delta$  170.2, 160.7, 158.8, 156.5, 152.9, 147.0, 138.4, 130.0, 129.0, 127.4, 127.0, 126.9, 119.4, 118.6, 59.4, 27.9, 25.9; LC-MS (ESI)  $m/z$  364.0 [ $\text{M}^+\text{H}$ ]; HRMS (ESI)  $m/z$  Calcd. for  $\text{C}_{20}\text{H}_{22}\text{N}_5\text{O}_2$  [ $\text{M}^+\text{H}$ ] 364.1773, found 364.1768.

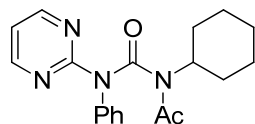

**1-Acetyl-1-cyclohexyl-3-phenyl-3-pyrimidin-2-yl-urea (5a)**<sup>[17]</sup>: Following the same procedure as for **4a** with **1d** (85.6 mg, 0.5 mmol),  $\text{Cu}(\text{OAc})_2 \cdot \text{H}_2\text{O}$  (199.7 mg, 1.0 mmol), cyclohexyl isonitrile (163.8 mg, 1.5 mmol) in toluene for 23 h to give **5a** as white solid (134.3 mg, 79%). M.p. 112-114 °C; IR (KBr,  $\text{cm}^{-1}$ ): 2967, 2930, 1707, 1688, 1564, 1410, 1226, 702;  $^1\text{H}$  NMR ( $\text{CDCl}_3$ , 500 MHz):  $\delta$  8.65 (d,  $J = 4.5$  Hz, 2H), 7.44 (t,  $J = 7.5$  Hz, 2H), 7.34 (t,  $J = 7.5$  Hz, 1H), 7.25 (d,  $J = 7.5$  Hz, 2H), 7.12 (t,  $J = 5.0$  Hz, 1H), 3.96-3.91 (m, 1H), 2.30 (s, 3H), 1.74-1.57 (m, 7H), 1.27-1.06 (m, 3H);  $^{13}\text{C}$  NMR ( $\text{CDCl}_3$ , 125 MHz):  $\delta$  170.9, 161.4, 158.6, 157.1, 140.8, 129.5, 127.8, 127.1, 118.2, 58.3, 30.1, 26.3, 25.4, 24.7; EI-MS  $m/z$  (%): 338 (3) [ $\text{M}^+$ ]; HRMS (EI)  $m/s$  calcd for  $\text{C}_{19}\text{H}_{22}\text{N}_4\text{O}_2$  338.1743, found 338.1742.

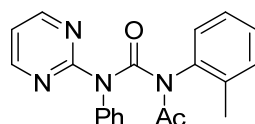

**1-Acetyl-3-phenyl-3-pyrimidin-2-yl-1-o-tolyl-urea (5c)**: Following the same procedure as for **4a** with **1d** (85.6 mg, 0.5 mmol),  $\text{Cu}(\text{OAc})_2 \cdot \text{H}_2\text{O}$  (199.7 mg, 1.0 mmol), 2-methylisonitrile (175.7 mg, 1.5 mmol) in toluene for 19 h to give **5c** as yellow liquid (86.3 mg, 50%). IR (KBr,  $\text{cm}^{-1}$ ): 3039, 1702, 1594, 1564, 1410, 1242, 724;  $^1\text{H}$  NMR ( $\text{CDCl}_3$ , 500 MHz):  $\delta$  8.55 (d,  $J = 4.5$  Hz, 2H), 7.29-7.28 (m, 3H), 7.14 (t,  $J = 7.0$  Hz, 1H), 7.07-7.04 (m, 3H), 6.99 (t,  $J = 5.0$  Hz, 1H), 6.89 (d,  $J = 4.5$  Hz, 2H), 2.45 (s, 3H), 1.90 (s, 3H);  $^{13}\text{C}$  NMR ( $\text{CDCl}_3$ , 125 MHz):  $\delta$  172.9, 161.4, 158.3, 157.1, 139.9, 137.0, 136.7, 130.8, 129.3, 128.3, 128.1, 127.7, 127.6, 126.4, 117.1, 25.0, 17.9; EI-MS  $m/z$  (%): 346 (5) [ $\text{M}^+$ ], 170 (100); HRMS (EI):  $m/s$  Calcd. for  $\text{C}_{20}\text{H}_{18}\text{N}_4\text{O}_2$ : 346.1430, found: 346.1428.

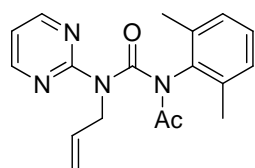

**1-Acetyl-3-allyl-1-(2,6-dimethyl-phenyl)-3-pyrimidin-2-yl-urea (5d)**<sup>[17]</sup>: Following the same procedure as for **4a** with **1d** (72.4 mg, 0.54 mmol),  $\text{Cu}(\text{OAc})_2 \cdot \text{H}_2\text{O}$  (199.7 mg, 1.0 mmol), 2,6-xyllyl isocyanide (196.8 mg, 1.5 mmol) in toluene for 13 h to give **5d** as white solid (157.8 mg, 90%). M.p. 82-84 °C; IR (KBr,  $\text{cm}^{-1}$ ): 2956, 2916, 1706, 1677, 1562, 1442, 1233, 808, 764;  $^1\text{H}$  NMR ( $\text{CDCl}_3$ , 500 MHz):  $\delta$  8.53 (d,  $J = 4.5$  Hz, 2H), 7.13 (A of  $\text{ABB}'$ ,  $J = 7.5$  Hz, 1H), 7.06 ( $\text{BB}'$  of  $\text{ABB}'$ ,  $J = 7.5$  Hz, 2H), 6.93 (t,  $J = 5.0$  Hz, 1H), 6.00-5.92 (m, 1H), 5.27 (dd,  $J = 18.0, 1.5$  Hz, 1H), 5.09 (dd,  $J = 10.5, 1.5$  Hz, 1H), 4.76 (d,  $J = 5.5$  Hz, 2H), 2.31 (s, 6H), 1.88 (s, 3H);  $^{13}\text{C}$  NMR ( $\text{CDCl}_3$ , 125 MHz):  $\delta$  172.6, 160.7, 157.6, 154.1, 137.7, 136.8, 133.5, 128.8, 128.5, 116.9, 116.4, 51.1, 24.8, 18.7; LC-MS (ESI)  $m/z$  325.2 [ $\text{M}^+\text{H}$ ]; Anal. Calcd. For  $\text{C}_{18}\text{H}_{20}\text{N}_4\text{O}_2$ : C, 66.65; H, 6.21; N, 17.27. Found: C, 66.65; H, 6.25; N, 16.97.

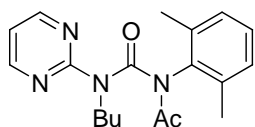

**1-Acetyl-3-butyl-1-(2,6-dimethyl-phenyl)-3-pyrimidin-2-yl-urea (5e)**<sup>[17]</sup>: Following the same procedure as for **4a** with **1d** (80.6 mg, 0.53 mmol), Cu(OAc)<sub>2</sub>·H<sub>2</sub>O (199.7 mg, 1.0 mmol), 2,6-xylyl isocyanide (196.8 mg, 1.5 mmol) in toluene for 13 h to give **5e** as white solid (158.1 mg, 88%). M.p. 106-108 °C; IR (KBr, cm<sup>-1</sup>): 2960, 2931, 1702, 1676, 1561, 1423, 1246, 806, 782; <sup>1</sup>H NMR (CDCl<sub>3</sub>, 500 MHz): δ 8.51 (d, *J* = 5.0 Hz, 2H), 7.12 (t, *J* = 7.5 Hz, 1H), 7.04 (d, *J* = 7.5 Hz, 2H), 6.92 (t, *J* = 5.0 Hz, 1H), 4.12 (t, *J* = 7.5 Hz, 2H), 2.30 (s, 6H), 1.90 (s, 3H), 1.62 (quint, *J* = 7.5 Hz, 2H), 1.33 (sext, *J* = 7.5 Hz, 2H), 0.88 (t, *J* = 7.5 Hz, 3H); <sup>13</sup>C NMR (CDCl<sub>3</sub>, 125 MHz): δ 172.6, 160.9, 157.6, 154.5, 137.7, 136.8, 128.8, 128.4, 116.2, 49.1, 30.7, 24.8, 20.1, 18.7, 13.9; LC-MS (ESI) *m/z* 341.2 [M<sup>+</sup>H]; Anal. Calcd. For C<sub>19</sub>H<sub>24</sub>N<sub>4</sub>O<sub>2</sub>: C, 67.04; H, 7.11; N, 16.46. Found: C, 66.86; H, 7.08; N, 16.19.

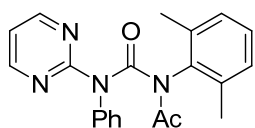

**1-Acetyl-1-(2,6-dimethyl-phenyl)-3-phenyl-3-pyrimidin-2-yl-urea (5f)**: Following the same procedure as for **4a** with **1d** (85.6 mg, 0.5 mmol), Cu(OAc)<sub>2</sub>·H<sub>2</sub>O (199.7 mg, 1.0 mmol), 2,6-xylyl isocyanide (196.8 mg, 1.5 mmol) in toluene for 13 h to give **5f** as white solid (167.2 mg, 93%). M.p. 148-150 °C; IR (KBr, cm<sup>-1</sup>): 2920, 1718, 1684, 1578, 1563, 1419, 1238, 712; <sup>1</sup>H NMR (CDCl<sub>3</sub>, 500 MHz): δ 8.52 (d, *J* = 4.5 Hz, 2H), 7.30-7.29 (m, 3H), 7.07 (t, *J* = 7.5 Hz, 1H), 6.97-6.92 (m, 5H), 2.38 (s, 3H), 2.09 (s, 6H); <sup>13</sup>C NMR (CDCl<sub>3</sub>, 125 MHz): δ 173.3, 161.7, 158.0, 156.7, 139.8, 137.2, 136.3, 129.3, 128.5, 128.4, 128.3, 127.9, 116.7, 25.3, 18.5; EI-MS *m/z* (%): 360 (10) [M<sup>+</sup>], 170 (100); Anal. Calcd. For C<sub>21</sub>H<sub>20</sub>N<sub>4</sub>O<sub>2</sub>: C, 69.98; H, 5.59; N, 15.55. Found: C, 69.90; H, 5.63; N, 15.29.

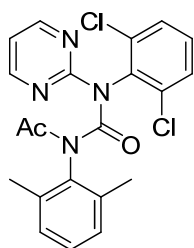

**1-Acetyl-3-(2,6-dichloro-phenyl)-1-(2,6-dimethyl-phenyl)-3-pyrimidin-2-yl-urea (5g)**: Following the same procedure as for **4a** with **1d** (84.0 mg, 0.35 mmol), Cu(OAc)<sub>2</sub>·H<sub>2</sub>O (140.0 mg, 0.7 mmol), 2,6-xylyl isocyanide (137.7 mg, 1.1 mmol) in toluene for 14 h to give **5g** as white solid (114.6 mg, 76%). M.p. 196-198 °C; IR (KBr, cm<sup>-1</sup>): 3033, 2917, 1724, 1691, 1565, 1417, 1311, 1234, 782, 772; <sup>1</sup>H NMR (CDCl<sub>3</sub>, 500 MHz): δ 8.58 (d, *J* = 5.0 Hz, 2H), 7.29 (m, 2H), 7.19 (t, *J* = 8.0 Hz, 1H), 7.11 (t, *J* = 7.5 Hz, 1H), 7.02 (t, *J* = 4.5 Hz, 1H), 6.98 (d, *J* = 5.5 Hz, 2H), 2.24 (s, 9H); <sup>13</sup>C NMR (CDCl<sub>3</sub>, 125 MHz): δ 172.8, 160.4, 158.0, 137.3, 136.3, 135.7, 129.3, 128.8, 128.7, 128.5, 117.0, 25.1, 18.5; EI-MS *m/z* (%): 430 [M<sup>+</sup> (<sup>37</sup>Cl, <sup>35</sup>Cl)], 428 [M<sup>+</sup> (2×<sup>35</sup>Cl)]; HRMS (EI) *m/s* calcd. for C<sub>21</sub>H<sub>18</sub>Cl<sub>2</sub>N<sub>4</sub>O<sub>2</sub> 428.0807, found 428.0804.



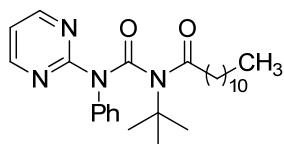

**1-tert-Butyl-1-dodecanoyl-3-phenyl-3-pyrimidin-2-yl-urea (5i):** Following the same procedure as for **4a** with **1d** (85.6 mg, 0.5 mmol), copper (II) laurate monohydrate (424.1 mg, 1.0 mmol), *tert*-butyl isocyanide (131.3 mg, 1.5 mmol) in toluene for 23 h to give **5i** as yellow liquid (144.8 mg, 64%) together with recovered **1d** (22.9 mg, 74% conversion). IR (KBr,  $\text{cm}^{-1}$ ): 2925, 2854, 1701, 1675, 1565, 1409, 722;  $^1\text{H}$  NMR ( $\text{CDCl}_3$ , 500 MHz):  $\delta$  8.70 (d,  $J = 5.0$  Hz, 2H), 7.43 (t,  $J = 8.0$  Hz, 2H), 7.35-7.32 (m, 3H), 7.20 (t,  $J = 5.0$  Hz, 1H), 2.77-2.74 (m, 1H), 2.59-2.58 (m, 1H), 1.70-1.66 (m, 2H), 1.35-1.25 (m, 25H), 0.87 (t,  $J = 6.5$  Hz, 3H);  $^{13}\text{C}$  NMR ( $\text{CDCl}_3$ , 125 MHz):  $\delta$  172.9, 160.9, 158.8, 156.1, 140.4, 129.4, 127.9, 127.0, 119.3, 58.7, 37.4, 31.9, 29.7, 29.7, 29.6, 29.5, 29.4, 29.3, 27.8, 25.1, 22.7, 14.1; LC-MS (ESI)  $m/z$  475.2 [ $\text{M}^+\text{Na}$ ]; HRMS (ESI)  $m/s$  calcd for  $\text{C}_{27}\text{H}_{41}\text{N}_4\text{O}_2$  [ $\text{M}^+\text{H}$ ] 453.3230, found 453.3222.

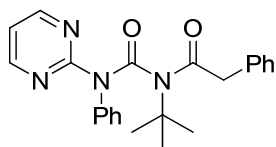

**1-tert-Butyl-3-phenyl-1-phenylacetyl-3-pyrimidin-2-yl-urea (5j):** Following the same procedure as for **4a** with **1d** (51.4 mg, 0.3 mmol), copper (II) phenylacetate monohydrate (250.4 mg, 0.75 mmol), *tert*-butyl isocyanide (74.8 mg, 0.9 mmol) in toluene at 90 °C for 41 h to give **5j** as white solid (66.2 mg, 57%) together with recovered **1d** (5.7 mg, 89% conversion). M.p. 128-130 °C; IR (KBr,  $\text{cm}^{-1}$ ): 2977, 1704, 1674, 1564, 1409, 1320, 720;  $^1\text{H}$  NMR ( $\text{CDCl}_3$ , 500 MHz):  $\delta$  8.75 (d,  $J = 5.0$  Hz, 2H), 7.46 (t,  $J = 7.5$  Hz, 2H), 7.41 (d,  $J = 8.5$  Hz, 2H), 7.38-7.32 (m, 5H), 7.26 (d,  $J = 6.5$  Hz, 1H), 7.23 (t,  $J = 5.0$  Hz, 1H), 4.25 (d,  $J = 15.5$  Hz, 1H), 3.96 (d,  $J = 16.0$  Hz, 1H), 1.34 (s, 9H);  $^{13}\text{C}$  NMR ( $\text{CDCl}_3$ , 125 MHz):  $\delta$  170.7, 160.9, 158.9, 156.1, 140.3, 135.5, 130.0, 129.5, 128.3, 128.1, 127.0, 126.6, 119.5, 59.1, 43.8, 27.8; LC-MS (ESI)  $m/z$  389.1 [ $\text{M}^+\text{H}$ ]; Anal. Calcd. For  $\text{C}_{23}\text{H}_{24}\text{N}_4\text{O}_2$ : C, 71.11; H, 6.23; N, 14.42. Found: C, 71.18; H, 6.41; N, 14.44.

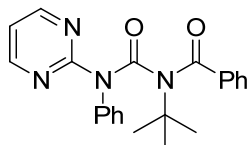

**1-Benzoyl-1-tert-butyl-3-phenyl-3-pyrimidin-2-yl-urea (5k):** Following the same procedure as for **4a** with **1d** (85.6 mg, 0.5 mmol), copper (II) benzoate monohydrate (323.8 mg, 1.0 mmol), *tert*-butyl isocyanide (131.3 mg, 1.5 mmol) in toluene for 33 h to give **5k** as white solid (165.2 mg, 88%). M.p. 110-111 °C; IR (KBr,  $\text{cm}^{-1}$ ): 2983, 1702, 1648, 1565, 1405, 1314, 697;  $^1\text{H}$  NMR ( $\text{CDCl}_3$ , 500 MHz):  $\delta$  8.56 (d,  $J = 4.5$  Hz, 2H), 7.48-7.43 (m, 3H), 7.37 (t,  $J = 7.5$  Hz, 2H), 7.28-7.21 (m, 3H), 7.04 (t,  $J = 4.5$  Hz, 1H), 6.65 (d,  $J = 6.5$  Hz, 2H), 1.70 (s, 9H);  $^{13}\text{C}$  NMR ( $\text{CDCl}_3$ , 125 MHz):  $\delta$  170.0, 160.4, 158.1, 155.6, 140.3, 138.0, 131.0, 129.1, 128.2, 127.9, 127.7, 127.3, 117.6, 60.4, 28.7; LC-MS (ESI)  $m/z$  375.1 [ $\text{M}^+\text{H}$ ]; Anal. Calcd. For  $\text{C}_{22}\text{H}_{22}\text{N}_4\text{O}_2$ : C, 70.57; H, 5.92; N, 14.96. Found: C, 70.83; H, 6.13; N, 14.68.

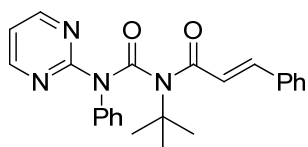

**1-tert-Butyl-3-phenyl-1-(3-phenyl-acryloyl)-3-pyrimidin-2-yl-urea (5l):** Following the same procedure as for **4a** with **1d** (85.6 mg, 0.5 mmol), copper (II) cinnamate monohydrate (375.9 mg, 1.0 mmol), *tert*-butyl isocyanide (131.3 mg, 1.5 mmol) in toluene for 33 h to give **5l** as white solid (157.0 mg, 78%). M.p. 146-148 °C; IR (KBr,  $\text{cm}^{-1}$ ): 2974, 2930, 1693, 1664, 1567, 1410, 1193, 762, 703;  $^1\text{H}$  NMR ( $\text{CDCl}_3$ , 500 MHz):  $\delta$  8.70 (d,  $J = 5.0$  Hz, 2H), 7.62 (d,  $J = 15.0$  Hz, 1H), 7.58 (d,  $J = 6.5$  Hz, 2H), 7.42 (t,  $J = 8.0$  Hz, 2H), 7.38-7.34 (m, 6H), 7.27 (d,  $J = 14.0$  Hz, 1H), 7.16 (t,  $J = 5.0$  Hz, 1H), 1.48 (s, 9H);  $^{13}\text{C}$  NMR ( $\text{CDCl}_3$ , 125 MHz):  $\delta$  165.4, 161.0, 158.8, 156.0, 142.0, 140.3, 135.3, 129.7, 129.5, 128.8, 128.2, 128.1, 127.5, 121.7, 119.1, 59.3, 28.0; LC-MS (ESI)  $m/z$  401.1 [ $\text{M}^+\text{H}$ ]; Anal. Calcd. For  $\text{C}_{24}\text{H}_{24}\text{N}_4\text{O}_2$ : C, 71.98; H, 6.04; N, 13.99. Found: C, 71.85; H, 6.17; N, 13.78.

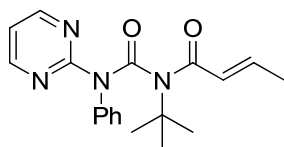

**1-But-2-enoyl-1-tert-butyl-3-phenyl-3-pyrimidin-2-yl-urea (5m):** Following the same procedure as for **4a** with **1d** (85.6 mg, 0.5 mmol), copper (II) crotonate monohydrate (233.7 mg, 1.0 mmol), *tert*-butyl isocyanide (131.3 mg, 1.5 mmol) in toluene at 90 °C for 26 h to give **5m** as white solid (78.7 mg, 47%). M.p. 116-118 °C; IR (KBr,  $\text{cm}^{-1}$ ): 2973, 2925, 1689, 1672, 1565, 1407, 1330, 1191, 723;  $^1\text{H}$  NMR ( $\text{CDCl}_3$ , 500 MHz):  $\delta$  8.69 (d,  $J = 5.0$  Hz, 2H), 7.42 (t,  $J = 7.5$  Hz, 2H), 7.35-7.33 (m, 3H), 7.16 (t,  $J = 4.5$  Hz, 1H), 6.84 (dq,  $J = 15.0, 7.5$  Hz, 1H), 6.53 (dq,  $J = 15.0, 2.0$  Hz, 1H), 1.87 (dd,  $J = 7.0, 2.0$  Hz, 3H), 1.40 (s, 9H);  $^{13}\text{C}$  NMR ( $\text{CDCl}_3$ , 125 MHz):  $\delta$  165.5, 160.9, 158.7, 156.1, 141.1, 140.4, 129.4, 128.0, 127.3, 125.7, 119.1, 59.0, 27.9, 18.1; LC-MS (ESI)  $m/z$  339.1 [ $\text{M}^+\text{H}$ ]; Anal. Calcd. For  $\text{C}_{19}\text{H}_{22}\text{N}_4\text{O}_2$ : C, 67.44; H, 6.55; N, 16.56. Found: C, 67.70; H, 6.42; N, 16.57.

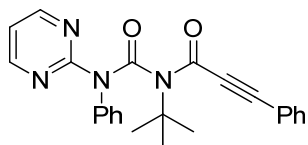

**1-tert-Butyl-3-phenyl-1-(3-phenyl-propynoyl)-3-pyrimidin-2-yl-urea (5n):** Following the same procedure as for **4a** with **1d** (85.6 mg, 0.5 mmol), copper (II) phenylpropionate multihydrate (851.7 mg, 2.0 mmol), *tert*-butyl isocyanide (249.4 mg, 3.0 mmol) in toluene at 90 °C for 22 h to give **5n** as white solid (93.5 mg, 47%). M.p. 37-39 °C; IR (KBr,  $\text{cm}^{-1}$ ): 2981, 2927, 2211, 1703, 1646, 1565, 1407, 691;  $^1\text{H}$  NMR ( $\text{CDCl}_3$ , 500 MHz):  $\delta$  8.67 (d,  $J = 5.0$  Hz, 2H), 7.57 (d,  $J = 7.5$  Hz, 2H), 7.40-7.30 (m, 8H), 7.14 (t,  $J = 4.5$  Hz, 1H), 1.57 (s, 9H);  $^{13}\text{C}$  NMR ( $\text{CDCl}_3$ , 125 MHz):  $\delta$  160.8, 158.4, 154.5, 151.8, 140.8, 132.9, 130.1, 129.3, 128.4, 128.0, 127.6, 120.4, 118.7, 88.3, 83.6, 60.1, 27.7; LC-MS (ESI)  $m/z$  399.1 [ $\text{M}^+\text{H}$ ]; HRMS (ESI)  $m/s$  calcd for  $\text{C}_{24}\text{H}_{23}\text{N}_4\text{O}_2$  [ $\text{M}^+\text{H}$ ] 399.1821, found 399.1807.

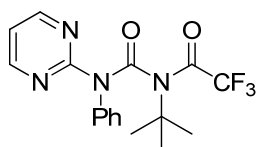

**1-tert-Butyl-3-phenyl-3-pyrimidin-2-yl-1-(2,2,2-trifluoro-acetyl)-urea (5o)**: Following the same procedure as for **4a** with **1d** (85.6 mg, 0.5 mmol), copper (II) trifluoroacetate (289.6 mg, 1.0 mmol), *tert*-butyl isocyanide (131.3 mg, 1.5 mmol) in toluene at 90 °C for 45 h to give **5o** as white solid (58.2 mg, 32%) together with recovered **1d** (26.6 mg, 69% conversion). M.p. 118-119 °C; IR (KBr,  $\text{cm}^{-1}$ ): 2977, 2934, 1721, 1695, 1570, 1409, 1325, 1134, 725;  $^1\text{H}$  NMR ( $\text{CDCl}_3$ , 500 MHz):  $\delta$  8.68 (d,  $J = 5.0$  Hz, 2H), 7.46 (t,  $J = 7.0$  Hz, 2H), 7.39 (t,  $J = 7.5$  Hz, 1H), 7.32 (d,  $J = 7.5$  Hz, 2H), 7.18 (t,  $J = 5.0$  Hz, 1H), 1.35 (s, 9H);  $^{19}\text{F}$  NMR ( $\text{CDCl}_3$ , 470 MHz):  $\delta$  -70.74 (s);  $^{13}\text{C}$  NMR ( $\text{CDCl}_3$ , 125 MHz):  $\delta$  160.2, 158.5, 157.0 (q,  $^2J_{\text{C-F}} = 36.8$  Hz), 151.9, 139.9, 129.6, 128.5, 127.5, 119.0, 116.0 (q,  $^1J_{\text{C-F}} = 287.5$  Hz), 61.5, 27.1; LC-MS (ESI)  $m/z$  367.0 [ $\text{M}^+$ ]; Anal. Calcd. For  $\text{C}_{17}\text{H}_{17}\text{F}_3\text{N}_4\text{O}_2$ : C, 55.74; H, 4.68; N, 15.29. Found: C, 55.88; H, 4.90; N, 15.20.

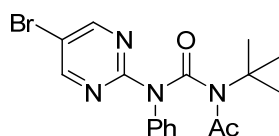

**1-Acetyl-3-(5-bromo-pyrimidin-2-yl)-1-tert-butyl-3-phenyl-urea (6a)**<sup>[17]</sup>: Following the same procedure as for **4a** with **1p** (125.0 mg, 0.5 mmol),  $\text{Cu}(\text{OAc})_2 \cdot \text{H}_2\text{O}$  (199.7 mg, 1.0 mmol), *tert*-butyl isocyanide (131.3 mg, 1.5 mmol) in toluene for 21 h to give **6a** as white solid (97.3 mg, 50%). M.p. 94-96 °C; IR (KBr,  $\text{cm}^{-1}$ ): 2984, 2955, 1705, 1665, 1539, 1412, 1017, 731;  $^1\text{H}$  NMR ( $\text{CDCl}_3$ , 500 MHz):  $\delta$  8.75 (s, 2H), 7.44 (t,  $J = 8.0$  Hz, 2H), 7.36-7.31 (m, 3H), 2.35 (s, 3H), 1.36 (s, 9H);  $^{13}\text{C}$  NMR ( $\text{CDCl}_3$ , 125 MHz):  $\delta$  169.9, 159.5, 159.1, 156.1, 140.0, 129.6, 128.2, 127.1, 117.9, 59.0, 27.8, 25.5; EI-MS  $m/z$  (%): 392 (0.6) [ $\text{M}^+$  ( $^{81}\text{Br}$ )], 390 (0.6) [ $\text{M}^+$  ( $^{79}\text{Br}$ )], 251 (100); HRMS (EI)  $m/z$  Calcd. for  $\text{C}_{17}\text{H}_{19}\text{BrN}_4\text{O}_2$  390.0691, found 390.0695.

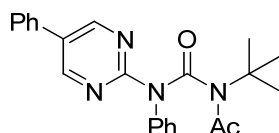

**1-Acetyl-1-tert-butyl-3-phenyl-3-(5-phenyl-pyrimidin-2-yl)-urea (6b)**<sup>[17]</sup>: Following the same procedure as for **4a** with **1q** (86.6 mg, 0.35 mmol),  $\text{Cu}(\text{OAc})_2 \cdot \text{H}_2\text{O}$  (139.8 mg, 0.7 mmol), *tert*-butyl isocyanide (91.9 mg, 1.1 mmol) in toluene for 12 h to give **6b** as yellow liquid (86.4 mg, 64%). IR (KBr,  $\text{cm}^{-1}$ ): 2978, 1705, 1672, 1424, 1302, 1191, 758, 694;  $^1\text{H}$  NMR ( $\text{CDCl}_3$ , 500 MHz):  $\delta$  8.93 (s, 2H), 7.56 (d,  $J = 7.5$  Hz, 2H), 7.52 (t,  $J = 7.5$  Hz, 2H), 7.49-7.44 (m, 3H), 7.40 (d,  $J = 7.5$  Hz, 2H), 7.35 (t,  $J = 7.0$  Hz, 1H), 2.44 (s, 3H), 1.38 (s, 9H);  $^{13}\text{C}$  NMR ( $\text{CDCl}_3$ , 125 MHz):  $\delta$  170.1, 159.6, 156.6, 156.3, 140.4, 133.1, 132.3, 129.6, 129.5, 129.4, 128.0, 127.0, 126.9, 58.9, 27.8, 25.6; LC-MS (ESI)  $m/z$  411.2 [ $\text{M}^+\text{Na}$ ]; HRMS (ESI) calcd for  $\text{C}_{23}\text{H}_{24}\text{N}_4\text{NaO}_2$  [ $\text{M}^+\text{Na}$ ] 411.1797, found 411.1791.

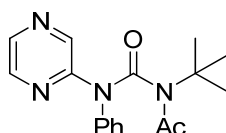

**1-Acetyl-1-*tert*-butyl-3-phenyl-3-pyrazin-2-yl-urea (6c)**<sup>[17]</sup>: Following the same procedure as for **4a** with **1r** (85.6 mg, 0.5 mmol), Cu(OAc)<sub>2</sub>·H<sub>2</sub>O (199.7 mg, 1.0 mmol), *tert*-butyl isonitrile (131.3 mg, 1.5 mmol) in toluene for 18 h to give **6c** as yellow solid (93.4 mg, 60%). M.p. 80-82 °C; IR (KBr, cm<sup>-1</sup>): 2979, 1702, 1674, 1405, 1294, 1016, 728; <sup>1</sup>H NMR (CDCl<sub>3</sub>, 500 MHz): δ 8.57 (s, 1H), 8.47 (s, 2H), 7.44 (t, *J* = 7.5 Hz, 2H), 7.35 (t, *J* = 7.5 Hz, 1H) 7.30 (d, *J* = 7.0 Hz, 2H), 2.33 (s, 3H), 1.31 (s, 9H); <sup>13</sup>C NMR (CDCl<sub>3</sub>, 125 MHz): δ 169.6, 156.6, 143.2, 143.0, 142.5, 140.4, 129.8, 128.3, 127.2, 58.9, 27.8, 25.6; LC-MS (ESI) *m/z* 335.1 [M<sup>+</sup>Na]; HRMS (ESI) calcd for C<sub>17</sub>H<sub>20</sub>N<sub>4</sub>NaO<sub>2</sub> [M<sup>+</sup>Na] 335.1484, found 335.1483.

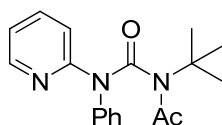

**1-Acetyl-1-*tert*-butyl-3-phenyl-3-pyridin-2-yl-urea (6d)**<sup>[17]</sup>: Following the same procedure as for **4a** with **1s** (85.1 mg, 0.5 mmol), Cu(OAc)<sub>2</sub>·H<sub>2</sub>O (199.7 mg, 1.0 mmol), *tert*-butyl isocyanide (131.3 mg, 1.5 mmol) in toluene for 26 h to give **6d** as white solid (110.5 mg, 71%). M.p. 92-94 °C; IR (KBr, cm<sup>-1</sup>): 2961, 2925, 1695, 1665, 1469, 1318, 783, 711; <sup>1</sup>H NMR (CDCl<sub>3</sub>, 500 MHz): δ 8.52-8.51(m, 1H), 7.72 (dt, *J* = 8.0, 1.5 Hz, 1H), 7.40 (t, *J* = 7.5 Hz, 2H), 7.32-7.29 (m, 3H), 7.23-7.21 (m, 1H), 7.17 (d, *J* = 8.0 Hz, 1H), 2.37 (s, 3H), 1.31 (s, 9H); <sup>13</sup>C NMR (CDCl<sub>3</sub>, 125 MHz): δ 169.8, 156.5, 154.9, 149.3, 141.4, 138.3, 129.5, 127.6, 126.9, 122.6, 121.6, 58.6, 27.7, 25.7; LC-MS (ESI) *m/z* 312.1 [M<sup>+</sup>H]; Anal. Calcd. For C<sub>18</sub>H<sub>21</sub>N<sub>3</sub>O<sub>2</sub>: C, 69.43; H, 6.80; N, 13.49. Found: C, 69.26; H, 6.78; N, 13.31.

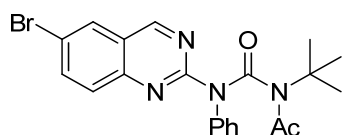

**1-Acetyl-3-(6-bromoquinazolin-2-yl)-1-*tert*-butyl-3-phenyl-urea (6e)**: Following the same procedure as for **4a** with **1t** (150.1 mg, 0.5 mmol), Cu(OAc)<sub>2</sub>·H<sub>2</sub>O (199.7 mg, 1.0 mmol), *tert*-butyl isocyanide (131.3 mg, 1.5 mmol) in toluene for 24 h to give **6e** as yellow liquid (90.9 mg, 41%). IR (KBr, cm<sup>-1</sup>): 2977, 2927, 1700, 1669, 1569, 1420, 836; <sup>1</sup>H NMR (CDCl<sub>3</sub>, 500 MHz): δ 9.28 (s, 1H), 8.09 (d, *J* = 2.0 Hz, 1H), 7.99 (dd, *J* = 9.0, 2.0 Hz, 1H), 7.86 (d, *J* = 9.0 Hz, 1H), 7.45-7.39 (m, 4H), 7.34 (t, *J* = 7.5 Hz, 1H), 2.47 (s, 3H), 1.31 (s, 9H); <sup>13</sup>C NMR (CDCl<sub>3</sub>, 125 MHz): δ 170.0, 161.4, 157.1, 156.3, 149.7, 140.3, 138.7, 129.9, 129.4, 129.3, 128.0, 127.1, 123.8, 122.3, 58.8, 27.8, 25.8; LC-MS (ESI) *m/z* 465.1 [M<sup>+</sup>Na (<sup>81</sup>Br)], 463.1 [M<sup>+</sup>Na (<sup>79</sup>Br)]; HRMS (ESI) calcd for C<sub>21</sub>H<sub>21</sub>BrN<sub>4</sub>NaO<sub>2</sub> [M<sup>+</sup>Na] 463.0746, found 463.0738.

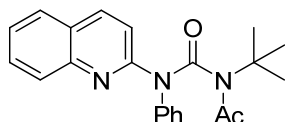

**1-Acetyl-1-*tert*-butyl-3-phenyl-3-quinolin-2-yl-urea (6f)**: Following the same procedure as for **4a** with **1u** (110.1 mg, 0.5 mmol), Cu(OAc)<sub>2</sub>·H<sub>2</sub>O (199.7 mg, 1.0 mmol), *tert*-butyl isocyanide (131.3 mg, 1.5 mmol) in toluene for 18 h to give **6f** as yellow solid (122.6 mg, 68%). M.p. 90-92 °C; IR (KBr, cm<sup>-1</sup>): 2978, 2928, 1698, 1669, 1593, 1501, 1296, 1193, 824, 756; <sup>1</sup>H NMR (CDCl<sub>3</sub>, 500 MHz): δ 8.13 (d, *J* = 8.5 Hz, 1H), 8.02 (d, *J* = 8.0 Hz, 1H), 7.79 (d, *J* = 8.0 Hz, 1H), 7.74 (td, *J* = 7.0, 1.0 Hz, 1H), 7.57 (td, *J* = 8.0, 1.0 Hz, 1H), 7.42 (t, *J* = 7.0 Hz, 2H), 7.37 (d, *J* = 7.5 Hz,

2H), 7.32 (t,  $J = 8.0$  Hz, 1H), 7.12 (d,  $J = 8.5$  Hz, 1H), 2.47 (s, 3H), 1.31 (s, 9H);  $^{13}\text{C}$  NMR ( $\text{CDCl}_3$ , 125 MHz):  $\delta$  169.7, 156.6, 153.1, 146.9, 141.0, 138.7, 130.5, 129.5, 129.2, 127.8, 127.4, 127.3, 127.0, 126.6, 119.1, 58.6, 27.9, 25.9; LC-MS (ESI)  $m/s$  384.0 [ $\text{M}^+\text{Na}$ ]; HRMS (ESI) calcd for  $\text{C}_{22}\text{H}_{23}\text{N}_3\text{NaO}_2$  [ $\text{M}^+\text{Na}$ ] 384.1688, found 384.1679.

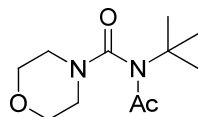

***N*-acetyl-*N*-*tert*-butylmorpholine-4-carboxamide (6g):** Following the same procedure as for **4a** with morpholine (43.6 mg, 0.5 mmol),  $\text{Cu}(\text{OAc})_2 \cdot \text{H}_2\text{O}$  (199.7 mg, 1.0 mmol), *tert*-butyl isocyanide (131.3 mg, 1.5 mmol) in toluene for 22 h to give **6g** as pale yellow oil (79.7 mg, 70%). IR (KBr,  $\text{cm}^{-1}$ ): 2967, 2924, 2856, 1681, 1426, 1364, 1317, 1273, 1220, 1196, 1117, 1027, 597;  $^1\text{H}$  NMR ( $\text{CDCl}_3$ , 500 MHz):  $\delta$  3.73-3.53 (m, 8H), 2.00 (s, 3H), 1.45 (s, 9H);  $^{13}\text{C}$  NMR ( $\text{CDCl}_3$ , 125 MHz):  $\delta$  168.7, 156.3, 66.7, 66.4, 57.9, 47.1, 43.8, 28.1, 24.0; LC-MS (ESI)  $m/s$  251.1 [ $\text{M}^+\text{Na}$ ]; HRMS (ESI) calcd for  $\text{C}_{11}\text{H}_{20}\text{N}_2\text{NaO}_3$  [ $\text{M}^+\text{Na}$ ] 251.1368, found 251.1366.

## 6. Mechanistic Studies

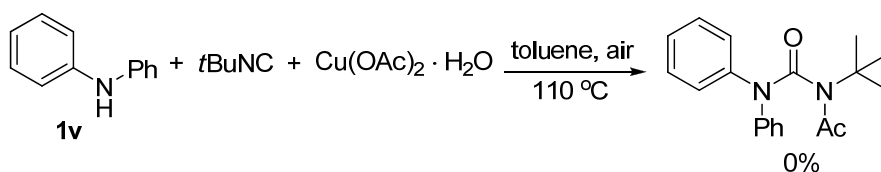

Following the same procedure as for **4a** with **1v** (16.9 mg, 0.1 mmol),  $\text{Cu}(\text{OAc})_2 \cdot \text{H}_2\text{O}$  (40.0 mg, 0.2 mmol) and *tert*-butyl isocyanide (26 mg, 0.3 mmol) in toluene for 20 h, no desired urea product was detected by TLC and LC-MS.

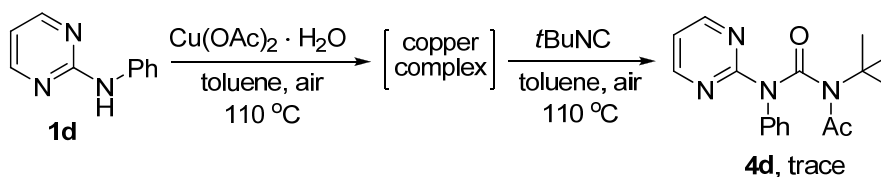

Following the same procedure as for **4a** with **1d** (342.4 mg, 2.0 mmol),  $\text{Cu}(\text{OAc})_2 \cdot \text{H}_2\text{O}$  (798.6 mg, 4.0 mmol) in toluene for 1 h and monitored by TLC. Upon completion, the reaction mixture filtered and washed with water to give copper complex. Then the given copper complex and *tert*-butyl isocyanide was mixed in toluene and was stirred under 110 °C for 24 h, only trace amount of **4d** was detected which was monitored by TLC.

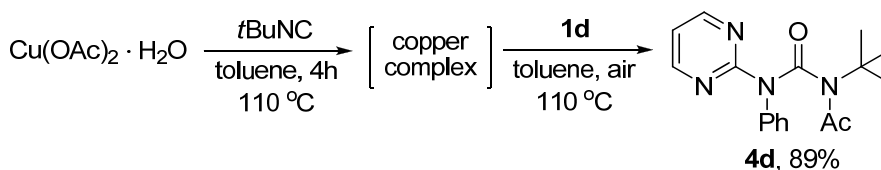

**Synthesis of copper complex from  $\text{Cu}(\text{OAc})_2$  and isocyanide.** To an oven-dried flask containing  $\text{Cu}(\text{OAc})_2 \cdot \text{H}_2\text{O}$  (399.3 mg, 2.0 mmol), *tert*-butyl isocyanide (277.2 mg, 3.0 mmol) was added in

toluene (3.0 mL). The reaction mixture was stirred at 110 °C for 4 h in the presence of air which was dried through a calcium chloride tube. Upon completion, filtrated the reaction and the filtrate was cooled to give a crystal. Filtrated to give the Cu(II) complex, which was used directly for next step without further purification.

Following the same procedure used for **4a** with **1d** (34.2 mg, 0.2 mmol) and Cu(II) complex (113.1 mg, 0.4 mmol) in toluene (1.8 mL). After 22 h at 110 °C, purification by column chromatography on silica gel yielded **4d** (55.8 mg, 89%) as a white solid.

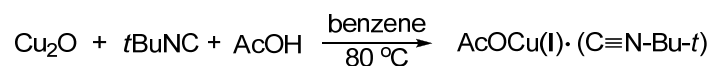

**Synthesis of Cu(I) complex [AcOCu(I)·(C≡N-Bu-t)].**<sup>[18]</sup> Under nitrogen, a mixture of acetic acid (17 mmol), Cu<sub>2</sub>O (8.5 mmol), and *t*-BuNC (17 mmol) was heated in 12 mL of benzene at 80 °C for 3 h. After filtration, the filtrate was subjected to evaporation in vacuo. Then benzene (10 mL) was added and recrystallization was carried out by warming the mixture up to 80 °C. The procedure was repeated for three times to give Cu(I) complex as a white solid. IR (KBr, cm<sup>-1</sup>): 2174, 1581, 1562, 1410; <sup>1</sup>H NMR (*d*<sub>6</sub>-DMSO, 500 MHz): δ 1.46 (s, 9H); <sup>13</sup>C NMR (*d*<sub>6</sub>-DMSO, 125 MHz): δ 57.1, 29.9.

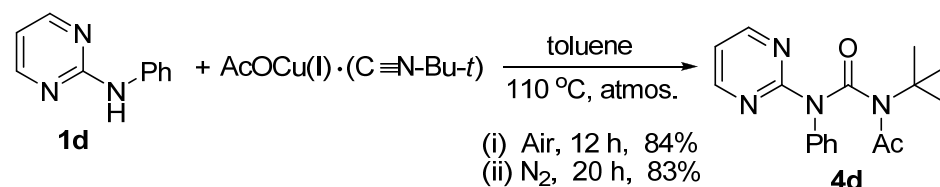

Following the same procedure used for **4a** with **1d** (34.2 mg, 0.2 mmol) and above prepared [AcOCu(I)·(C≡N-Bu-t)] (82.3 mg, 0.4 mmol) in toluene (1.2 mL) under air or N<sub>2</sub> atmosphere. After stirred at 110 °C, purification by column chromatography on silica gel yielded **4d** as a white solid in 84% and 83% yield, respectively.

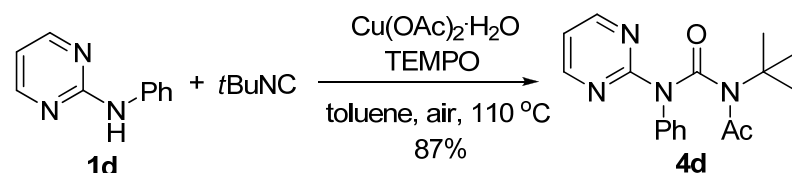

Following the same procedure as for **4a** with **1d** (85.5 mg, 0.5 mmol), Cu(OAc)<sub>2</sub>·H<sub>2</sub>O (199.7 mg, 1.0 mmol), *tert*-butyl isocyanide (131.3 mg, 1.5 mmol), TEMPO (78.2 mg, 0.5 mmol) in toluene for 16 h to give **4d** as white solid (135.6 mg, 87%).

## 7. X-ray crystal structure for compounds **4e**, **5g** and **5m**

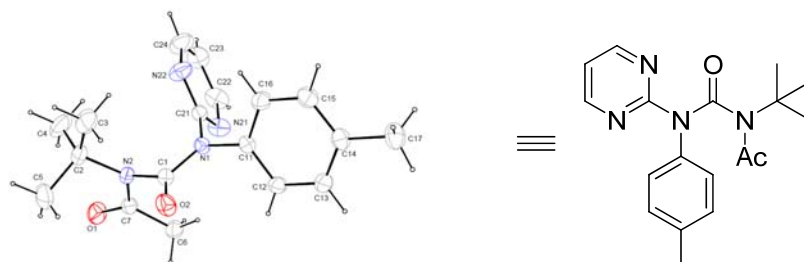

Crystallographic data for **4e**:  $C_{18}H_{22}N_4O_2$ ,  $M = 326.40$ , monoclinic,  $P 21/n$  (No. 14),  $a = 10.438$  (2) Å,  $b = 8.222$  (1) Å,  $c = 20.993$  (4) Å,  $\beta = 94.658(2)^\circ$ ,  $V = 1795.7$  (5) Å<sup>3</sup>,  $Z = 4$ , Crystal size:  $0.30 \times 0.25 \times 0.20$  mm,  $T = 295$  K,  $\rho_{\text{calcd}} = 1.207$  g·cm<sup>-3</sup>,  $R_1 = 0.0528$  ( $I > 4\sigma(I)$ ),  $wR_2 = 0.1700$  (all data),  $GOF = 1.046$ , reflections collected/unique: 4120 / 2824 ( $R_{\text{int}} = 0.0261$ ), Data: 2824, restraints: 0, parameters: 218. CCDC 882910 contains the supplementary crystallographic data for this paper. The data can be obtained free of charge from The Cambridge Crystallographic Data Centre via [www.ccdc.cam.ac.uk/data\\_request/cif](http://www.ccdc.cam.ac.uk/data_request/cif)

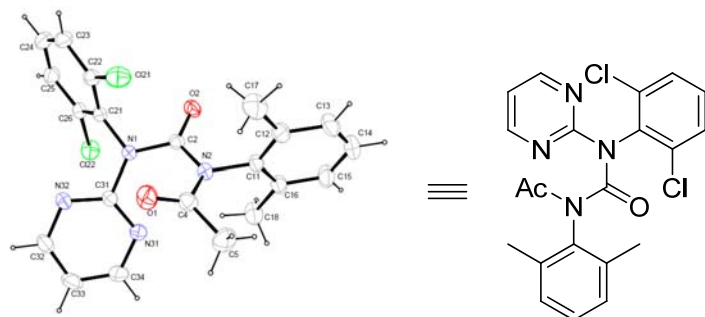

Crystallographic data for **5g**:  $C_{21}H_{18}Cl_2N_4O_2$ ,  $M = 429.29$ , monoclinic,  $P 21/c$  (No. 14),  $a = 15.245$  (5) Å,  $b = 8.417$  (5) Å,  $c = 16.508$  (5) Å,  $\beta = 104.637$  (5)<sup>o</sup>,  $V = 2049.5$  (15) Å<sup>3</sup>,  $Z = 4$ , Crystal size:  $0.30 \times 0.25 \times 0.20$  mm,  $T = 295$  K,  $\rho_{\text{calcd}} = 1.391$  g·cm<sup>-3</sup>,  $R_1 = 0.0421$  ( $I > 4\sigma(I)$ ),  $wR_2 = 0.1278$  (all data),  $GOF = 1.041$ , reflections collected/unique: 4697 / 3685 ( $R_{\text{int}} = 0.0200$ ), Data: 3685, restraints: 0, parameters: 262. CCDC 883162 contains the supplementary crystallographic data for this paper. The data can be obtained free of charge from The Cambridge Crystallographic Data Centre via [www.ccdc.cam.ac.uk/data\\_request/cif](http://www.ccdc.cam.ac.uk/data_request/cif).

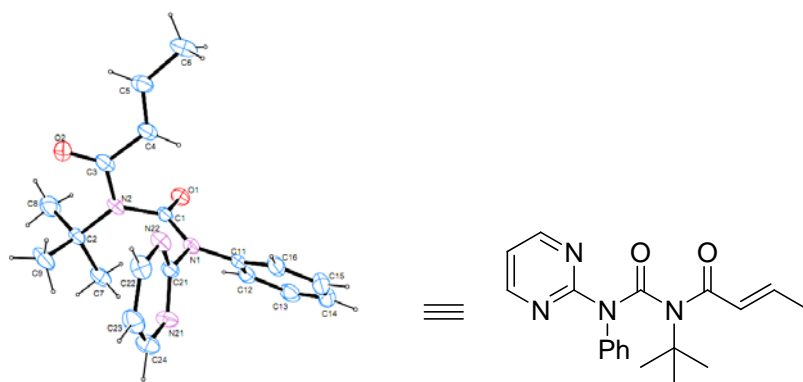

Crystallographic data for **5m**:  $C_{19}H_{22}N_4O_2$ ,  $M = 338.41$ , monoclinic,  $P 21/n$  (No. 14),  $a = 10.47$  (2) Å,  $b = 13.29$  (3) Å,  $c = 14.71$  (3) Å,  $\beta = 105.91$  (3)<sup>o</sup>,  $V = 1969$  (8) Å<sup>3</sup>,  $Z = 4$ , Crystal size:  $0.28 \times 0.25 \times 0.21$  mm,  $T = 295$  K,  $\rho_{\text{calcd}} = 1.142$  g·cm<sup>-3</sup>,  $R_1 = 0.1526$  ( $I > 4\sigma(I)$ ),  $wR_2 = 0.4040$  (all data),  $GOF = 1.223$ , reflections collected/unique: 8416 / 3226 ( $R_{\text{int}} = 0.0637$ ), Data: 3226, restraints: 0, parameters: 227. CCDC 888379 contains the supplementary crystallographic data for this paper. The data can be obtained free of charge from The Cambridge Crystallographic Data Centre via [www.ccdc.cam.ac.uk/data\\_request/cif](http://www.ccdc.cam.ac.uk/data_request/cif).

## 8. Reference

- [1] S. Jaime-Figueroa, Y. Liu, J. M. Muchowski and D. G. Putman, *Tetrahedron Lett.*, 1998, **39**, 1313.
- [2] H. P. L. Steenackers, *J. Med. Chem.*, 2010, **54**, 472.
- [3] L. Ackermann and A. V. Lygin, *Org. Lett.*, 2012, **14**, 764.
- [4] H. Takeuchi and K. Watanabe, *J. Phys. Org. Chem.*, 1998, 478.
- [5] R. Pierre, M. Florence, N. Romain, T. Jamal and G. Gilles, *Int. Patent*, WO 2010/143168A2, 2010.
- [6] E. Andre, *DE Patent*, DE 1978/2739659A1, 1978.
- [7] G. John, B. S. Armen, M. Allison, K. Tomas, F. K. Chiu, S. Jeongbeob, T. Hongqi, B. James and K. Kevin, *Int. Patent*, WO 2007/146824A2, 2007.
- [8] M. Colombo, M. Giglio and I. Peretto, *J. Heterocycl. Chem.*, 2008, **45**, 1077.
- [9] J. Chen, Q. Pang, Y. Sun and X. Li, *J. Org. Chem.*, 2011, **76**, 3523.
- [10] E. F. DiMauro, J. Newcomb, J. J. Nunes, J. E. Bemis, C. Boucher, J. L. Buchanan, W. H. Buckner, V. J. Cee, L. Chai, H. L. Deak, L. F. Epstein, T. Faust, P. Gallant, S. D. Geuns-Meyer, A. Gore, Y. Gu, B. Henkle, B. L. Hodous, F. Hsieh, X. Huang, J. L. Kim, J. H. Lee, M. W. Martin, C. E. Masse, D. C. McGowan, D. Metz, D. Mohn, K. A. Morgenstern, A. Oliveira-dos-Santos, V. F. Patel, D. Powers, P. E. Rose, S. Schneider, S. A. Tomlinson, Y.-Y. Tudor, S. M. Turci, A. A. Welcher, R. D. White, H. Zhao, L. Zhu and X. Zhu, *J. Med. Chem.*, 2006, **49**, 5671.
- [11] R. L. Martin and A. Whitley, *J. Chem. Soc.*, 1958, 1394.
- [12] M. Kondo and M. Kubo *J. Phys. Chem.*, 1958, **62**, 1558.
- [13] M. H. Borawska, P. Koczoń, J. Piekut, R. Świsłocka and W. Lewandowski, *J. Mol. Struct.*, 2009, **919**, 284.
- [14] M. Pereg, R. Baggio, R. P. Sartoris, R. C. Santana, O. Peña and R. Calvo, *Inorg. Chem.*, 2009, **49**, 695.
- [15] M. T. Rogers, *J. Am. Chem. Soc.*, 1947, **69**, 1506.
- [16] M. D. B. Drew, A. P. Mullins and D. A. Rice, *Polyhedron*, 1994, **13**, 1631.
- [17] B. Xu, X. M. Huang, X. H. Hong, G. Y. Qian, T. Fang and X. C. Xu, *Faming Zhuanli Shenqing*, CN 102718719 A 20121010, 2012.
- [18] T. Saegusa, I. Murase and Y. Ito, *J. Org. Chem.*, 1973, **38**, 1753.



HXM-2-2  
PROTON CDCl3 I

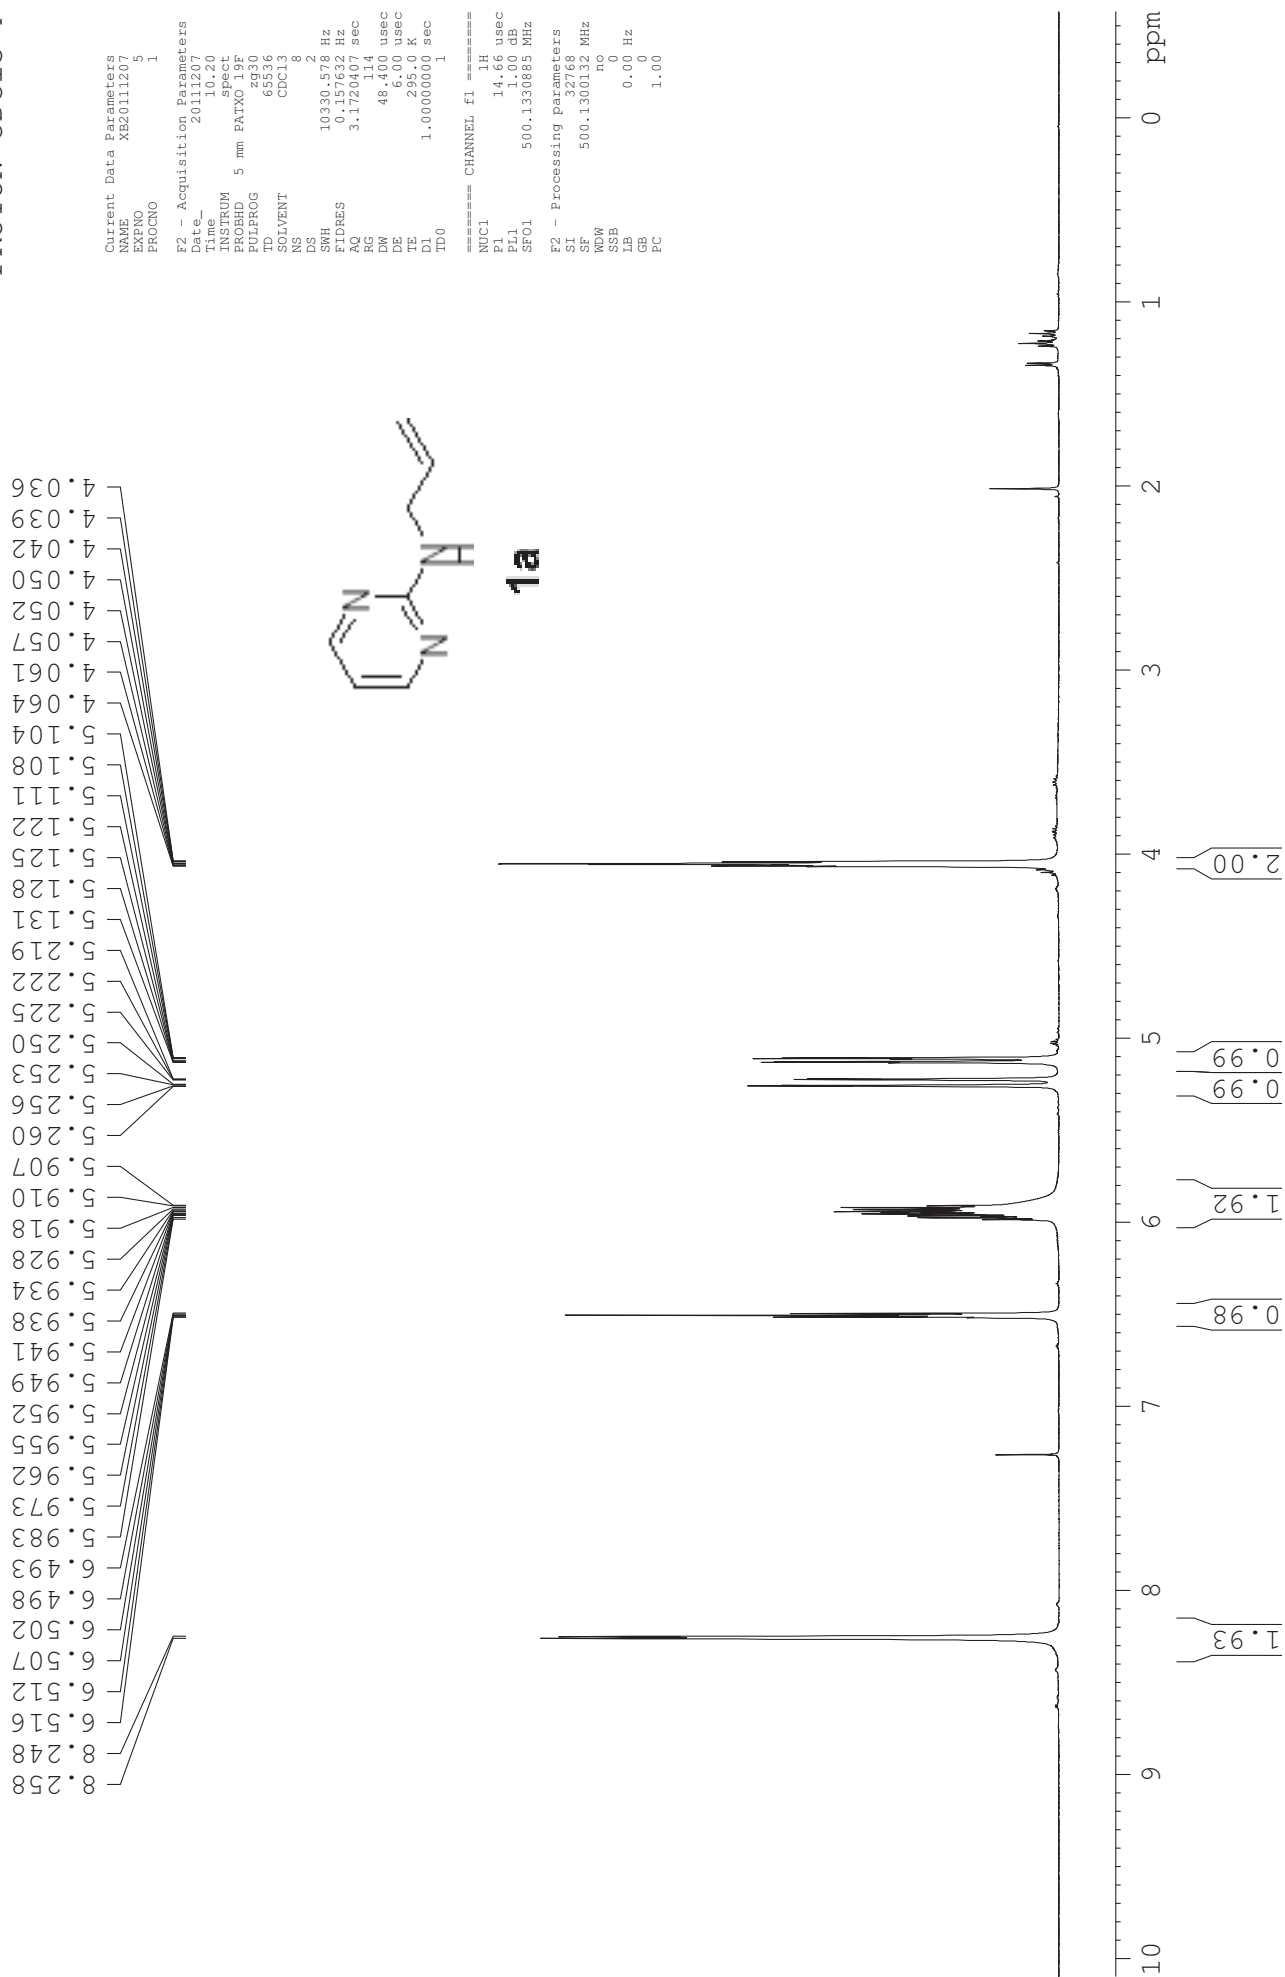

HXM-2-2  
C13CPD CDCl3

43.72

110.54

115.68

134.91

158.01

162.11

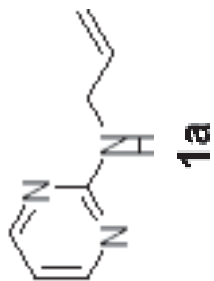

Current Data Parameters  
NAME XB2011208  
EXPNO 5  
PROCNO 1

F2 - Acquisition Parameters  
Date\_ 20111208  
Time 10.34  
INSTRUM spect  
PROBHD 5 mm PATYX19F  
PULPROG zgpg30  
TD 65536  
SOLVENT CDCl3  
NS 128  
DS 4  
SWH 30030.029 Hz  
FIDRES 0.458222 Hz  
AQ 1.0912410 sec  
RG 181  
DW 16.650 usec  
DE 6.00 usec  
TE 295.0 K  
D1 2.0000000 sec  
d11 0.0300000 sec  
DELTA 1.8999998 sec  
TD0 1

==== CHANNEL f1 =====  
NUC1 13C  
P1 9.50 usec  
PL1 -0.50 dB  
SFO1 125.7703643 MHz

==== CHANNEL f2 =====  
CPDPRG2 waltz16  
NUC2 1H  
PCPD2 80.00 usec  
PL2 2.00 dB  
PL12 16.50 dB  
PL13 16.50 dB  
SFO2 500.1320005 MHz

F2 - Processing parameters  
SI 32768  
SF 125.7577890 MHz  
WDW EM  
SSB 0  
LB 2.00 Hz  
GB 0  
PC 1.40

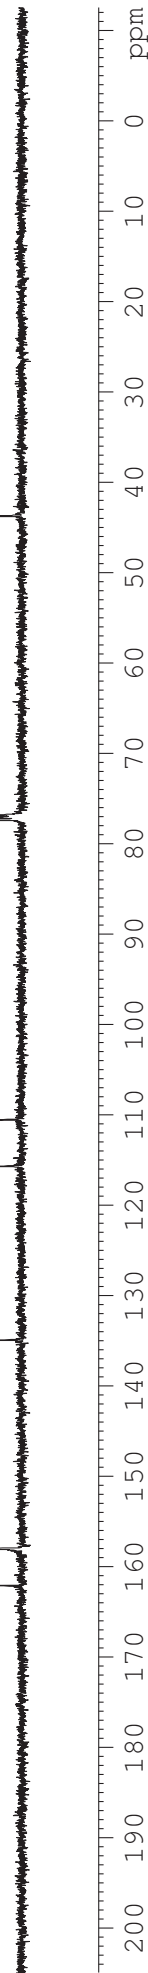

HXM-2-1  
PROTON CDC13

Current Data Parameters  
NAME XB20111207  
EXPNO 15  
PROCNO 1

F2 - Acquisition Parameters  
Date\_ 20111207  
Time 17.15  
INSTRUM spect  
PROBHD 5 mm PAXYO 19F  
PULPROG zg30  
TD 65536  
SOLVENT CDC13  
NS 16  
DS 2  
SWH 10330.578 Hz  
FIDRES 0.157632 Hz  
AQ 3.1720407 sec  
RG 228.1  
DW 48.400 usec  
DE 6.00 usec  
TE 293.7 K  
D1 1.0000000 sec  
TD0 1

==== CHANNEL f1 =====  
NUC1 1H  
P1 14.66 usec  
PL1 1.00 dB  
SFO1 500.1330885 MHz

F2 - Processing parameters  
SI 32768  
SF 500.1300131 MHz  
WDW no  
SSB 0  
LB 0.00 Hz  
GB 0  
PC 1.00

8.259  
6.515  
6.505  
6.496  
5.460  
3.419  
3.408  
3.405  
3.394  
3.391  
3.379  
1.619  
1.605  
1.600  
1.590  
1.585  
1.576  
1.560  
1.445  
1.430  
1.415  
1.400  
1.385  
1.377  
1.371  
1.371  
0.951  
0.936  
0.922

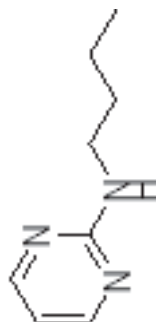

**1b**

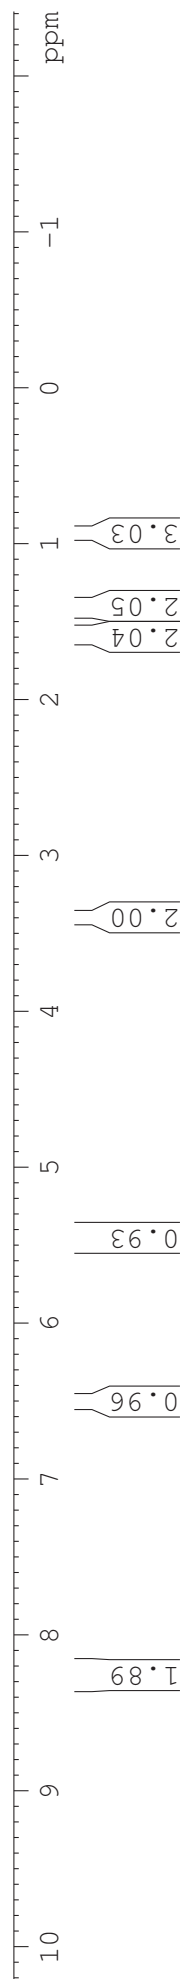

HXM-2-1  
C13CPD CDCl3

Current Data Parameters  
NAME XB20111207  
EXPNO 9  
PROCNO 1

F2 - Acquisition Parameters  
Date\_ 20111207  
Time 10:55  
INSTRUM spect  
PROBHD 5 mm PAXO 19f  
PULPROG zgpg30  
TD 65536  
SOLVENT CDCl3  
NS 128  
DS 4  
SWH 30030.029 Hz  
FIDRES 0.458222 Hz  
AQ 1.0912410 sec  
RG 181  
DW 16.650 usec  
DE 6.00 usec  
TE 295.6 K  
D1 2.0000000 sec  
d11 0.0300000 sec  
DELTA 1.8999998 sec  
TDO 1

==== CHANNEL f1 =====  
NUC1 13C  
PI 9.50 usec  
PL1 -0.50 dB  
SFO1 125.7703643 MHz

==== CHANNEL f2 =====  
CPDPRG2 waltz16  
NUC2 1H  
PCPD2 80.00 usec  
PL2 2.00 dB  
PL12 16.50 dB  
PL13 16.50 dB  
SFO2 500.1320005 MHz

F2 - Processing parameters  
SI 32768  
SF 125.7577890 MHz  
WDW no  
SSB 0  
LB 0.00 Hz  
GB 0  
PC 1.40

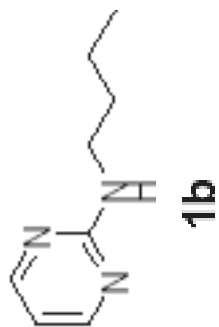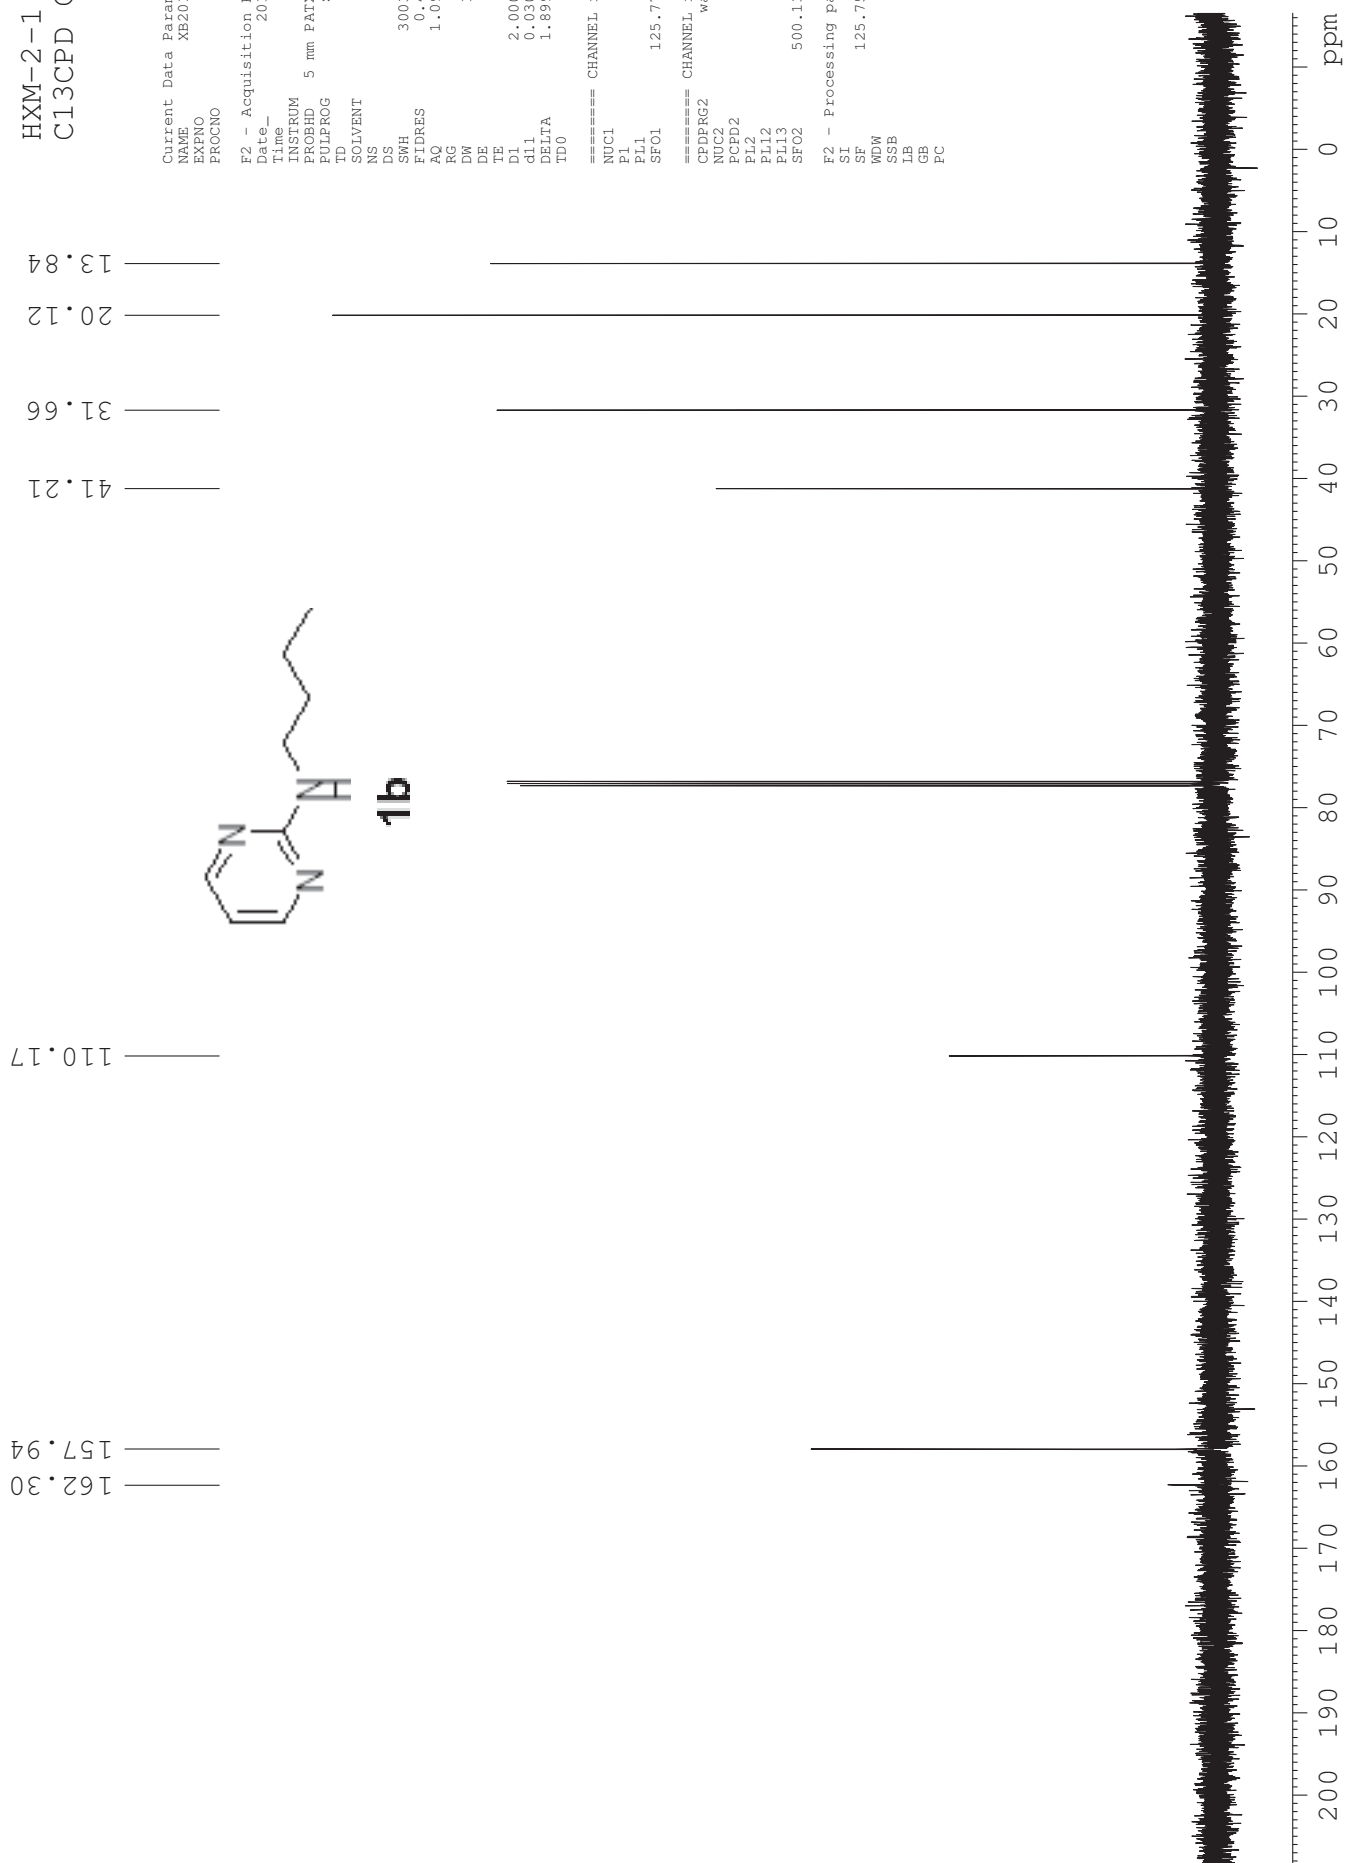

XSG-1-262  
PROTON CDCl3

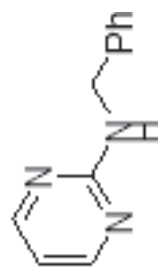

1c

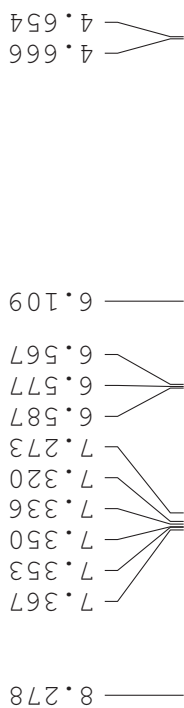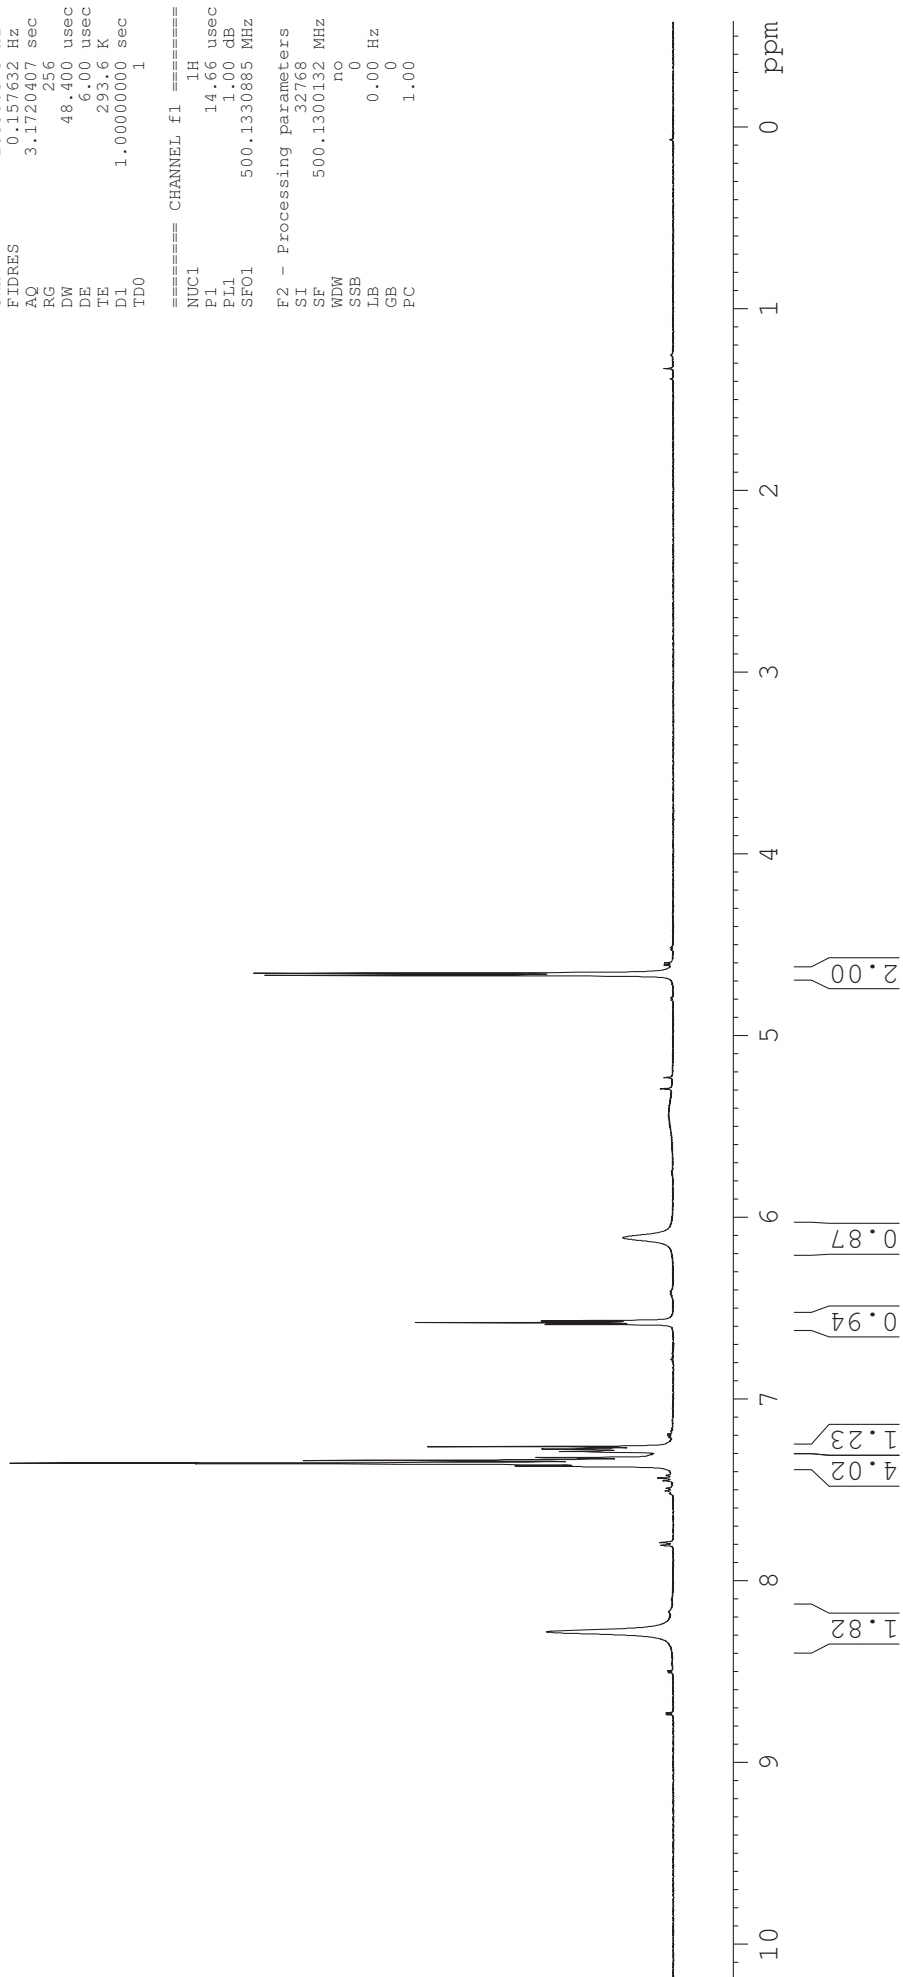

Current Data Parameters  
NAME XB20111212  
EXPNO 3  
PROCNO 1

F2 - Acquisition Parameters  
Date\_ 20111212  
Time 10.26  
INSTRUM spect  
PROBHD 5 mm PATXO 19F  
PULPROG zg30  
TD 65536  
SOLVENT CDCl3  
NS 16  
DS 2  
SWH 10330.578 Hz  
FIDRES 0.157632 Hz  
AQ 3.1720407 sec  
RG 256  
DM 48.400 usec  
DE 6.00 usec  
TE 293.6 K  
D1 1.00000000 sec  
TD0 1

==== CHANNEL f1 =====  
NUC1 1H  
PI 14.66 usec  
PL 1.00 dB  
SFO1 500.1330885 MHz

F2 - Processing parameters  
SI 32768  
SF 500.1300132 MHz  
WDW no  
SSB 0  
LB 0.00 Hz  
GB 0  
PC 1.00

XSG-1-262  
C13CPD CDC13

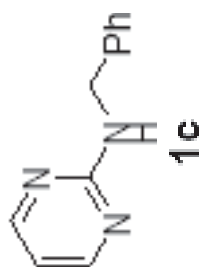

45.48

110.64

127.27

127.61

128.63

139.03

157.99

162.14

Current Data Parameters  
NAME XB2011212  
EXPNO 20  
PROCNO 1

F2 - Acquisition Parameters  
Date\_ 20111212  
Time\_ 17:27  
INSTRUM spect  
PROBHD 5 mm PATXO 19F  
PULPROG zgpg30  
TD 65536  
SOLVENT CDC13  
NS 128  
DS 4  
SWH 30030.029 Hz  
FIDRES 0.458222 Hz  
AQ 1.0912410 sec  
RG 181  
DW 16.650 usec  
DE 6.00 usec  
TE 295.2 K  
D1 2.0000000 sec  
d11 0.0300000 sec  
DELTA 1.8999998 sec  
TD0 1

==== CHANNEL f1 =====  
NUC1 13C  
P1 9.50 usec  
PL1 -0.50 dB  
SFO1 125.7703643 MHz

==== CHANNEL f2 =====  
CPDPRG2 waitz16  
NUC2 1H  
PCPD2 80.00 usec  
PL2 2.00 dB  
PL12 16.50 dB  
PL13 16.50 dB  
SFO2 500.1320005 MHz

F2 - Processing parameters  
SI 32768  
SF 125.7577890 MHz  
WDW no  
SSB 0  
LB 0.00 Hz  
GB 0  
PC 1.40

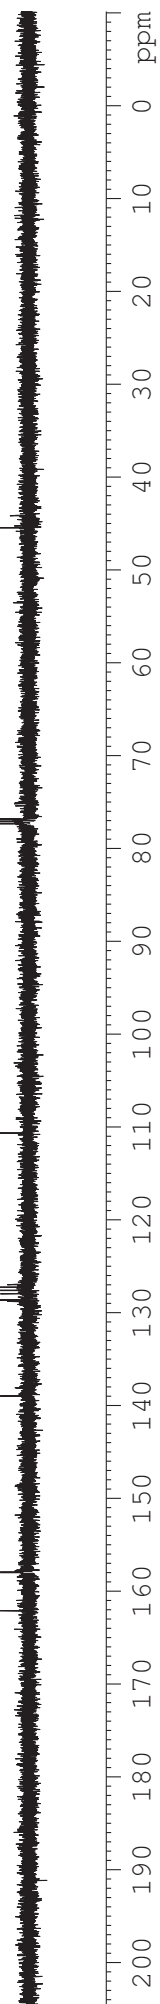

QGY-1-31  
PROTON CDCl3

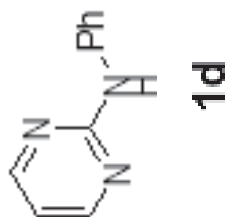

8.435  
8.425  
7.709  
7.629  
7.612  
7.367  
7.351  
7.336  
7.083  
7.068  
7.053  
6.740  
6.730  
6.720

Current Data Parameters  
NAME XB20111212  
EXPNO 9  
PROCNO 1

F2 - Acquisition Parameters  
Date\_ 20111212  
Time 11.01  
INSTRUM spect  
PROBHD 5 mm PAXY019F  
PULPROG zg30  
TD 65536  
SOLVENT CDCl3  
NS 16  
DS 2  
SWH 10330.578 Hz  
FIDRES 0.35578 Hz  
AQ 3.1720407 sec  
RG 256  
DW 48.400 usec  
DE 6.00 usec  
TE 293.6 K  
D1 1.00000000 sec  
TD0 1

==== CHANNEL f1 =====  
NUC1 1H  
P1 14.66 usec  
PL1 1.00 dB  
SFO1 500.1330885 MHz

F2 - Processing parameters  
SI 32768  
SF 500.1300133 MHz  
WDW EM  
SSB 0  
LB 0.30 Hz  
GB 0  
FC 1.00

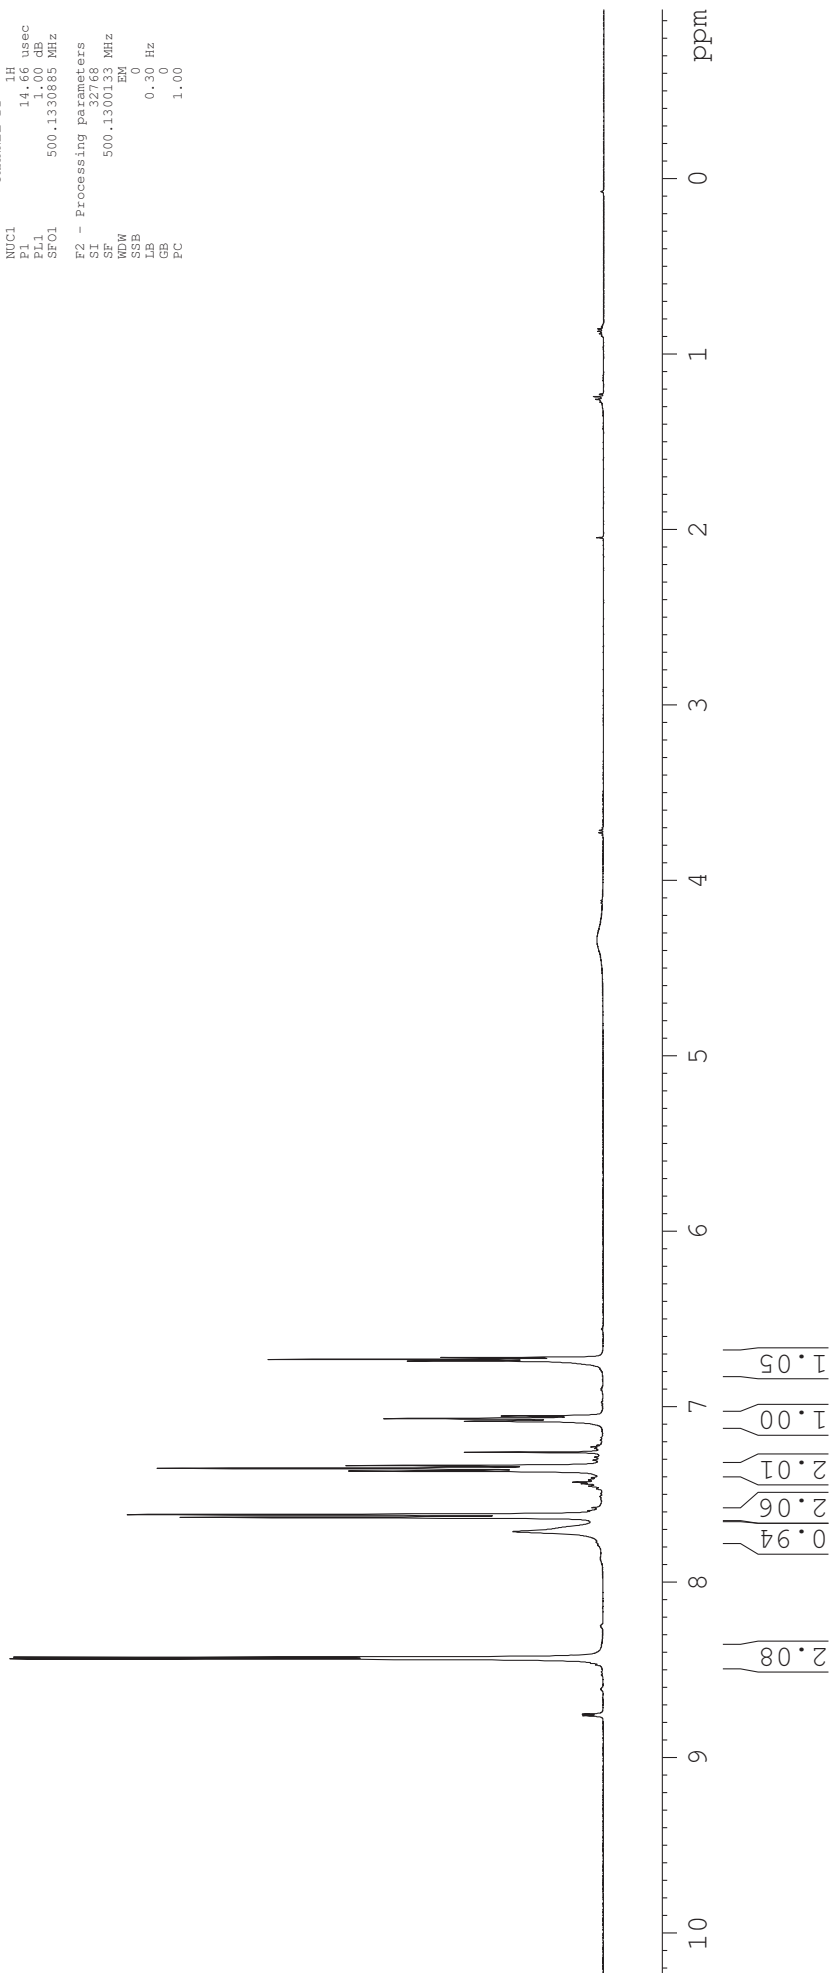

QGY-1-31  
C13CPD CDC13

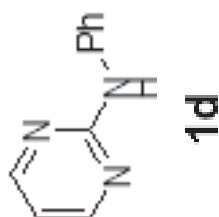

160.21  
158.02  
139.43  
128.99  
122.86  
119.79  
112.42

Current Data Parameters  
NAME XB20111212  
EXPNO 18  
PROCNO 1

F2 - Acquisition Parameters  
Date\_ 20111212  
Time\_ 17.02  
INSTRUM spect  
PROBHD 5 mm PATXO 19F  
PULPROG zgpg30  
ID 65336  
SOLVENT CDC13  
NS 128  
DS 4  
SWH 30030.029 Hz  
FIDRES 0.458222 Hz  
AQ 1.0912410 sec  
RG 161.3  
DW 16.650 usec  
DE 6.00 usec  
TE 294.9 K  
D1 2.00000000 sec  
d11 0.03000000 sec  
DELTA 1.89999998 sec  
TD0 1

==== CHANNEL f1 =====  
NUC1 13C  
P1 9.50 usec  
PL1 -0.50 dB  
SFO1 125.7703643 MHz

==== CHANNEL f2 =====  
CPDPRG2 wait416  
NUC2 1H  
PCPD2 80.00 usec  
PL2 2.00 dB  
PL12 16.50 dB  
PL13 16.50 dB  
SFO2 500.1320005 MHz

F2 - Processing parameters  
SI 32768  
SF 125.7577890 MHz  
WDW EM  
SSB 0  
LB 1.00 Hz  
GB 0  
PC 1.40

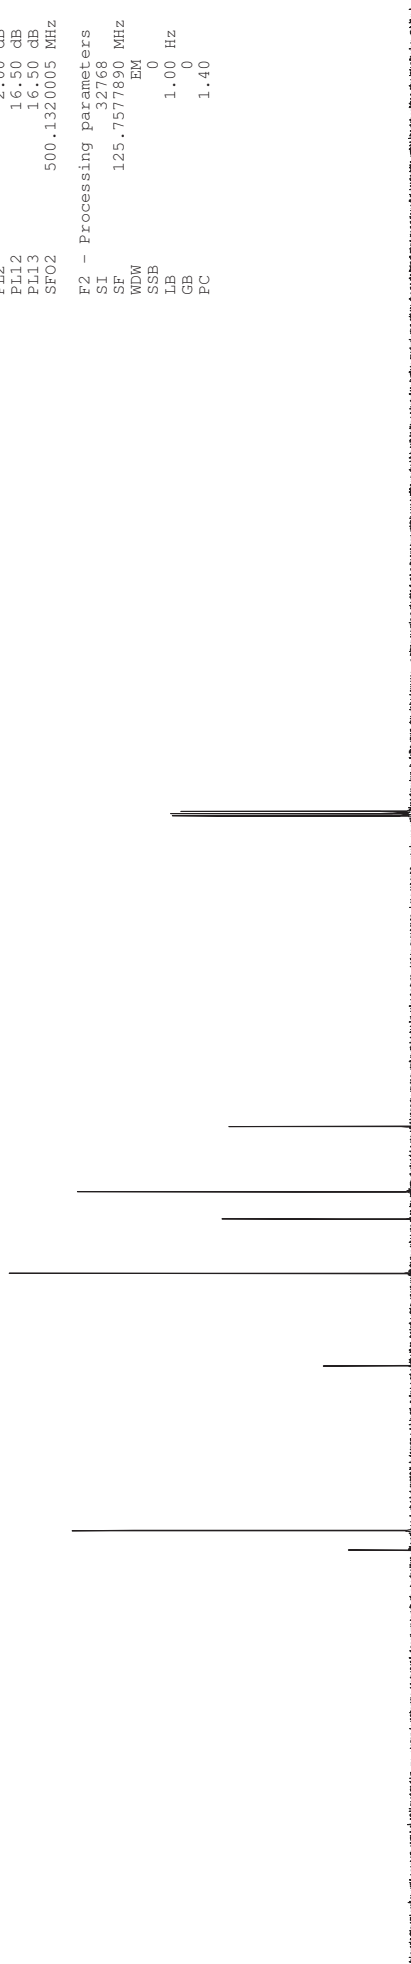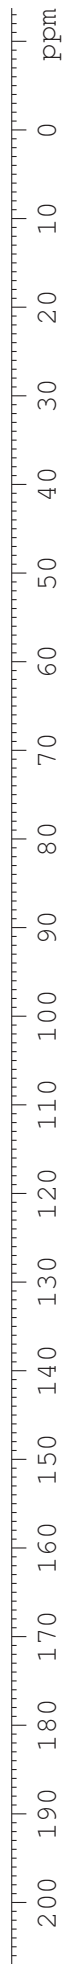



HXM-2-5  
PROTON CDC13

Current Data Parameters  
NAME XE20111207  
EXPNO 7  
PROCNO 1  
F2 - Acquisition Parameters  
Date\_ 20111207  
Time 10.30  
INSTRUM spect  
PROBHD 5 mm PAXIO 19f  
PULPROG zgpg30  
TD 65536  
SOLVENT CDC13  
NS 8  
DS 2  
SWH 10330.578 Hz  
FIDRES 0.157632 Hz  
AQ 3.1720407 sec  
RG 114  
DW 48.400 usec  
DE 6.00 usec  
TE 300.2 K  
D1 1.00000000 sec  
TD0 1  
===== CHANNEL f1 =====  
NUC1 1H  
P1 14.66 usec  
PL1 1.00 dB  
SFO1 500.1330885 MHz  
F2 - Processing parameters  
SI 32768  
SF 500.1300129 MHz  
WDW no  
SSB 0  
LB 0.00 Hz  
GB 0  
PC 1.00

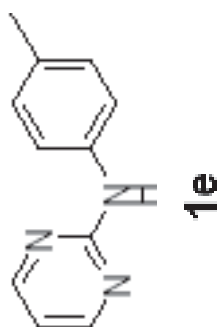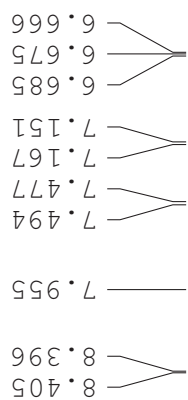

2.333

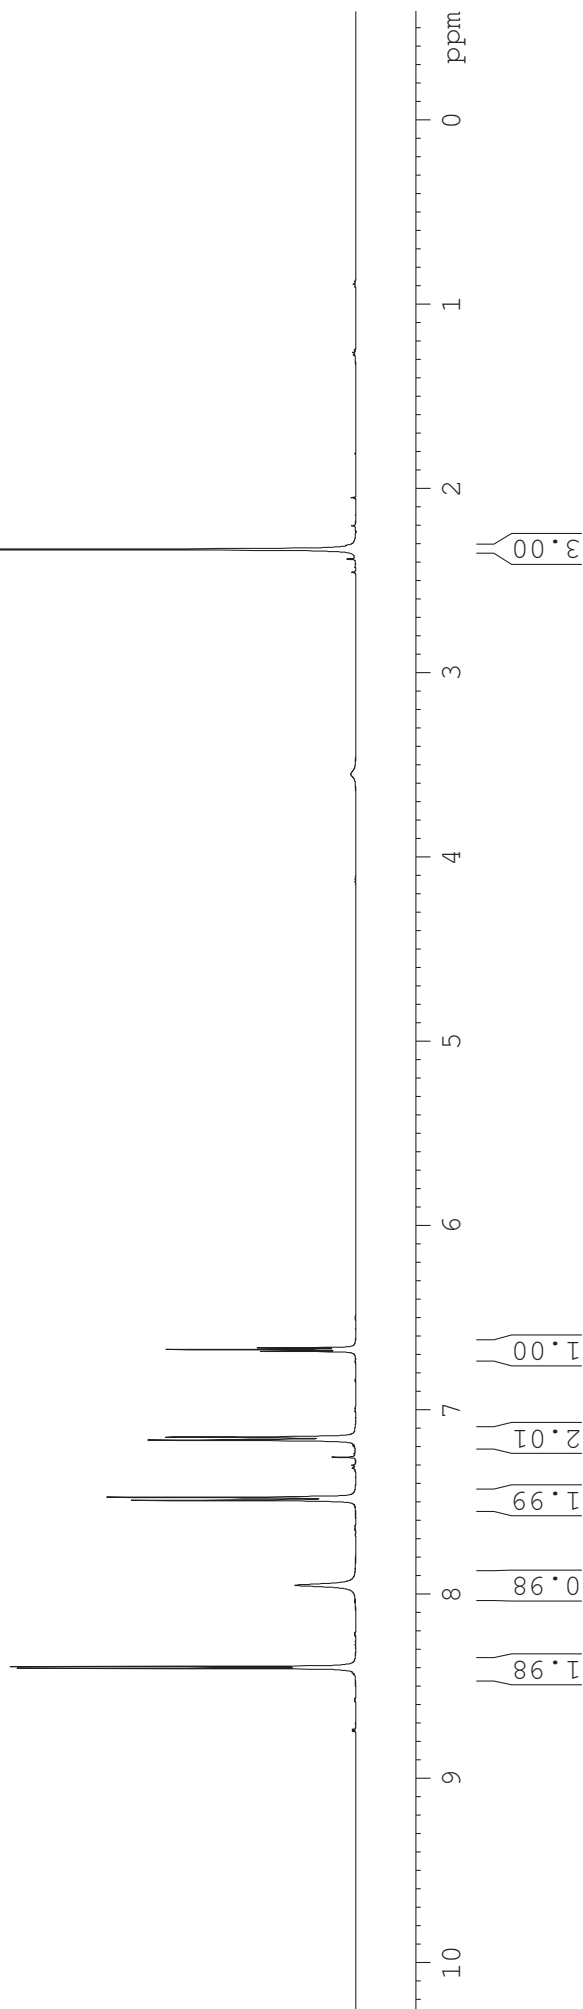

HXM-2-5  
C13CPD CDCl3 I

20.87

Current Data Parameters  
NAME XE20111207  
EXPNO 11  
PROCNO 1

F2 - Acquisition Parameters  
Date\_ 20111207  
Time 11.20  
INSTRUM spect  
PROBHD 5 mm PATXO 19F  
PULPROG zgpg30  
TD 65536  
SOLVENT CDCl3  
NS 128  
DS 4  
SWH 30030.022 Hz  
FIDRES 0.468222 Hz  
AQ 1.0912410 sec  
RG 181  
DM 16.650 usec  
DE 6.00 usec  
TE 295.5 K  
D1 2.00000000 sec  
d11 0.03000000 sec  
DELTA 1.89999998 sec  
TD0 1

===== CHANNEL f1 =====  
NUC1 <sup>13</sup>C  
P1 9.50 usec  
PL1 0.50 dB  
SFO1 125.7703645 MHz

===== CHANNEL f2 =====  
CPDPRG2 waltz16  
NUC2 <sup>1</sup>H  
PCPD2 80.00 usec  
PL2 2.00 dB  
PL12 16.50 dB  
PL13 16.50 dB  
SFO2 500.1320005 MHz

F2 - Processing parameters  
SI 32768  
SF 125.7577890 MHz  
WDW no  
SSB 0  
GB 0.00 Hz  
PC 1.40

112.10

120.31

129.50

132.61

136.72

158.01

160.41

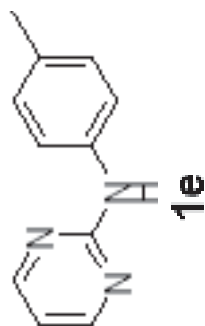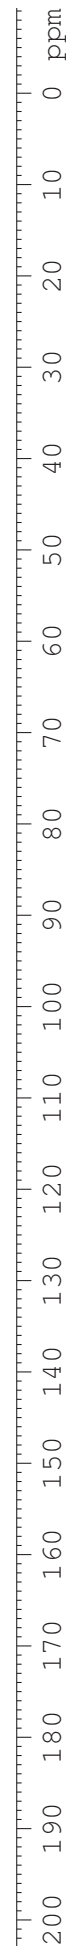

HXM-2-3  
PROTON CDCl3

NAME XB20111207  
EXPNO 6  
PROCNO 1  
Date\_ 20111207  
Time 10.25  
INSTRUM spect  
PROBHD 5 mm PATXO 19F  
PULPROG zg30  
TD 65536  
SOLVENT CDCl3  
NS 8  
DS 2  
SWH 10330.578 Hz  
FIDRES 0.157632 Hz  
AQ 3.1720407 sec  
RG 143.7  
DW 48.400 usec  
DE 6.00 usec  
TE 294.7 K  
D1 1.00000000 sec  
TD0 1  
===== CHANNEL f1 =====  
NUC1 1H  
P1 14.66 usec  
PL1 1.00 dB  
SFO1 500.1330885 MHz  
SI 32768  
SF 500.1300130 MHz  
WDW no  
SSB 0  
LB 0.00 Hz  
GB 0  
PC 1.00

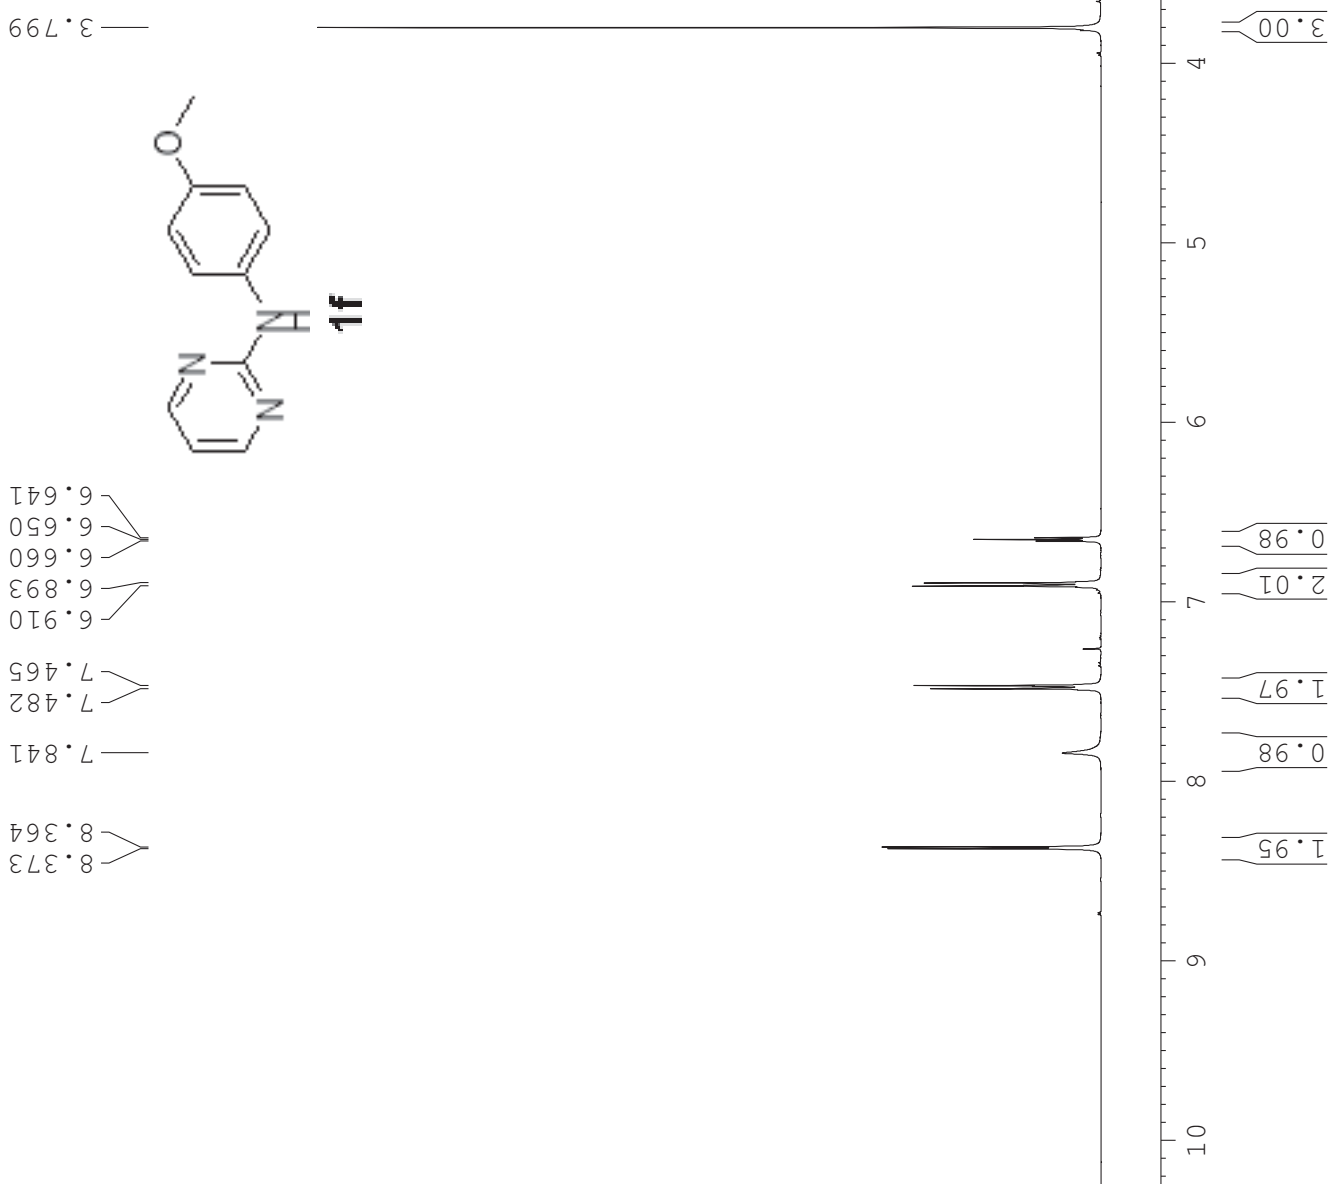

HXM-2-3  
C13CPD CDCl3

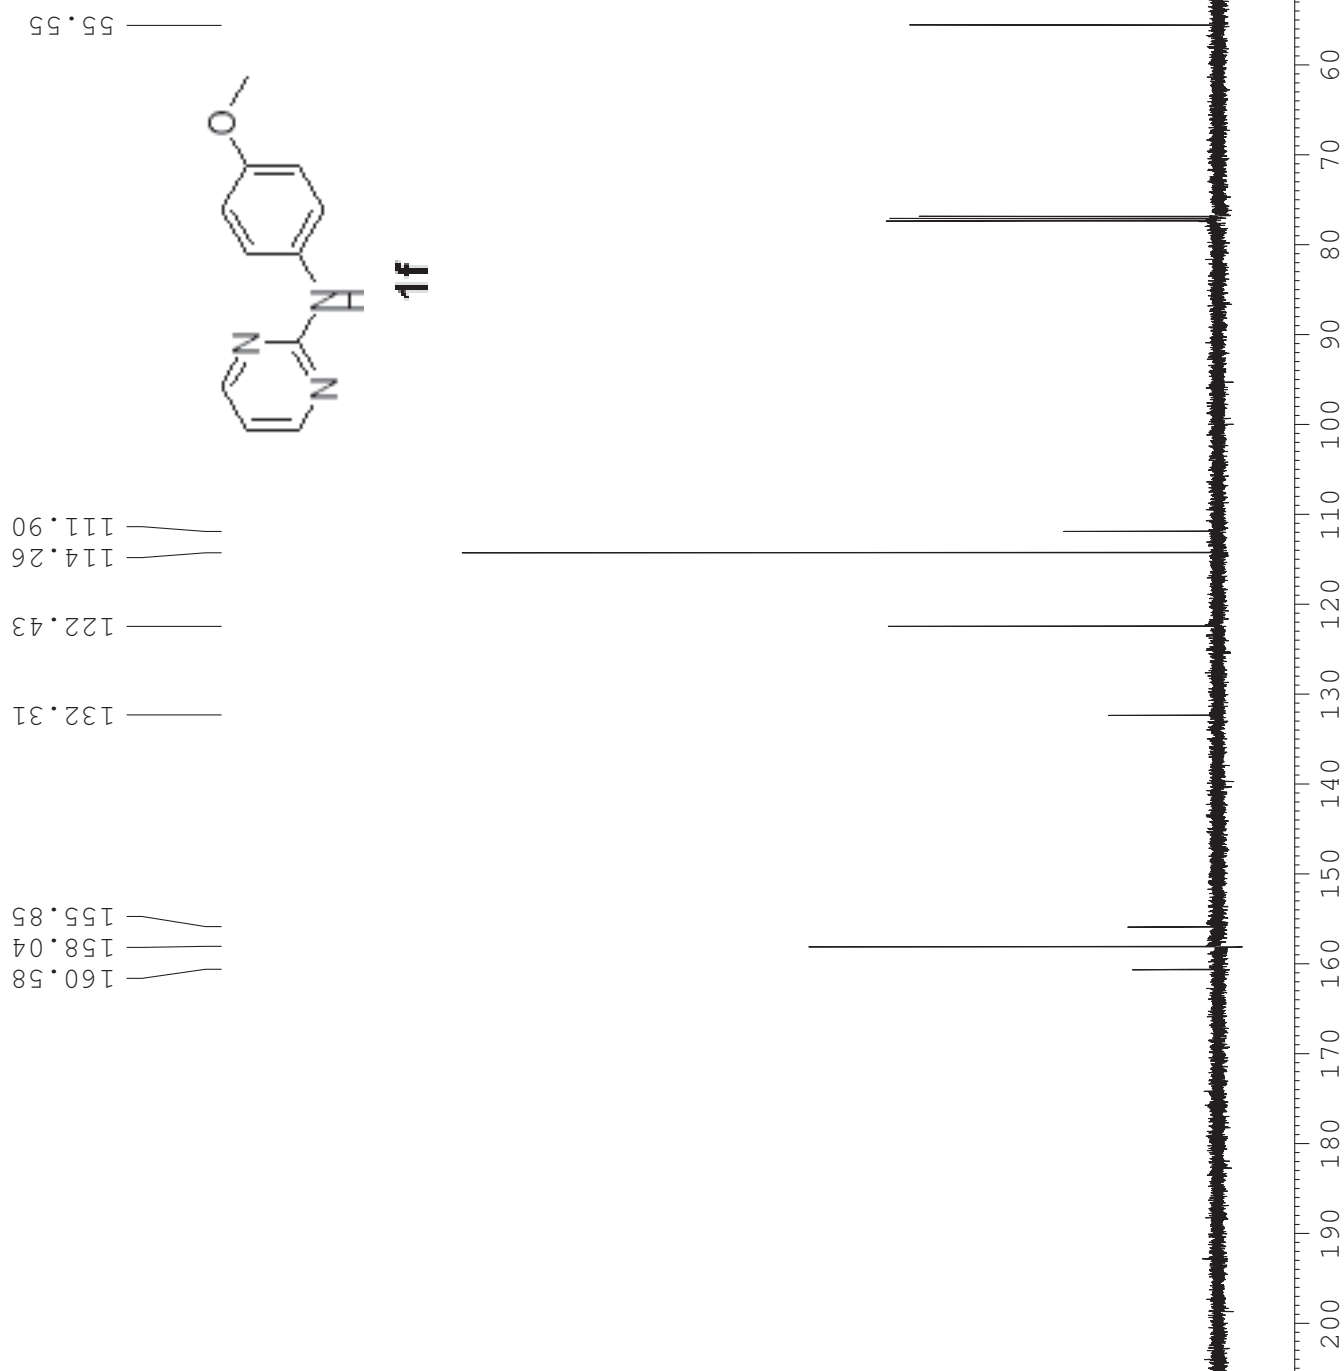

```
Current Data Parameters
NAME      AB20111207
EXPNO    10
PROCNO   1

F2 - Acquisition Parameters
Date_    20111207
Time     11.07
INSTRUM  spect
PROBHD   5 mm PAXO 13F
PULPROG  zgpg30
SOLVENT  CDCl3
NS       128
DS       4
SWH      30030.029 Hz
FIDRES   0.458222 Hz
AQ       1.0912410 sec
RG       161.3
DW       16.650 usec
DE       6.00 usec
TE       270.6 K
D1       2.00000000 sec
d11      0.03000000 sec
DELTA    1.89999998 sec
TD0      1

===== CHANNEL f1 =====
NUC1     13C
P1       9.50 usec
PL1     -0.50 dB
SFO1    125.7703643 MHz

===== CHANNEL f2 =====
CPDPRG2  waltz16
NUC2     1H
PCPD2    80.00 usec
PL2     2.00 dB
PL12    16.50 dB
PL13    16.50 dB
SFO2    500.1320005 MHz

F2 - Processing Parameters
SI       32768
SF       125.7577890 MHz
WDW      no
SSB      0
LB       0.00 Hz
GB       0
PC       1.40
```

QGY-1-49  
PROTON CDC13

NAME XB20111226  
EXPNO 3  
PROCNO 1  
Date\_ 20111226  
Time 10.23  
INSTRUM spect  
PROBHD 5 mm PATXO 19F  
PULPROG zg30  
TD 65536  
SOLVENT CDC13  
NS 16  
DS 2  
SWH 10330.578 Hz  
FIDRES 0.157632 Hz  
AQ 3.1720407 sec  
RG 287.4  
DW 48.400 usec  
DE 6.00 usec  
TE 293.6 K  
D1 1.00000000 sec  
TDO 1

==== CHANNEL f1 =====  
NUC1 1H  
P1 14.66 usec  
PL1 1.00 dB  
SFO1 500.1330885 MHz  
SI 32768  
SF 500.1300129 MHz  
WDW no  
SSB 0  
LB 0.00 Hz  
GB 0  
PC 1.00

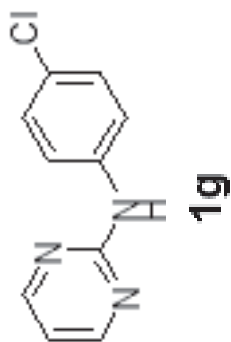

8.434  
8.425  
7.616  
7.588  
7.571  
7.304  
7.287  
6.769  
6.759  
6.749

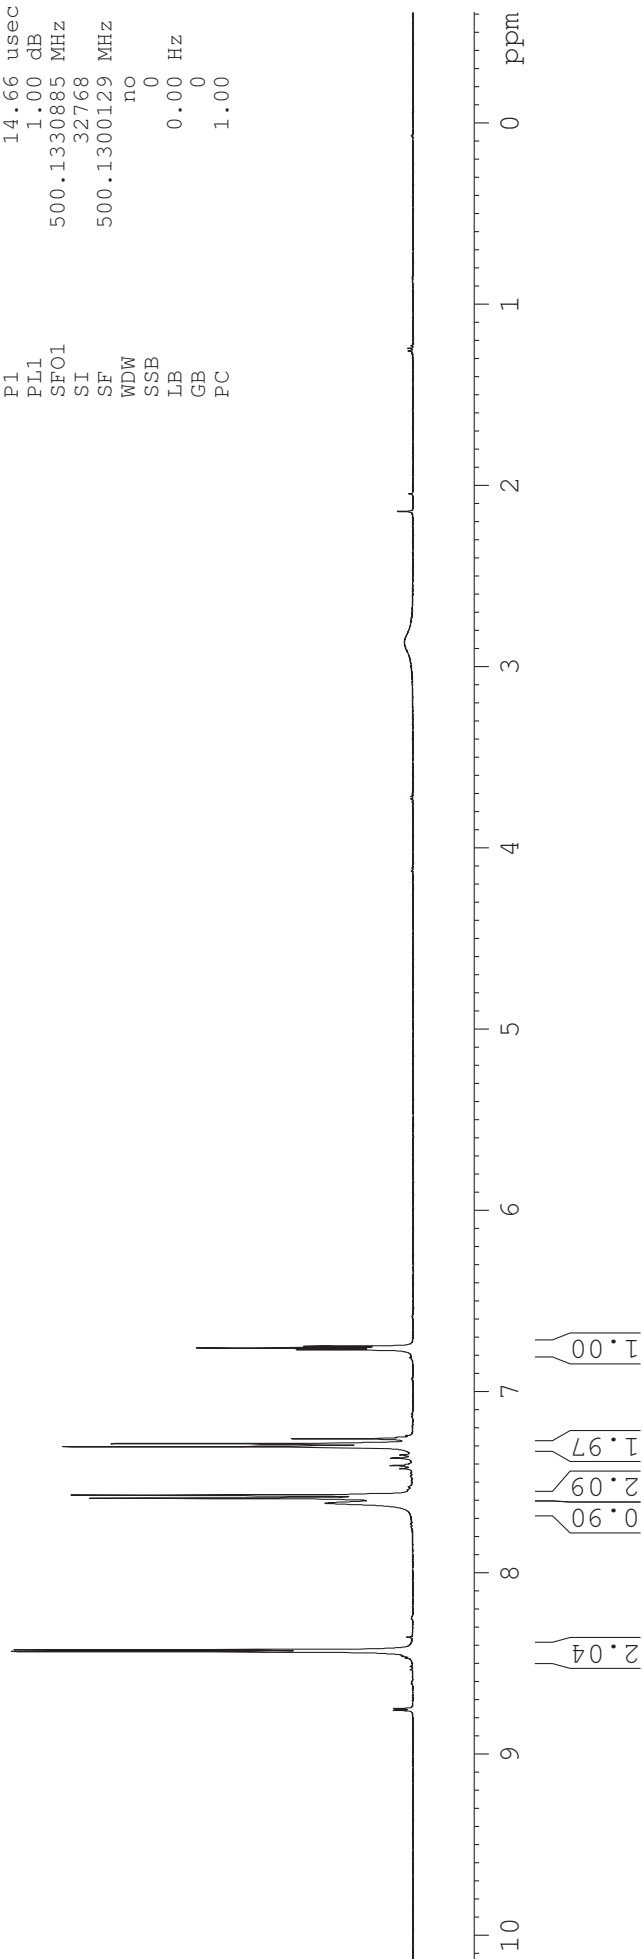

QGY-1-49  
C13CPD CDC13

NAME XB20111227  
EXPNO 9  
PROCNO 1  
Date\_ 20111227  
Time 15.00  
INSTRUM spect  
PROBHD 5 mm PATXO 19F  
PULPROG zgpg30  
TD 65536  
SOLVENT CDC13  
NS 128  
DS 4  
SWH 30030.029 Hz  
FIDRES 0.458222 Hz  
AQ 1.0912410 sec  
RG 161.3  
DW 16.650 usec  
DE 6.00 usec  
TE 295.1 K  
D1 2.0000000 sec  
d11 0.0300000 sec  
DELTA 1.89999998 sec  
TD0 1

==== CHANNEL f1 =====  
NUC1 13C  
P1 9.50 usec  
PL1 -0.50 dB  
SFO1 125.7703643 MHz

==== CHANNEL f2 =====  
CPDPRG2 waltz16  
NUC2 1H  
PCPD2 80.00 usec  
PL2 2.00 dB  
PL12 16.50 dB  
PL13 16.50 dB  
SFO2 500.1320005 MHz  
SI 32768  
SF 125.7577890 MHz  
WDW EM  
SSB 0  
LB 1.00 Hz  
GB 0

159.70  
157.96  
137.85  
128.92  
127.64  
120.74  
112.78

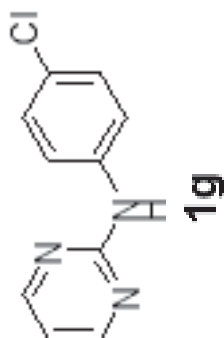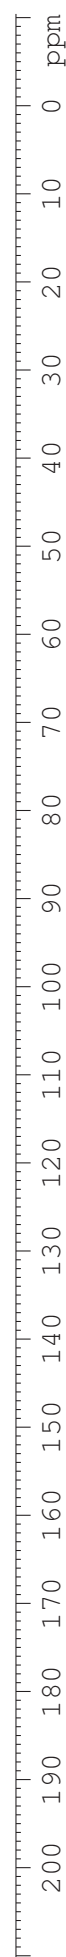

FT-1-30  
PROTON CDCl3

NAME XB20111229  
EXPNO 4  
PROCNO 1  
Date\_ 20111229  
Time 10.28  
INSTRUM spect  
PROBHD 5 mm PATXO 19F  
PULPROG zg30  
TD 65536  
SOLVENT CDCl3  
NS 16  
DS 2  
SWH 10330.578 Hz  
FIDRES 0.157632 Hz  
AQ 3.1720407 sec  
RG 256  
DW 48.400 usec  
DE 6.00 usec  
TE 293.9 K  
D1 1.00000000 sec  
TD0 1

===== CHANNEL f1 =====  
NUC1 1H  
P1 14.66 usec  
PL1 1.00 dB  
SFO1 500.1330885 MHz  
SI 32768  
SF 500.1300130 MHz  
WDW no  
SSB 0  
LB 0.00 Hz  
GB 0  
PC 1.00

2.370

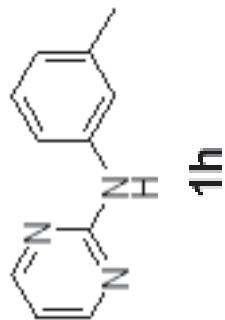

8.426  
8.416  
7.492  
7.439  
7.422  
7.415  
7.250  
7.234  
7.219  
6.896  
6.880  
6.728  
6.718  
6.708

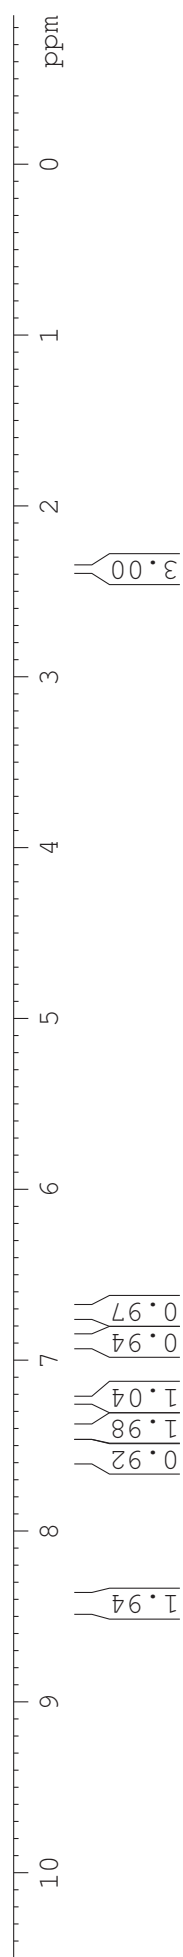

FT-1-30  
C13CPD CDCl3

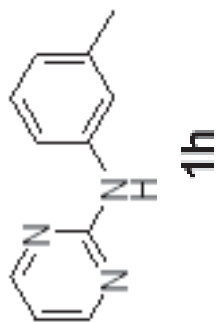

160.25  
158.00  
139.29  
138.80  
128.82  
123.76  
120.40  
116.94  
112.32

21.65

NAME XB20111230  
EXPNO 4  
PROCNO 1  
Date\_ 20111230  
Time\_ 10.32  
INSTRUM spect  
PROBHD 5 mm PAXO 19F  
PULPROG zgpg30  
TD 65536  
SOLVENT CDCl3  
NS 128  
DS 4  
SWH 30030.029 Hz  
FIDRES 0.458222 Hz  
AQ 1.0912410 sec  
RG 161.3  
DW 16.650 usec  
DE 6.00 usec  
TE 295.2 K  
D1 2.00000000 sec  
d11 0.03000000 sec  
DELTA 1.89999998 sec  
TD0 1

=====  
CHANNEL f1  
NUC1 13C  
P1 9.50 usec  
PL1 -0.50 dB  
SFO1 125.7703643 MHz

=====  
CHANNEL f2  
CPDPRG2 waltz16  
NUC2 1H  
PCPD2 80.00 usec  
PL2 2.00 dB  
PL12 16.50 dB  
PL13 16.50 dB  
SFO2 500.1320005 MHz  
SI 32768  
SF 125.7577890 MHz  
WDW no  
SSB 0  
LB 0.00 Hz  
GB 0  
PC 1.40

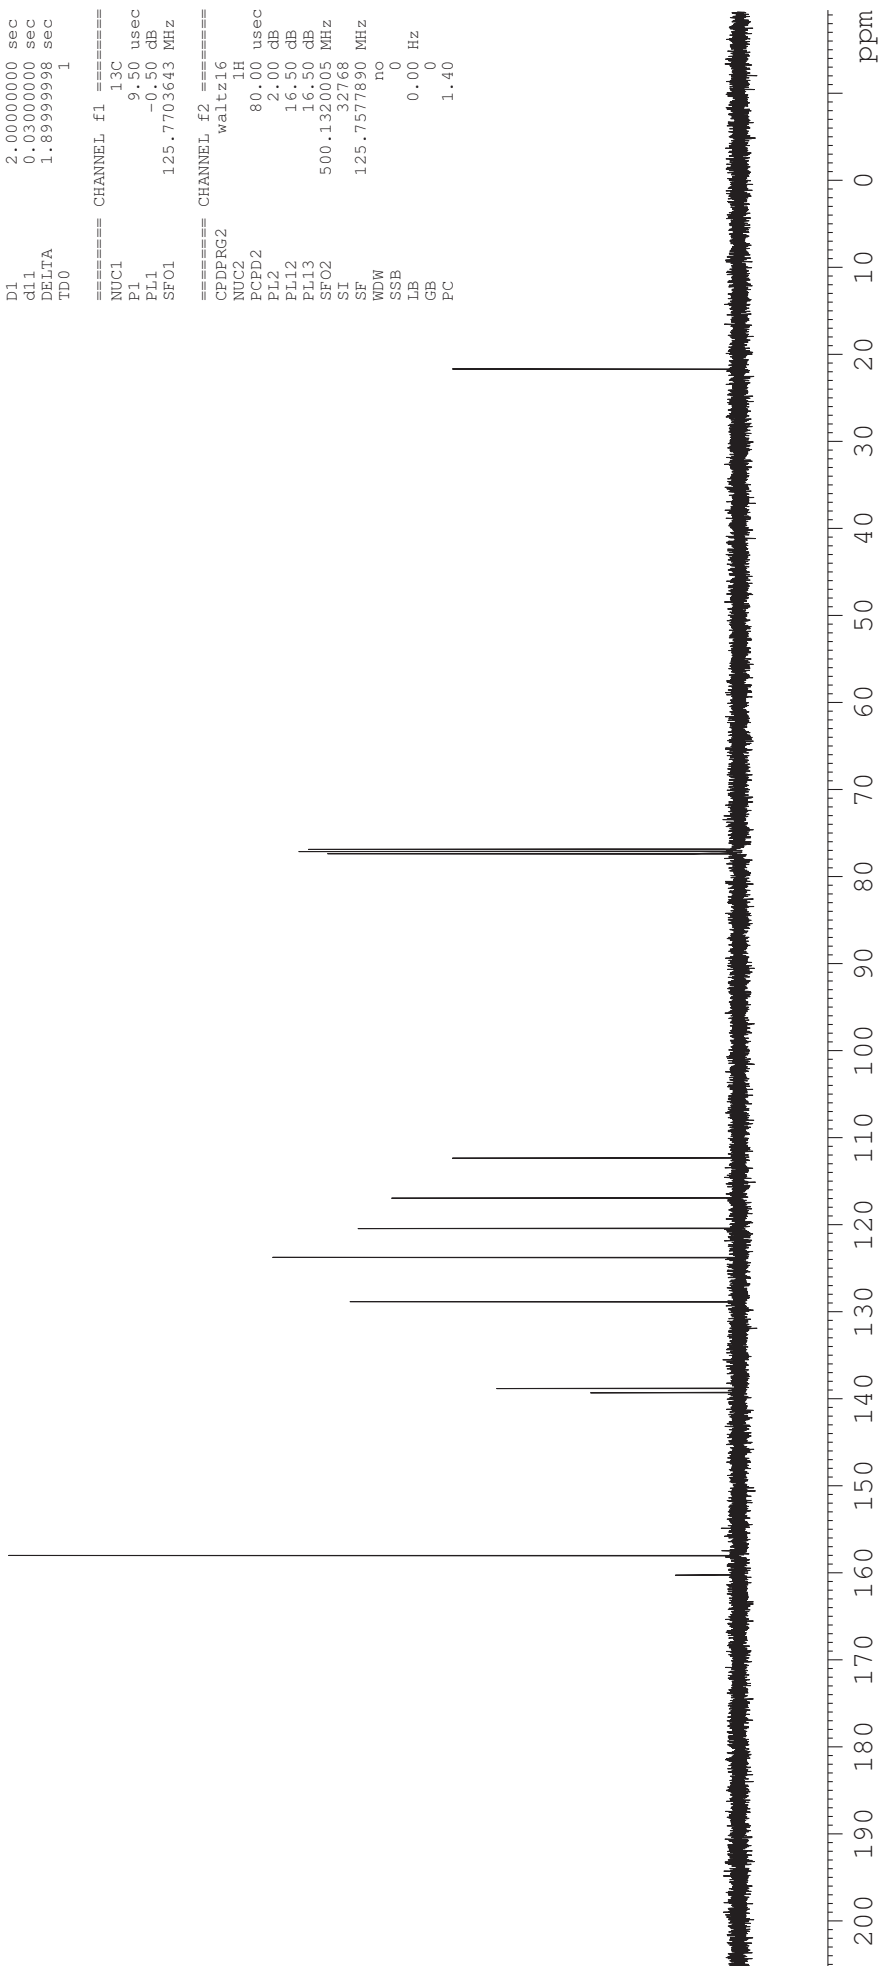



QGY-1-78-a  
PROTON CDCl3

NAME XB20120229  
EXPNO 1  
PROCNO 1  
Date\_ 20120229  
Time\_ 14.11  
INSTRUM spect  
PROBHD 5 mm PATXO 19F  
PULPROG zg30  
TD 65536  
SOLVENT CDCl3  
NS 16  
DS 2  
SWH 10330.578 Hz  
FIDRES 0.157632 Hz  
AQ 3.1720407 sec  
RG 322.5  
DW 48.400 usec  
DE 6.00 usec  
TE 293.7 K  
D1 1.00000000 sec  
TD0 1  
===== CHANNEL f1 =====  
NUC1 1H  
P1 13.70 usec  
PL1 1.00 dB  
SFO1 500.1330885 MHz  
SI 32768  
SF 500.1300132 MHz  
WDW no  
SSB 0  
LB 0.00 Hz  
GB 0  
PC 1.00

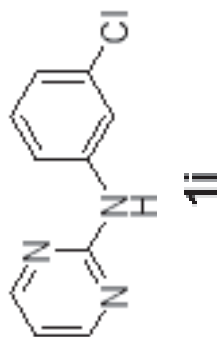

8.463  
8.454  
7.856  
7.734  
7.734  
7.404  
7.388  
7.260  
7.245  
7.229  
7.030  
7.014  
6.796  
6.787  
6.777

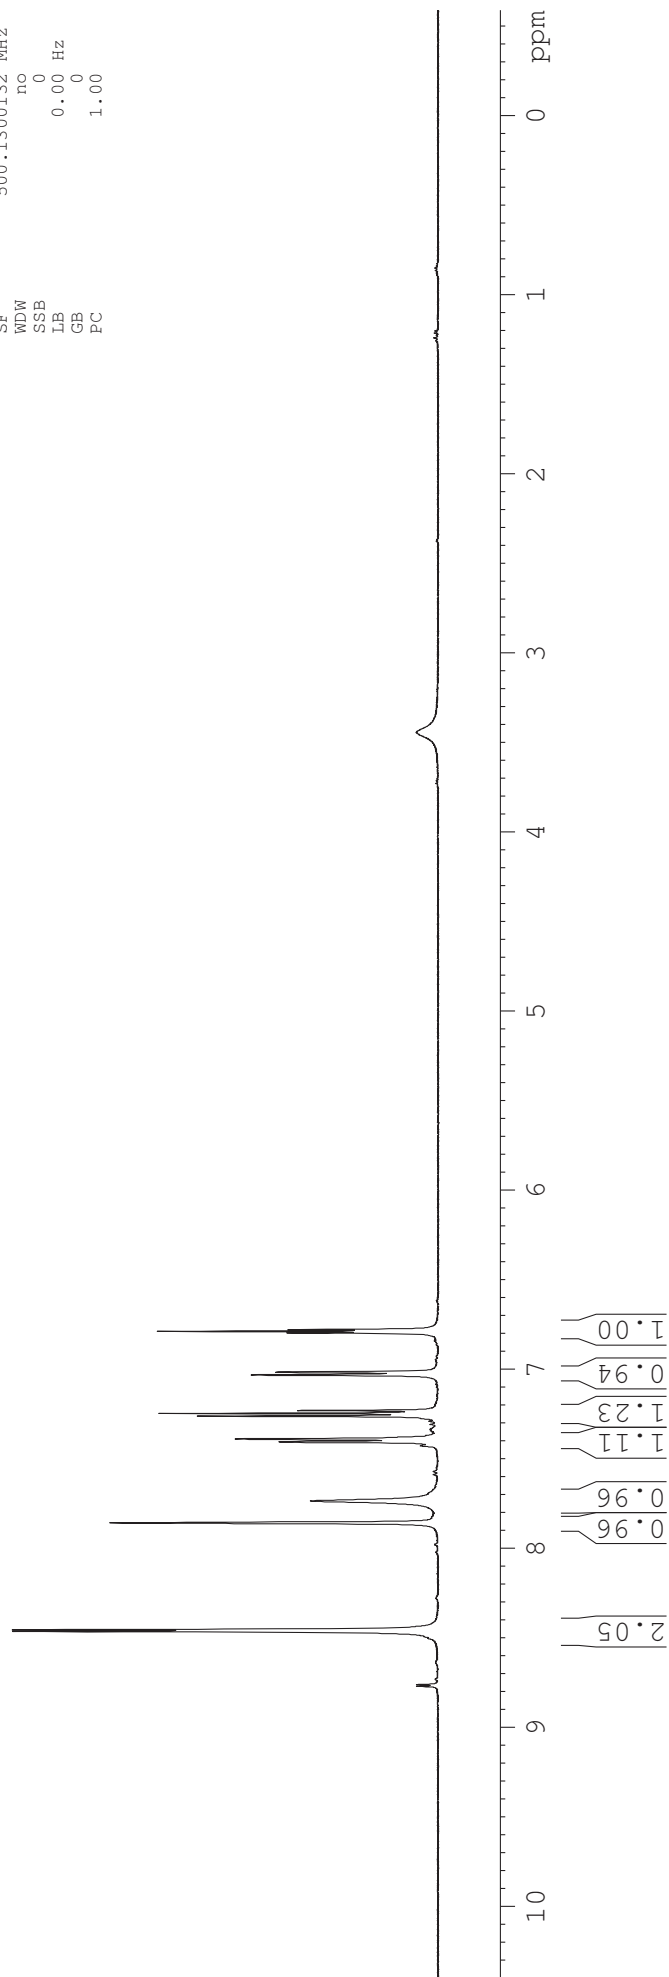

QGY-1-78-a  
C13CPD CDCl3

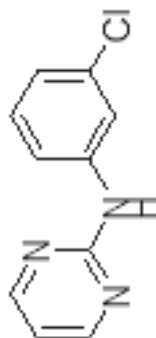

11

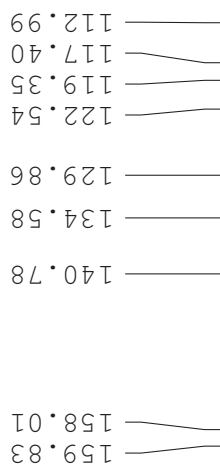

Current Data Parameters  
NAME XB20120301  
EXENO 9  
PROCNO 1

F2 - Acquisition Parameters  
Date\_ 20120301  
Time\_ 19.12  
INSTRUM spect  
PROBHD 5 mm PAXO 19F  
PULPROG zgpg30  
TD 65536  
SOLVENT CDCl3  
NS 128  
DS 4  
SWH 30030.029 Hz  
FIDRES 0.458222 Hz  
AQ 1.0912410 sec  
RG 114  
DM 16.650 usec  
DE 6.00 usec  
TE 295.4 K  
D1 2.00000000 sec  
d11 0.03000000 sec  
DELTA 1.89999998 sec  
TD0 1

==== CHANNEL f1 =====  
NUC1 13C  
P1 9.50 usec  
PL1 -0.50 dB  
SFO1 125.7703643 MHz

==== CHANNEL f2 =====  
CPDPRG2 waltz16  
NUC2 1H  
PCPD2 80.00 usec  
PL2 1.00 dB  
PL12 16.33 dB  
PL13 16.50 dB  
SFO2 500.1320005 MHz

F2 - Processing parameters  
SI 32768  
SF 125.7577890 MHz  
WDW no  
SSB 0  
LB 0.00 Hz  
GB 0  
FC 1.40

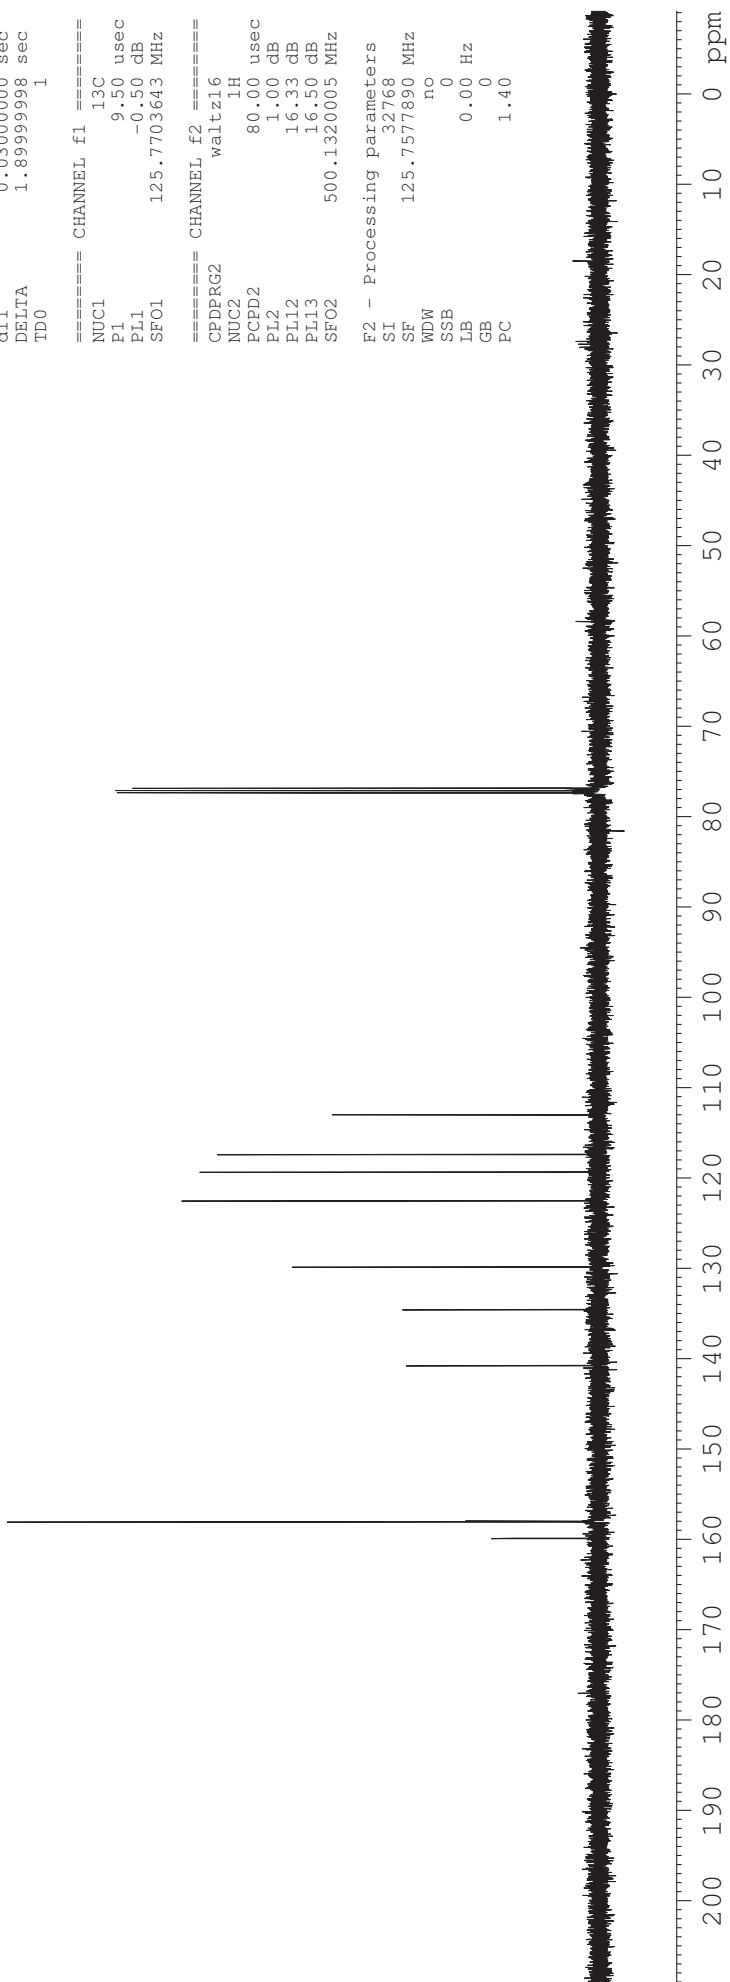

QGY-1-44  
 PROTON CDCl3

NAME XB20120216  
 EXPNO 1  
 PROCNO 1  
 Date\_ 20120216  
 Time 9.36  
 INSTRUM spect  
 PROBHD 5 mm PAXO 19F  
 PULPROG zg30  
 TD 65536  
 SOLVENT CDCl3  
 NS 16  
 DS 2  
 SWH 10330.578 Hz  
 FIDRES 0.157632 Hz  
 AQ 3.1720407 sec  
 RG 322.5  
 DW 48.400 usec  
 DE 6.00 usec  
 TE 293.5 K  
 D1 1.00000000 sec  
 TD0 1

==== CHANNEL f1 =====  
 NUC1 1H  
 P1 13.65 usec  
 PL1 1.00 dB  
 SFO1 500.1330885 MHz  
 SI 32768  
 SF 500.1300130 MHz  
 WDW EM  
 SSB 0  
 LB 0.30 Hz  
 GB 0  
 PC 1.00

8.409  
 8.399  
 7.898  
 7.882  
 7.260  
 7.249  
 7.238  
 7.224  
 7.088  
 7.074  
 7.059  
 6.726  
 6.716  
 6.706

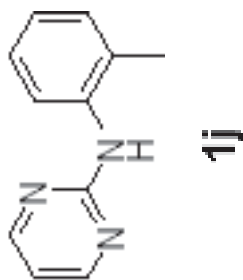

2.330

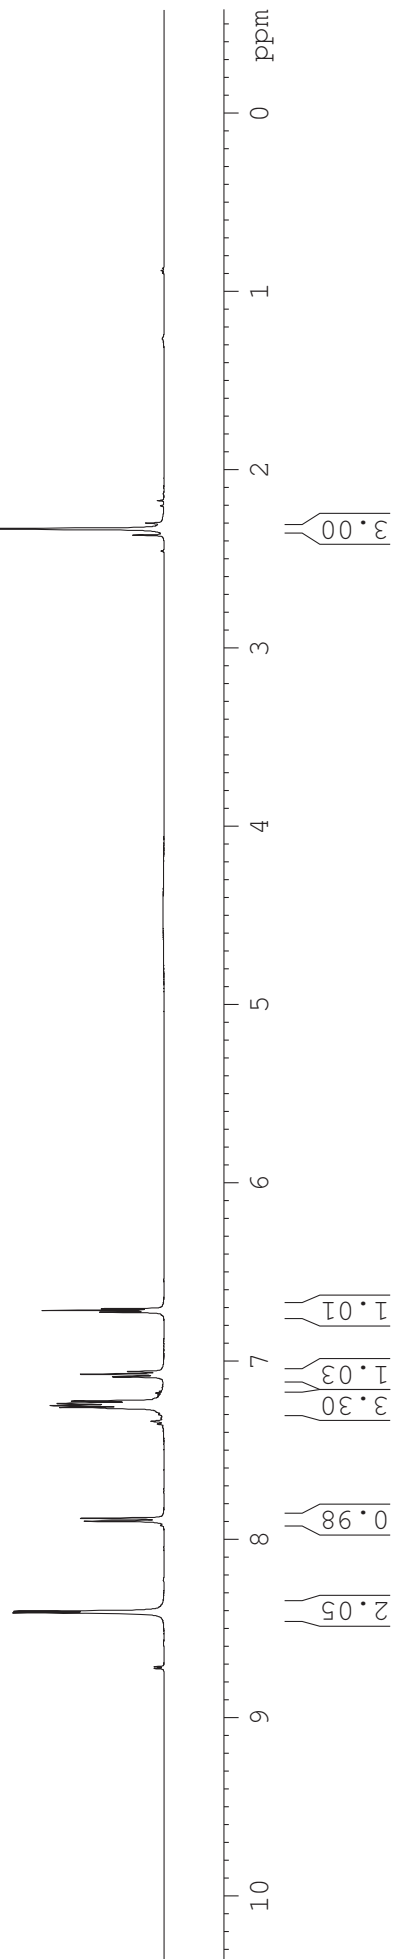

QGY-1-44  
C13CPD CDC13

18.16

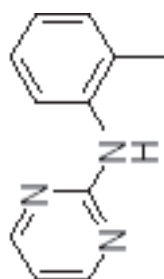

160.61  
158.11  
137.14  
130.64  
129.77  
126.66  
124.33  
122.69  
112.20

NAME XB20120221  
EXPNO 6  
PROCNO 1  
Date\_ 20120221  
Time 18.13  
INSTRUM spect  
PROBHD 5 mm PATXO 19F  
PULPROG zgpg30  
TD 65536  
SOLVENT CDCl3  
NS 128  
DS 4  
SWH 30030.029 Hz  
FIDRES 0.458222 Hz  
AQ 1.0912410 sec  
RG 203.2  
DW 16.650 usec  
DE 6.00 usec  
TE 295.4 K  
D1 2.00000000 sec  
d11 0.03000000 sec  
DELTA 1.89999998 sec  
TD0 1

==== CHANNEL f1 =====  
NUC1 13C  
P1 9.50 usec  
PL1 -0.50 dB  
SFO1 125.7703643 MHz  
  
==== CHANNEL f2 =====  
CPDPRG2 waltz16  
NUC2 1H  
PCPD2 80.00 usec  
PL2 2.00 dB  
PL12 16.77 dB  
PL13 16.50 dB  
SFO2 500.1320005 MHz  
SI 32768  
SF 125.7577890 MHz  
WDW no  
SSB 0  
LB 0.00 Hz  
GB 0  
PC 1.40

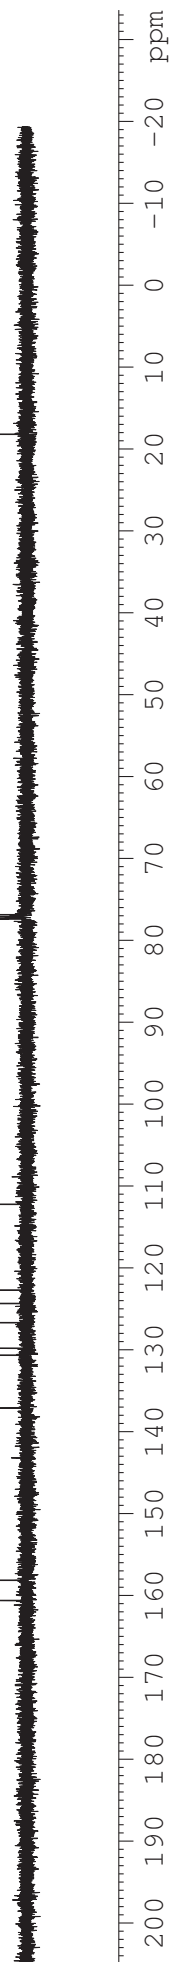

QGY-1-45  
PROTON CDCl3

```
NAME      XB20111226
EXPNO     2
PROCNO    1
Date_     20111226
Time      10.17
INSTRUM   spect
PROBHD    5 mm PATXO 19F
PULPROG   zg30
TD         65536
SOLVENT   CDCl3
NS         16
DS         2
SWH        10330.578 Hz
FIDRES     0.157632 Hz
AQ         3.1720407 sec
RG         287.4
DW         48.400 usec
DE         6.00 usec
TE         293.7 K
D1         1.00000000 sec
TD0        1

===== CHANNEL f1 =====
NUC1       1H
P1         14.66 usec
PL1        1.00 dB
SFO1       500.1330885 MHz
SI         32768
SF         500.1300130 MHz
WDW        no
SSB        0
LB         0.00 Hz
GB         0
PC         1.00
```

3.906

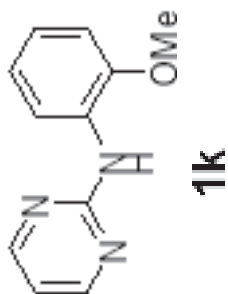

8.447  
8.437  
8.421  
8.048  
7.011  
7.005  
6.997  
6.995  
6.918  
6.911  
6.909  
6.904  
6.899  
6.741  
6.731  
6.721

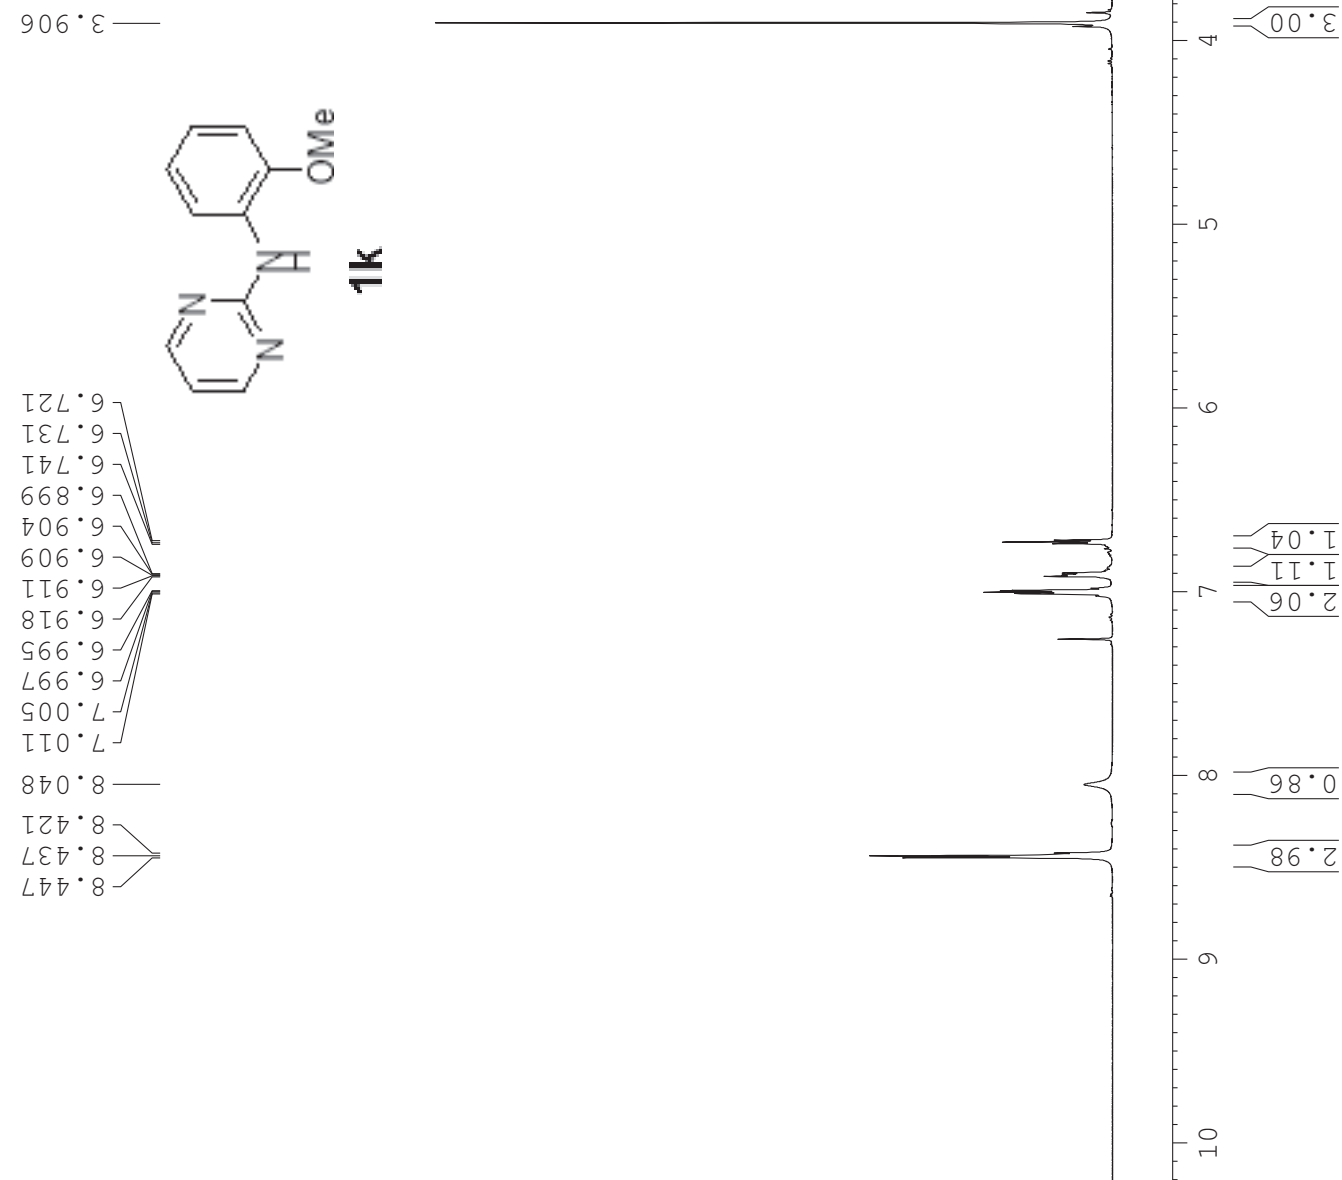

QGY-1-45  
C13CPD CDC13

NAME XB20111231  
EXPNO 8  
PROCNO 1  
Date\_ 20111231  
Time 11.03  
INSTRUM spect  
PROBHD 5 mm PATXO 19F  
PULPROG zgpg30  
TD 65536  
SOLVENT CDC13  
NS 128  
DS 4  
SWH 30030.029 Hz  
FIDRES 0.458222 Hz  
AQ 1.0912410 sec  
RG 114  
DW 16.650 usec  
DE 6.00 usec  
TE 295.6 K  
D1 2.00000000 sec  
d11 0.03000000 sec  
DELTA 1.89999998 sec  
TD0 1

==== CHANNEL f1 =====  
NUC1 13C  
P1 9.50 usec  
PL1 -0.50 dB  
SFO1 125.7703643 MHz

==== CHANNEL f2 =====  
CPDPRG2 waltz16  
NUC2 1H  
PCPD2 80.00 usec  
PL2 2.00 dB  
PL12 16.50 dB  
PL13 16.50 dB  
SFO2 500.1320005 MHz  
SI 32768  
SF 125.7577890 MHz  
WDW no  
SSB 0  
LB 0.00 Hz  
GB 0

55.71

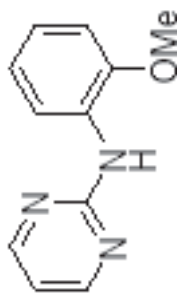

159.89  
157.87  
148.03  
129.01  
121.98  
120.88  
118.65  
112.34  
110.00

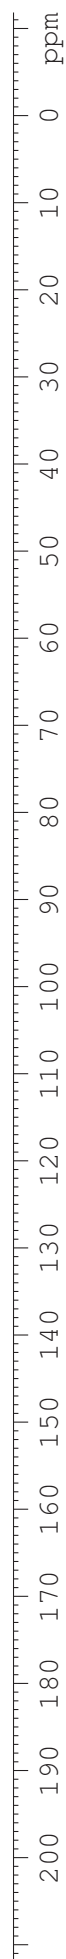

QGY-1-75  
PROTON CDC13

NAME XB20120227  
EXPNO 3  
PROCNO 1  
Date\_ 20120227  
Time 10.41  
INSTRUM spect  
PROBHD 5 mm PATXO 19F  
PULPROG zg30  
TD 65536  
SOLVENT CDC13  
NS 16  
DS 2  
SWH 10330.578 Hz  
FIDRES 0.157632 Hz  
AQ 3.1720407 sec  
RG 362  
DW 48.400 usec  
DE 6.00 usec  
TE 293.5 K  
D1 1.00000000 sec  
TD0 1

==== CHANNEL f1 =====  
NUC1 1H  
P1 13.70 usec  
PL1 1.00 dB  
SF01 500.1330885 MHz  
SI 32768  
SF 500.1300129 MHz  
WDW EM  
SSB 0  
LB 0.30 Hz  
GB 0  
PC 1.00

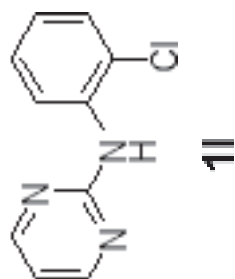

8.475  
8.465  
8.460  
7.851  
7.408  
7.394  
7.393  
7.313  
7.297  
7.282  
7.012  
7.010  
6.996  
6.982  
6.980  
6.817  
6.807  
6.797

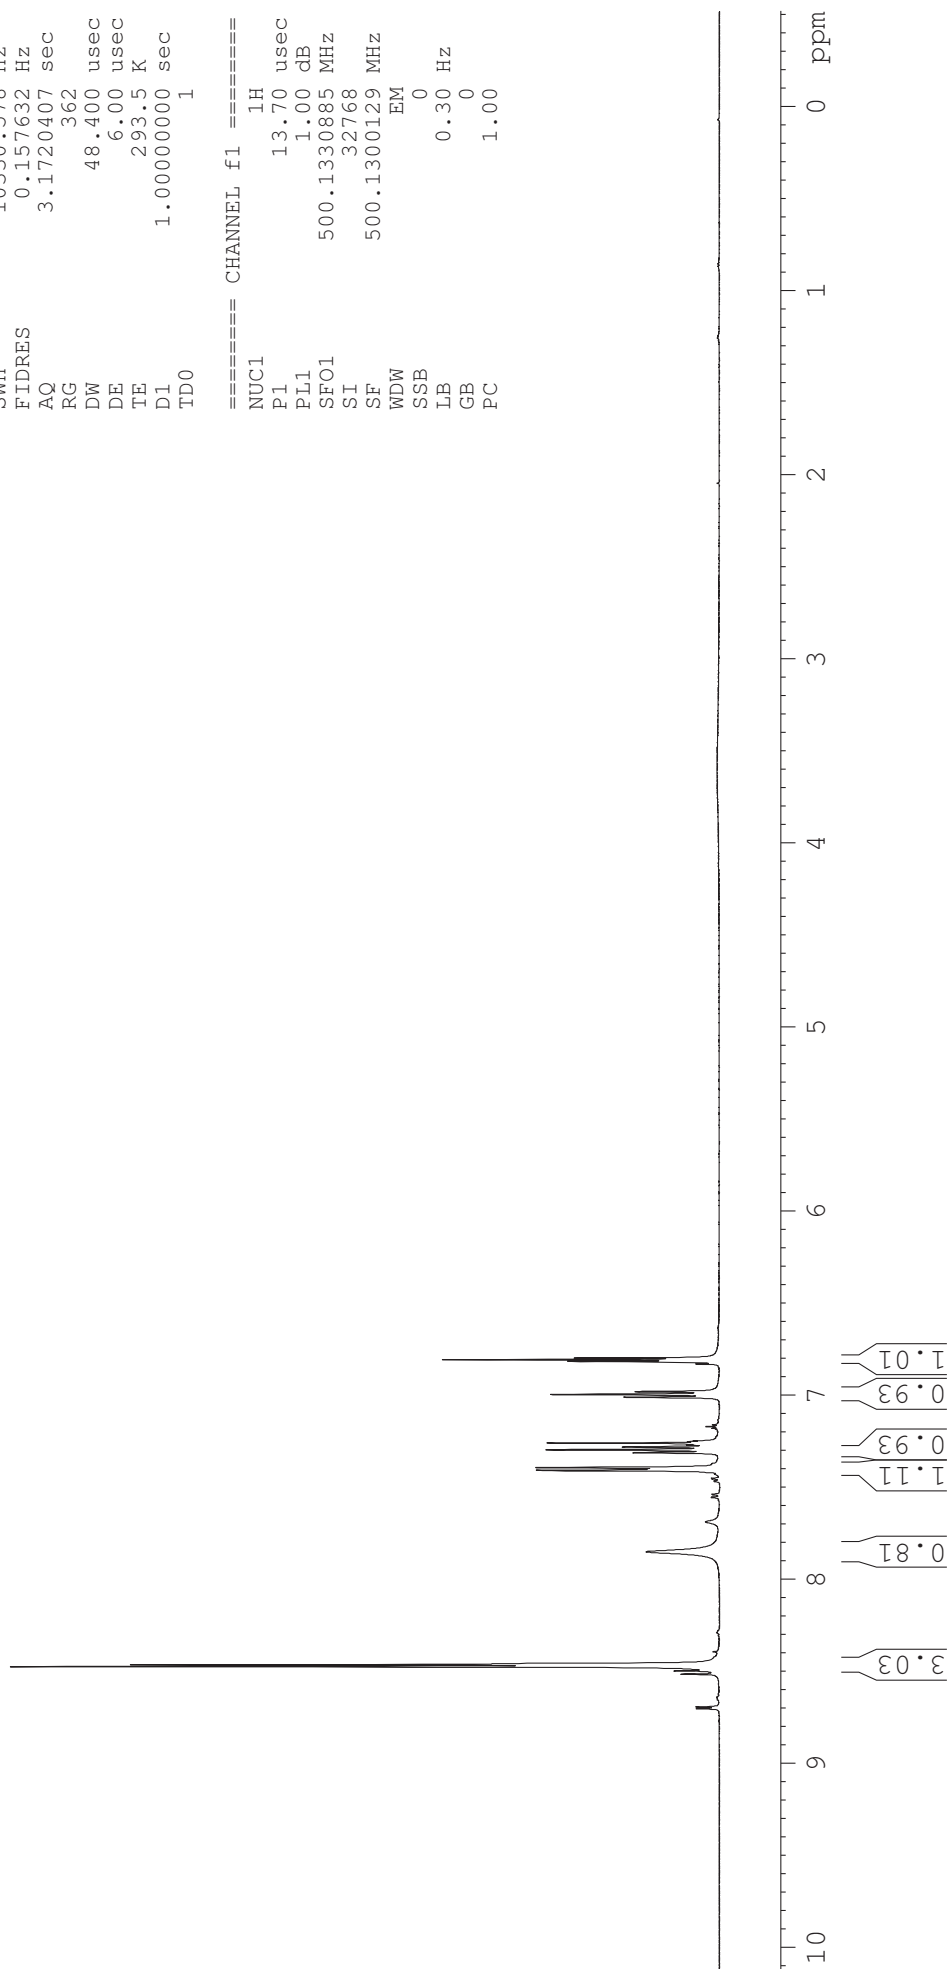

QGY-1-75  
C13CPD CDCl3

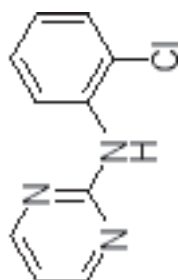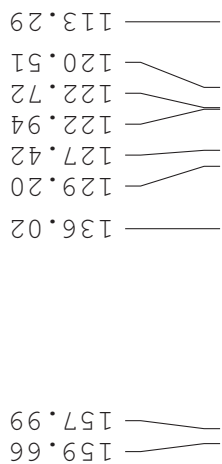

Current Data Parameters  
NAME XB20120228  
EXNO 23  
PROCNO 1

F2 - Acquisition Parameters  
Date\_ 20120228  
Time\_ 20.47  
INSTRUM spect  
PROBHD 5 mm PATXO 19F  
PULPROG zgpg30  
TD 6536  
SOLVENT CDCl3  
NS 128  
DS 4  
SWH 30030.029 Hz  
FIDRES 0.458222 Hz  
AQ 1.0912410 sec  
RG 101.6  
DM 16.650 usec  
DE 6.00 usec  
TE 295.4 K  
d1 2.00000000 sec  
d11 0.03000000 sec  
DELTA 1.89999998 sec  
TD0 1

==== CHANNEL f1 =====  
NUC1 13C  
P1 9.50 usec  
PL1 -0.50 dB  
SF01 125.7703643 MHz

==== CHANNEL f2 =====  
CPDPRG2 waltz16  
NUC2 1H  
PCPD2 80.00 usec  
PL2 1.00 dB  
PL12 16.33 dB  
PL13 16.50 dB  
SFO2 500.1320005 MHz

F2 - Processing parameters  
SI 32768  
SF 125.7577890 MHz  
WDW no  
SSB 0  
LB 0.00 Hz  
GB 0  
PC 1.40

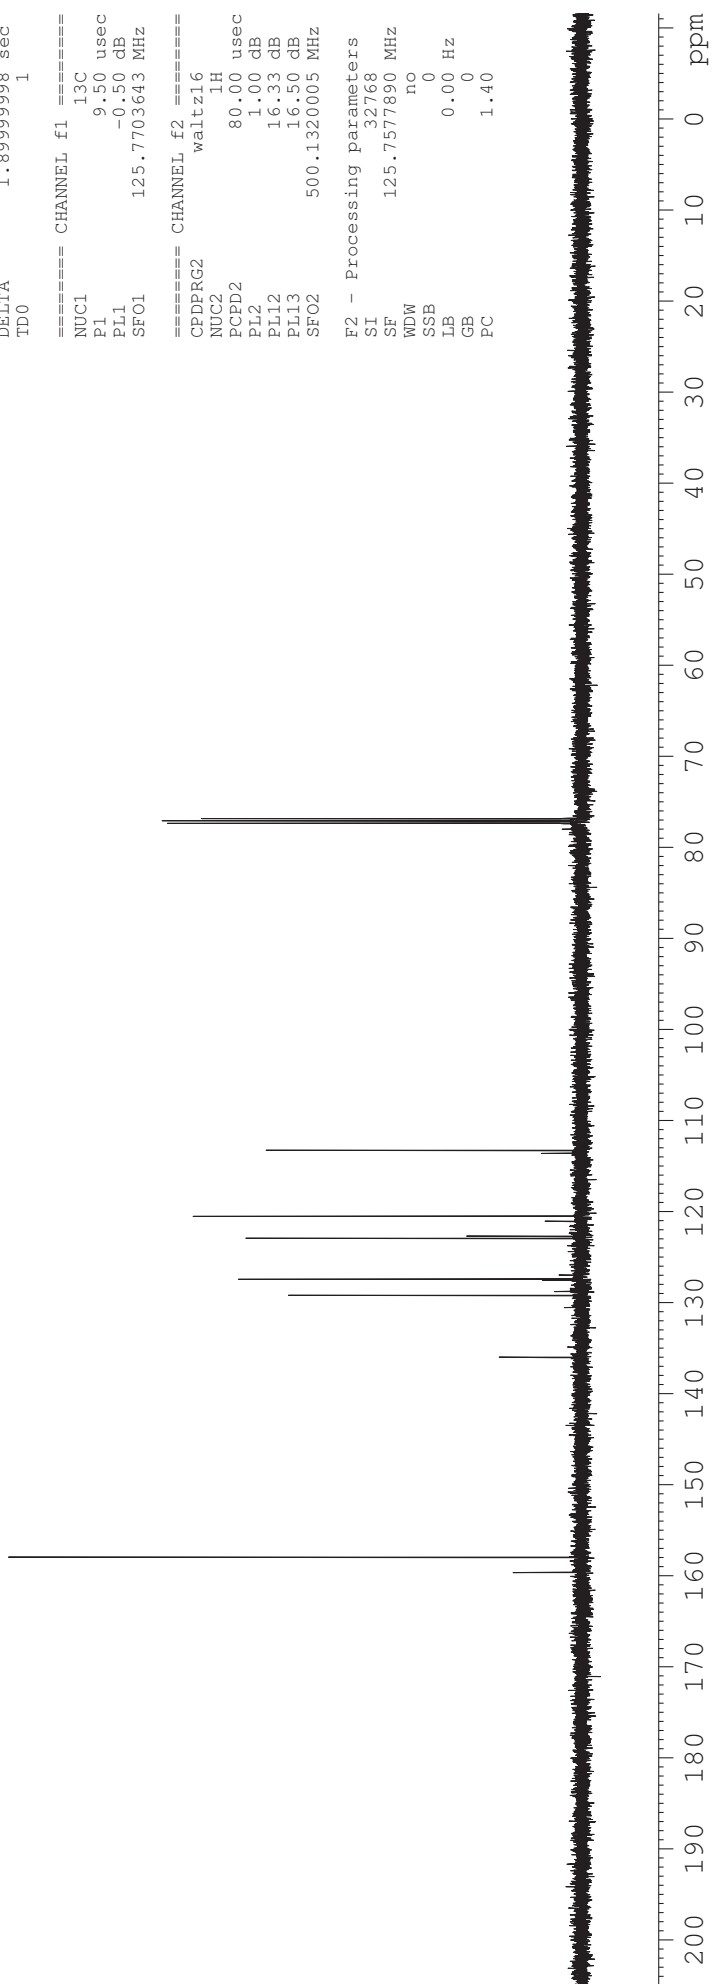



QGY-1-78-b  
PROTON CDC13

```
NAME          xb20120331
EXPNO         8
PROCNO       1
Date_        20120331
Time         13.30
INSTRUM      spect
PROBHD       5 mm PATXO 19F
PULPROG      zg30
TD           65536
SOLVENT      CDC13
NS           16
DS           2
SWH          10330.578 Hz
FIDRES       0.157632 Hz
AQ           3.1720407 sec
RG           362
DW           48.400 usec
DE           6.00 usec
TE           295.0 K
D1           1.00000000 sec
TD0          1

===== CHANNEL f1 =====
NUC1         1H
P1           13.70 usec
PL1          1.00 dB
SF01        500.1330885 MHz
SI           32768
SF          500.1300132 MHz
WDW          no
SSB          0
LB           0.00 Hz
GB           0
PC           1.00
```

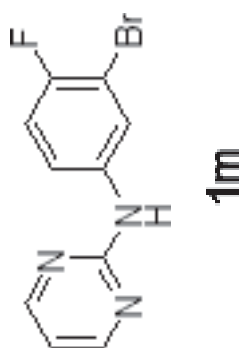

8.442  
8.442  
8.433  
7.994  
7.989  
7.982  
7.977  
7.740  
7.740  
7.449  
7.444  
7.444  
7.441  
7.436  
7.431  
7.426  
7.423  
7.418  
7.097  
7.080  
7.063  
6.790  
6.780  
6.770

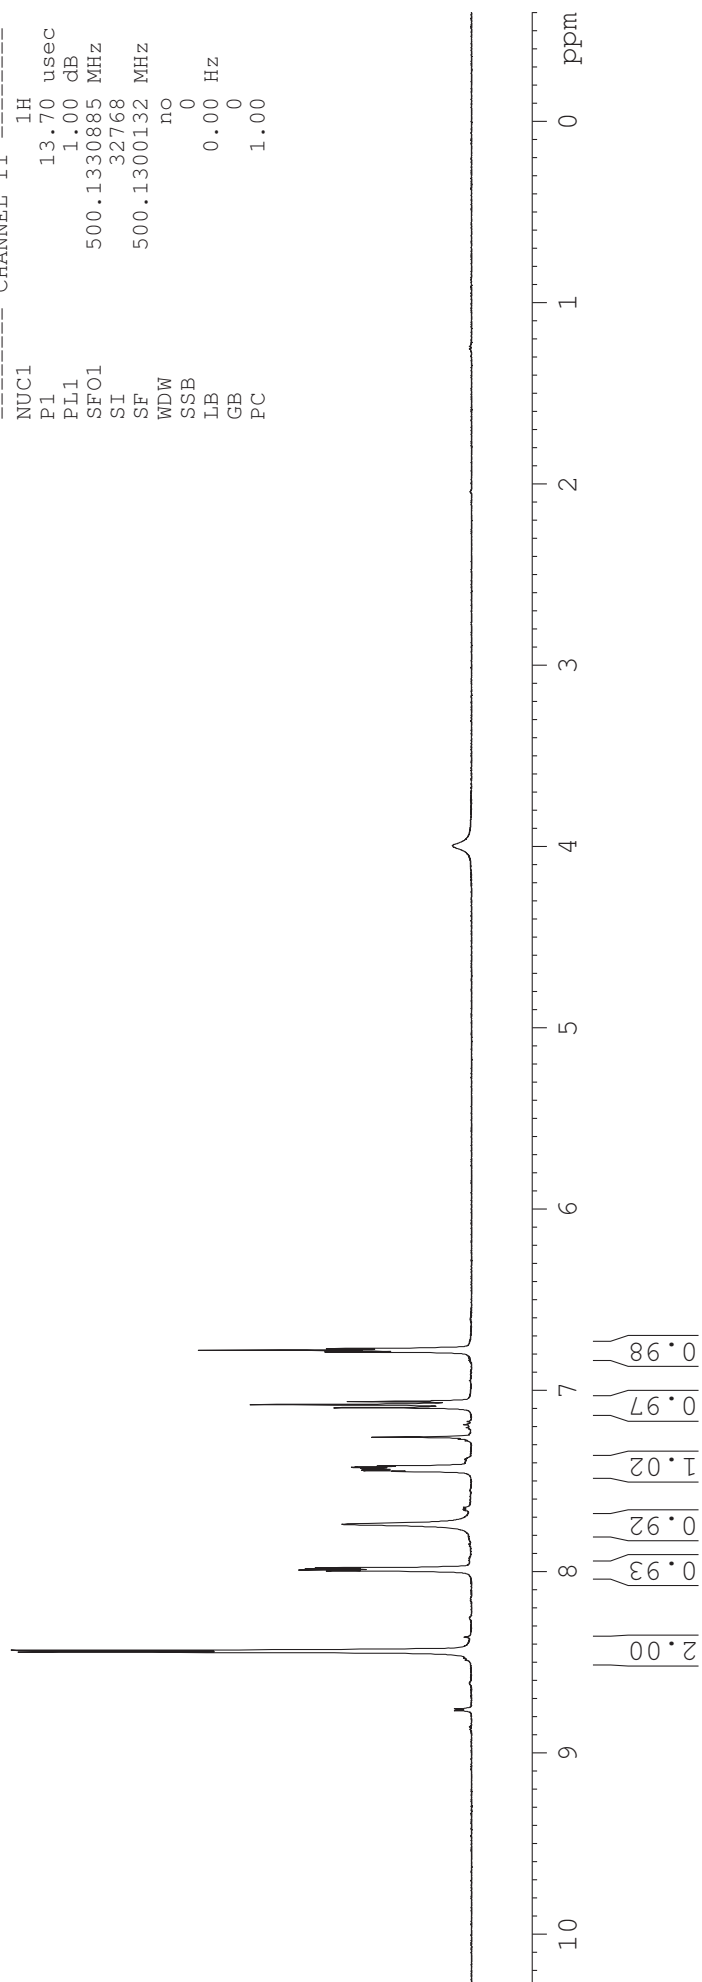

QGY-1-78-b  
19Fdeflt CDC13 1

-114.96  
-114.98  
-114.99  
-115.00

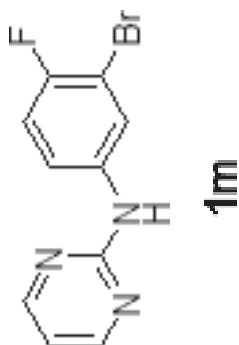

Current Data Parameters  
NAME XBZ0120401  
EXPNO 7  
PROCNO 1  
F2 - Acquisition Parameters  
Date\_ 20120401  
Time 17.41  
INSTRUM spect  
PROBHD 5 mm PAXO 19F  
PULPROG zg  
TD 131072  
SOLVENT CDC13  
NS 8  
DS 4  
SWH 100000.000 Hz  
FIDRES 0.762939 Hz  
AQ 0.6554150 sec  
RG 322.5  
DW 5.000 usec  
DE 6.00 usec  
TE 294.4 K  
D1 1.00000000 sec  
TD0 1  
===== CHANNEL f1 =====  
NUC1 19F  
P1 19.30 usec  
PL1 4.00 dB  
SFO1 470.5453180 MHz  
F2 - Processing parameters  
SI 65536  
SF 470.5923770 MHz  
WDW no  
SSB 0  
LB 0.00 Hz  
GB 0  
PC 1.00

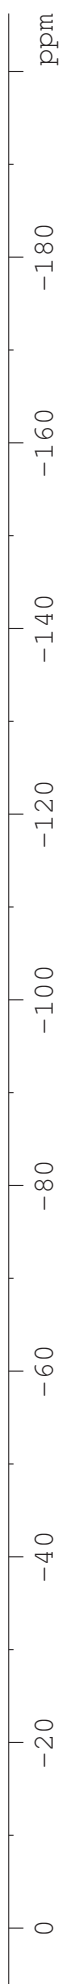

QGY-1-78-b  
C13CPD CDCl3

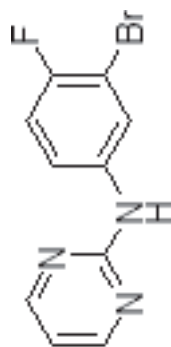

159.48  
157.97  
155.93  
154.00  
136.18  
136.16  
124.38  
120.15  
120.09  
116.42  
116.24  
112.95  
109.00  
108.83

Current Data Parameters  
NAME xb20120401  
EXPNO 8  
PROCNO 1

F2 - Acquisition Parameters  
Date\_ 20120401  
Time 18.05  
INSTRUM spect  
PROBHD 5 mm PAXO 19F  
PULPROG zgpg30  
TD 65536  
SOLVENT CDCl3  
NS 128  
DS 4  
SWH 30030.029 Hz  
FIDRES 0.458222 Hz  
AQ 1.0912410 sec  
RG 114  
DW 16.650 usec  
DE 6.00 usec  
TE 295.7 K  
D1 2.00000000 sec  
d11 0.03000000 sec  
DELTA 1.89999998 sec  
ID0 1

==== CHANNEL f1 =====  
NUC1 13C  
P1 9.50 usec  
PL1 -0.50 dB  
SFO1 125.7703643 MHz

==== CHANNEL f2 =====  
CPDPRG2 waltz16  
NUC2 1H  
PCPD2 80.00 usec  
PL2 1.00 dB  
PL12 16.33 dB  
PL13 16.50 dB  
SFO2 500.1320005 MHz

F2 - Processing parameters  
SI 32768  
SF 125.7577890 MHz  
WDW EM  
SSB 0  
LB 1.00 Hz  
GB 0  
PC 0.90

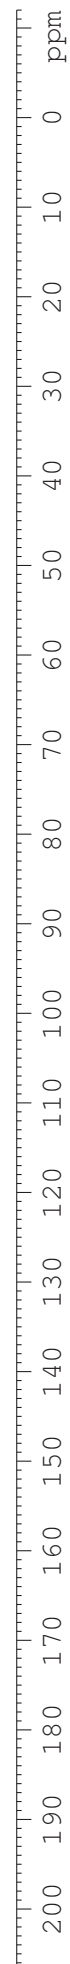

FT-1-96  
PROTON CDCl3

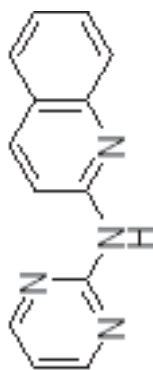

9.477  
8.689  
8.677  
8.671  
8.667  
8.151  
8.133  
7.886  
7.869  
7.760  
7.744  
7.658  
7.656  
7.641  
7.627  
7.625  
7.407  
7.406  
7.392  
7.378  
7.376  
6.885  
6.876  
6.866

Current Data Parameters  
NAME XB20120516  
EXNO 4  
PROCNO 1

F2 - Acquisition Parameters  
Date\_ 20120516  
Time\_ 10.06  
INSTRUM spect  
PROBHD 5 mm PATXO 19F  
PULPROG zg30  
TD 65536  
SOLVENT CDCl3  
NS 8  
DS 2  
SWH 10330.578 Hz  
FIDRES 0.157632 Hz  
AQ 3.1720407 sec  
RG 203.2  
DM 48.400 usec  
DE 6.00 usec  
TE 295.2 K  
D1 1.00000000 sec  
TD0 1

==== CHANNEL f1 =====  
NUC1 1H  
P1 13.72 usec  
PL1 1.00 dB  
SF01 500.1330885 MHz

F2 - Processing parameters  
SI 32768  
SF 500.1300129 MHz  
WDW EM  
SSB 0  
LB 0.30 Hz  
GB 0  
PC 1.00

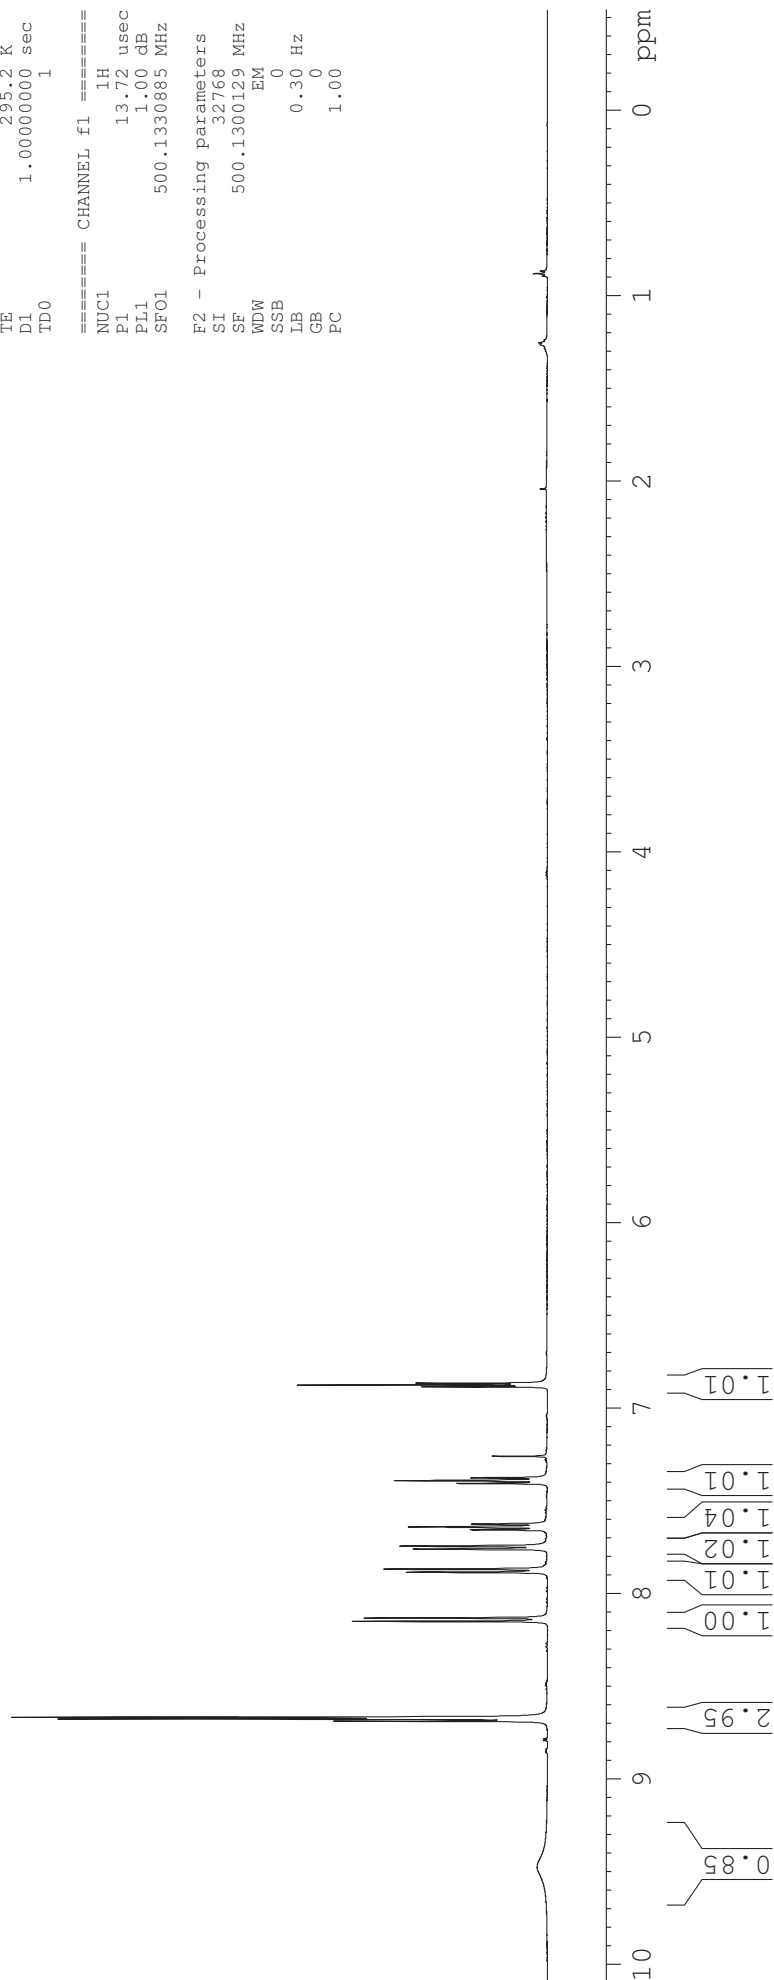

FT-1-96  
C13CPD CDC13 I

Current Data Parameters  
NAME XB20120516  
EXPNO 6  
PROCNO 1

F2 - Acquisition Parameters  
Date\_ 20120516  
Time 10.16  
INSTRUM spect  
PROBHD 5 mm PATXO 19F  
PULPROG zgpg30  
TD 65536  
SOLVENT CDC13  
NS 128  
DS 4  
SWH 30030.029 Hz  
FIDRES 0.458222 Hz  
AQ 1.0912410 sec  
RG 128  
DW 16.650 usec  
DE 6.00 usec  
TE 296.5 K  
D1 2.00000000 sec  
d11 0.03000000 sec  
DELTA 1.89999998 sec  
TD0 1

==== CHANNEL f1 =====  
NUC1 13C  
P1 9.50 usec  
PL1 -0.50 dB  
SFO1 125.7703643 MHz

==== CHANNEL f2 =====  
CPDPRG2 waltz16  
NUC2 1H  
PCPD2 80.00 usec  
PL2 1.00 dB  
PL12 16.31 dB  
PL13 16.50 dB  
SFO2 500.1320005 MHz

F2 - Processing parameters  
SI 32768  
SF 125.7577890 MHz  
WDW no  
SSB 0  
LB 0.00 Hz  
GB 0

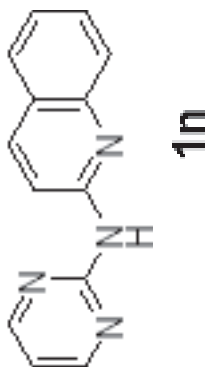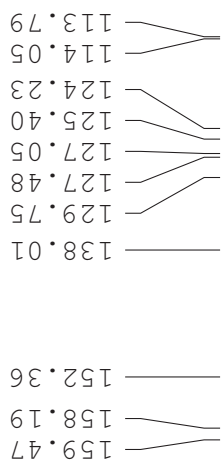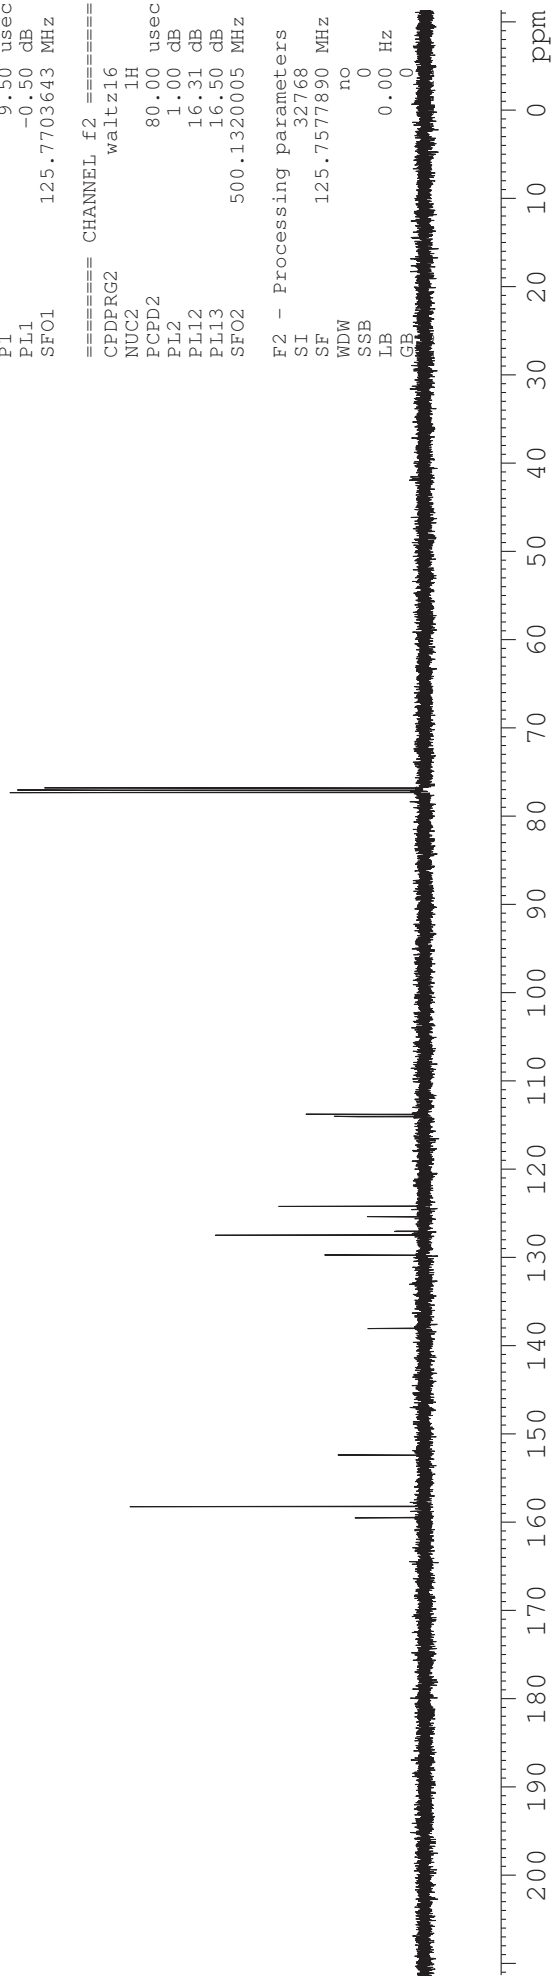

QGY-1-102  
PROTON CDCl3

```
Current Data Parameters
NAME      XB20120410
EXPNO     1
PROCNO    1

F2 - Acquisition Parameters
Date_     20120410
Time      12.57
INSTRUM   spect
PROBHD    5 mm PATXO 19F
PULPROG   zg30
TD         65536
SOLVENT   CDCl3
NS         8
DS         2
SWH        10330.578 Hz
FIDRES     0.157632 Hz
AQ         3.1720407 sec
RG         181
DM         48.400 usec
DE         6.00 usec
TE         294.8 K
D1         1.00000000 sec
TD0        1

===== CHANNEL f1 =====
NUC1       1H
P1         13.70 usec
PL1        1.00 dB
SFO1       500.1330885 MHz

F2 - Processing parameters
SI         32768
SF         500.1300130 MHz
WDW        EM
SSB        0
LB         0.30 Hz
GB         0
PC         1.00
```

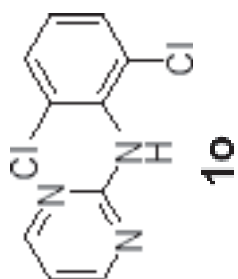

8.380  
8.371  
7.981  
7.415  
7.399  
7.181  
7.165  
7.149  
6.719  
6.709  
6.700

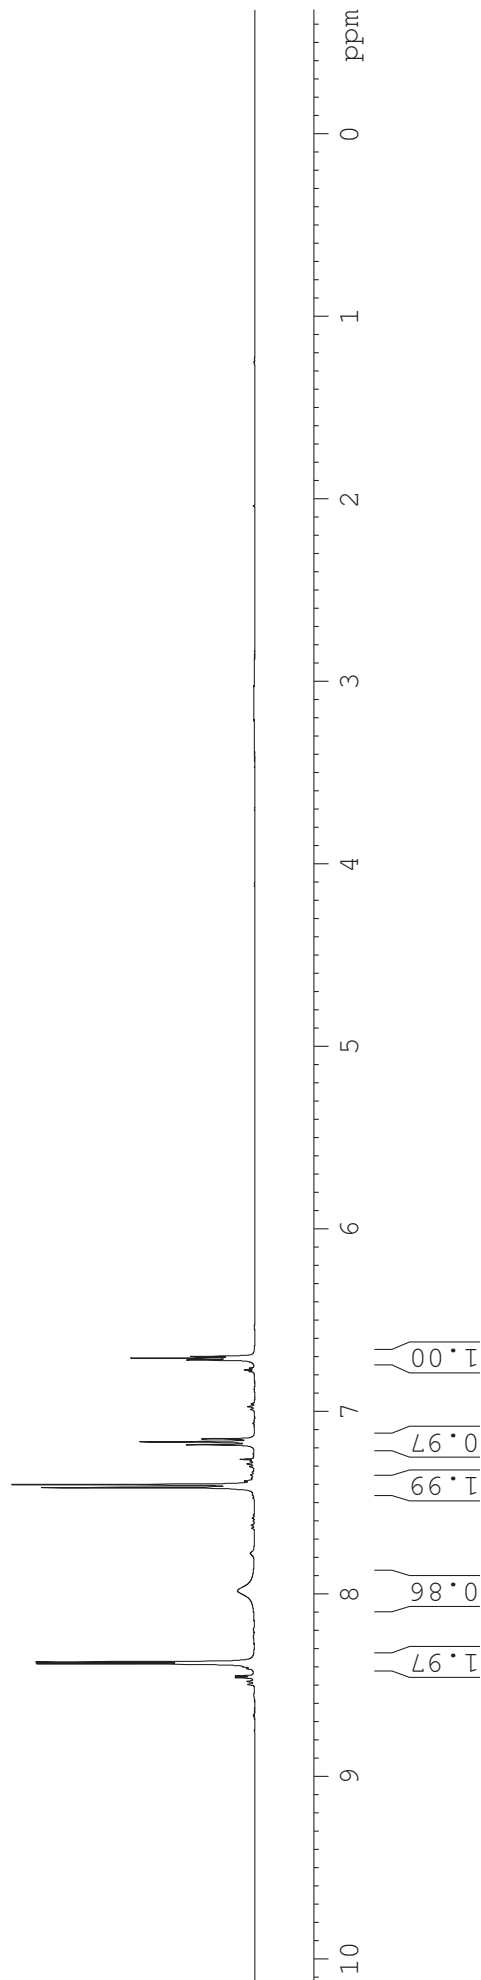

QGY-1-102  
C13CPD CDCl3

Current Data Parameters  
NAME XB20120410  
EXPNO 4  
PROCNO 1

F2 - Acquisition Parameters  
Date\_ 20120410  
Time 13.21  
INSTRUM spect  
PROBHD 5 mm PAXO 19F  
PULPROG zgpg30  
TD 65536  
SOLVENT CDCl3  
NS 128  
DS 4  
SWH 30030.029 Hz  
FIDRES 0.458222 Hz  
AQ 1.0912410 sec  
RG 114  
DW 16.650 usec  
DE 6.00 usec  
TE 296.2 K  
D1 2.00000000 sec  
d11 0.03000000 sec  
DELTA 1.89999998 sec  
TD0 1

==== CHANNEL f1 =====  
NUC1 13C  
P1 9.50 usec  
PL1 -0.50 dB  
SFO1 125.7703643 MHz

==== CHANNEL f2 =====  
CPDPRG2 waltz16  
NUC2 1H  
PCPD2 80.00 usec  
PL2 1.00 dB  
PL12 16.33 dB  
PL13 16.50 dB  
SFO2 500.1320005 MHz

F2 - Processing parameters  
SI 32768  
SF 125.7577890 MHz  
WDW EM  
SSB 0  
LB 3.00 Hz  
GB 0  
PC 1.40

158.21  
160.55  
134.19  
133.94  
128.58  
127.75  
112.69

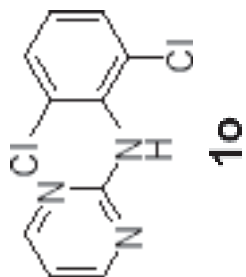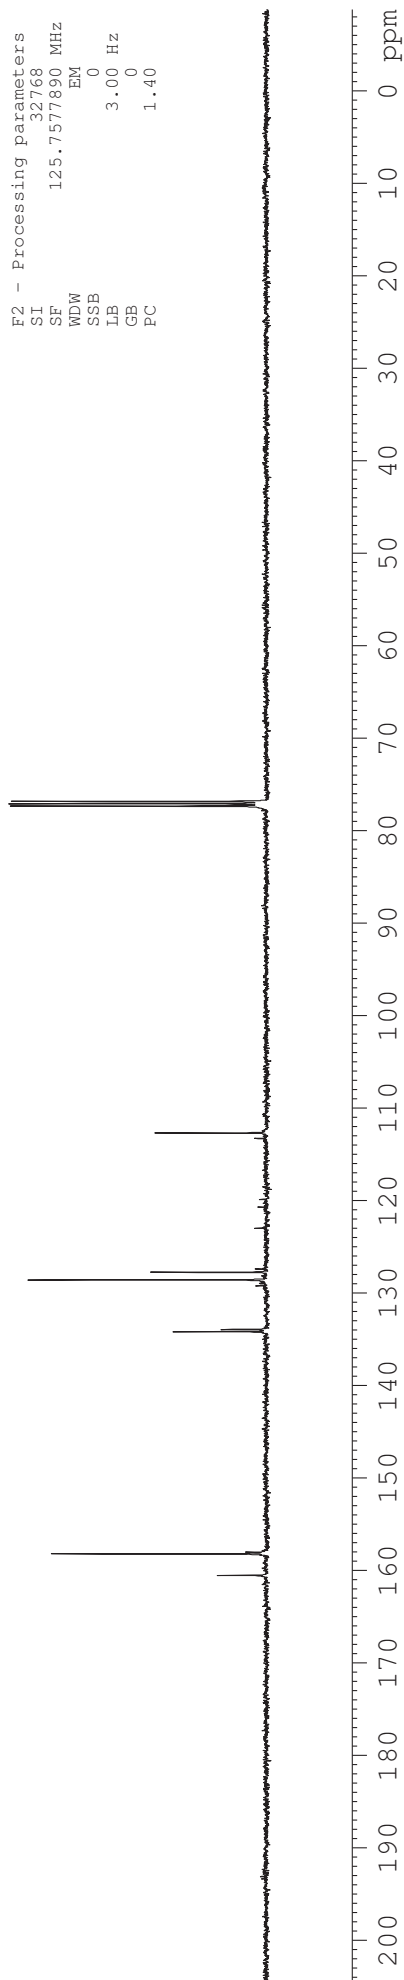

FT-1-47  
PROTON Acetone

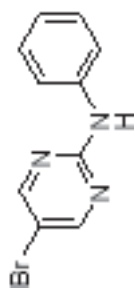

**1p**

7.816  
7.800  
7.351  
7.335  
7.320  
7.048  
7.033  
7.018  
8.894  
8.529

NAME XB20120223-1  
EXPNO 6  
PROCNO 1  
Date\_ 20120223  
Time 17.37  
INSTRUM spect  
PROBHD 5 mm PATXO 19F  
PULPROG zg30  
TD 65536  
SOLVENT Acetone  
NS 16  
DS 2  
SWH 10330.578 Hz  
FIDRES 0.157632 Hz  
AQ 3.1720407 sec  
RG 322.5  
DW 48.400 usec  
DE 6.00 usec  
TE 293.8 K  
D1 1.00000000 sec  
TD0 1

==== CHANNEL f1 =====  
NUC1 1H  
P1 13.65 usec  
PL1 1.00 dB  
SFO1 500.1330885 MHz  
SI 32768  
SF 500.1300000 MHz  
WDW EM  
SSB 0  
LB 0.30 Hz  
GB 0  
PC 1.00

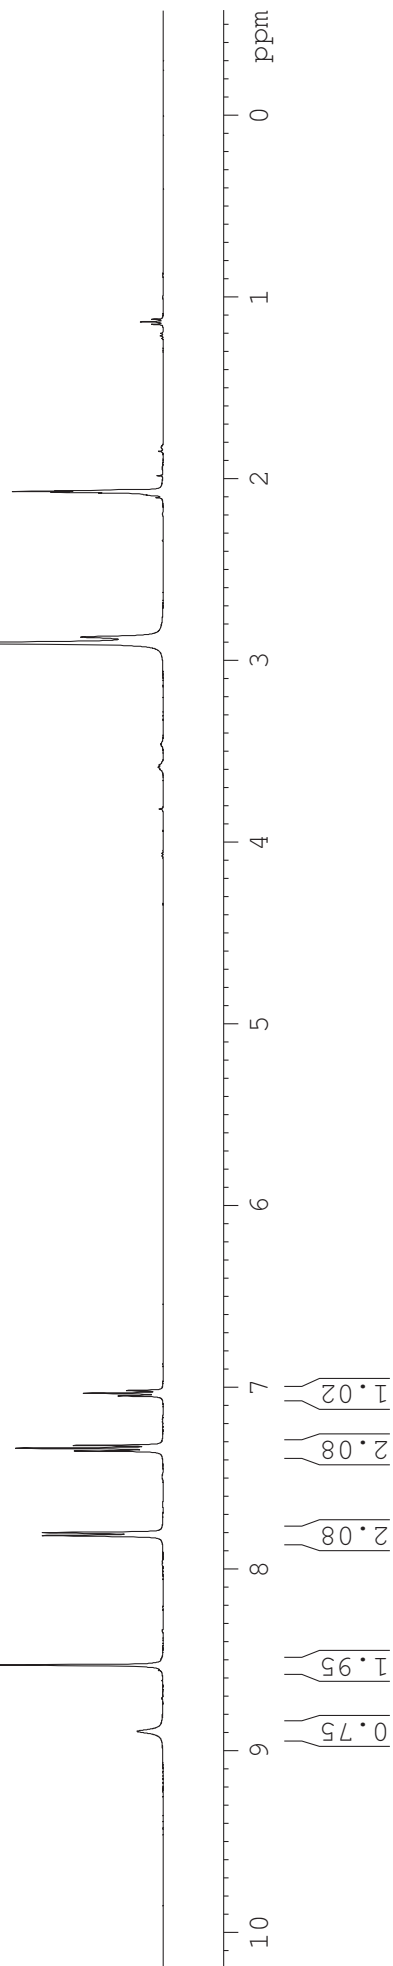



FT-1-47  
C13CPD Acetone

NAME XB20120228  
EXPNO 25  
PROCNO 1  
Date\_ 20120228  
Time 21.01  
INSTRUM spect  
PROBHD 5 mm PAXO 19F  
PULPROG zgpg30  
TD 65536  
SOLVENT Acetone  
NS 128  
DS 4  
SWH 30030.029 Hz  
FIDRES 0.458222 Hz  
AQ 1.0912410 sec  
RG 161.3  
DW 16.650 usec  
DE 6.00 usec  
TE 295.4 K  
D1 2.00000000 sec  
d11 0.03000000 sec  
DELTA 1.89999998 sec  
TD0 1

==== CHANNEL f1 =====  
NUC1 13C  
P1 9.50 usec  
PL1 -0.50 dB  
SFO1 125.7703643 MHz

==== CHANNEL f2 =====  
CPDPRG2 waitz16  
NUC2 1H  
PCPD2 80.00 usec  
PL2 1.00 dB  
PL12 16.33 dB  
PL13 16.50 dB  
SFO2 500.1320005 MHz  
SI 32768  
SF 125.7577890 MHz  
WDW EM  
SSB 0  
LB 1.00 Hz  
GB 0  
PC 1.40

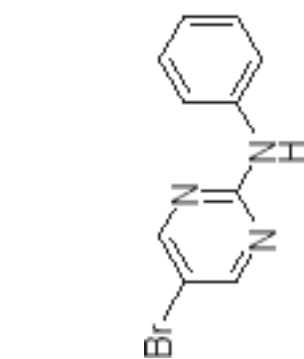

1p

158.81  
158.09  
140.02  
128.58  
122.21  
119.22  
107.84

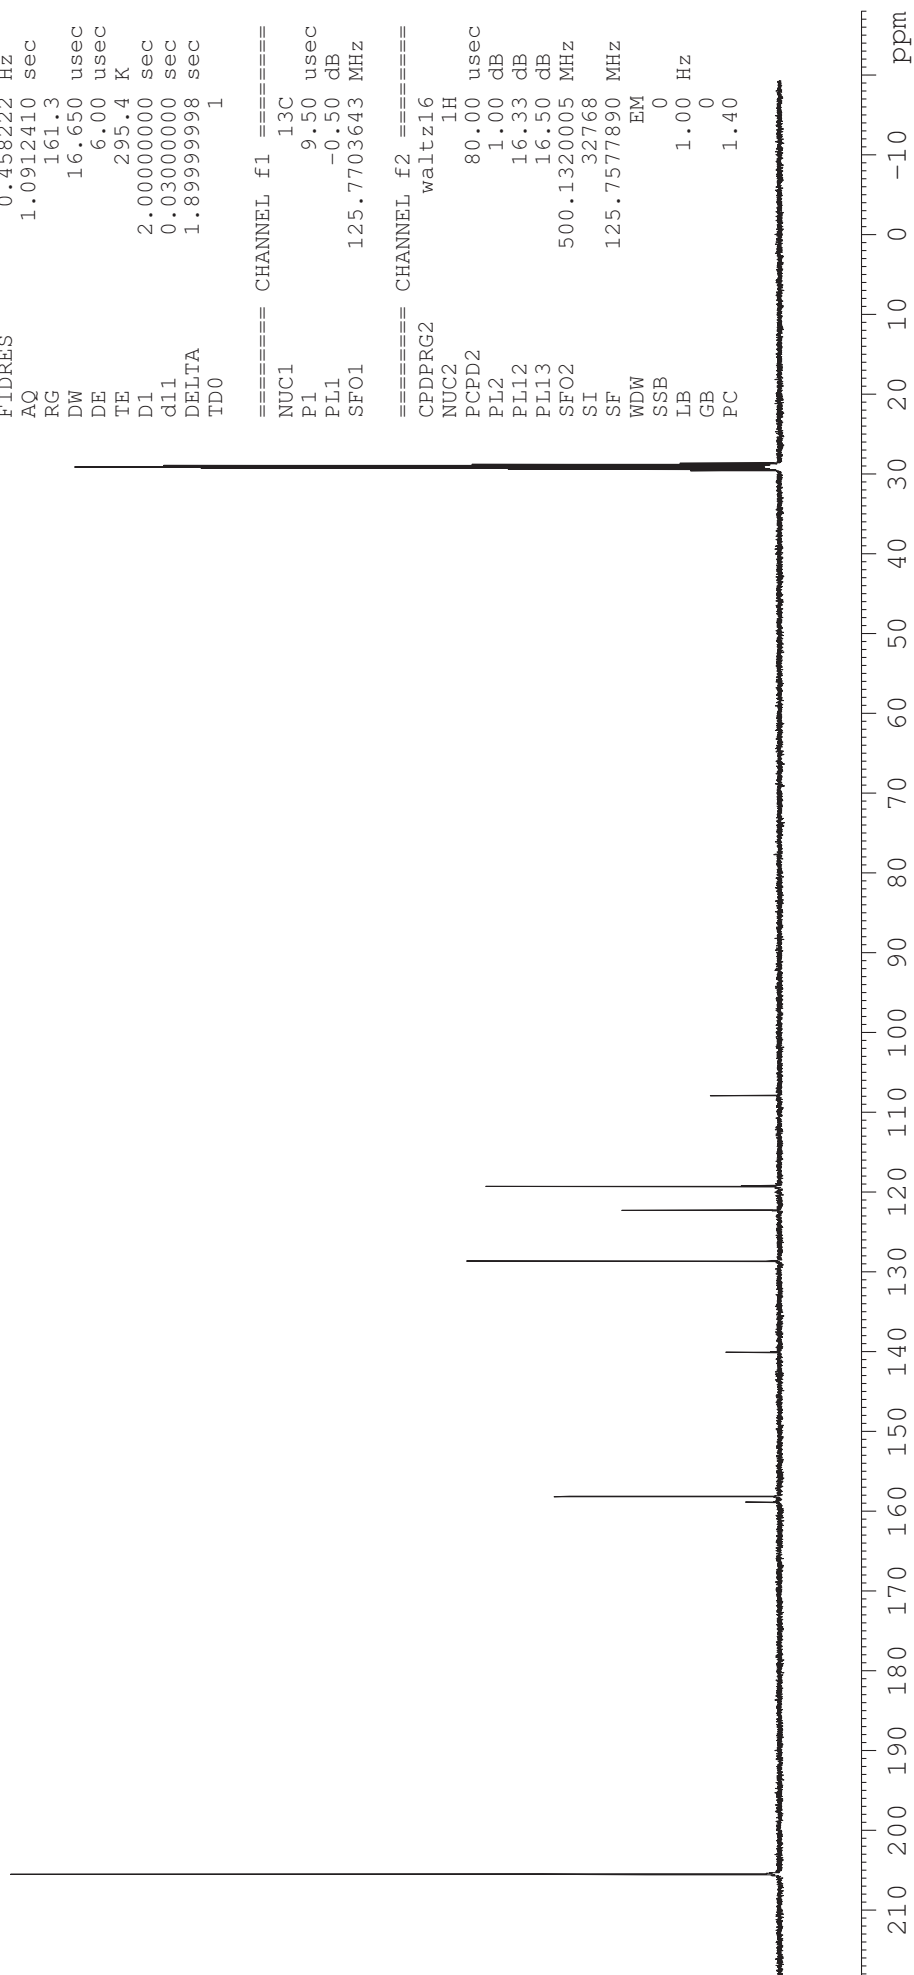

FT-1-70  
PROTON CDCl3

Current Data Parameters  
NAME XB20120327  
EXPNO 2  
PROCNO 1

F2 - Acquisition Parameters  
Date\_ 20120327  
Time\_ 13.14  
INSTRUM spect  
PROBHD 5 mm PAIXO 19F  
PULPROG zg30  
TD 65536  
SOLVENT CDCl3  
NS 16  
DS 2  
SWH 10330.578 Hz  
FIDRES 0.157632 Hz  
AQ 3.1720407 sec  
RG 287.4  
DW 48.400 usec  
DE 6.00 usec  
TE 294.5 K  
D1 1.0000000 sec  
TD0 1

==== CHANNEL f1 =====  
NUC1 1H  
P1 13.70 usec  
PL1 1.00 dB  
SFO1 500.1330885 MHz

F2 - Processing parameters  
SI 32768  
SF 500.1300129 MHz  
WDW no  
SSB 0  
LB 0.00 Hz  
GB 0  
PC 1.00

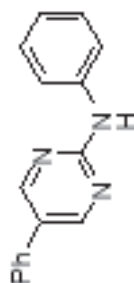

**19**

8.675  
7.738  
7.675  
7.659  
7.528  
7.513  
7.499  
7.484  
7.470  
7.413  
7.394  
7.378  
7.363  
7.107  
7.093  
7.078

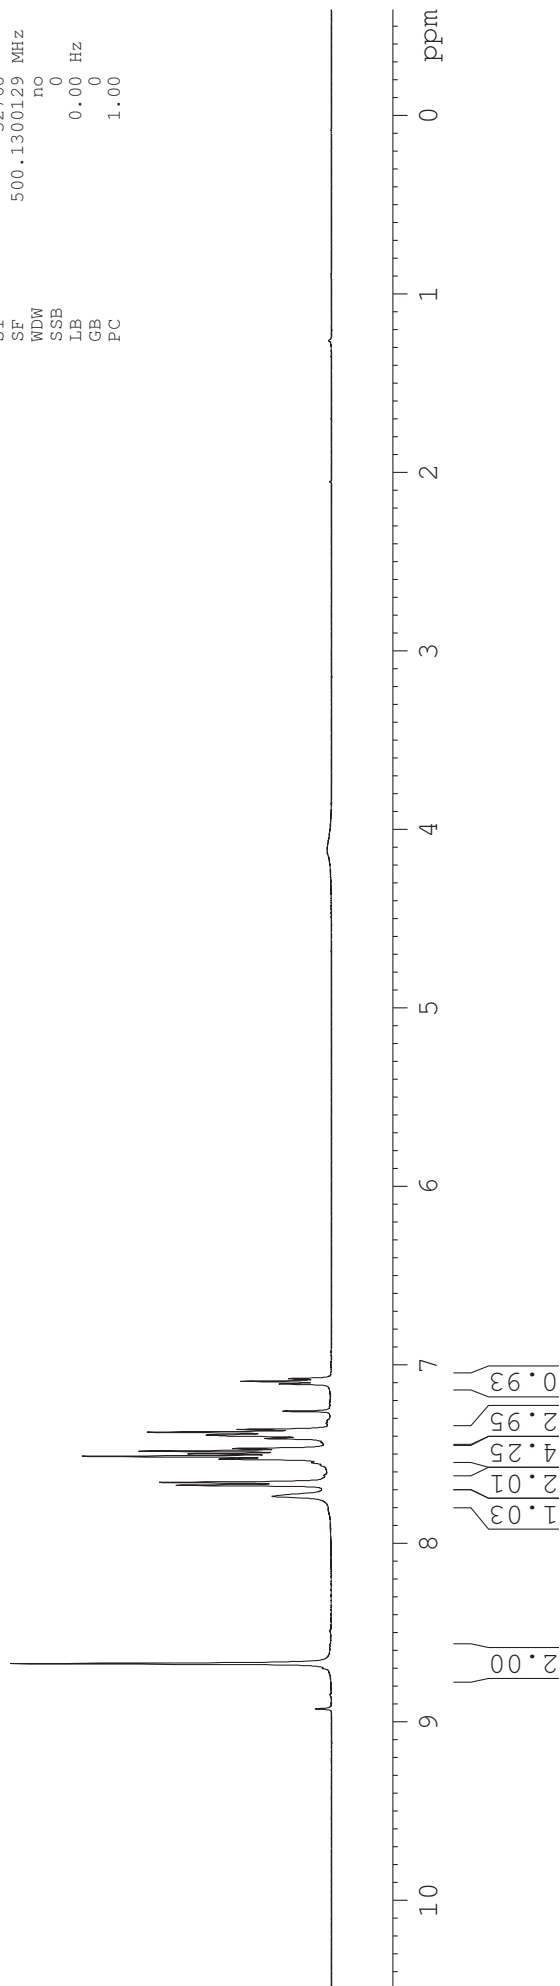

FT-1-70  
C13CPD CDCl3

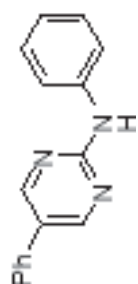

19

158.84  
155.94  
139.02  
134.83  
129.32  
129.07  
127.90  
126.11  
125.70  
123.11  
119.70

Current Data Parameters  
NAME XB20120327  
EXPNO 5  
PROCNO 1

F2 - Acquisition Parameters  
Date\_ 20120327  
Time 13.51  
INSTRUM spect  
PROBHD 5 mm PAXO 19F  
PULPROG zgpg30  
TD 65536  
SOLVENT CDCl3  
NS 128  
DS 4  
SWH 30030.029 Hz  
FIDRES 0.458222 Hz  
AQ 1.0912410 sec  
RG 161.3  
DW 16.650 usec  
DE 6.00 usec  
TE 296.2 K  
D1 2.00000000 sec  
d11 0.03000000 sec  
DELTA 1.89999998 sec  
TDO 1

==== CHANNEL f1 =====  
NUC1 13C  
P1 9.50 usec  
PL1 -0.50 dB  
SFO1 125.7703643 MHz

==== CHANNEL f2 =====  
CPDPRG2 waltz16  
NUC2 1H  
PCPD2 80.00 usec  
PL2 1.00 dB  
PL12 16.33 dB  
PL13 16.50 dB  
SFO2 500.1320005 MHz

F2 - Processing parameters  
SI 32768  
SF 125.7577890 MHz  
WDW EM  
SSB 0  
LB 3.00 Hz  
GB 0  
PC 0.60

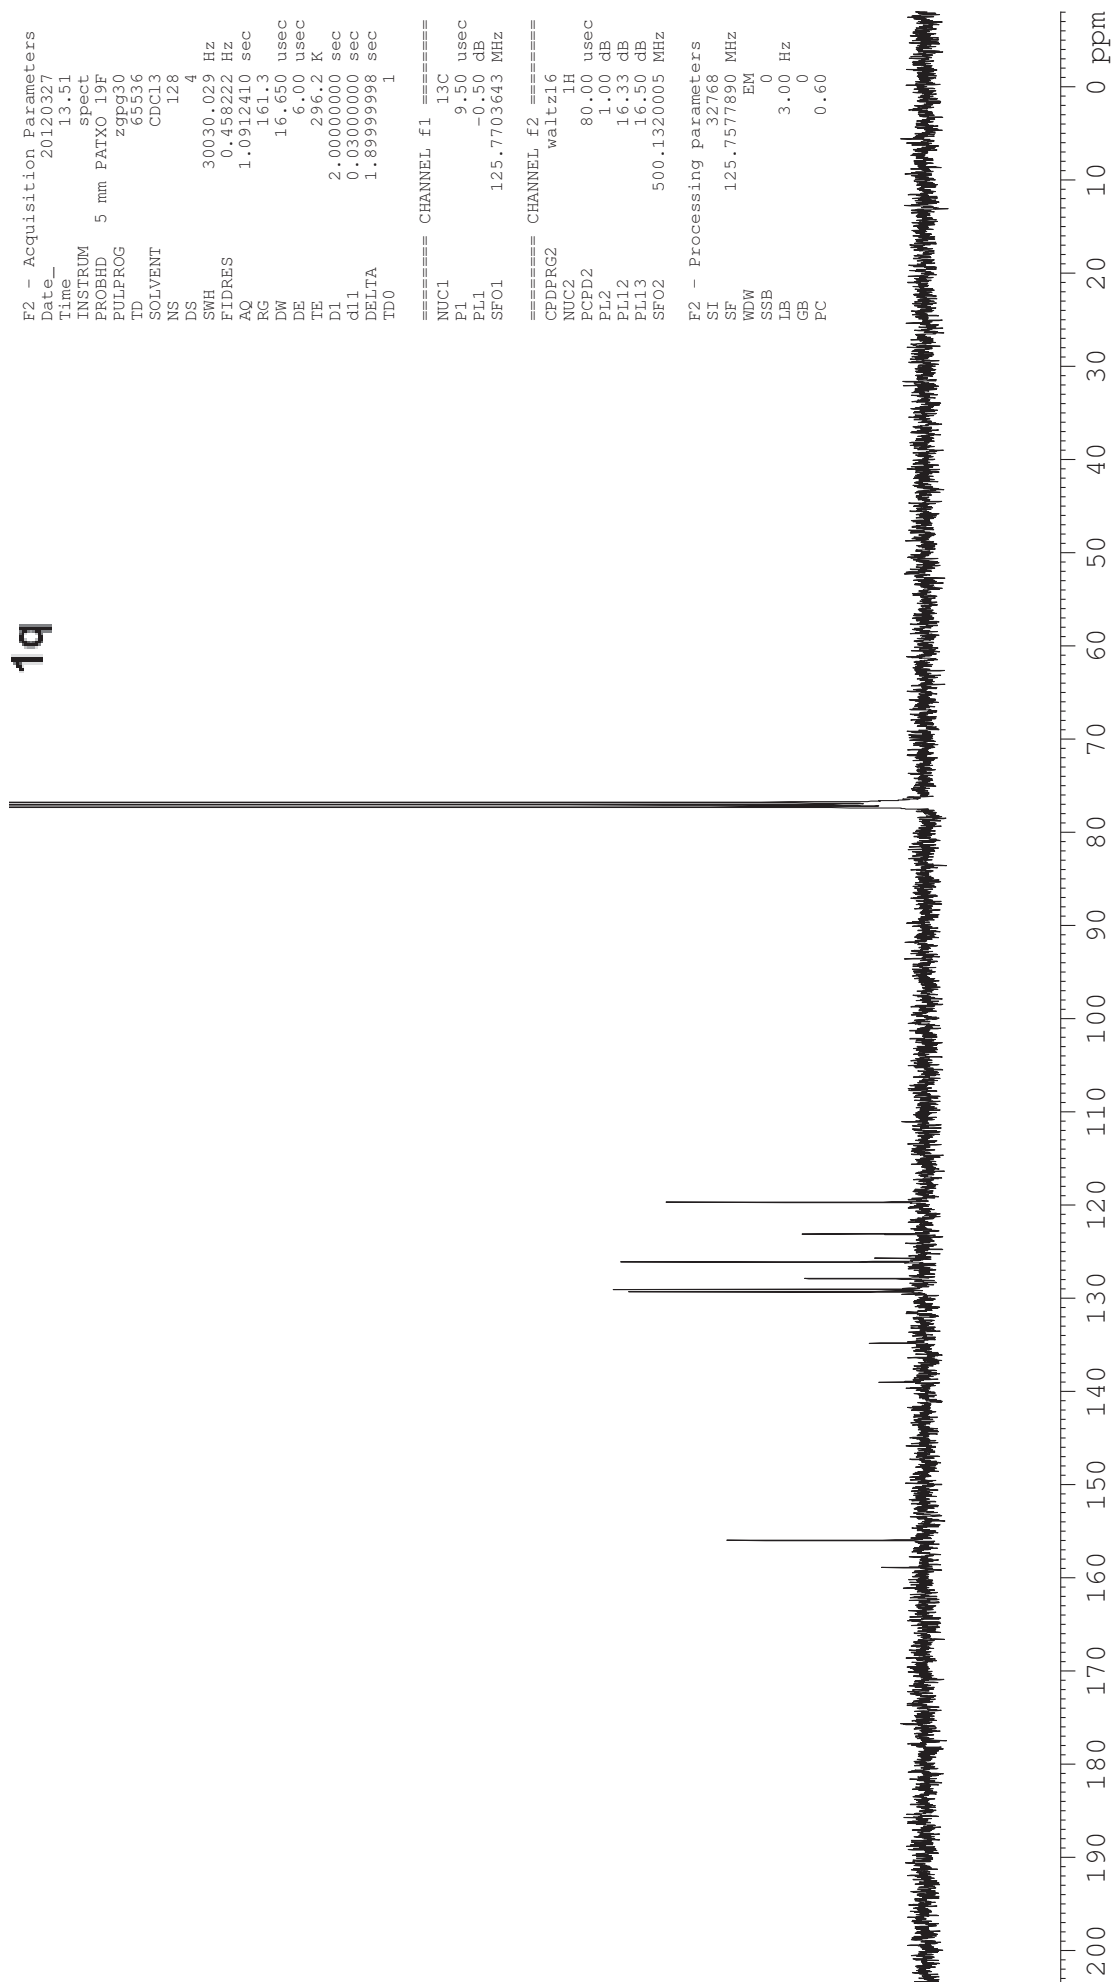

FT-1-72  
PROTON CDC13

NAME XE20120424  
EXPNO 5  
PROCNO 1  
Date\_ 20120424  
Time 14.05  
INSTRUM spect  
PROBHD 5 mm PATXO 19F  
PULPROG zg30  
TD 65536  
SOLVENT CDC13  
NS 16  
DS 2  
SWH 10330.578 Hz  
FIDRES 0.157632 Hz  
AQ 3.1720407 sec  
RG 143.7  
DW 48.400 usec  
DE 6.00 usec  
TE 295.0 K  
D1 1.00000000 sec  
TD0 1

==== CHANNEL f1 =====  
NUC1 1H  
P1 13.72 usec  
PL1 1.00 dB  
SFO1 500.1330885 MHz  
SI 32768  
SF 500.1300130 MHz  
WDW no  
SSB 0  
LB 0.00 Hz  
GB 0  
PC 1.00

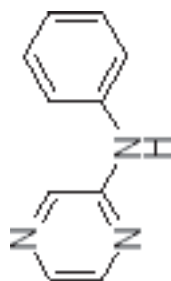

1f

8.246  
8.104  
8.101  
7.968  
7.962  
7.441  
7.424  
7.367  
7.352  
7.336  
7.111  
7.096  
7.082

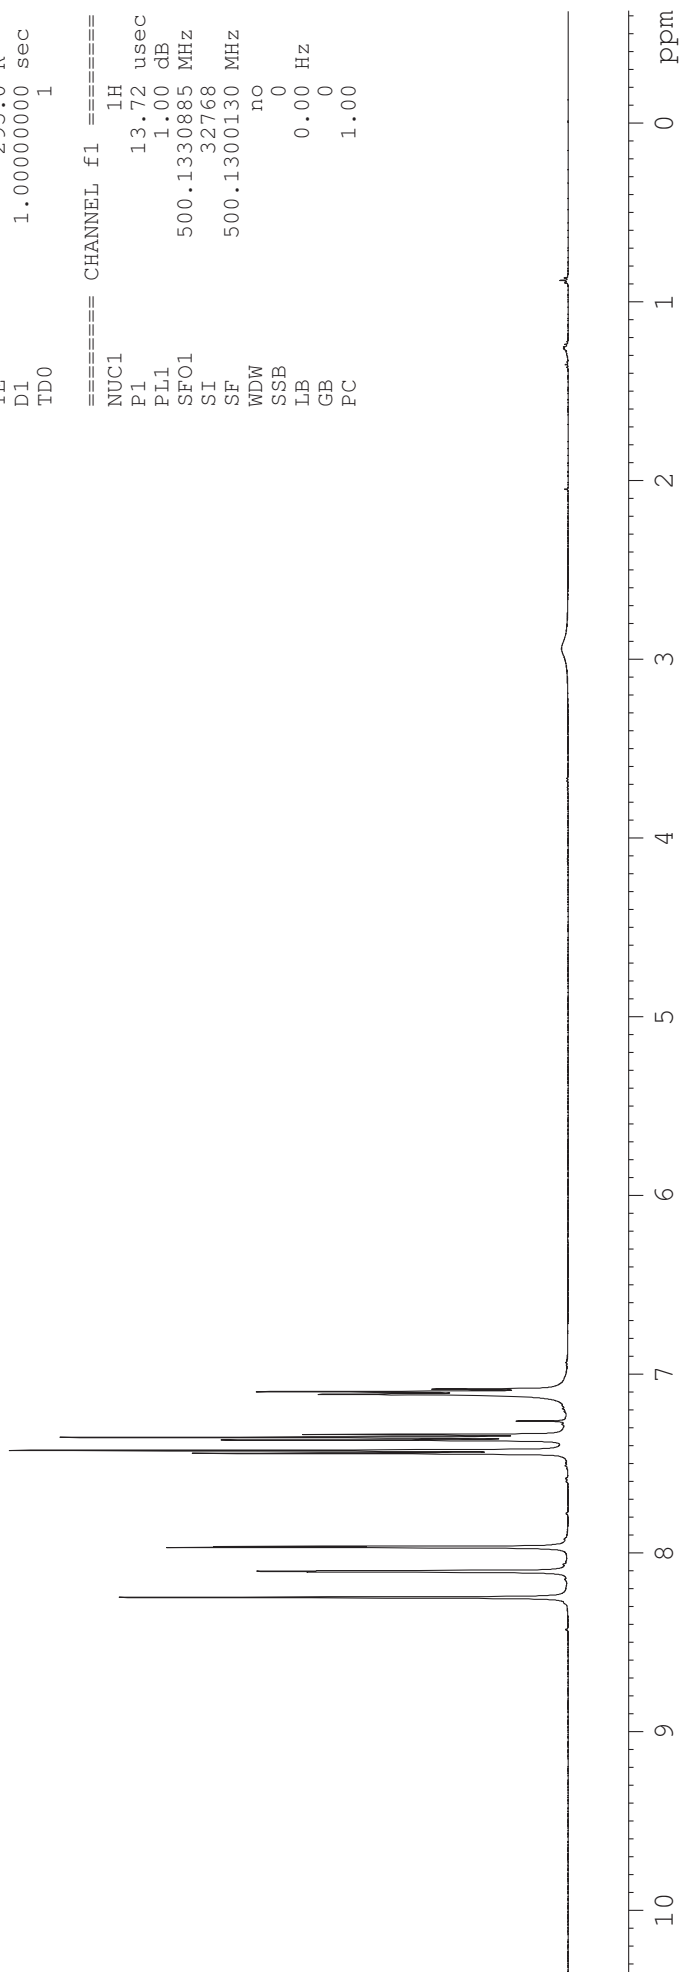

FT-1-72  
C13CPD CDC13

NAME XB20120424  
EXPNO 7  
PROCNO 1  
Date\_ 20120424  
Time 14.16  
INSTRUM spect  
PROBHD 5 mm PATXO 19F  
PULPROG zgpg30  
TD 65536  
SOLVENT CDC13  
NS 128  
DS 4  
SWH 30030.029 Hz  
FIDRES 0.458222 Hz  
AQ 1.0912410 sec  
RG 362  
DW 16.650 usec  
DE 6.00 usec  
TE 296.2 K  
D1 2.00000000 sec  
d11 0.03000000 sec  
DELTA 1.89999998 sec  
TD0 1

==== CHANNEL f1 =====  
NUC1 13C  
P1 9.50 usec  
PL1 -0.50 dB  
SFO1 125.7703643 MHz

==== CHANNEL f2 =====  
CPDPRG2 waltz16  
NUC2 1H  
PCPD2 80.00 usec  
PL2 1.00 dB  
PL12 16.31 dB  
PL13 16.50 dB  
SFO2 500.1320005 MHz  
SI 32768  
SF 125.7577890 MHz  
WDW no  
SSB 0  
LB 0.00 Hz  
GB 0  
PC 1.40

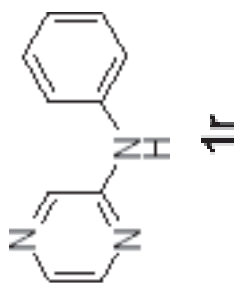

152.39  
141.87  
139.22  
134.65  
132.99  
129.41  
123.65  
120.35

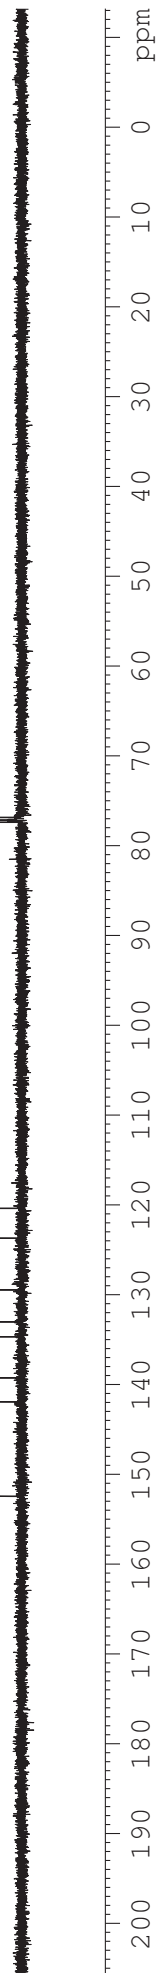

WYT-1  
PROTON CDC13

```
NAME XB20120221
EXPNO 9
PROCNO 1
Date_ 20120221
Time 18.30
INSTRUM spect
PROBHD 5 mm PATXO 19F
PULPROG zg30
TD 65536
SOLVENT CDC13
NS 16
DS 2
SWH 10330.578 Hz
FIDRES 0.157632 Hz
AQ 3.1720407 sec
RG 287.4
DW 48.400 usec
DE 6.00 usec
TE 294.1 K
D1 1.00000000 sec
TD0 1

===== CHANNEL f1 =====
NUC1 1H
P1 13.65 usec
PL1 1.00 dB
SFO1 500.1330885 MHz
SI 32768
SF 500.1300131 MHz
WDW EM
SSB 0
LB 0.30 Hz
GB 0
PC 1.00
```

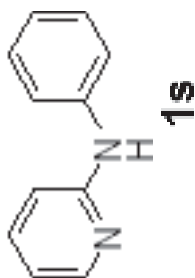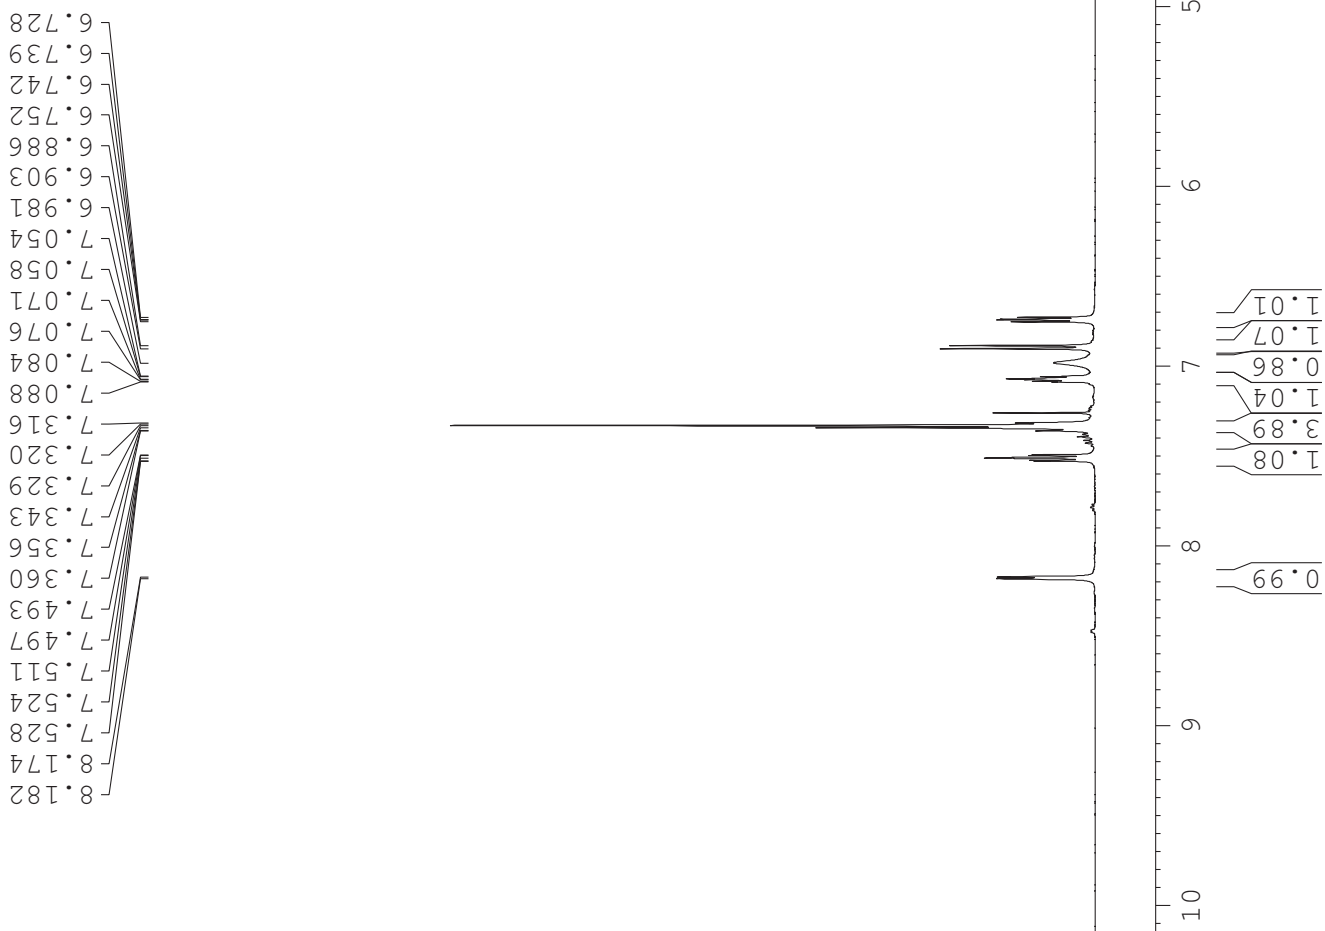

156.14  
148.17  
140.50  
137.86  
129.34  
122.90  
120.52  
114.92  
108.24

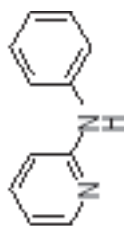

**1s**

WYT-1  
C13CPD CDCl3

NAME XB20120227  
EXPNO 7  
PROCNO 1  
Date\_ 20120227  
Time 11.38  
INSTRUM spect  
PROBHD 5 mm PAIXO 19F  
PULPROG zgpg30  
TD 65536  
SOLVENT CDCl3  
NS 110  
DS 4  
SWH 30030.029 Hz  
FIDRES 0.458222 Hz  
AQ 1.0912410 sec  
RG 114  
DW 16.650 usec  
DE 6.00 usec  
TE 294.8 K  
D1 2.00000000 sec  
d11 0.03000000 sec  
DELTA 1.89999998 sec  
TD0 1

==== CHANNEL f1 =====  
NUC1 13C  
P1 9.50 usec  
PL1 -0.50 dB  
SF01 125.7703643 MHz

==== CHANNEL f2 =====  
CPDPRG2 waltz16  
NUC2 1H  
PCPD2 80.00 usec  
PL2 1.00 dB  
PL12 16.33 dB  
PL13 16.50 dB  
SFO2 500.1320005 MHz  
SI 32768  
SF 125.7577890 MHz  
WDW no  
SSB 0  
LB 0.00 Hz  
GB 0  
PC 0.20

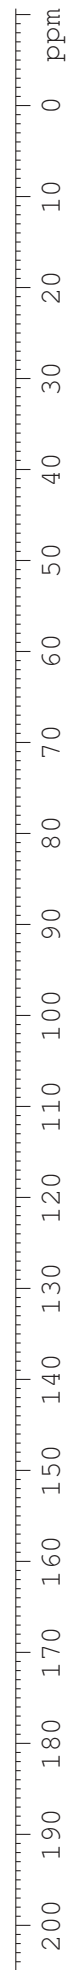

QGY-1-87  
PROTON CDC13

NAME XB20120319  
EXPNO 9  
PROCNO 1  
Date\_ 20120319  
Time 17.17  
INSTRUM spect  
PROBHD 5 mm PATXO 19F  
PULPROG zg30  
TD 65536  
SOLVENT CDC13  
NS 16  
DS 2  
SWH 10330.578 Hz  
FIDRES 0.157632 Hz  
AQ 3.1720407 sec  
RG 406.4  
DW 48.400 usec  
DE 6.00 usec  
TE 293.8 K  
D1 1.00000000 sec  
TD0 1

==== CHANNEL f1 =====  
NUC1 1H  
P1 13.70 usec  
PL1 1.00 dB  
SFO1 500.1330885 MHz  
SI 32768  
SF 500.1300132 MHz  
WDW no  
SSB 0  
LB 0.00 Hz  
GB 0  
PC 1.00

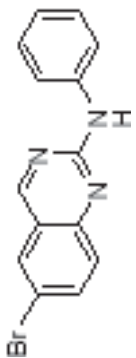

**1t**

7.885  
7.881  
7.819  
7.815  
7.808  
7.801  
7.796  
7.792  
7.644  
7.626  
7.404  
7.388  
7.373  
7.114  
7.099  
7.085

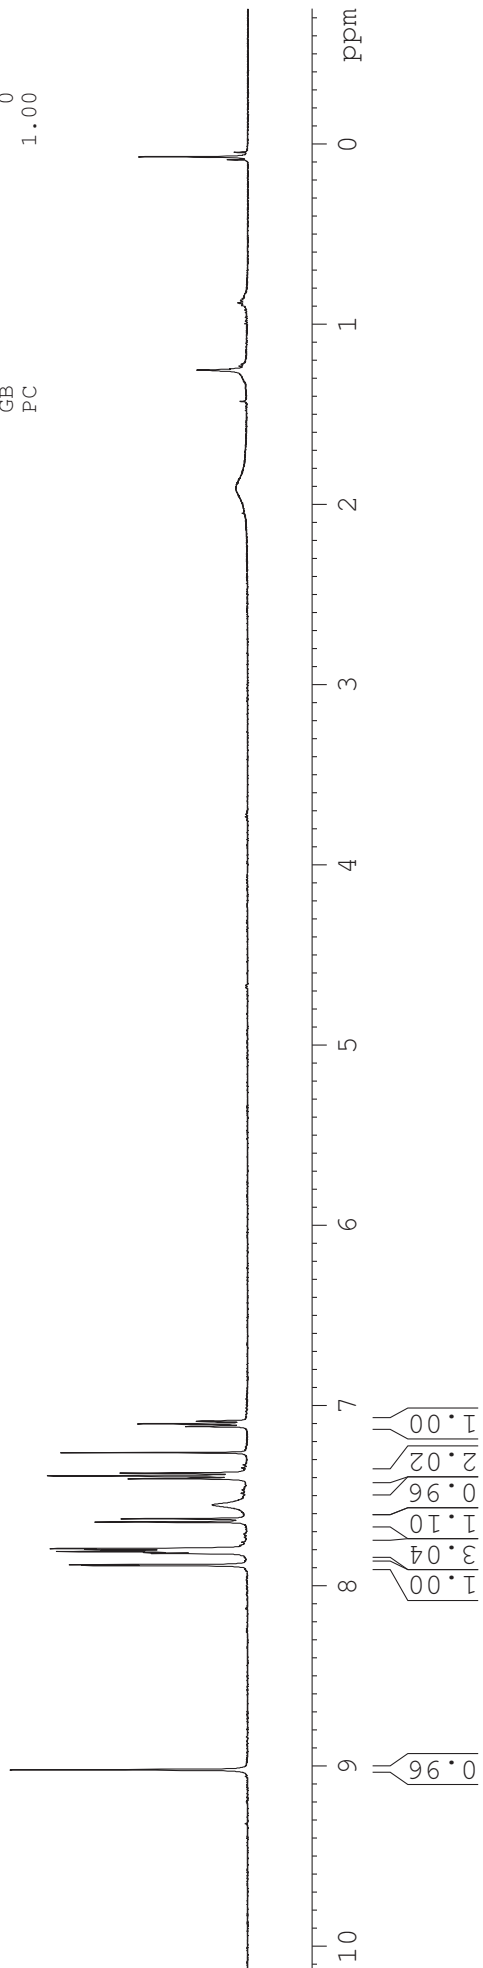



QGY-1-87  
C13CPD CDCl3

NAME XB20120322  
EXPNO 5  
PROCNO 1  
Date\_ 20120322  
Time 10.10  
INSTRUM spect  
PROBHD 5 mm PAXO 19F  
PULPROG zgpg30  
TD 65536  
SOLVENT CDCl3  
NS 128  
DS 4  
SWH 30030.029 Hz  
FIDRES 0.458222 Hz  
AQ 1.0912410 sec  
RG 114  
DW 16.650 usec  
DE 6.00 usec  
TE 295.4 K  
D1 2.00000000 sec  
d11 0.03000000 sec  
DELTA 1.89999998 sec  
TD0 1

==== CHANNEL f1 =====  
NUC1 13C  
P1 9.50 usec  
PL1 -0.50 dB  
SFO1 125.7703643 MHz

==== CHANNEL f2 =====  
CPDPRG2 waltz16  
NUC2 1H  
PCPD2 80.00 usec  
PL2 1.00 dB  
PL12 16.33 dB  
PL13 16.50 dB  
SFO2 500.1320005 MHz  
SI 32768  
SF 125.7577890 MHz  
WDW no  
SSB 0  
LB 0.00 Hz  
GB 0

160.91  
156.84  
150.09  
139.20  
137.73  
129.49  
129.03  
129.03  
128.03  
122.99  
121.72  
119.28  
116.52

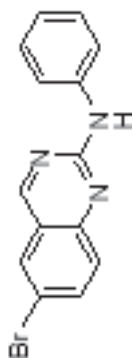

1t

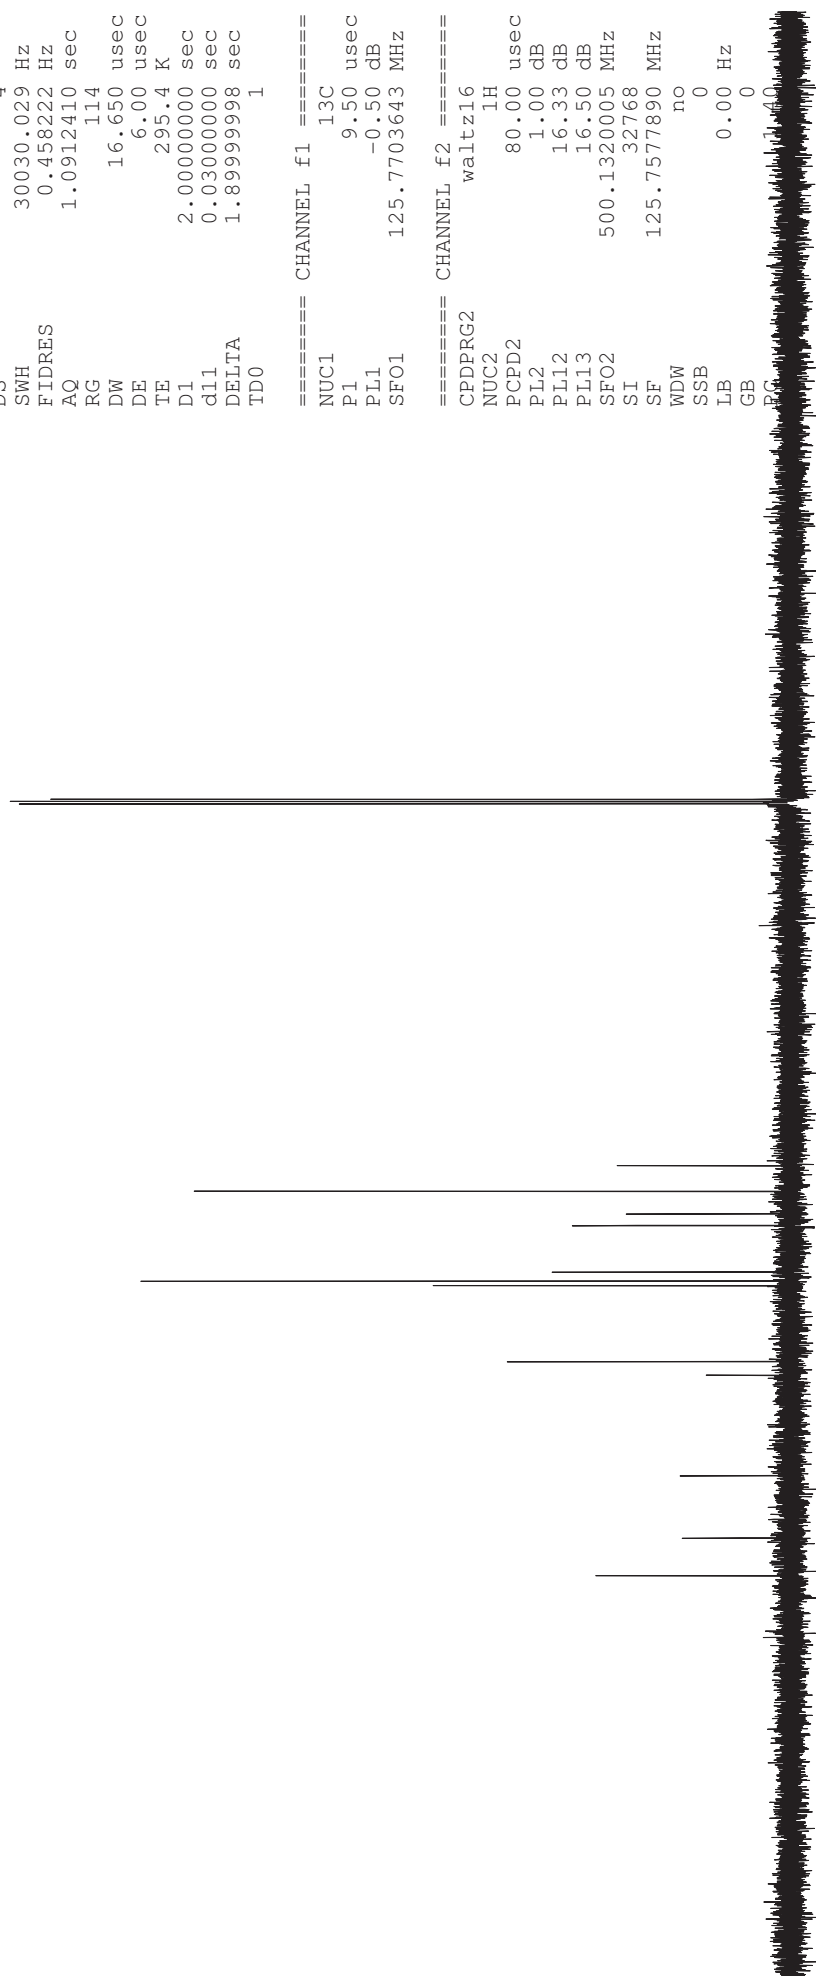

HXM-2-280  
 PROTON CDC13

NAME XB20120504  
 EXPNO 5  
 PROCNO 1  
 Date\_ 20120504  
 Time 15.30  
 INSTRUM spect  
 PROBHD 5 mm PATXO 19F  
 PULPROG zg30  
 TD 65536  
 SOLVENT CDC13  
 NS 16  
 DS 2  
 SWH 10330.578 Hz  
 FIDRES 0.157632 Hz  
 AQ 3.1720407 sec  
 RG 287.4  
 DW 48.400 usec  
 DE 6.00 usec  
 TE 294.8 K  
 D1 1.00000000 sec  
 TD0 1

==== CHANNEL f1 =====  
 NUC1 1H  
 P1 13.72 usec  
 PL1 1.00 dB  
 SF01 500.1330885 MHz  
 SI 32768  
 SF 500.1300129 MHz  
 WDW EM  
 SSB 0  
 LB 0.30 Hz  
 GB 0  
 PC 1.00

2.496

7.946  
7.928  
7.805  
7.788  
7.664  
7.662  
7.646  
7.623  
7.620  
7.609  
7.606  
7.604  
7.592  
7.589  
7.566  
7.564  
7.549  
7.548  
7.397  
7.382  
7.380  
7.365  
7.331  
7.329  
7.315  
7.313  
7.301  
7.299  
7.136  
7.133  
7.132  
7.119  
7.106  
7.104  
7.102  
7.008  
6.990

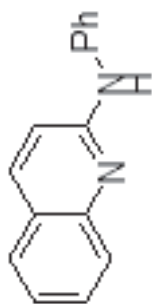

1u

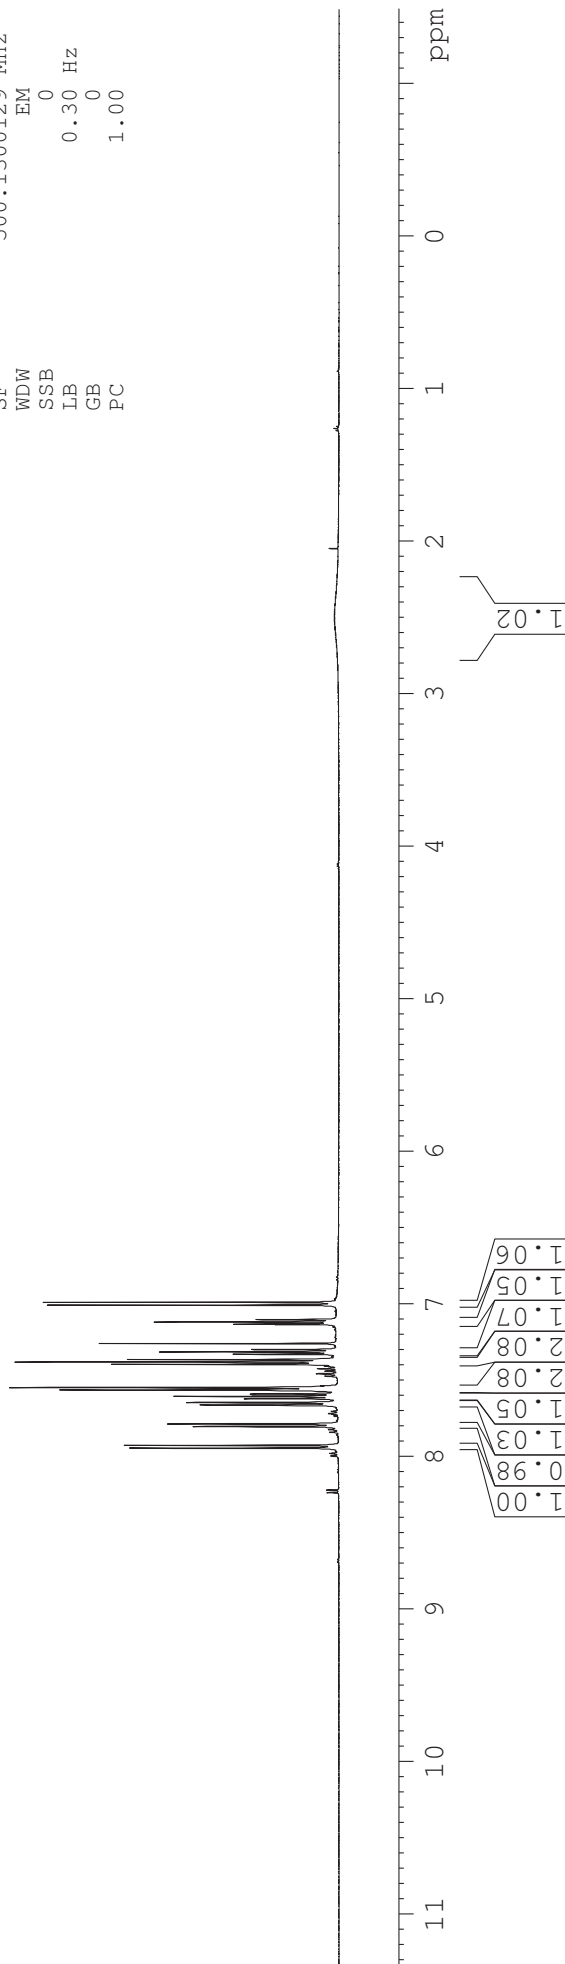

hxm-2-280  
C13CPD CDC13

154.48  
147.59  
140.20  
137.84  
129.87  
129.29  
127.50  
126.66  
124.16  
123.19  
123.18  
120.61  
111.77

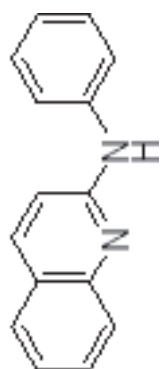

1u

NAME xb20120507  
EXPNO 4  
PROCNO 1  
Date\_ 20120507  
Time 9.57  
INSTRUM spect  
PROBHD 5 mm PATXO 19F  
PULPROG zgpg30  
TD 65536  
SOLVENT CDC13  
NS 128  
DS 4  
SWH 30030.029 Hz  
FIDRES 0.458222 Hz  
AQ 1.0912410 sec  
RG 143.7  
DW 16.650 usec  
DE 6.00 usec  
TE 296.2 K  
D1 2.00000000 sec  
d11 0.03000000 sec  
DELTA 1.89999998 sec  
TD0 1

==== CHANNEL f1 =====  
NUC1 13C  
P1 9.50 usec  
PL1 -0.50 dB  
SFO1 125.7703643 MHz  
  
==== CHANNEL f2 =====  
CPDPRG2 waltz16  
NUC2 1H  
PCPD2 80.00 usec  
PL2 1.00 dB  
PL12 16.31 dB  
PL13 16.50 dB  
SFO2 500.1320005 MHz  
SI 32768  
SF 125.7577890 MHz  
WDW EM  
SSB 0  
LB 1.00 Hz  
GB 0  
PC 1.40

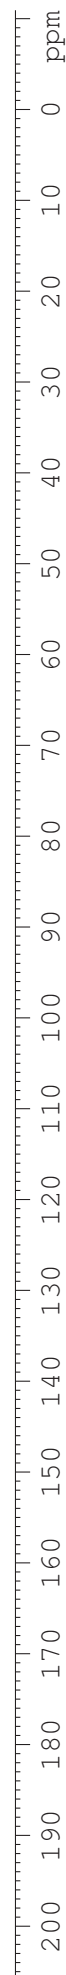

XHM-2-126  
PROTON CDC13

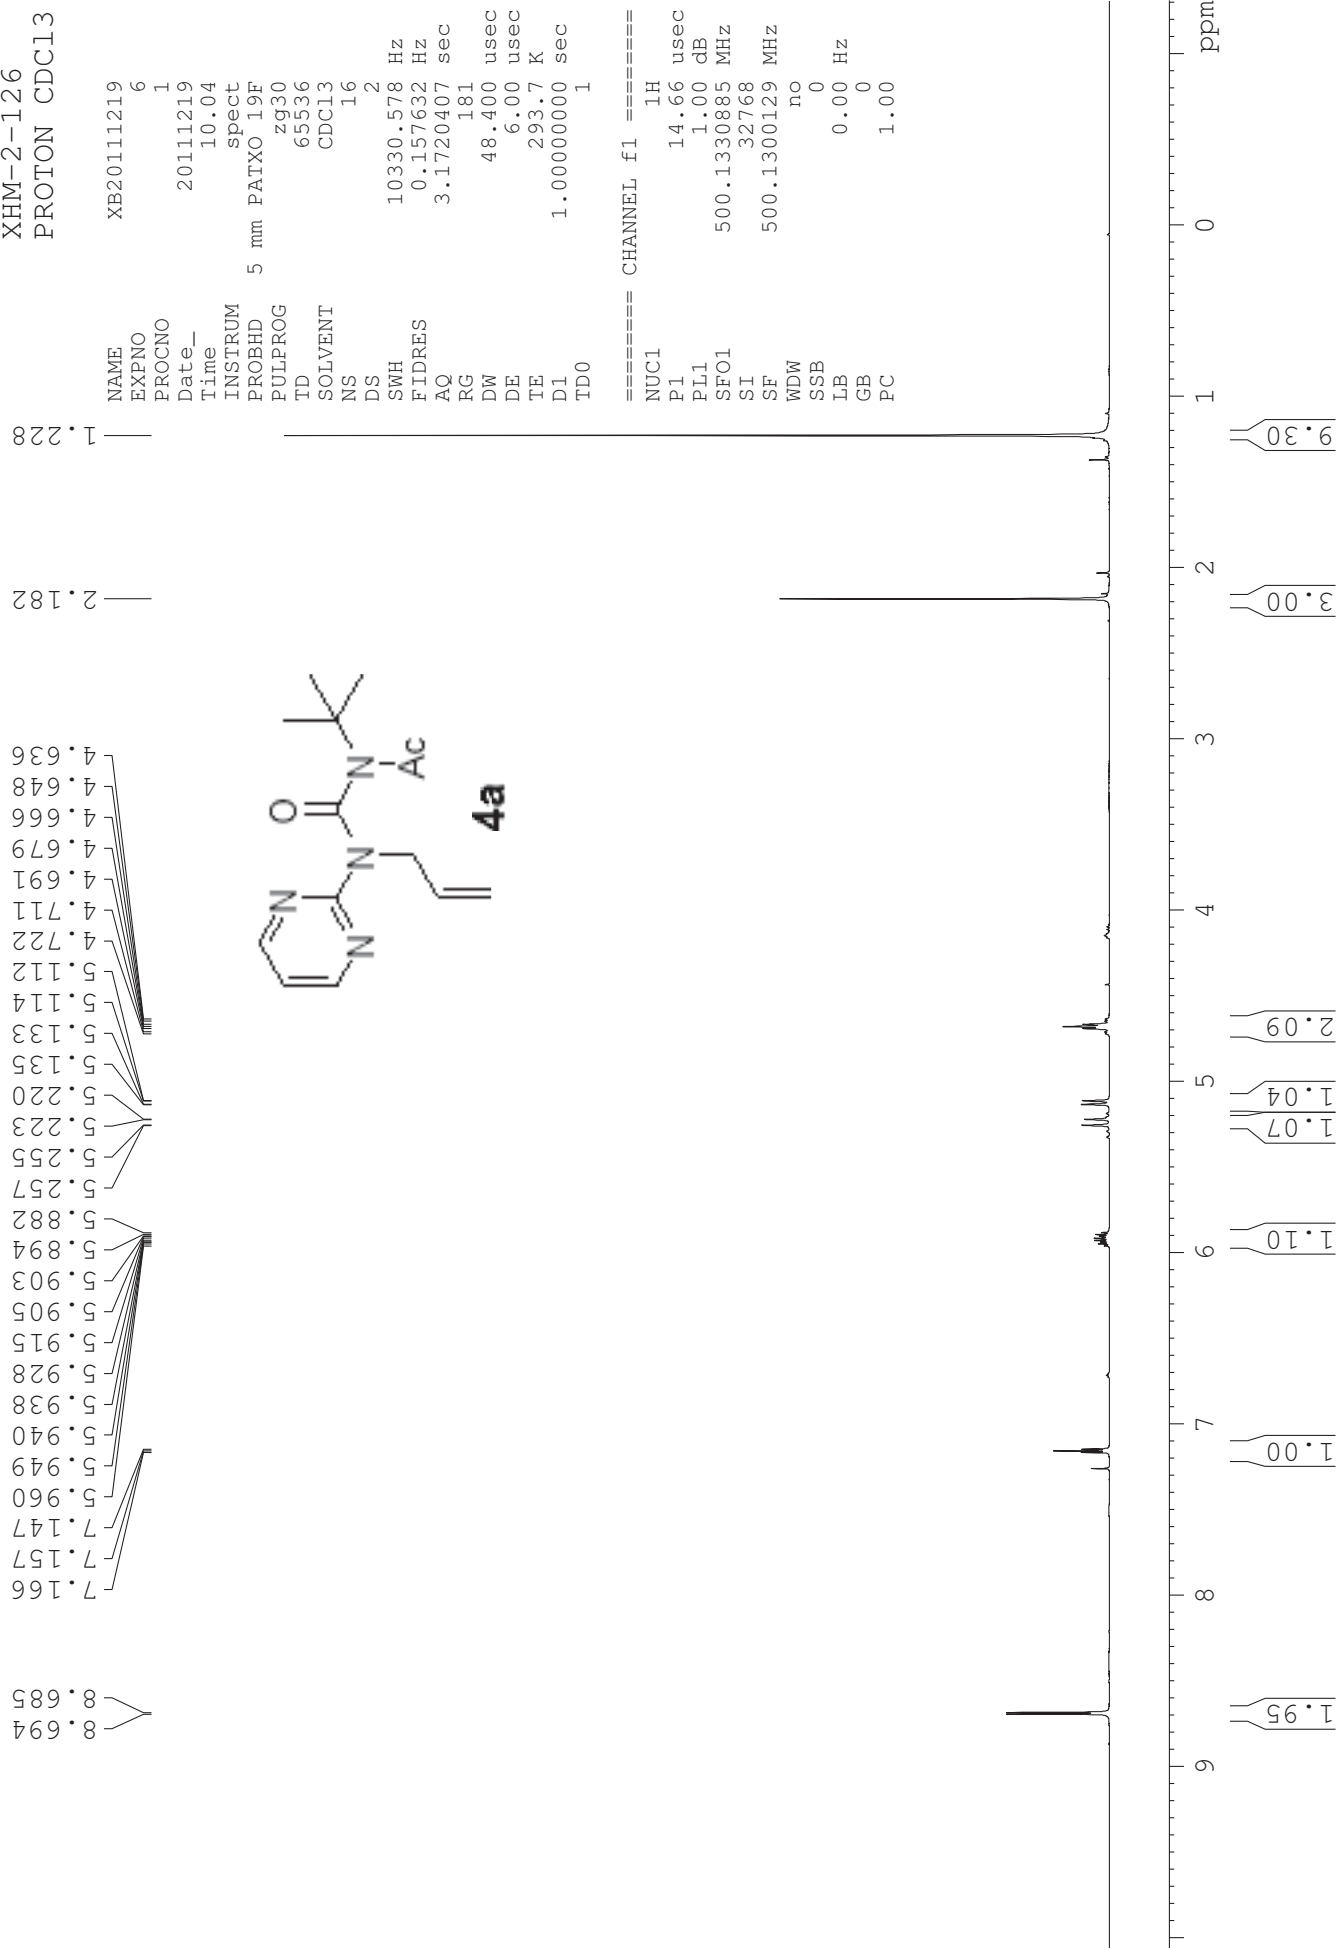

HXM-2-126  
C13CPD CDC13

Current Data Parameters  
NAME XB20111220  
EXPNO 3  
PROCNO 1

F2 - Acquisition Parameters  
Date\_ 20111220  
Time 10.24  
INSTRUM spect  
PROBHD 5 mm PATXO 19F  
PULPROG zgpg30  
TD 65536  
SOLVENT CDC13  
NS 128  
DS 4  
SWH 30030.029 Hz  
FIDRES 0.458222 Hz  
AQ 1.0912410 sec  
RG 114  
DM 16.650 usec  
DE 6.00 usec  
TE 295.0 K  
D1 2.00000000 sec  
d11 0.03000000 sec  
DELTA 1.89999998 sec  
TD0 1

==== CHANNEL f1 =====  
NUC1 13C  
P1 9.50 usec  
PL1 -0.50 dB  
SFO1 125.7703643 MHz

==== CHANNEL f2 =====  
CPDPRG2 waltz16  
NUC2 1H  
PCPD2 80.00 usec  
PL2 2.00 dB  
PL12 16.50 dB  
PL13 16.50 dB  
SFO2 500.1320005 MHz

F2 - Processing parameters  
SI 32768  
SF 125.7577890 MHz  
WDW EM  
SSB 0  
LB 1.00 Hz  
GB 0  
PC 1.40

169.86  
160.16  
158.28  
156.44  
131.95  
118.62  
118.40  
58.30  
50.76  
27.61  
25.34

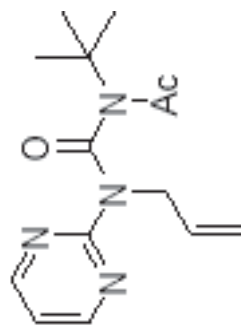

169.86  
160.16  
158.28  
156.44  
131.95  
118.62  
118.40

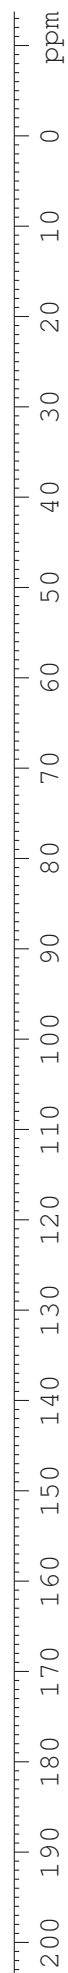

HXM-2-113  
 PROTON CDC13

0.866  
 0.881  
 0.896  
 1.207  
 1.281  
 1.296  
 1.311  
 1.326  
 1.341  
 1.355  
 1.543  
 1.557  
 1.559  
 1.569  
 1.573  
 1.583  
 1.585  
 1.599  
 1.611  
 1.624  
 1.640  
 1.651  
 1.666  
 1.682  
 2.185  
 4.026  
 4.031  
 4.039  
 4.042  
 4.045  
 4.055  
 4.061

7.154  
 7.164  
 7.174  
 8.692  
 8.701

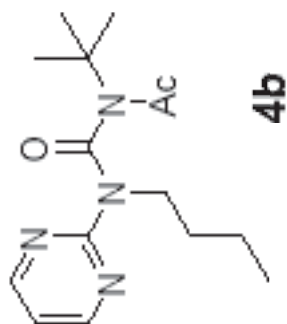

NAME xb20111208  
 EXPNO 10  
 PROCNO 1  
 Date\_ 20111208  
 Time 16.49  
 INSTRUM spect  
 PROBHD 5 mm PAXO 19F  
 PULPROG zg30  
 TD 65536  
 SOLVENT CDC13  
 NS 16  
 DS 2  
 SWH 10330.578 Hz  
 FIDRES 0.157632 Hz  
 AQ 3.1720407 sec  
 RG 161.3  
 DW 48.400 usec  
 DE 6.00 usec  
 TE 293.8 K  
 D1 1.00000000 sec  
 TD0 1  
 ===== CHANNEL f1 =====  
 NUC1 1H  
 P1 14.66 usec  
 PL1 1.00 dB  
 SFO1 500.1330885 MHz  
 SI 32768  
 SF 500.1300132 MHz  
 WDW no  
 SSB 0  
 LB 0.00 Hz  
 GB 0  
 PC 1.00

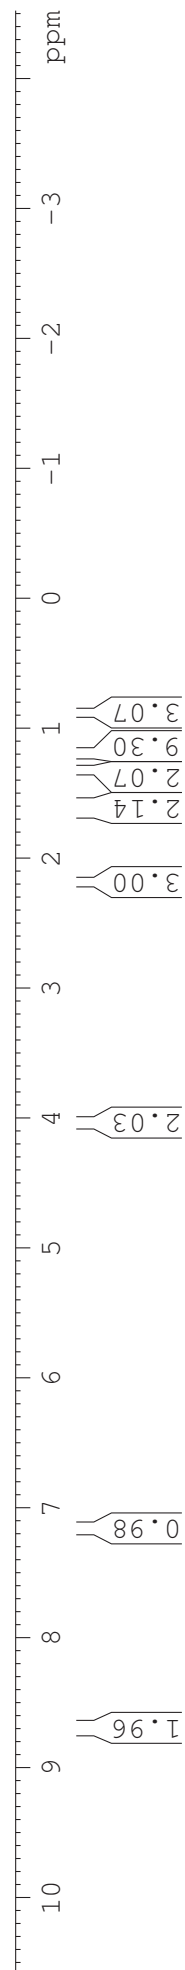

HXM-2-113  
C13CPD CDC13

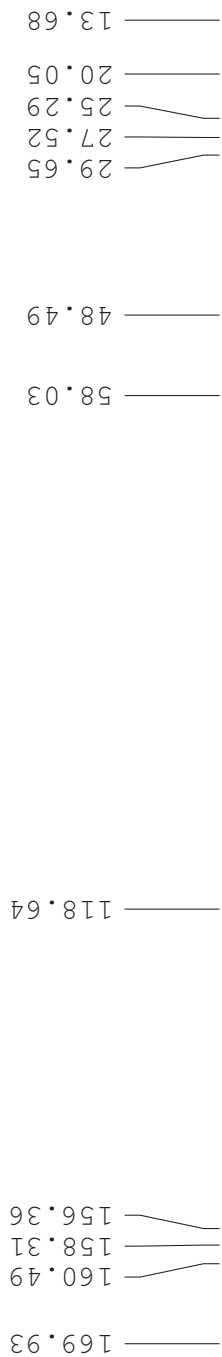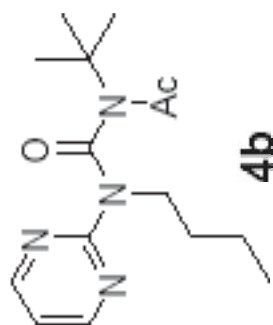

Current Data Parameters  
NAME XB20111209  
EXNO 6  
PROCNO 1

F2 - Acquisition Parameters  
Date\_ 20111209  
Time\_ 16.26  
INSTRUM spect  
PROBHD 5 mm PATXO 19F  
PULPROG zgpg30  
TD 65536  
SOLVENT CDC13  
NS 128  
DS 4  
SWH 30030.029 Hz  
FIDRES 0.45822 Hz  
AQ 1.0912416 sec  
RG 114  
WDW 16.650 usec  
DE 6.00 usec  
TE 294.6 K  
D1 2.00000000 sec  
d11 0.03000000 sec  
DELTA 1.89999998 sec  
TD0 1

==== CHANNEL f1 =====  
NUC1 13C  
P1 9.50 usec  
PL1 -0.50 dB  
SFO1 125.7703643 MHz

==== CHANNEL f2 =====  
CPDPRG2 waltz16  
NUC2 1H  
PCPD2 80.00 usec  
PL2 2.00 dB  
PL12 16.50 dB  
PL13 16.50 dB  
SFO2 500.1320005 MHz

F2 - Processing parameters  
SI 32768  
SF 125.7577890 MHz  
WDW no  
SSB 0  
LB 0  
GB 0  
PC 1.40

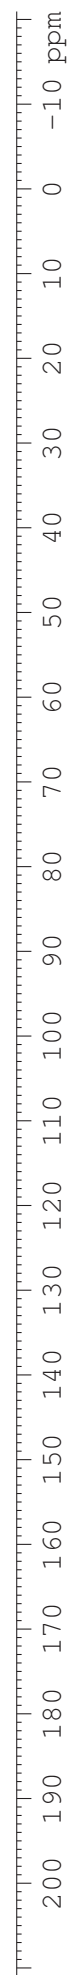

HXM-2-121  
PROTON CDC13

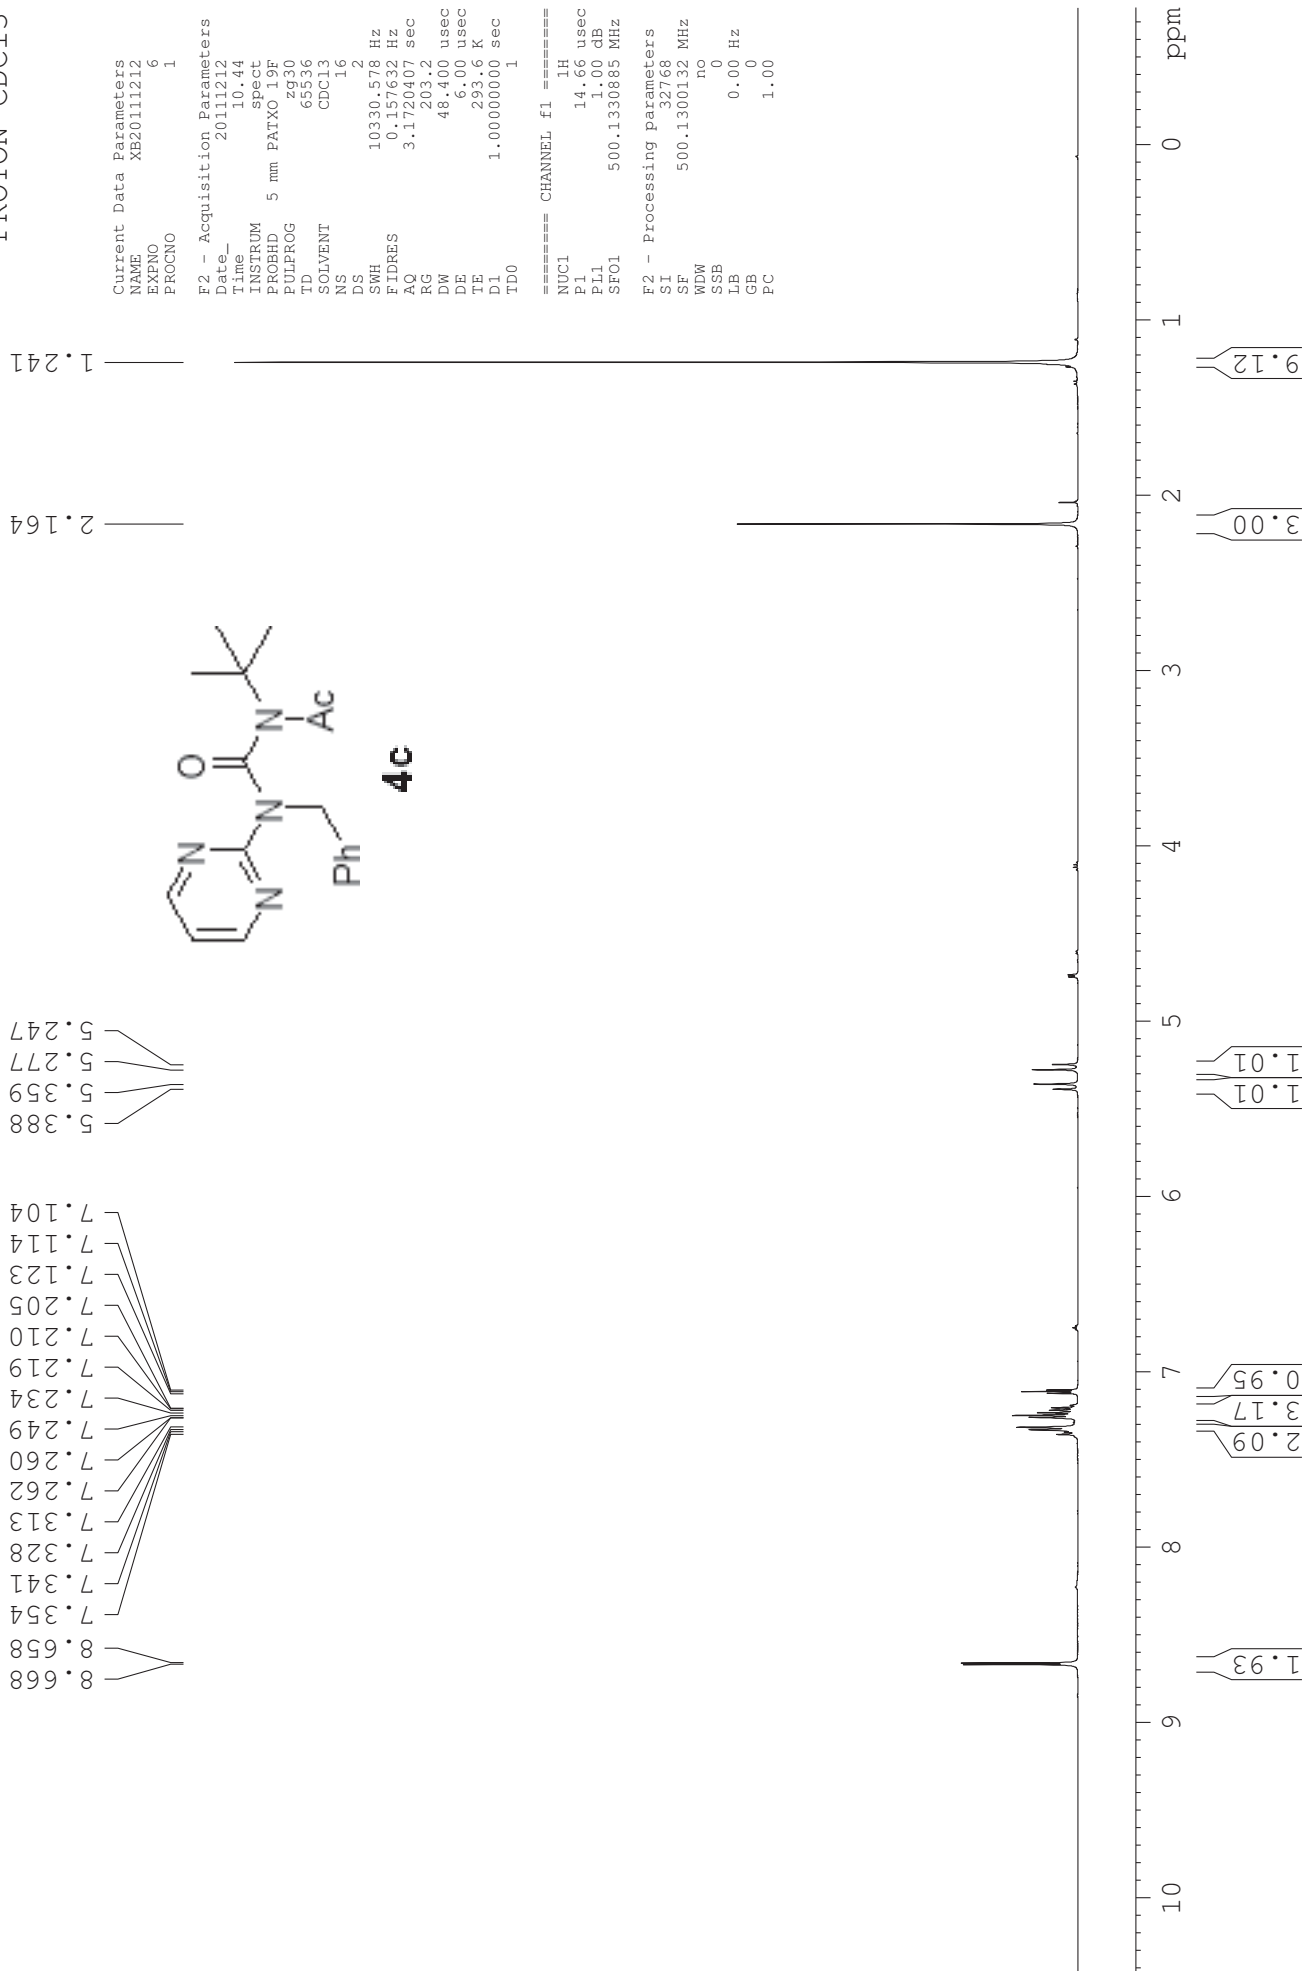



HXM-2-121  
C13CPD CDCl3

Current Data Parameters  
NAME XB20111212  
EXPNO 17  
PROCNO 1

F2 - Acquisition Parameters  
Date\_ 20111212  
Time 16.49  
INSTRUM spect  
PROBHD 5 mm PATXO 19F  
PULPROG zgpg30  
ID 65336  
SOLVENT CDCl3  
NS 128  
DS 4  
SWH 30030.029 Hz  
FIDRES 0.458222 Hz  
AQ 1.0912410 sec  
RG 114  
DW 16.650 usec  
DE 6.00 usec  
TE 294.8 K  
D1 2.00000000 sec  
d11 0.03000000 sec  
DELTA 1.89999998 sec  
TD0 1

==== CHANNEL f1 =====  
NUC1 13C  
P1 9.50 usec  
PL1 -0.50 dB  
SFO1 125.7703643 MHz

==== CHANNEL f2 =====  
CPDPRG2 waitz16  
NUC2 1H  
PCPD2 80.00 usec  
PL2 2.00 dB  
PL12 16.50 dB  
PL13 16.50 dB  
SFO2 500.1320005 MHz

F2 - Processing parameters  
SI 32768  
SF 125.7577890 MHz  
WDW no  
SSB 0  
LB 0.00 Hz  
GB 0  
PC 1.40

25.40  
27.60

51.57  
58.37

118.60  
127.58  
128.28  
128.46  
136.34  
156.90  
158.27  
160.05  
169.90

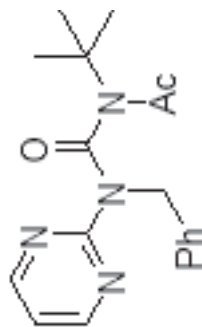

**4c**

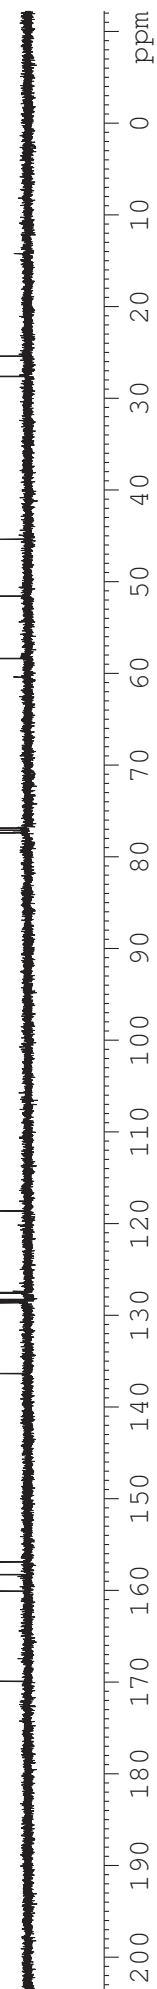

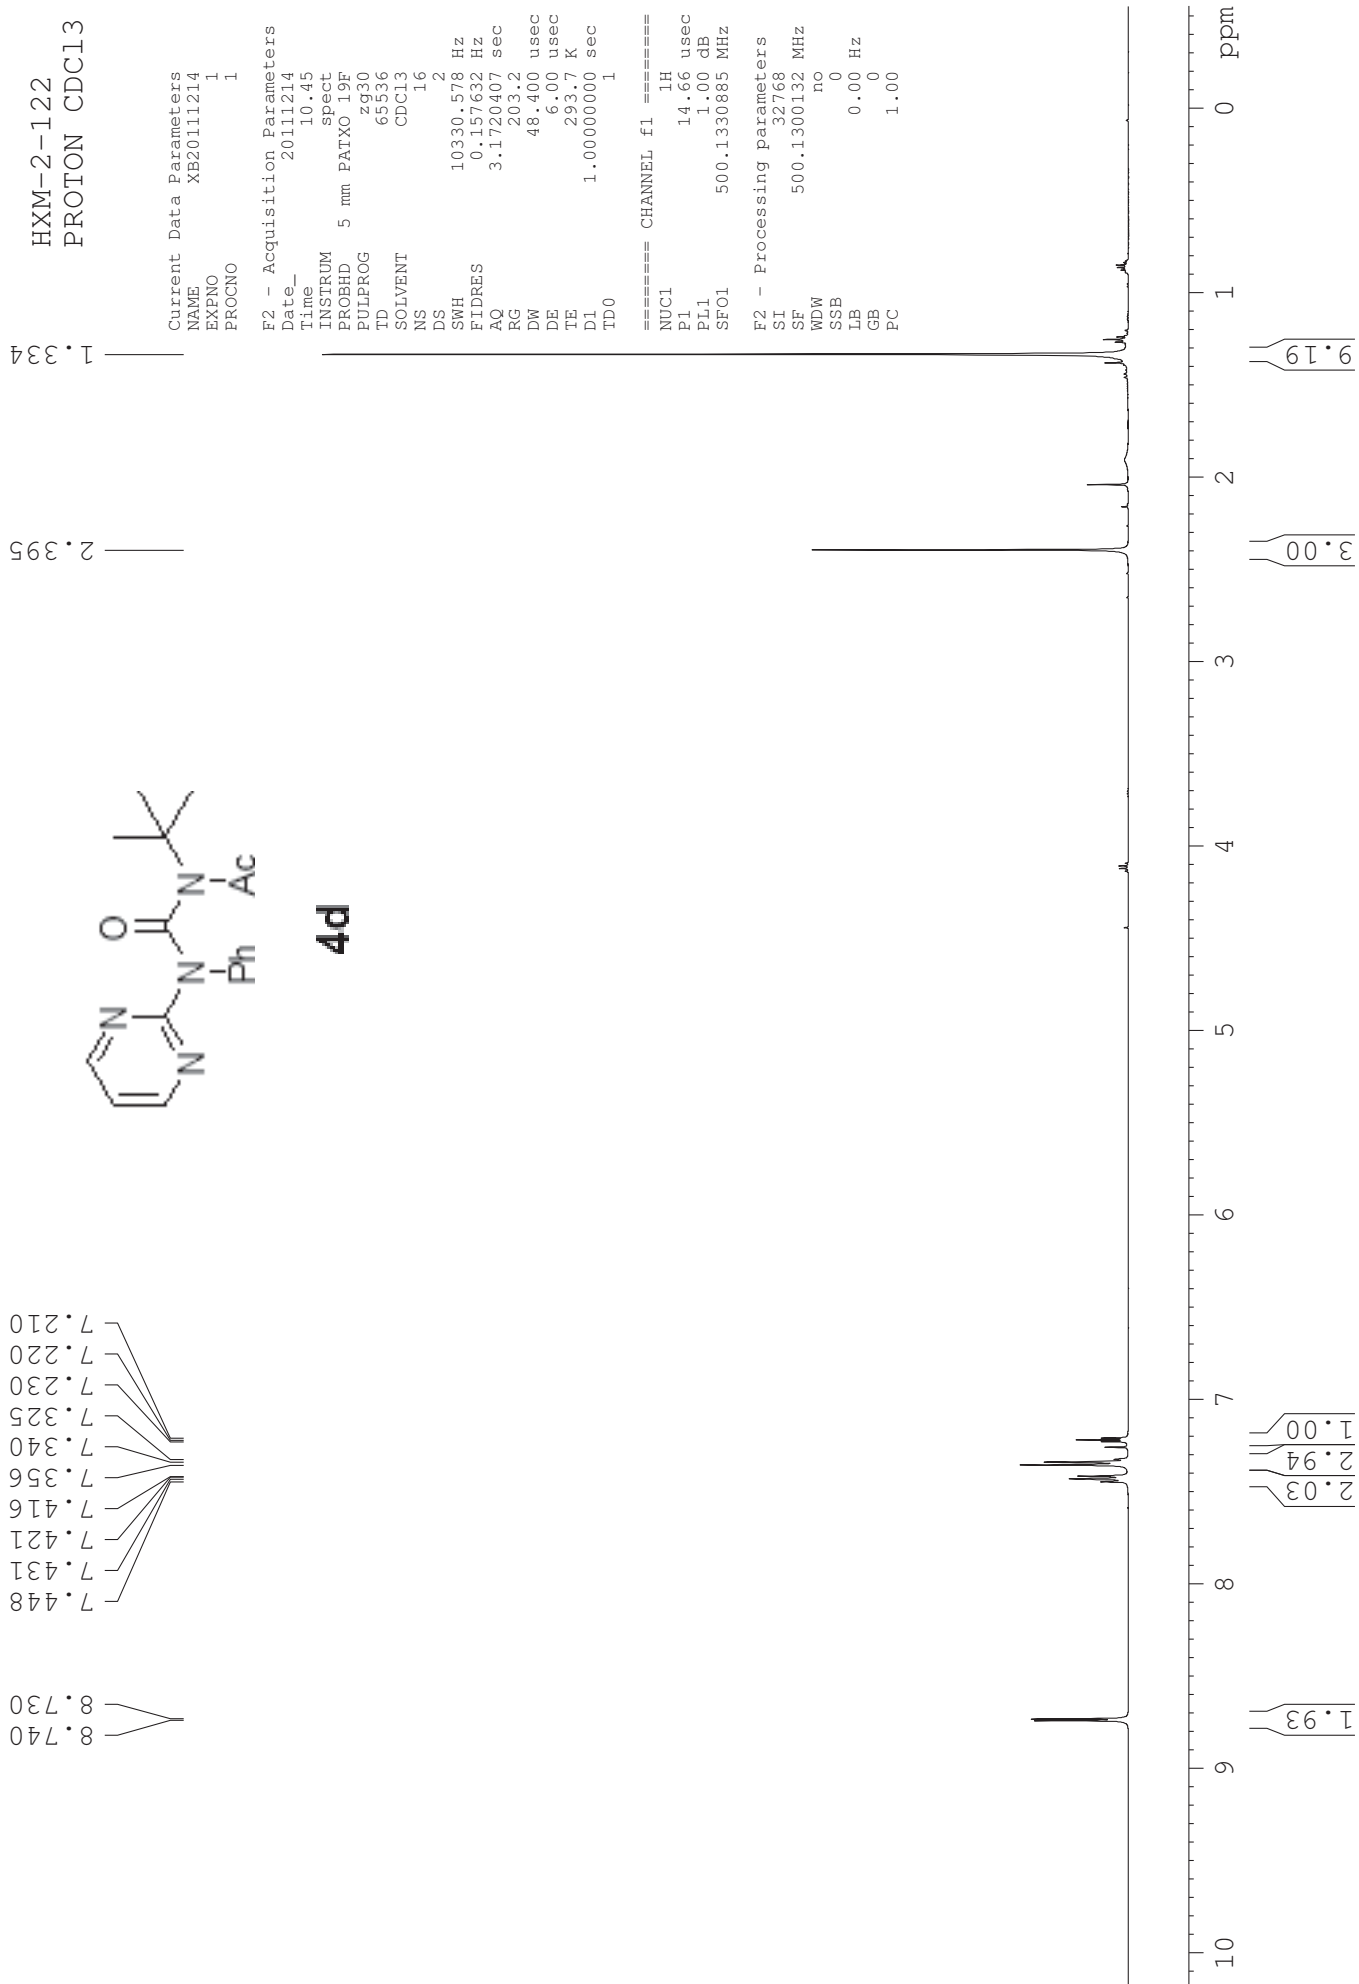

HXM-2-122  
C13CPD CDCl3

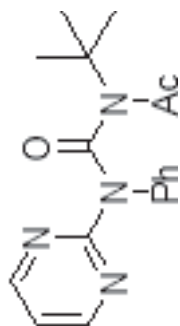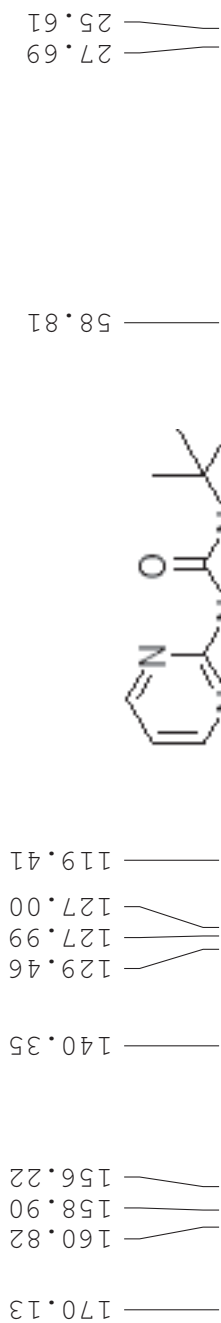

Current Data Parameters  
NAME XBZ0111214  
EXPNO 3  
PROCNO 1

F2 - Acquisition Parameters  
Date\_ 20111214  
Time 11.01  
INSTRUM spect  
PROBHD 5 mm PAXO 19F  
PULPROG zgpg30  
ID 65536  
SOLVENT CDCl3  
NS 128  
DS 4  
SWH 30030.029 Hz  
FIDRES 0.458222 Hz  
AQ 1.0912410 sec  
RG 114  
DW 16.650 usec  
DE 6.00 usec  
TE 295.0 K  
D1 2.00000000 sec  
d11 0.03000000 sec  
DELTA 1.89999998 sec  
TD0 1

==== CHANNEL f1 =====  
NUC1 13C  
P1 9.50 usec  
PL1 -0.50 dB  
SFO1 125.7703643 MHz

==== CHANNEL f2 =====  
CPDPRG2 waltz16  
NUC2 1H  
PCPD2 80.00 usec  
PL2 2.00 dB  
PL12 16.50 dB  
PL13 16.50 dB  
SFO2 500.1320005 MHz

F2 - Processing Parameters  
SI 32768  
SF 125.7577890 MHz  
WDW no  
SSB 0  
LB 0.00 Hz  
GB 0  
FC 1.40

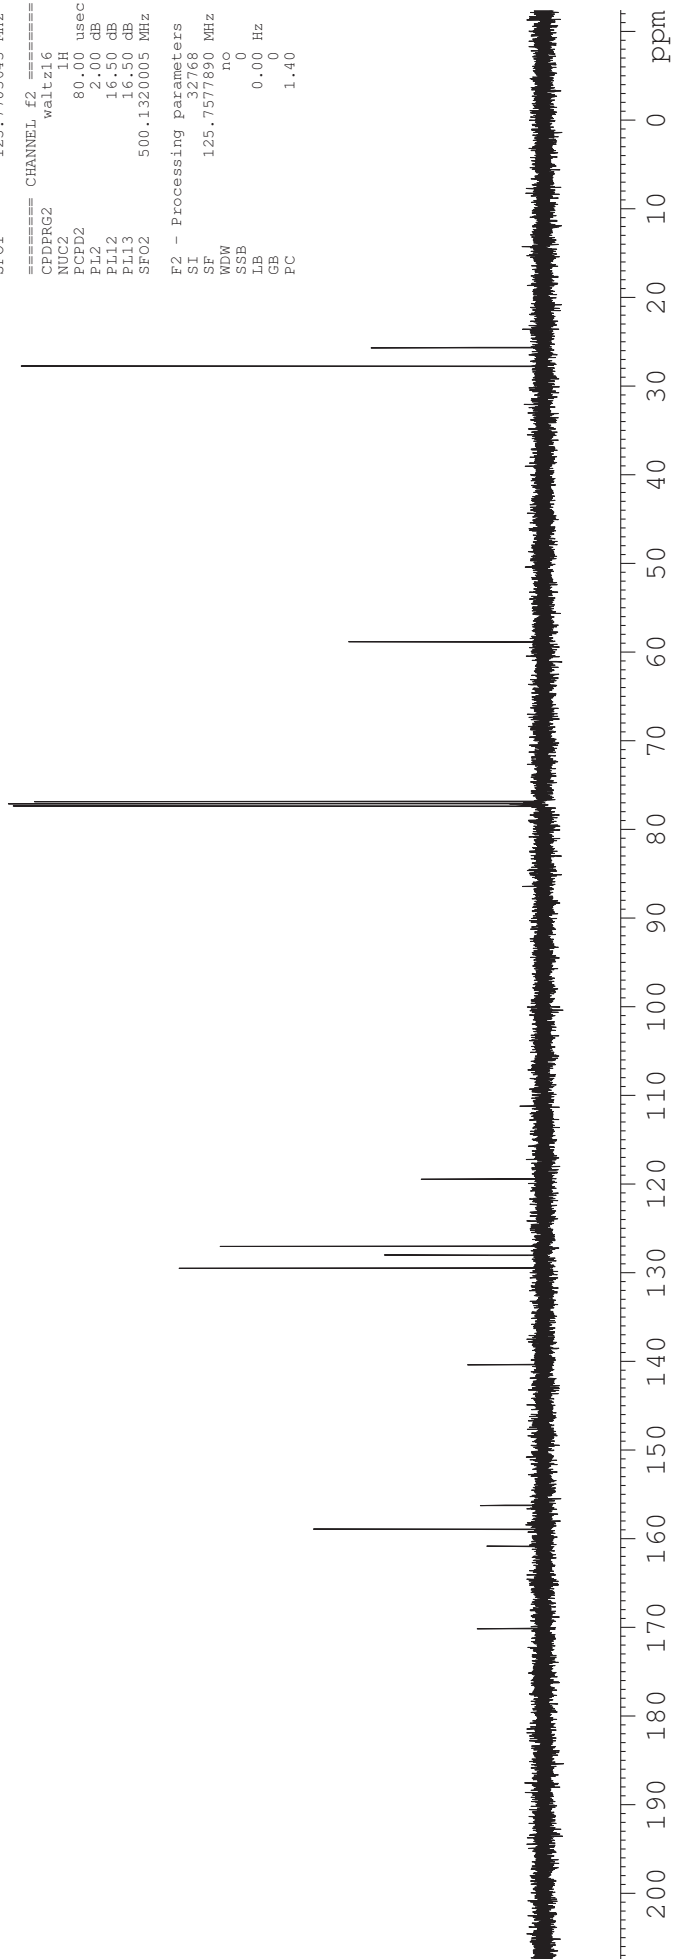

HXM-2-114  
PROTON CDCl3 I

Current Data Parameters  
NAME XB20111208  
EXPNO 3  
PROCNO 1

F2 - Acquisition Parameters  
Date\_ 20111208  
Time 10.19  
INSTRUM spect  
PROBHD 5 mm PATXO 19F  
PULPROG zg30  
TD 65536  
SOLVENT CDCl3  
NS 16  
DS 2  
SWH 10330.578 Hz  
FIDRES 0.157632 Hz  
AQ 3.1720407 sec  
RG 322.5  
DW 48.400 usec  
DE 6.00 usec  
TE 293.7 K  
D1 1.00000000 sec  
TD0 1

==== CHANNEL f1 =====  
NUC1 1H  
P1 14.66 usec  
PL1 1.00 dB  
SFO1 500.1330885 MHz  
F2 - Processing parameters  
SI 32768  
SF 500.1300133 MHz  
WDW no  
SSB 0  
LB 0.00 Hz  
GB 0  
PC 1.00

1.331

2.384  
2.360

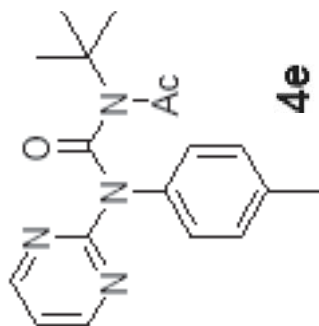

7.233  
7.214  
7.204  
7.194

8.733  
8.723

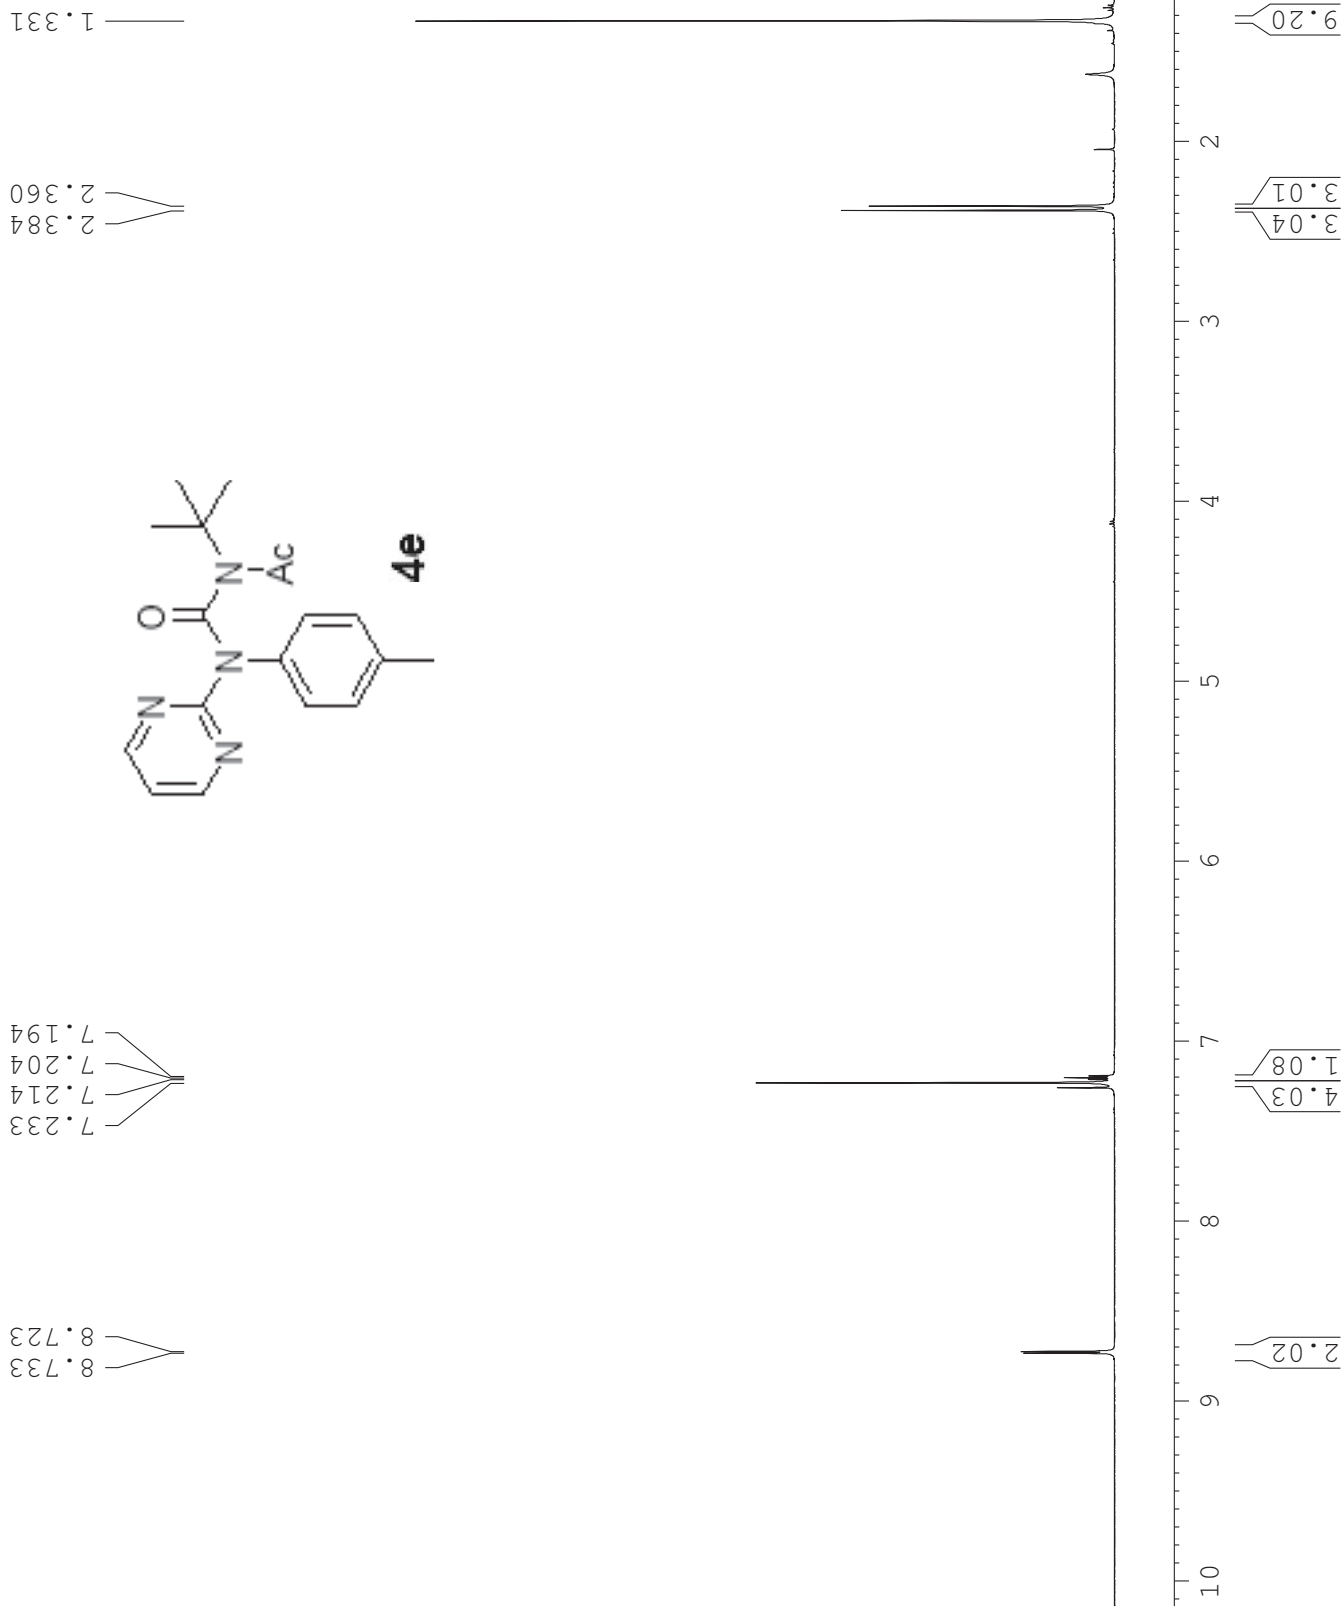

HXM-2-104  
C13CPD CDC13

Current Data Parameters  
NAME XE20111205  
EXPNO 5  
PROCNO 1

F2 - Acquisition Parameters  
Date\_ 20111205  
Time 10.49  
INSTRUM spect  
PROBHD 5 mm PAIXO 19F  
PULPROG zgpg30  
TD 65536  
SOLVENT CDC13  
NS 128  
DS 4  
SWH 30030.022 Hz  
FIDRES 0.468222 Hz  
AQ 1.0932410 sec  
RG 456.1  
DM 16.650 usec  
DE 6.00 usec  
TE 294.9 K  
D1 2.00000000 sec  
d11 0.03000000 sec  
DELTA 1.89999998 sec  
TD0 1

===== CHANNEL f1 =====  
NUC1 <sup>13</sup>C  
P1 9.50 usec  
PL1 0.50 dB  
SFO1 125.7703645 MHz

===== CHANNEL f2 =====  
CPDPRG2 waitz16  
NUC2 <sup>1</sup>H  
PCPD2 80.00 usec  
PL2 2.00 dB  
PL12 16.50 dB  
PL13 16.50 dB  
SFO2 500.1320005 MHz

F2 - Processing parameters  
SI 32768  
SF 125.7577889 MHz  
WDW EM  
SSB 0  
GB 1.00 Hz  
PC 1.40

27.69  
25.61  
21.19

58.74

170.11  
160.93  
158.84  
156.29  
138.04  
137.77  
130.12  
126.79  
119.24

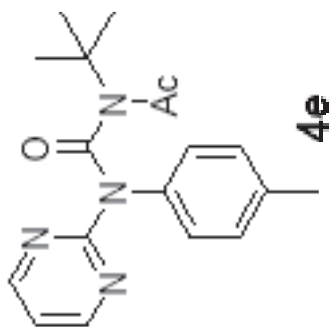

200 190 180 170 160 150 140 130 120 110 100 90 80 70 60 50 40 30 20 10 0 ppm

HXM-2-117  
PROTON CDCl3

Current Data Parameters  
NAME XE20111212  
EXPNO 12  
PROCNO 1

F2 - Acquisition Parameters  
Date\_ 20111212  
Time 16.19  
INSTRUM spect  
PROBHD 5 mm PATXO 19F  
PULPROG zg30  
TD 65536  
SOLVENT CDCl3  
NS 16  
DSH 10330.672 Hz  
SVDRES 0.157632 Hz  
AQ 3.1720407 sec  
RG 203.2  
DM 48.400 usec  
DE 6.00 usec  
TE 293.6 K  
D1 1.00000000 sec  
TD0 1

===== CHANNEL f1 =====  
NUC1 1H  
P1 14.66 usec  
PL 1.00 dB  
SFO1 500.1330885 MHz

F2 - Processing Parameters  
SI 32768  
SF 500.1300132 MHz  
WDW no  
SSB 0  
LB 0.00 Hz  
GB 0  
PC 1.00

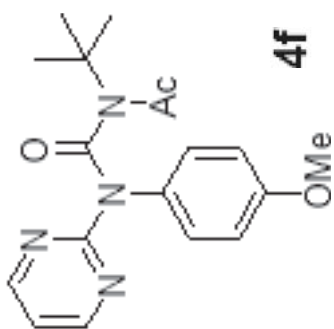

8.727  
8.718

7.293  
7.275  
7.210  
7.210  
7.200  
7.190  
6.945  
6.927

3.802

2.382

1.322

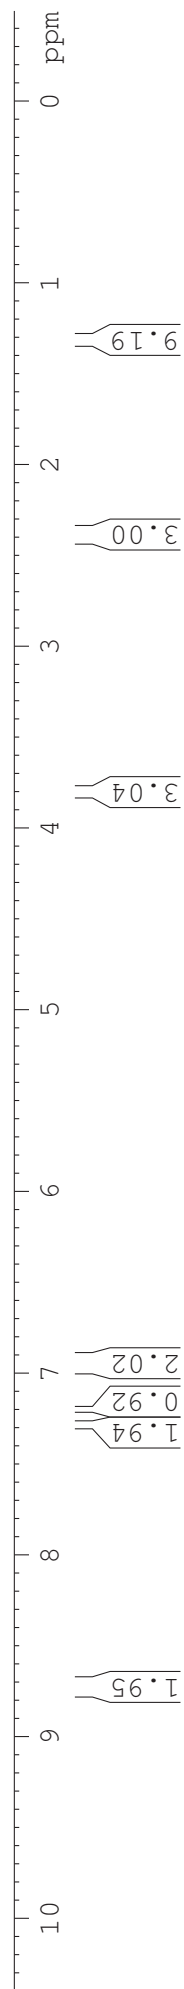

HXM-2-117  
 C13CPD CDCl3

NAME XB20111213  
 EXPNO 3  
 PROCNO 1  
 Date\_ 20111213  
 Time 10:59  
 INSTRUM spect  
 PROBHD 5 mm PATXO.19F  
 PULPROG zgpg30  
 ID 65536  
 SOLVENT CDCl3  
 NS 128  
 DS 4  
 SWH 30030.029 Hz  
 FIDRES 0.458222 Hz  
 AQ 1.0912410 sec  
 RG 114  
 DW 16.650 usec  
 DE 6.00 usec  
 TE 294.9 K  
 D1 2.00000000 sec  
 d11 0.03000000 sec  
 DELTA 1.89999998 sec  
 TD0 1

==== CHANNEL f1 =====  
 NUC1 13C  
 P1 9.50 usec  
 PL1 -0.50 dB  
 SFO1 125.7703643 MHz

==== CHANNEL f2 =====  
 CPDPRG2 waltz16  
 NUC2 1H  
 PCPD2 80.00 usec  
 PL2 2.00 dB  
 PL12 16.50 dB  
 PL13 16.50 dB  
 SFO2 500.1320005 MHz  
 SI 32768  
 SF 125.7577890 MHz  
 WDW no  
 SSB 0  
 LB 0.00 Hz  
 GB 0  
 FC 1.40

27.67  
 25.57

58.66  
 55.48

170.05  
 160.88  
 159.02  
 158.85  
 156.41  
 133.03  
 128.30  
 119.28  
 114.68

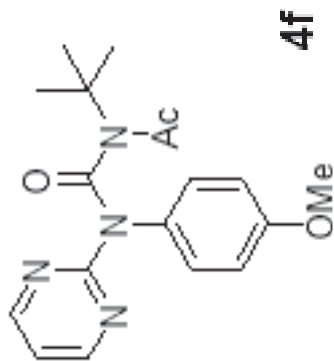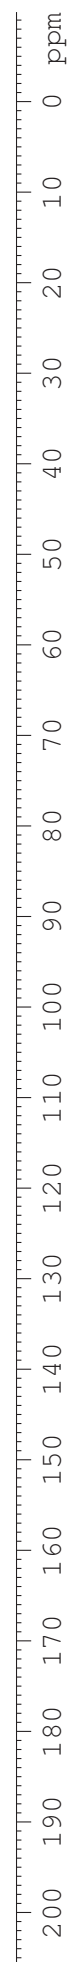

HXM-1-141  
PROTON CDCl3

Current Data Parameters  
NAME XB20111229  
EXPNO 14  
PROCNO 1

F2 - Acquisition Parameters  
Date\_ 20111229  
Time 16.51  
INSTRUM spect  
PROBHD 5 mm PAXY 19F  
PULPROG zg30  
TD 65536  
SOLVENT CDCl3  
NS 8  
DS 2  
SWH 10330.578 Hz  
FIDRES 0.157632 Hz  
AQ 3.1720407 sec  
RG 114  
DW 48.400 usec  
DE 6.00 usec  
TE 293.8 K  
D1 1.0000000 sec  
TD0 1

==== CHANNEL f1 =====  
NUC1 1H  
P1 14.66 usec  
PL1 1.00 dB  
SF01 500.1330885 MHz

F2 - Processing parameters  
SI 32768  
SF 500.1300128 MHz  
WDW nc  
SSB 0  
LB 0.00 Hz  
GB 0  
PC 1.00

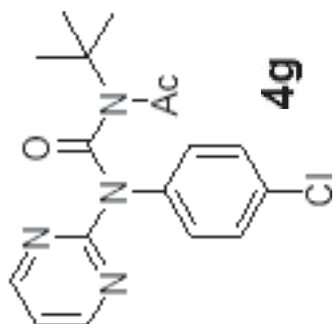

8.732  
8.723

7.393  
7.380  
7.276  
7.273  
7.273  
7.245  
7.235  
7.225

2.359

1.310

1.93  
1.98  
0.95

1.92

3.00

9.03

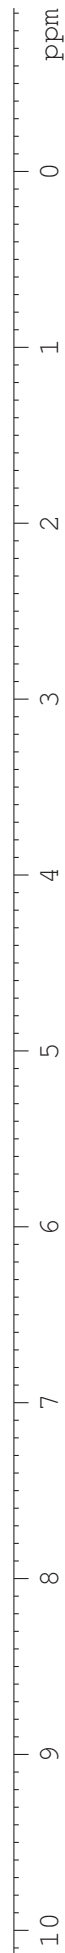



HXM-1-141  
C13CPD CDC13

```
Current Data Parameters
NAME      XB20111229
EXPNO     16
PROCNO    1

F2 - Acquisition Parameters
Date_     20111229
Time      17.01
INSTRUM   spect
PROBHD    5 mm PAXO 1H
PULPROG   zgpg30
TD         65536
SOLVENT   CDCl3
NS         128
DS         4
SWH        30030.029 Hz
FIDRES     0.458222 Hz
AQ          1.0912410 sec
RG          228.1
DQ          16.650 usec
DE          6.00 usec
TE          295.1 K
d1         2.0000000 sec
d11        0.0300000 sec
DELTA      1.8999998 sec
TD0        1

===== CHANNEL f1 =====
NUC1       13C
PI         9.50 usec
PL1        -0.50 dB
SFO1       125.7703643 MHz

===== CHANNEL f2 =====
CPDPRG2   waltz16
NUC2       1H
PCPD2      80.00 usec
PL2         2.00 dB
PL12       16.50 dB
PL13       16.50 dB
SFO2       500.1320005 MHz

F2 - Processing parameters
SI         32768
SF         125.7577890 MHz
WDW        EM
SSB        0
LB         1.00 Hz
GB         0
PC         1.40
```

27.67  
25.56

58.88

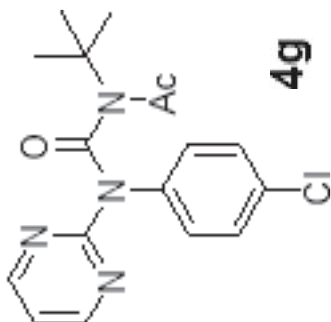

119.59

128.37

129.63

133.77

138.78

156.23

158.97

160.51

169.96

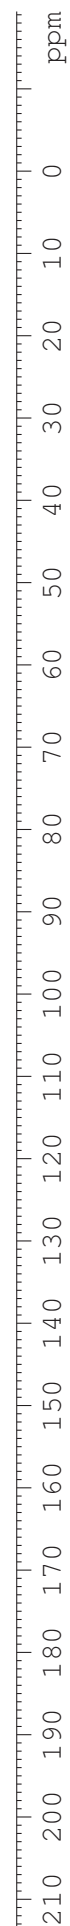

HXM-2-150  
 PROTON CDC13

NAME XB20120110  
 EXPNO 1  
 PROCNO 1  
 Date\_ 20120110  
 Time 8.40  
 INSTRUM spect  
 PROBHD 5 mm PATXO 19F  
 PULPROG zg30  
 TD 65536  
 SOLVENT CDC13  
 NS 8  
 DS 2  
 SWH 10330.578 Hz  
 FIDRES 0.157632 Hz  
 AQ 3.1720407 sec  
 RG 128  
 DW 48.400 usec  
 DE 6.00 usec  
 TE 293.5 K  
 D1 1.00000000 sec  
 TD0 1

==== CHANNEL f1 =====  
 NUC1 1H  
 P1 13.65 usec  
 PL1 1.00 dB  
 SFO1 500.1330885 MHz  
 SI 32768  
 SF 500.1300130 MHz  
 WDW no  
 SSB 0  
 LB 0.00 Hz  
 GB 0  
 PC 1.00

1.332

2.388  
 2.357

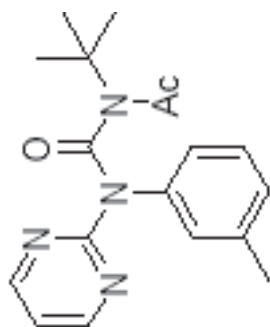

**4h**

7.322  
 7.307  
 7.291  
 7.223  
 7.214  
 7.204  
 7.155  
 7.136  
 7.119

8.737  
 8.727

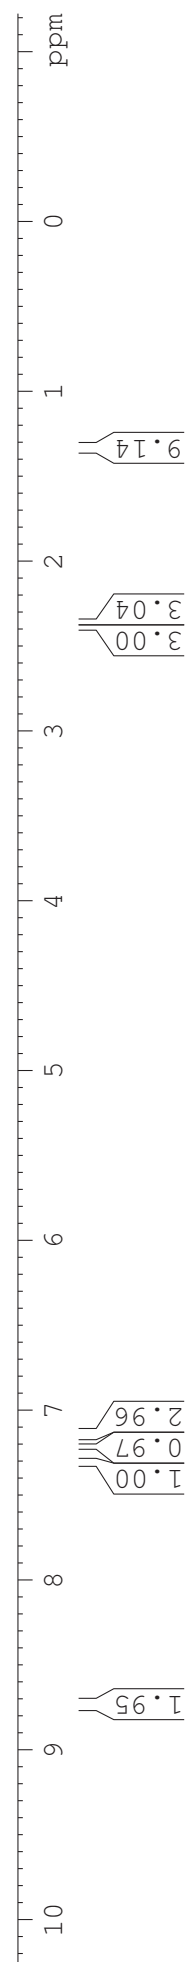

HXM-2-150  
 C13CPD CDC13

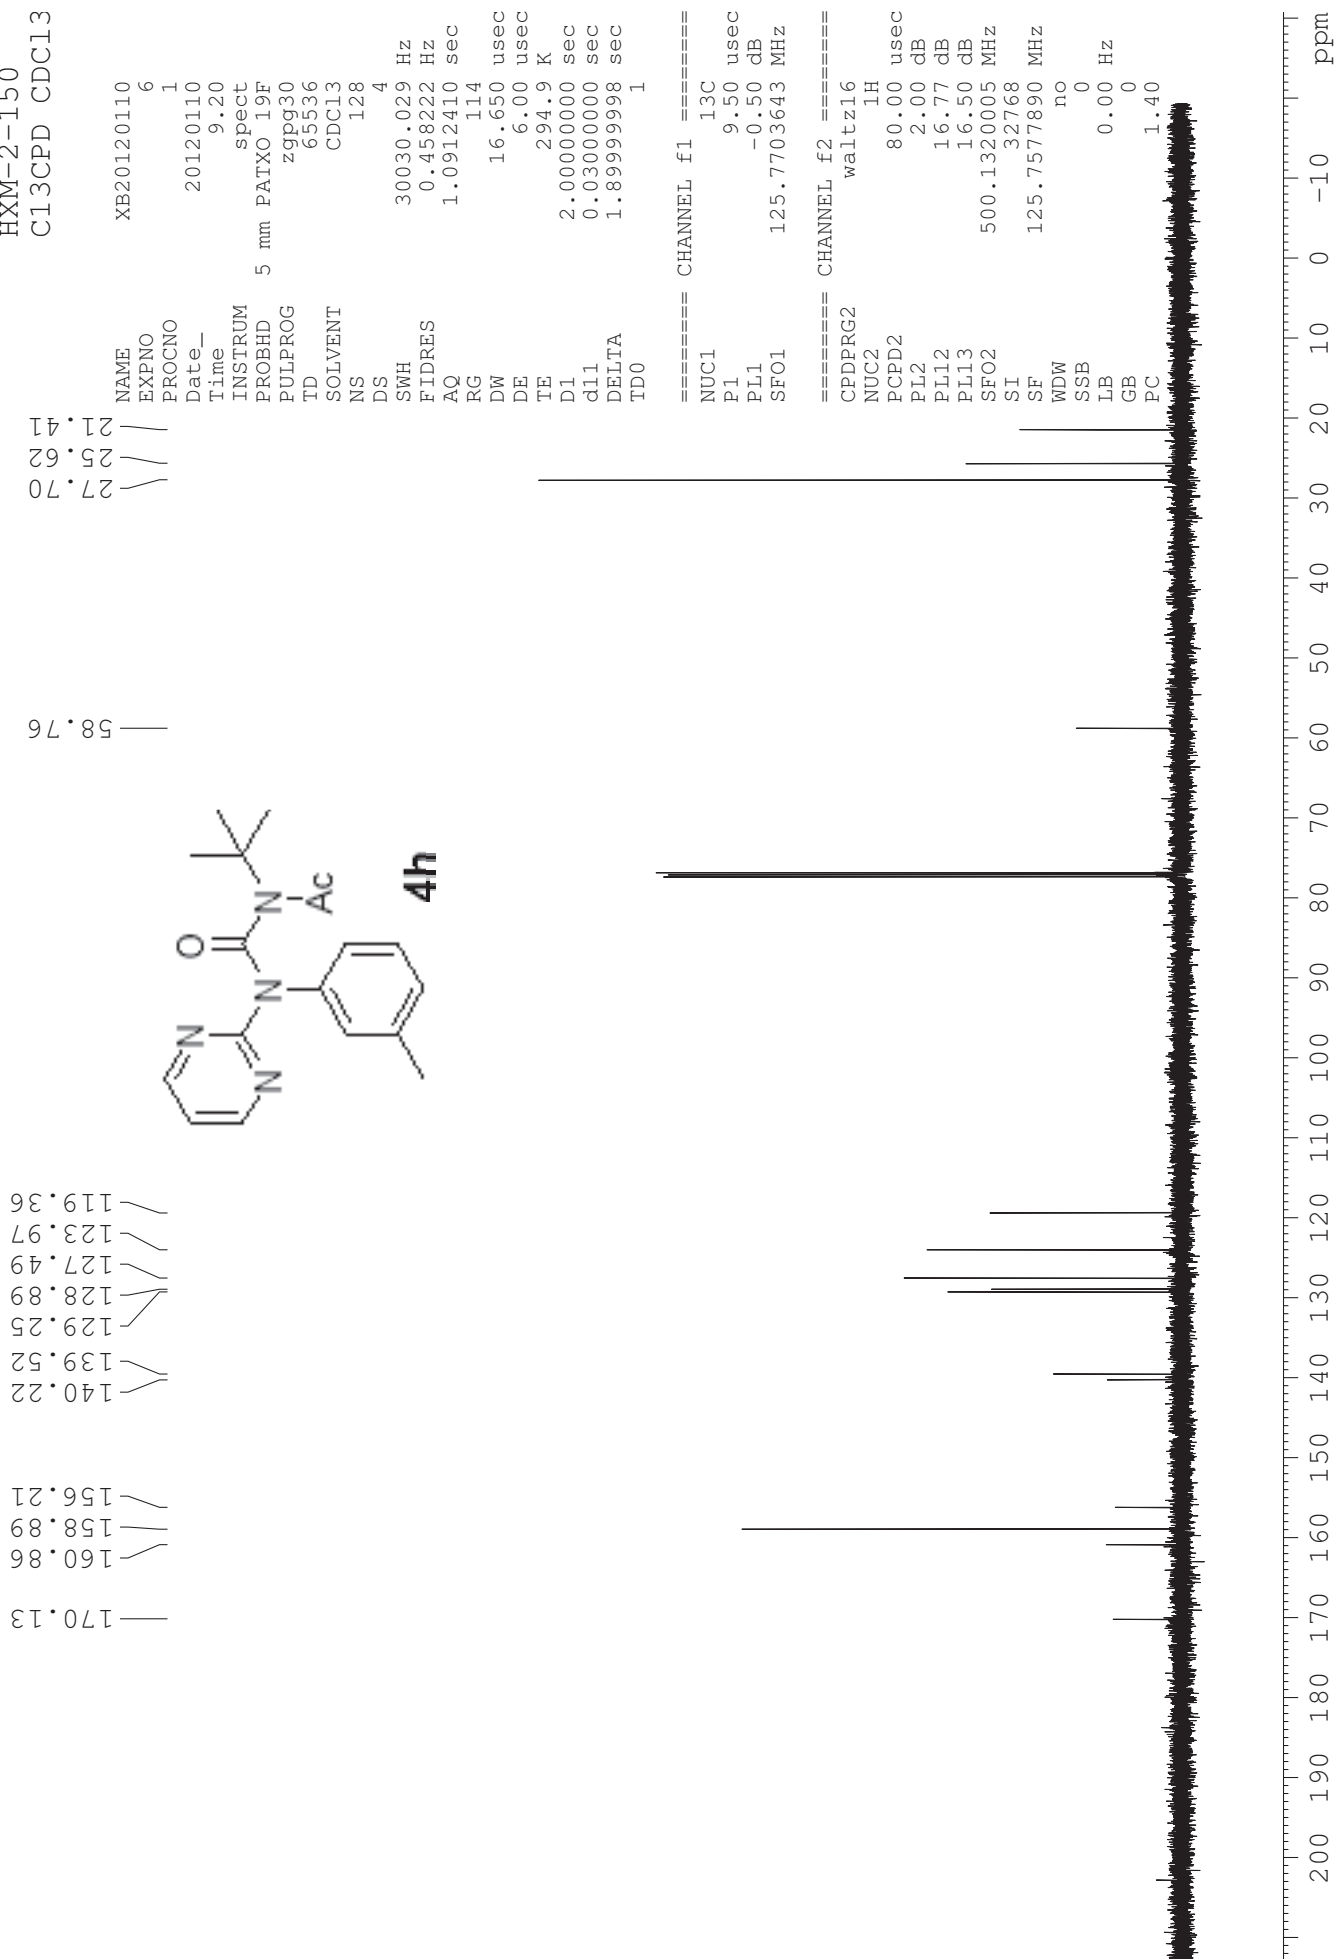

HXM-2-151  
 PROTON CDC13

NAME XB20120109  
 EXPNO 4  
 PROCNO 1  
 Date\_ 20120109  
 Time 10.29  
 INSTRUM spect  
 PROBHD 5 mm PATXO 19F  
 PULPROG zg30  
 TD 65536  
 SOLVENT CDC13  
 NS 16  
 DS 2  
 SWH 10330.578 Hz  
 FIDRES 0.157632 Hz  
 AQ 3.1720407 sec  
 RG 181  
 DW 48.400 usec  
 DE 6.00 usec  
 TE 293.5 K  
 D1 1.00000000 sec  
 TD0 1

==== CHANNEL f1 =====  
 NUC1 1H  
 P1 13.65 usec  
 PL1 1.00 dB  
 SF01 500.1330885 MHz  
 SI 32768  
 SF 500.1300128 MHz  
 WDW EM  
 SSB 0  
 LB 0.30 Hz  
 GB 0  
 PC 1.00

1.320

2.368

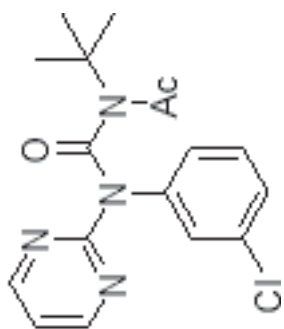

**4i**

7.376  
 7.360  
 7.344  
 7.338  
 7.323  
 7.306  
 7.260  
 7.252  
 7.242

8.748  
 8.739

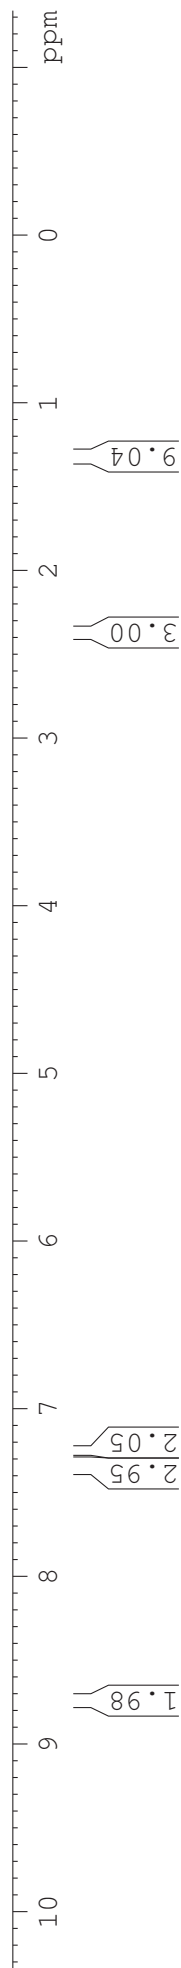

HXM-2-151  
 C13CPD CDCl3

```

NAME       XB20120109
EXPNO     11
PROCNO    1
Date_     20120109
Time      11.13
INSTRUM   spect
PROBHD    5 mm PATXO 19F
PULPROG   zgpg30
TD         65536
SOLVENT   CDCl3
NS         128
DS         4
SWH        30030.029 Hz
FIDRES     0.458222 Hz
AQ         1.0912410 sec
RG         322.5
DW         16.650 usec
DE         6.00 usec
TE         294.9 K
D1         2.00000000 sec
d11        0.03000000 sec
DELTA     1.89999998 sec
TD0        1
    
```

```

===== CHANNEL f1 =====
NUC1       13C
P1         9.50 usec
PL1        -0.50 dB
SFO1       125.7703643 MHz
    
```

```

===== CHANNEL f2 =====
CPDPRG2    waltz16
NUC2        1H
PCPD2       80.00 usec
PL2         2.00 dB
PL12        16.77 dB
PL13        16.50 dB
SFO2        500.1320005 MHz
SI          32768
SF          125.7577890 MHz
WDW         no
SSB         0
LB          0.00 Hz
GB          0
PC          1.40
    
```

27.68  
 25.59

58.94

169.97  
 160.41  
 159.01  
 156.16  
 141.28  
 134.87  
 130.33  
 128.21  
 127.33  
 125.30  
 119.68

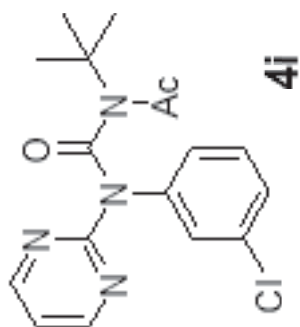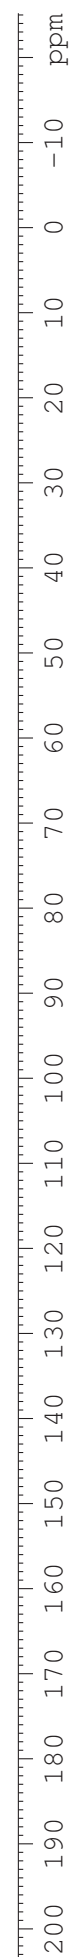

HXM-2-182  
 PROTON CDCl3

NAME XB20120227  
 EXPNO 1  
 PROCNO 1  
 Date\_ 20120227  
 Time 10.29  
 INSTRUM spect  
 PROBHD 5 mm PATXO 19F  
 PULPROG zg30  
 TD 65536  
 SOLVENT CDCl3  
 NS 16  
 DS 2  
 SWH 10330.578 Hz  
 FIDRES 0.157632 Hz  
 AQ 3.1720407 sec  
 RG 287.4  
 DW 48.400 usec  
 DE 6.00 usec  
 TE 293.5 K  
 D1 1.00000000 sec  
 TD0 1

==== CHANNEL f1 =====  
 NUC1 1H  
 P1 13.70 usec  
 PL1 1.00 dB  
 SFO1 500.1330885 MHz  
 SI 32768  
 SF 500.1300129 MHz  
 WDW no  
 SSB 0  
 LB 0.00 Hz  
 GB 0  
 PC 1.00

1.352  
 2.219  
 2.405

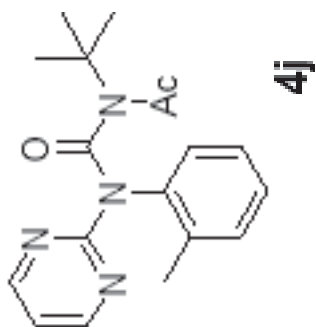

7.157  
 7.167  
 7.177  
 7.260  
 7.269  
 7.290  
 7.304  
 7.314  
 7.314  
 7.319  
 7.507

8.699  
 8.709

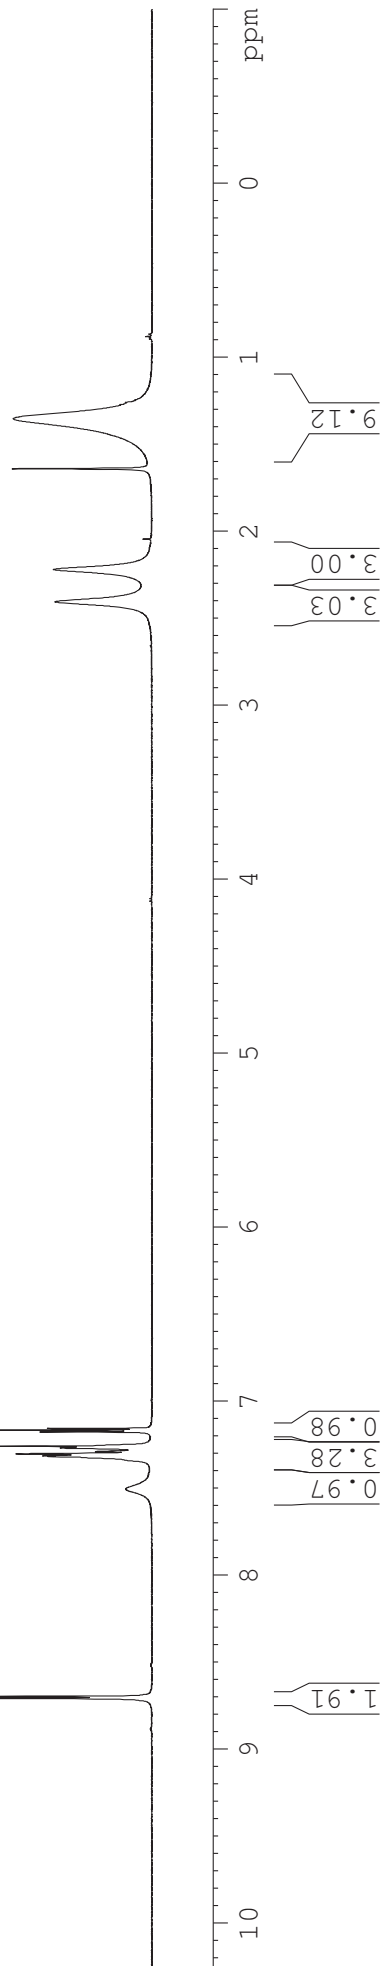

HXM-2-182  
 C13CPD CDCl3

NAME XB20120316  
 EXPNO 12  
 PROCNO 1  
 Date\_ 20120316  
 Time 18.11  
 INSTRUM spect  
 PROBHD 5 mm PATXO 19F  
 PULPROG zgpg30  
 TD 65536  
 SOLVENT CDCl3  
 NS 2048  
 DS 4  
 SWH 30030.029 Hz  
 FIDRES 0.458222 Hz  
 AQ 1.0912410 sec  
 RG 114  
 DW 16.650 usec  
 DE 6.00 usec  
 TE 295.4 K  
 D1 2.00000000 sec  
 d11 0.03000000 sec  
 DELTA 1.89999998 sec  
 TD0 1

==== CHANNEL f1 =====  
 NUC1 13C  
 P1 9.50 usec  
 PL1 -0.50 dB  
 SFO1 125.7703643 MHz

==== CHANNEL f2 =====  
 CPDPRG2 waltz16  
 NUC2 1H  
 FCPD2 80.00 usec  
 PL2 1.00 dB  
 PL12 16.33 dB  
 PL13 16.50 dB  
 SFO2 500.1320005 MHz  
 SI 32768  
 SF 125.7577890 MHz  
 WDW EM  
 SSB 0  
 LB 10.00 Hz  
 GB 0  
 PC 1.40

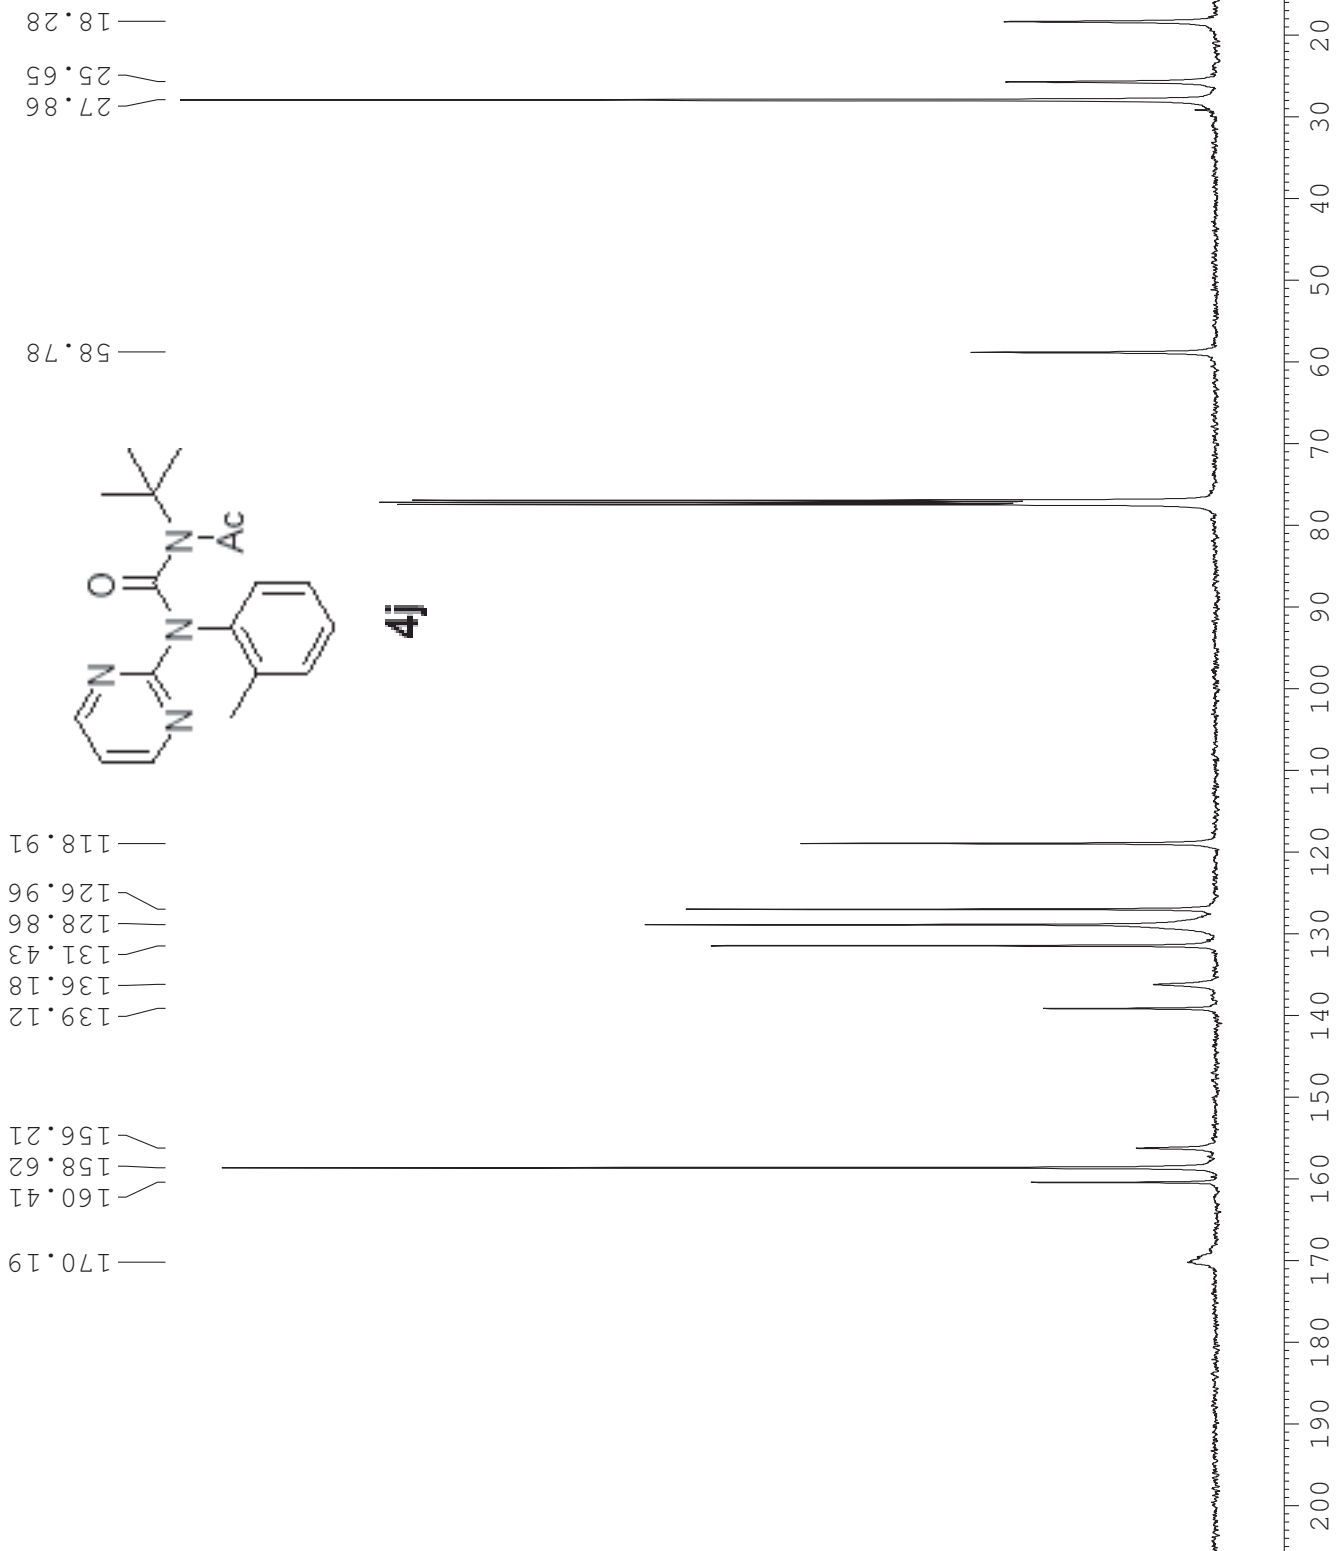

HXM-2-143  
 PROTON CDCl3

```

NAME      XB20120109
EXPNO     2
PROCNO    1
Date_     20120109
Time      10.17
INSTRUM   spect
PROBHD    5 mm PAXO 19F
PULPROG   zg30
TD         65536
SOLVENT   CDCl3
NS         16
DS         2
SWH        10330.578 Hz
FIDRES     0.157632 Hz
AQ         3.1720407 sec
RG         181
DW         48.400 usec
DE         6.00 usec
TE         293.6 K
D1         1.00000000 sec
TD0        1

===== CHANNEL f1 =====
NUC1       1H
P1         13.65 usec
PL1        1.00 dB
SFO1       500.1330885 MHz
SI         32768
SF         500.1300130 MHz
WDW        EM
SSB        0
LB         0.30 Hz
GB         0
PC         1.00
    
```

1.354

2.366

3.727

8.670  
 8.661  
 7.404  
 7.388  
 7.370  
 7.354  
 7.339  
 7.132  
 7.123  
 7.113  
 7.051  
 7.036  
 7.021  
 6.992  
 6.976

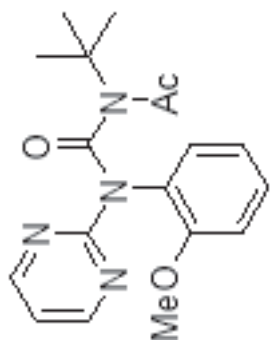

**4k**

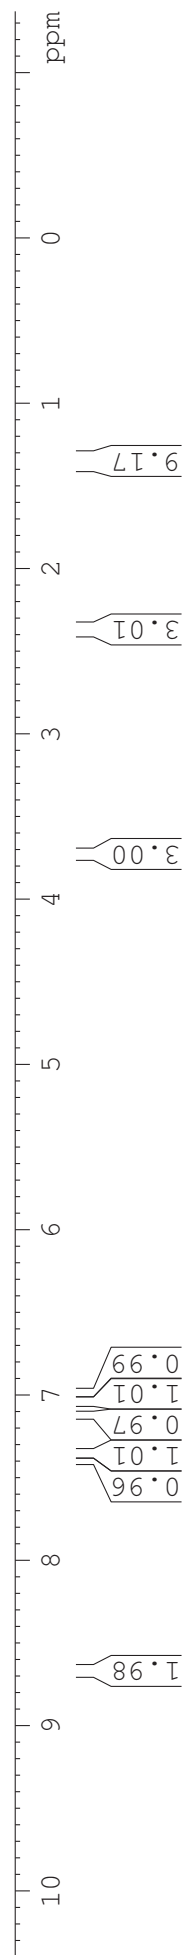



HXM-2-143  
 C13CPD CDC13

```

NAME          XB20120109
EXPNO         10
PROCNO        1
Date_         20120109
Time          11.01
INSTRUM       spect
PROBHD        5 mm PATXO 19F
PULPROG       zgpg30
TD            65536
SOLVENT       CDC13
NS            128
DS            4
SWH           30030.029 Hz
FIDRES        0.458222 Hz
AQ            1.0912410 sec
RG            181
DE            16.650 usec
TE            294.8 K
D1            2.00000000 sec
d11           0.03000000 sec
DELTA         1.89999998 sec
TD0           1
    
```

```

===== CHANNEL f1 =====
NUC1          13C
P1            9.50 usec
PL1          -0.50 dB
SFO1         125.7703643 MHz
    
```

```

===== CHANNEL f2 =====
CPDPRG2      waltz16
NUC2          1H
PCPD2        80.00 usec
PL2          2.00 dB
PL12         16.77 dB
PL13         16.50 dB
SFO2         500.1320005 MHz
SI           32768
SF           125.7577890 MHz
WDW          no
SSB          0
LB           0.00 Hz
GB           0
PC           1.40
    
```

27.81  
 25.54

58.59  
 55.76

129.77  
 129.29  
 129.15  
 121.02  
 118.48  
 112.59

170.23  
 160.69  
 158.32  
 155.86  
 155.08

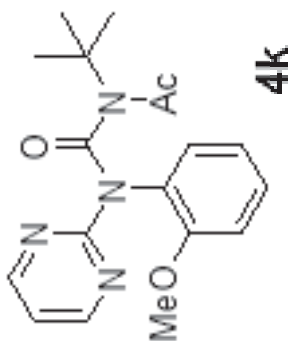

4k

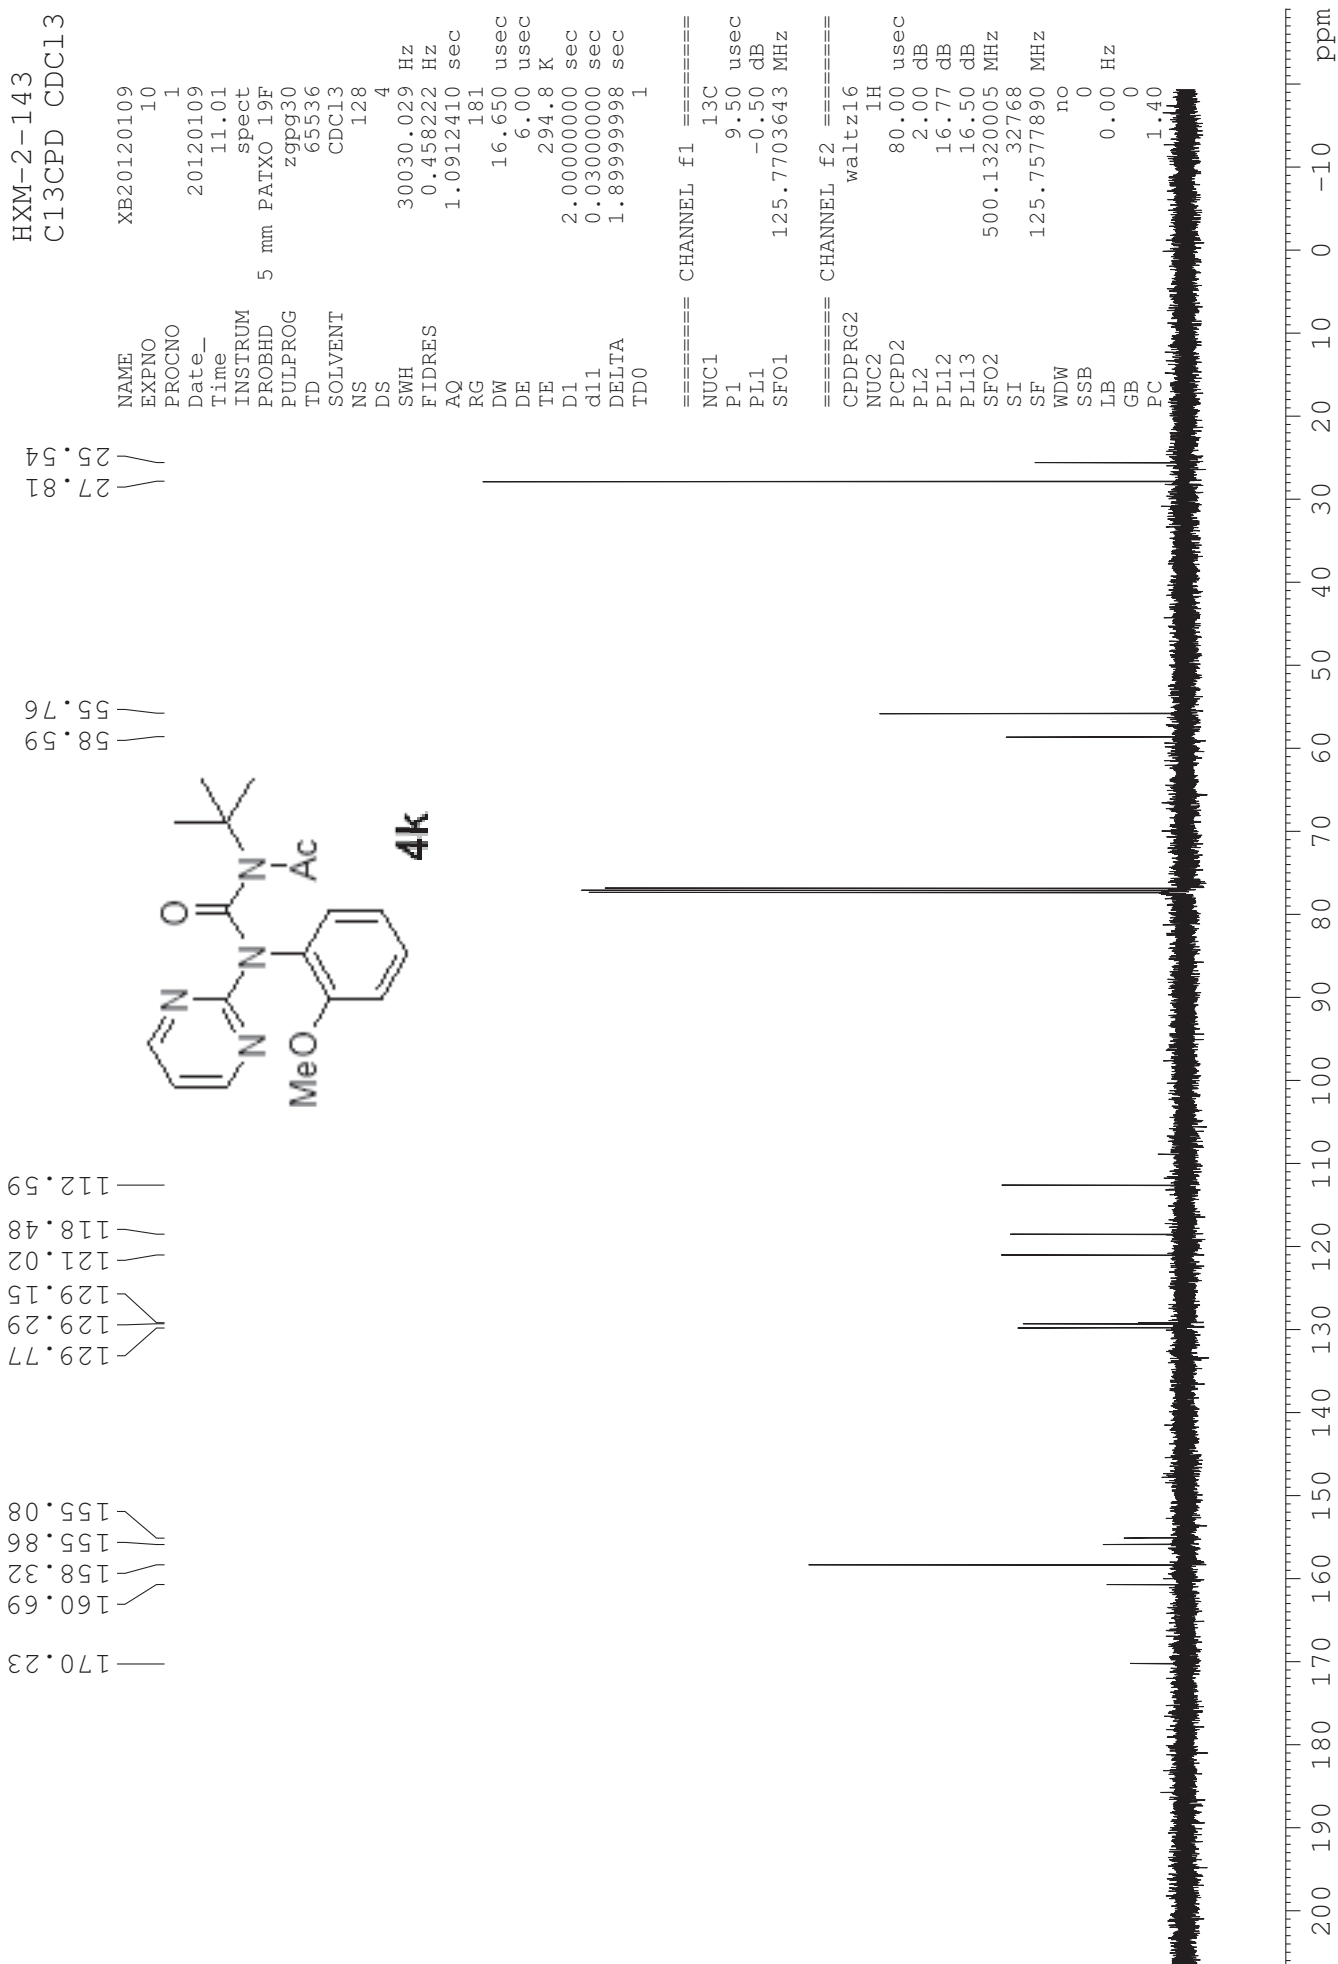

HXM-2-195  
 PROTON CDC13 I

Current Data Parameters  
 NAME XB20120229  
 EXENO 6  
 PROCNO 1

F2 - Acquisition Parameters  
 Date\_ 20120229  
 Time\_ 14.40  
 INSTRUM spect  
 PROBD 5 mm PATXO 19F  
 PULPROG zg30  
 TD 65536  
 SOLVENT CDCl3  
 NS 16  
 DS 2  
 SMH 10330.578 Hz  
 FIDRES 0.157632 Hz  
 AQ 3.1720407 sec  
 RG 322.5  
 DW 48.400 usec  
 DE 6.00 usec  
 TE 293.6 K  
 D1 1.00000000 sec  
 TD0 1

==== CHANNEL f1 =====  
 NUC1 1H  
 P1 13.70 usec  
 PL1 1.00 dB  
 SF01 500.1330885 MHz  
 F2 - Processing parameters  
 SI 32768  
 SF 500.1300129 MHz  
 MDW no  
 SSB 0  
 LB 0.00 Hz  
 GB 0  
 PC 1.00

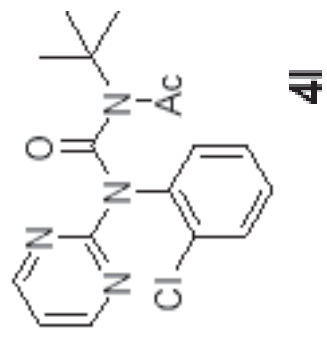

8.688  
 8.678  
 7.613  
 7.597  
 7.473  
 7.472  
 7.456  
 7.443  
 7.441  
 7.428  
 7.412  
 7.378  
 7.375  
 7.362  
 7.359  
 7.347  
 7.344  
 7.166  
 7.156  
 7.146

2.392  
 1.369

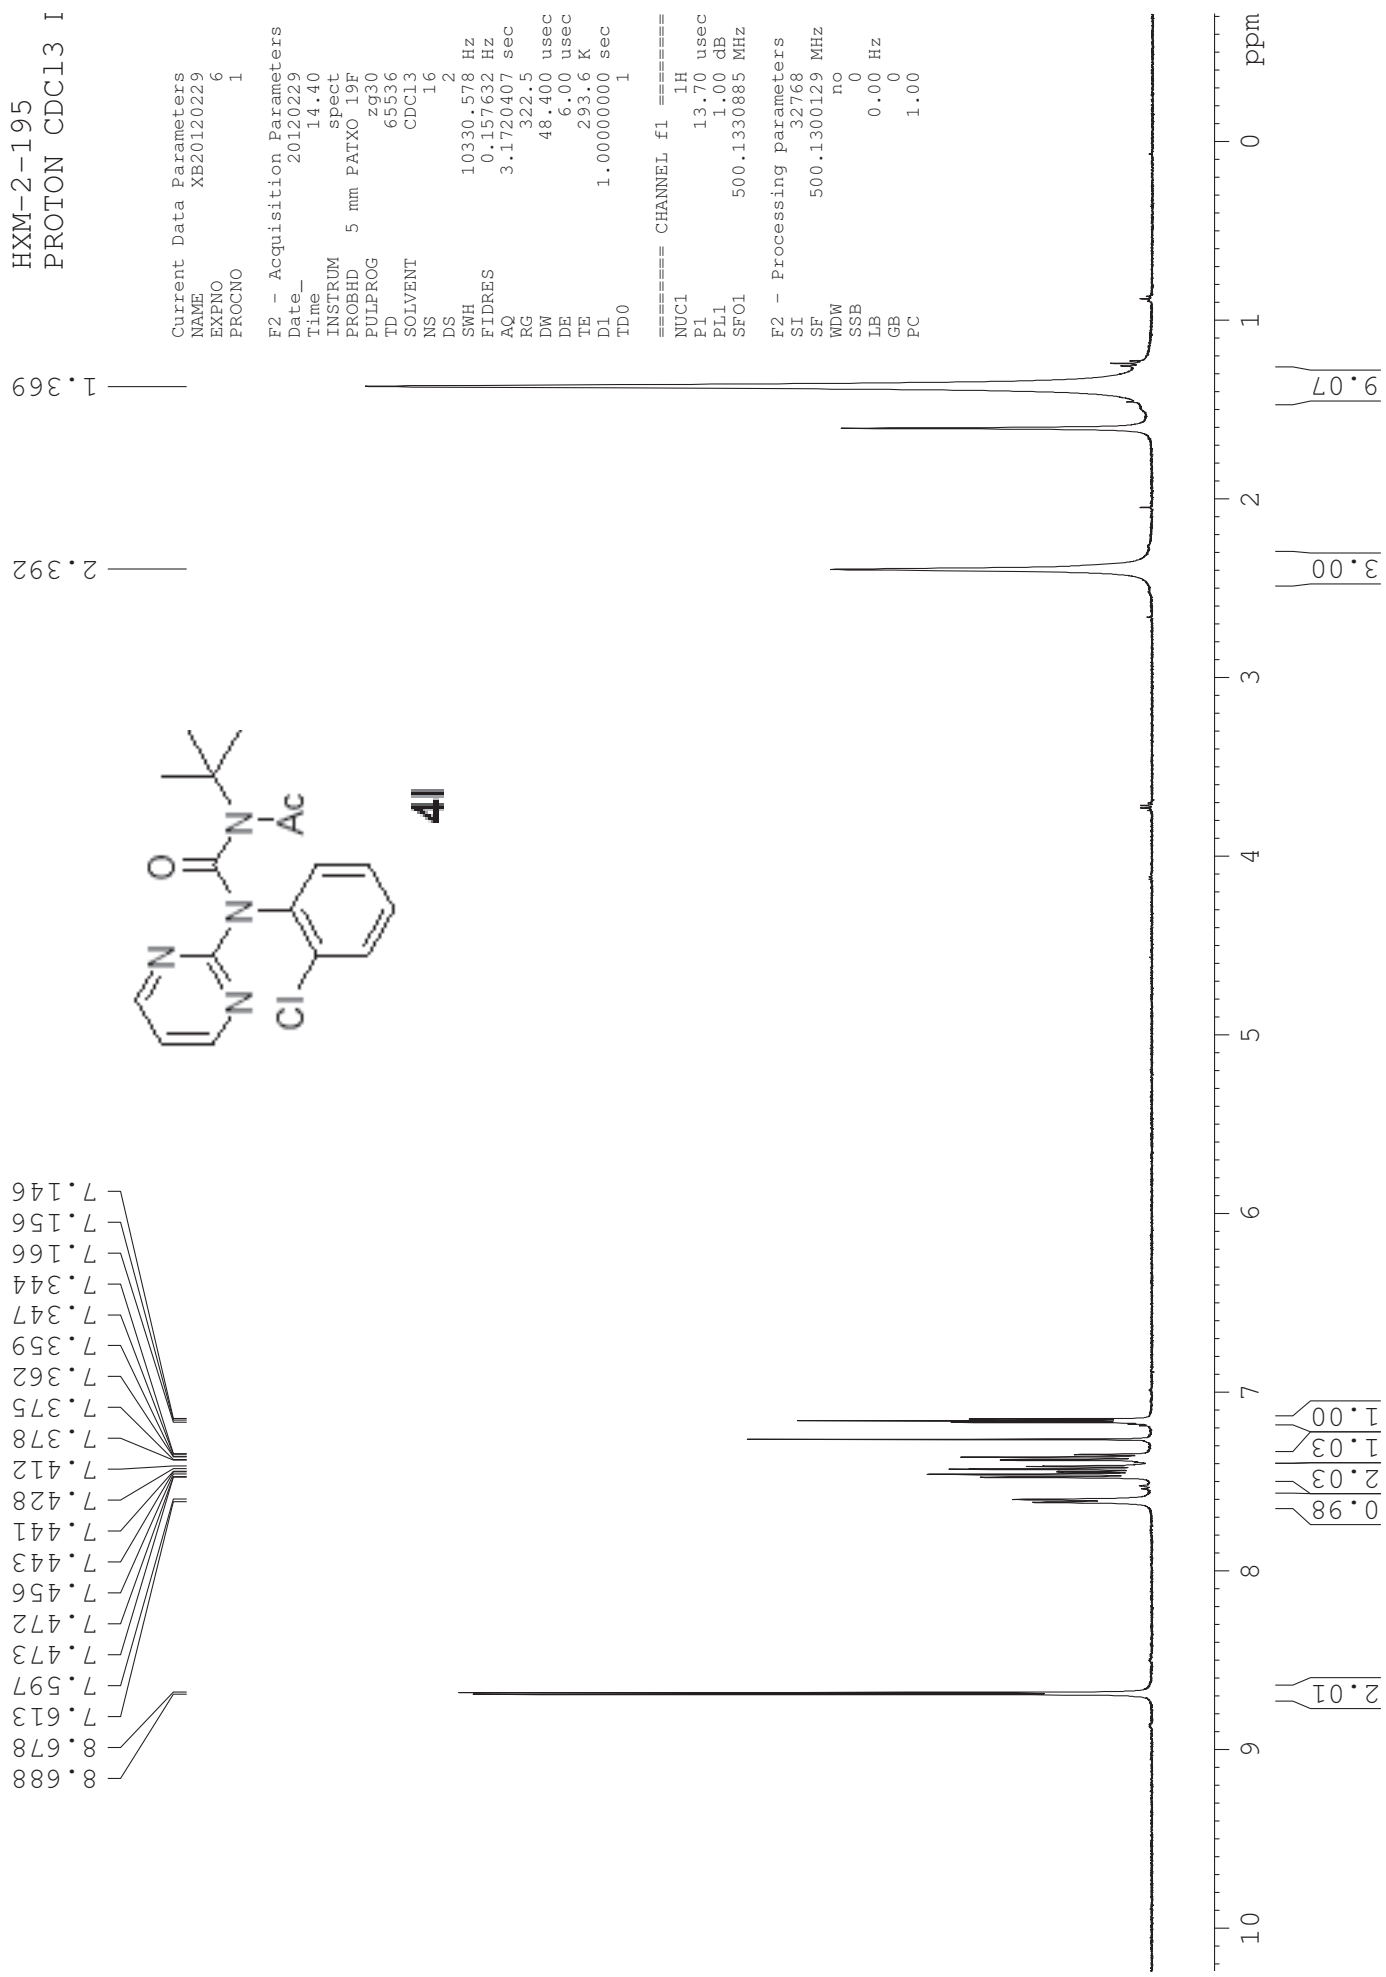

HXM-2-195  
C13CPD CDC13

Current Data Parameters  
NAME XB20120405  
EXPNO 4  
PROCNO 1

F2 - Acquisition Parameters  
Date\_ 20120405  
Time 14.27  
INSTRUM spect  
PROBHD 5 mm PATXO 19F  
PULPROG zgpg30  
TD 65536  
SOLVENT CDC13  
NS 128  
DS 4  
SWH 30030.029 Hz  
FIDRES 0.458222 Hz  
AQ 1.0912410 sec  
RG 203.2  
DW 16.650 usec  
DE 6.00 usec  
TE 295.7 K  
D1 2.00000000 sec  
d11 0.03000000 sec  
DELTA 1.89999998 sec  
TD0 1

==== CHANNEL f1 =====  
NUC1 13C  
P1 9.50 usec  
PL1 -0.50 dB  
SFO1 125.7703643 MHz

==== CHANNEL f2 =====  
CPDPRG2 waltz16  
NUC2 1H  
PCPD2 80.00 usec  
PL2 1.00 dB  
PL12 16.33 dB  
PL13 16.50 dB  
SFO2 500.1320005 MHz

F2 - Processing parameters  
SI 32768  
SF 125.7577890 MHz  
WDW no  
SSB 0  
LB 0.00 Hz  
GB 0  
PC 1.40

27.88  
25.71

58.85

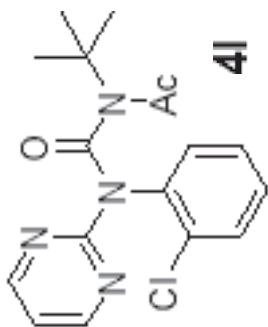

137.82  
132.54  
130.94  
130.58  
129.83  
127.75  
118.67

159.78  
158.45  
158.38  
156.25

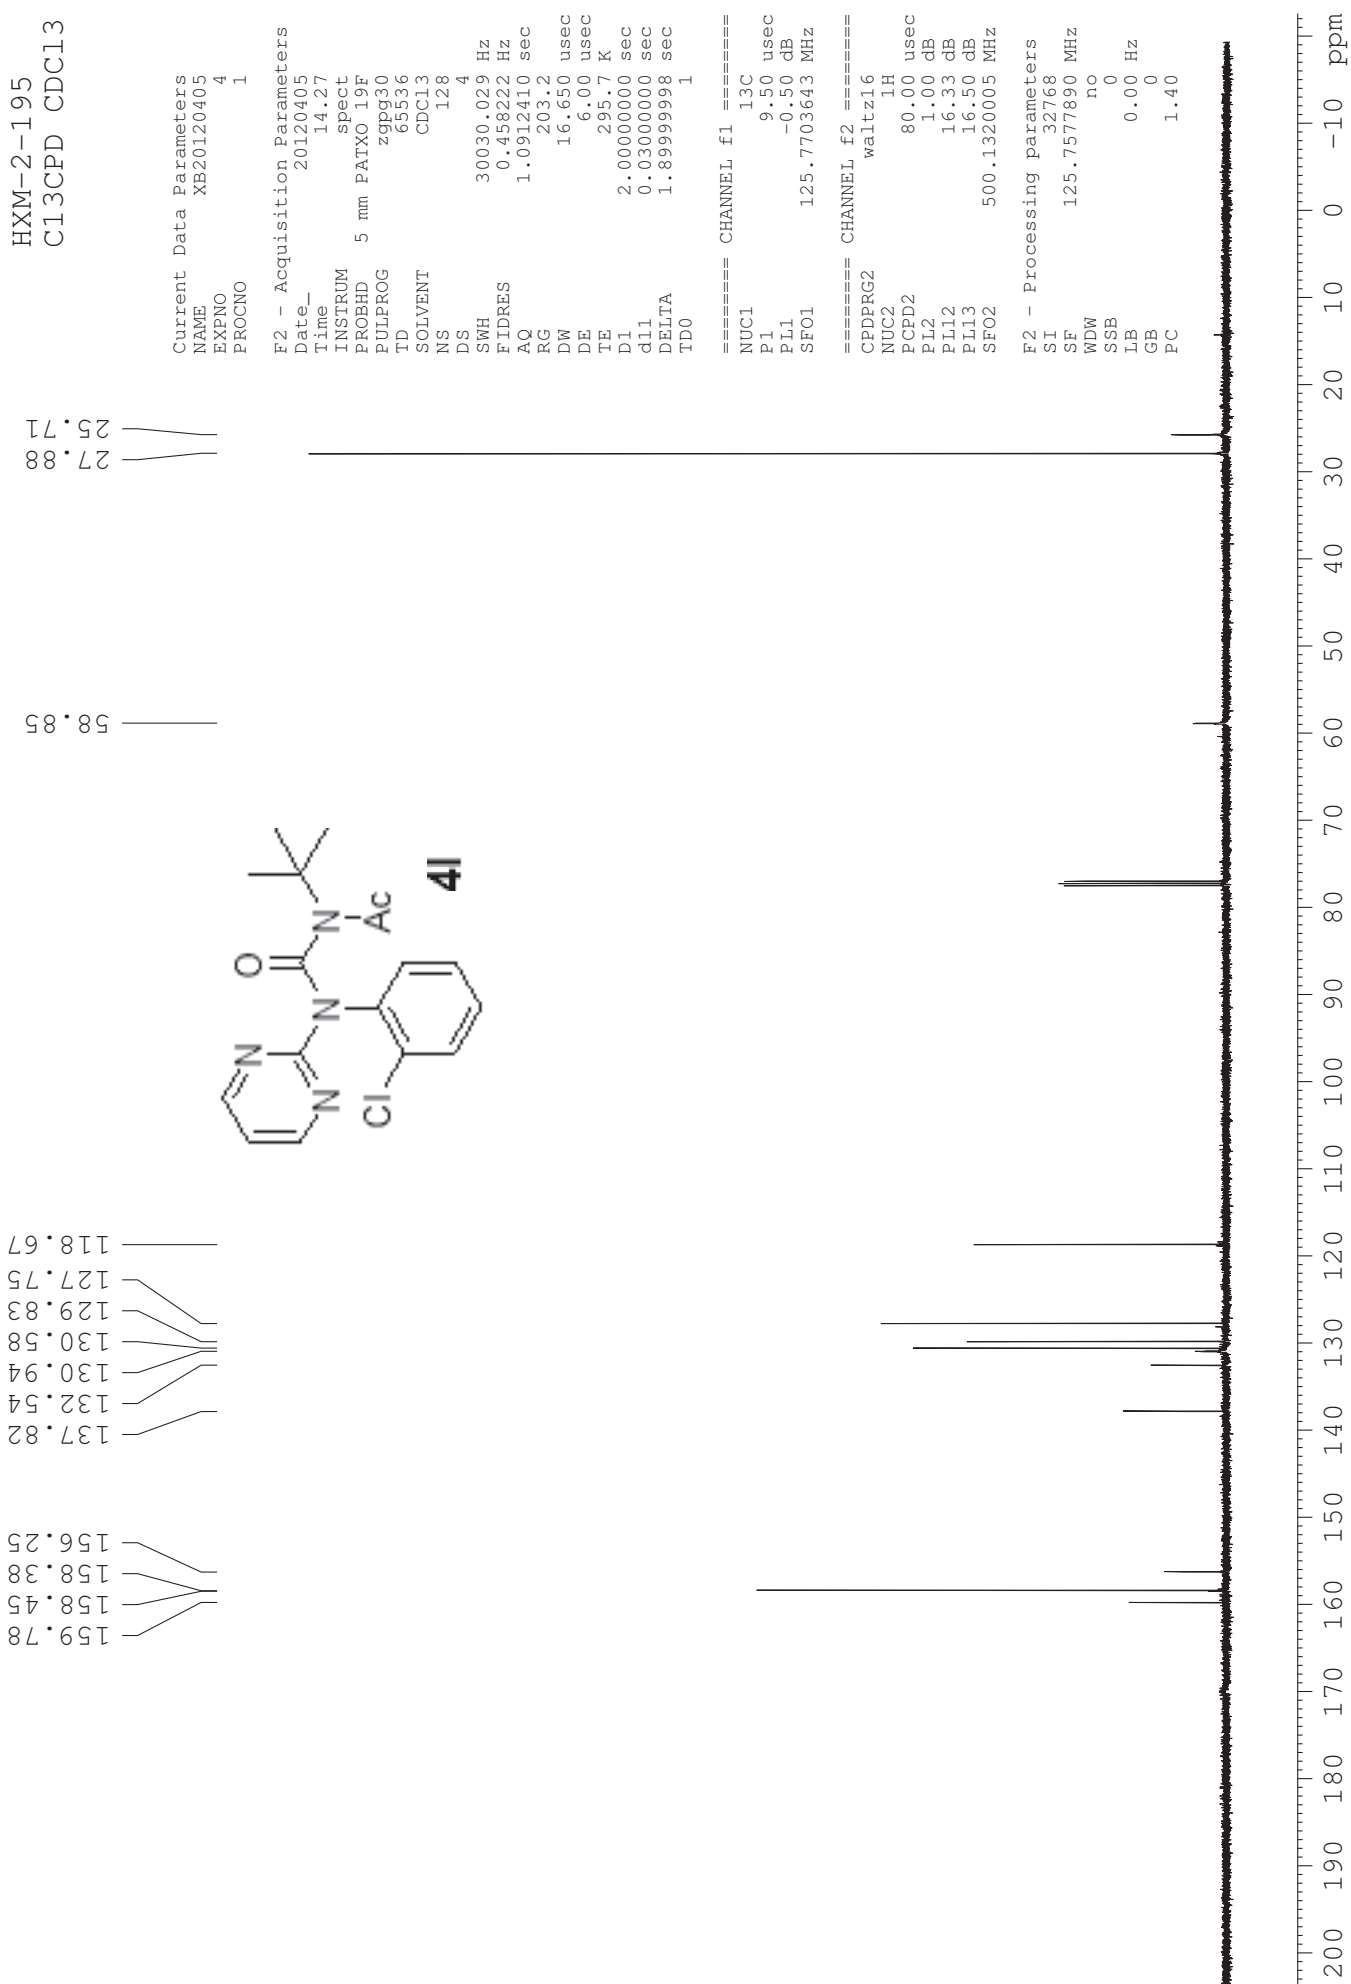

HXM-2-152  
PROTON CDCl3

Current Data Parameters  
NAME XB20120112  
EXPNO 2  
PROCNO 1

F2 - Acquisition Parameters  
Date\_ 20120112  
Time 13.30  
INSTRUM spect  
PROBHD 5 mm PAXYO 19F  
PULPROG zg30  
TD 65536  
SOLVENT CDCl3  
NS 8  
DS 2  
SWH 10330.578 Hz  
FIDRES 0.157632 Hz  
AQ 3.1720407 sec  
RG 256  
DW 48.400 usec  
DE 6.00 usec  
TE 293.5 K  
D1 1.0000000 sec  
TD0 1

==== CHANNEL f1 =====  
NUC1 1H  
P1 13.65 usec  
PL1 1.00 dB  
SFO1 500.1330885 MHz

F2 - Processing parameters  
SI 32768  
SF 500.1300127 MHz  
WDW no  
SSB 0  
LB 0.00 Hz  
GB 0  
FC 1.00

7.163  
7.179  
7.196  
7.250  
7.260  
7.270  
7.299  
7.304  
7.307  
7.312  
7.316  
7.322  
7.325  
7.330  
7.552  
7.557  
7.564  
7.569  
8.740  
8.749

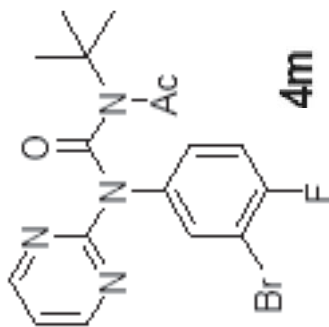

1.314  
2.361

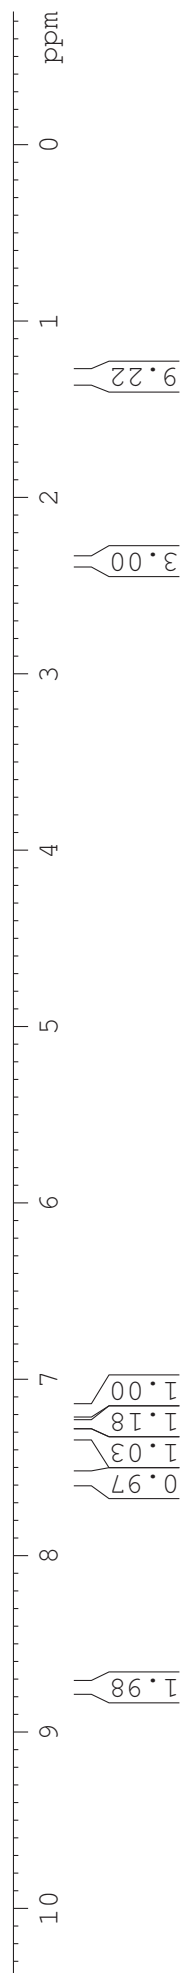

HXM-2-152  
19Fdeft CDCl3 D:\deng 3C

-107.157  
-107.170  
-107.183  
-107.196

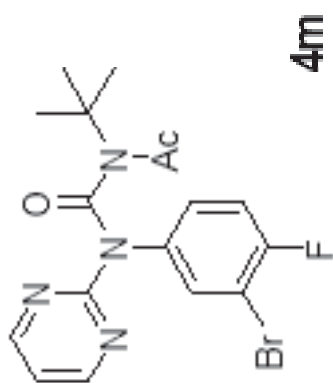

**4m**

0 -20 -40 -60 -80 -100 -120 -140 -160 -180 ppm

HXM-2-152  
 C13CPD CDC13

Current Data Parameters  
 NAME XB20120112  
 EXENO 4  
 PROCNO 1

F2 - Acquisition Parameters  
 Date\_ 20120112  
 Time\_ 13.41  
 INSTRUM spect  
 PROBHD 5 mm PAXO 19F  
 PULPROG zgpg30  
 TD 65536  
 SOLVENT CDC13  
 NS 128  
 DS 4  
 SWH 30030.029 Hz  
 FIDRES 0.458222 Hz  
 AQ 1.0912410 sec  
 RG 114  
 DW 16.650 usec  
 DE 6.00 usec  
 TE 294.7 K  
 D1 2.00000000 sec  
 d11 0.03000000 sec  
 DELTA 1.89999998 sec  
 TD0 1

==== CHANNEL f1 =====  
 NUC1 13C  
 P1 9.50 usec  
 PL1 -0.50 dB  
 SF01 125.7703643 MHz

==== CHANNEL f2 =====  
 CPDPRG2 waltz16  
 NUC2 1H  
 PCPD2 80.00 usec  
 PL2 2.00 dB  
 PL12 16.77 dB  
 PL13 16.50 dB  
 SF02 500.1320005 MHz

F2 - Processing parameters  
 SI 32768  
 SF 125.7577890 MHz  
 WDW no  
 SSB 0  
 LB 0.00 Hz  
 GB 0  
 FC 1.40

25.56  
 27.68

58.93

109.67  
 116.91  
 117.09  
 119.72  
 128.03  
 128.09  
 132.41  
 136.82  
 136.85

156.33  
 159.03  
 159.43  
 160.27  
 169.85

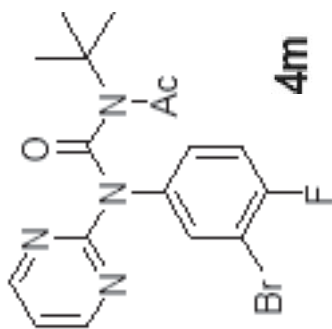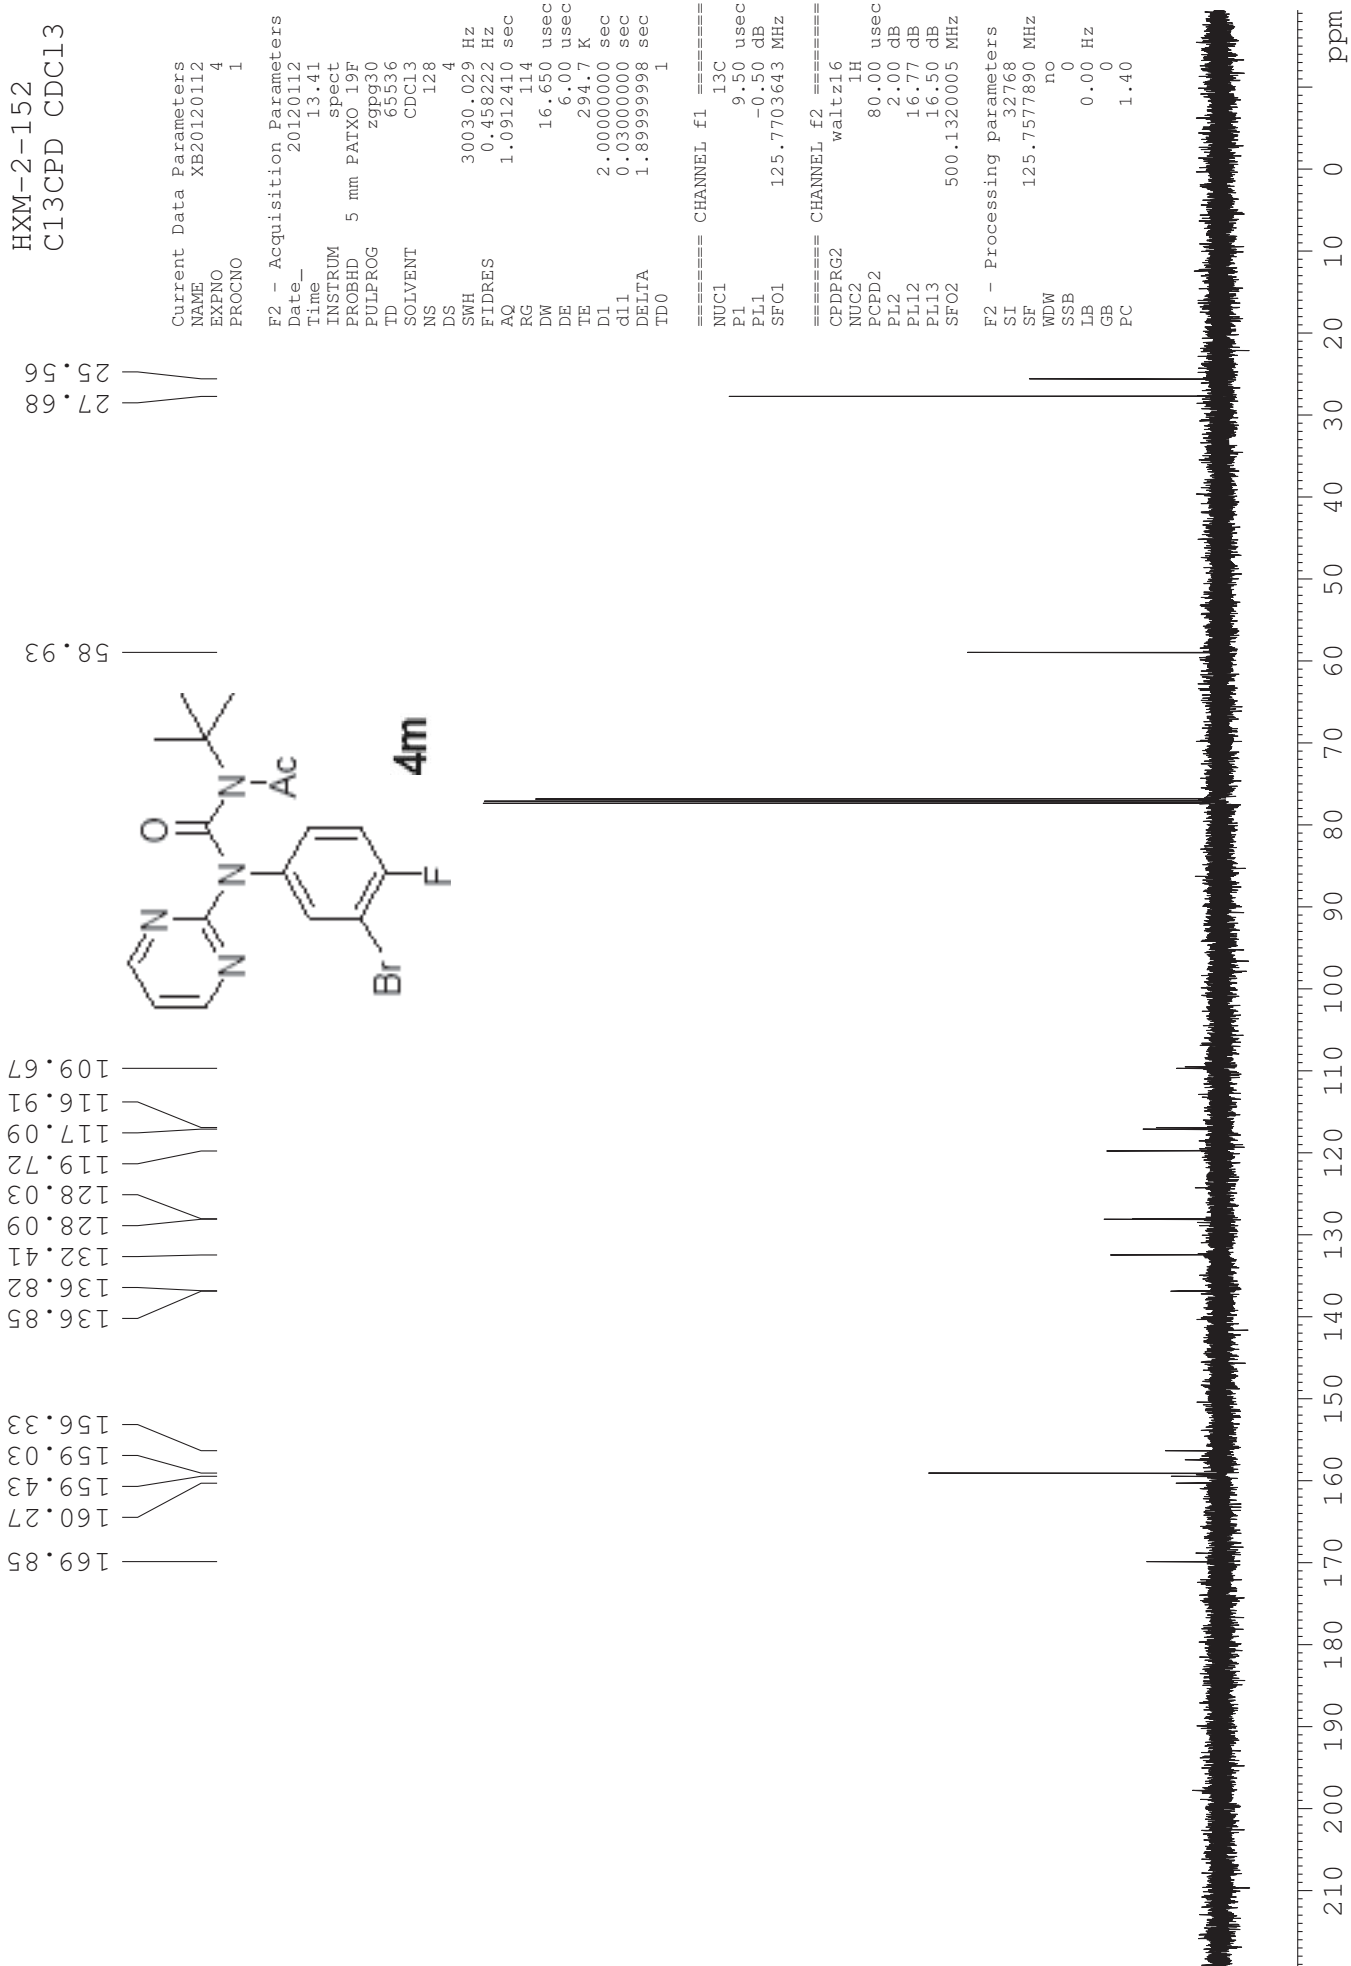

HXM-2-364  
 PROTON CDCl<sub>3</sub>:

```

NAME      xb2012120629
EXPNO     1
PROCNO    1
Date_     20120629
Time      10.23
INSTRUM   spect
PROBHD    5 mm PATXO 19F
PULPROG   zg30
TD         65536
SOLVENT   CDCl3
NS         8
DS         2
SWH        10330.578 Hz
FIDRES     0.157632 Hz
AQ         3.1720407 sec
RG         161.3
DE         48.400 usec
TE         295.8 K
D1         1.00000000 sec
TD0        1

===== CHANNEL f1 =====
NUC1       1H
P1         13.72 usec
PL1        1.00 dB
SFO1       500.1330885 MHz
SI         32768
SF         500.1300129 MHz
WDW        EM
SSB        0
LB         0.30 Hz
GB         0
PC         1.00
    
```

1.388

2.455

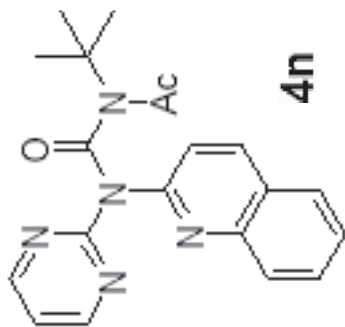

7.250  
 7.260  
 7.269  
 7.503  
 7.505  
 7.517  
 7.520  
 7.533  
 7.535  
 7.622  
 7.625  
 7.636  
 7.639  
 7.642  
 7.653  
 7.656  
 7.689  
 7.707  
 7.815  
 7.831  
 7.831  
 8.247  
 8.264  
 8.264  
 8.759  
 8.759  
 8.769

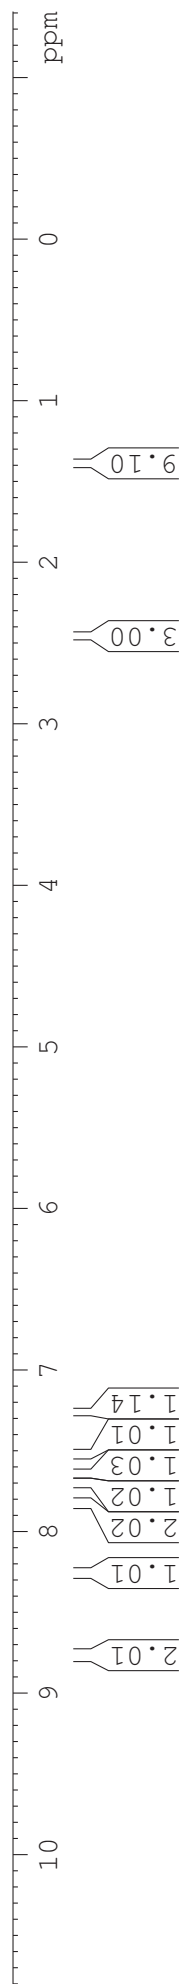

HXM-2-364  
 C13CPD CDCl3

170.23  
 160.67  
 158.84  
 156.52  
 152.85  
 146.96  
 138.39  
 129.96  
 129.02  
 127.43  
 126.98  
 126.93  
 119.44  
 118.57

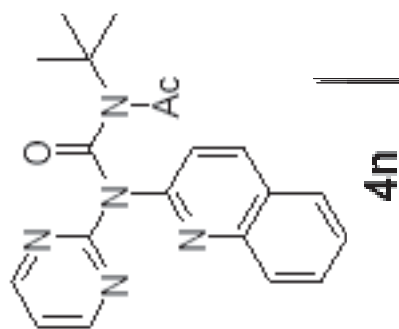

27.85  
 25.85

59.38

NAME xb20120629  
 EXPNO 3  
 PROCNO 1  
 Date\_ 20120629  
 Time 10.34  
 INSTRUM spect  
 PROBHD 5 mm PATXO 19F  
 PULPROG zgpg30  
 TD 65536  
 SOLVENT CDCl3  
 NS 128  
 DS 4  
 SWH 30030.029 Hz  
 FIDRES 0.458222 Hz  
 AQ 1.0912410 sec  
 RG 143.7  
 DW 16.650 usec  
 DE 6.00 usec  
 TE 297.1 K  
 D1 2.00000000 sec  
 d11 0.03000000 sec  
 DELTA 1.89999998 sec  
 TD0 1

==== CHANNEL f1 =====  
 NUC1 13C  
 P1 9.50 usec  
 PL1 -0.50 dB  
 SFO1 125.7703643 MHz  
 ===== CHANNEL f2 =====  
 CPDPRG2 waltz16  
 NUC2 1H  
 PCPD2 80.00 usec  
 PL2 1.00 dB  
 PL12 16.31 dB  
 PL13 16.50 dB  
 SFO2 500.1320005 MHz  
 SI 32768  
 SF 125.7577890 MHz  
 WDW EM  
 SSB 0  
 LB 2.00 Hz  
 GB 0  
 PC 1.40

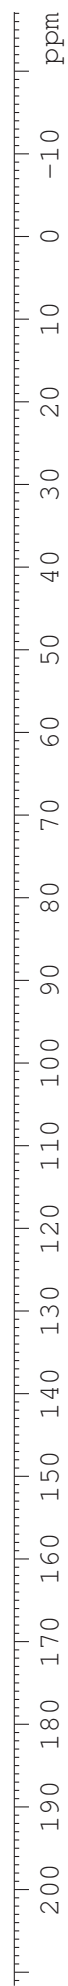





HXM-2-254  
C13CPD CDC13

NAME XB20120411  
EXPNO 5  
PROCNO 1  
Date\_ 20120411  
Time 10.34  
INSTRUM spect  
PROBHD 5 mm PATXO 19F  
PULPROG zgpg30  
TD 65536  
SOLVENT CDC13  
NS 128  
DS 4  
SWH 30030.029 Hz  
FIDRES 0.458222 Hz  
AQ 1.0912410 sec  
RG 161.3  
DW 16.650 usec  
DE 6.00 usec  
TE 296.9 K  
D1 2.00000000 sec  
d11 0.03000000 sec  
DELTA 1.89999998 sec  
TD0 1

==== CHANNEL f1 =====  
NUC1 13C  
P1 9.50 usec  
PL1 -0.50 dB  
SF01 125.7703643 MHz

==== CHANNEL f2 =====  
CPDPRG2 waltz16  
NUC2 1H  
PCPD2 80.00 usec  
PL2 1.00 dB  
PL12 16.31 dB  
PL13 16.50 dB  
SFO2 500.1320005 MHz  
SI 32768  
SF 125.7577890 MHz  
WDW no  
SSB 0  
LB 0.00 Hz  
GB 0  
PC 1.40

30.06  
26.25  
25.40  
24.74

58.33

170.87  
161.35  
158.59  
157.05

140.80

129.54  
127.75  
127.09  
118.19

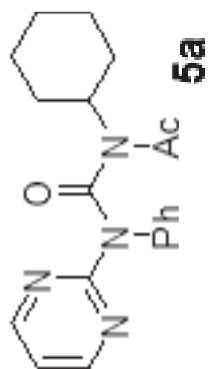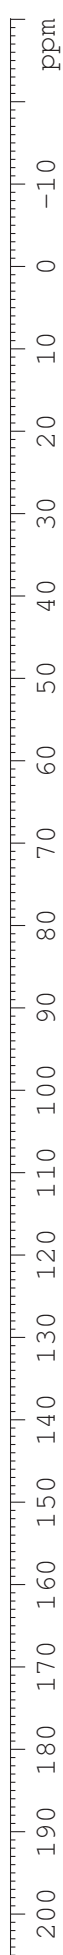

hxm-2-241-1  
PROTON CDCl3

NAME xlb20120331  
EXPNO 5  
PROCNO 1  
Date\_ 20120331  
Time 13.16  
INSTRUM spect  
PROBHD 5 mm PATXO 19F  
PULPROG zg30  
TD 65536  
SOLVENT CDCl3  
NS 8  
DS 2  
SWH 10330.578 Hz  
FIDRES 0.157632 Hz  
AQ 3.1720407 sec  
RG 90.5  
DW 48.400 usec  
DE 6.00 usec  
TE 294.6 K  
D1 1.00000000 sec  
TD0 1

==== CHANNEL f1 =====  
NUC1 1H  
P1 13.70 usec  
PL1 1.00 dB  
SFO1 500.1330885 MHz  
SI 32768  
SF 500.1300129 MHz  
WDW no  
SSB 0  
LB 0.00 Hz  
GB 0  
PC 1.00

1.896  
2.453

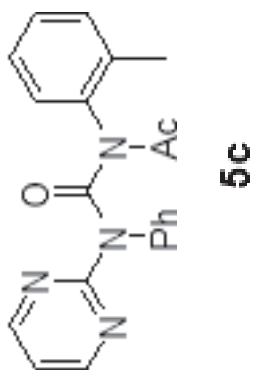

8.541  
8.550  
7.290  
7.280  
7.150  
7.137  
7.122  
7.070  
7.056  
7.043  
7.002  
6.992  
6.983  
6.894  
6.885

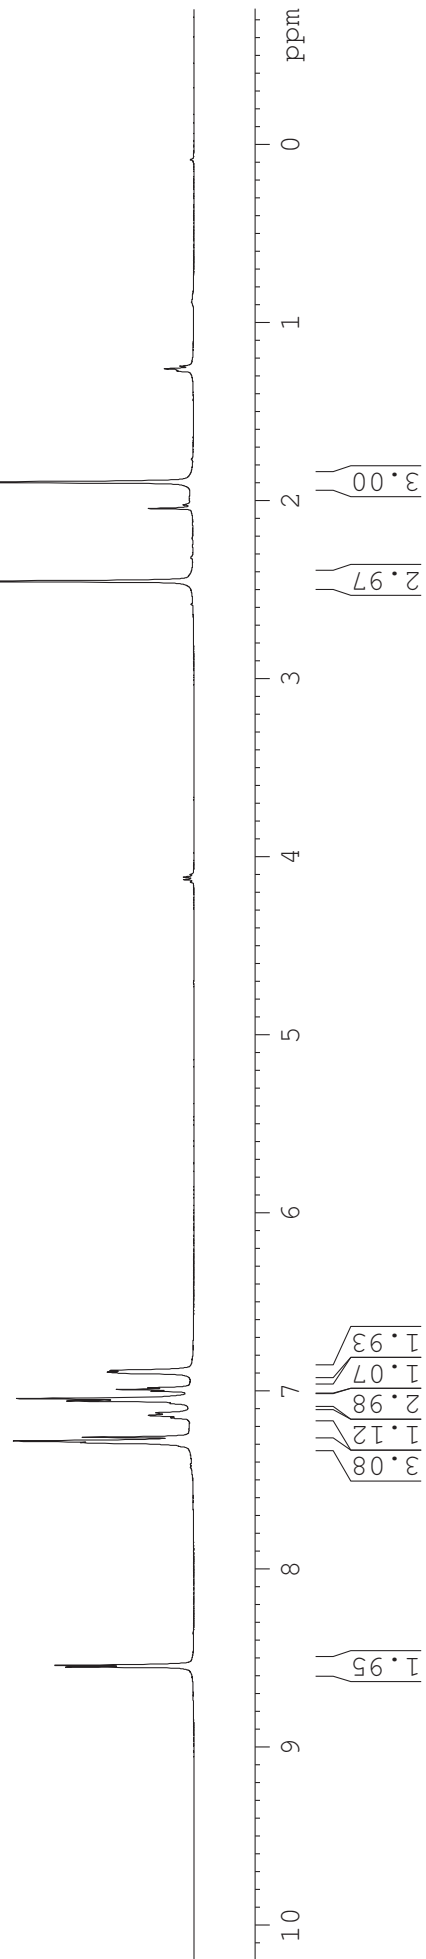

hxm-2-241-1  
 C13CPD CDCl3

```

NAME          xb20120331
EXPNO         7
PROCNO        1
Date_         20120331
Time          13.25
INSTRUM       spect
PROBHD        5 mm PATXO 19F
PULPROG       zgpg30
TD            65536
SOLVENT       CDCl3
NS            128
DS            4
SWH           30030.029 Hz
FIDRES        0.458222 Hz
AQ            1.0912410 sec
RG            114
DW            16.650 usec
DE            6.00 usec
TE            296.1 K
D1            2.00000000 sec
d11           0.03000000 sec
DELTA         1.89999998 sec
TD0           1
    
```

```

===== CHANNEL f1 =====
NUC1          13C
P1            9.50 usec
PL1          -0.50 dB
SFO1         125.7703643 MHz
    
```

```

===== CHANNEL f2 =====
CPDPRG2      waltz16
NUC2          1H
PCPD2        80.00 usec
PL2          1.00 dB
PL12         16.33 dB
PL13         16.50 dB
SFO2         500.1320005 MHz
SI           32768
SF           125.7577890 MHz
WDW          no
SSB          0
LB           0.00 Hz
GB           0
PC           1.40
    
```

17.90  
 25.01

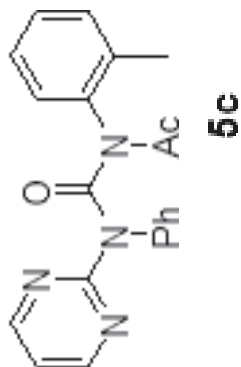

172.87  
 161.42  
 158.26  
 157.09  
 139.85  
 137.00  
 136.69  
 130.77  
 129.33  
 128.33  
 128.13  
 127.73  
 127.55  
 126.44  
 117.09

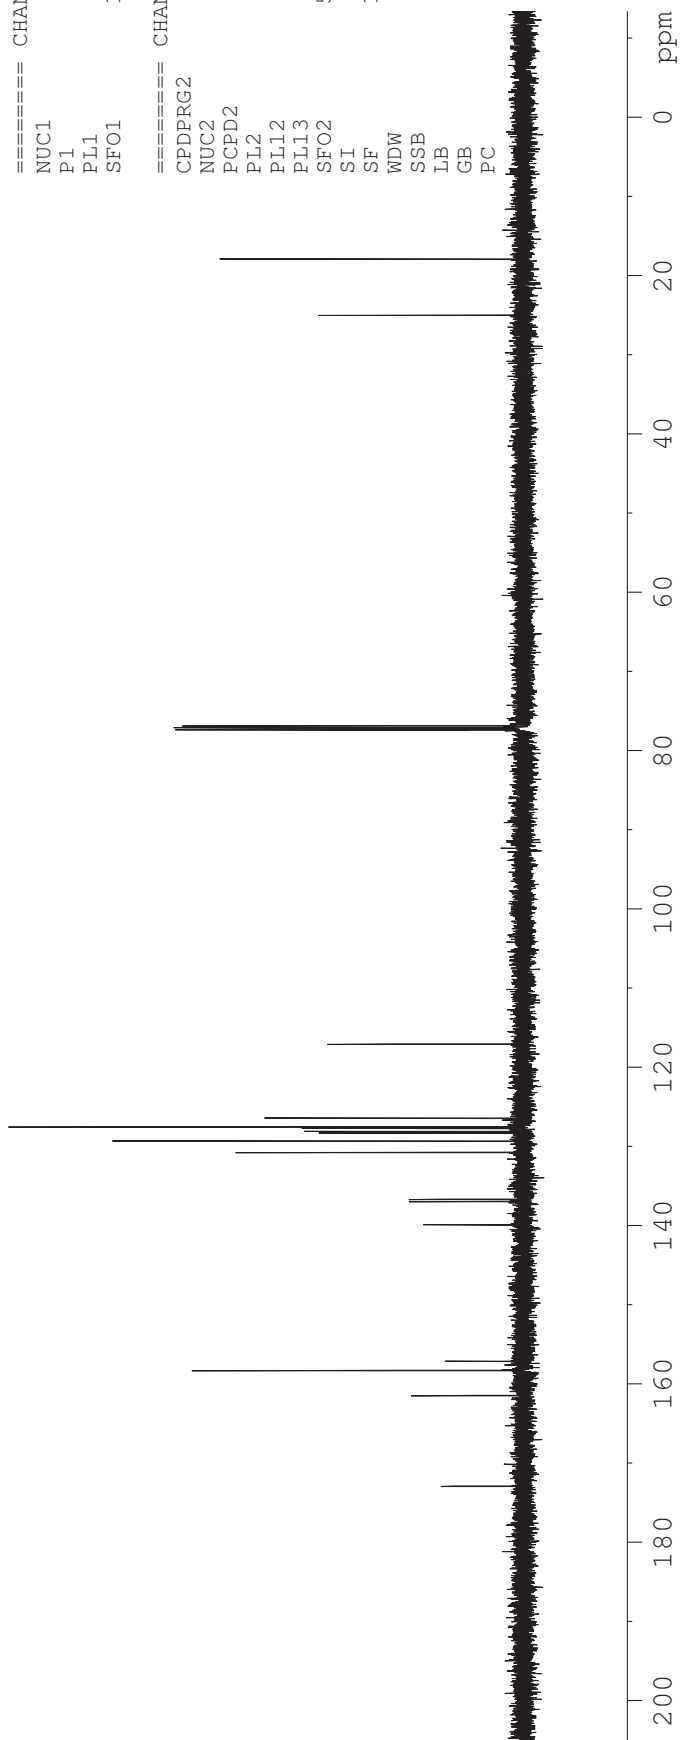

HXM-2-216  
PROTON CDCl3

NAME XB20120312  
EXPNO 2  
PROCNO 1  
Date\_ 20120312  
Time 9.39  
INSTRUM spect  
PROBHD 5 mm PATXO 19F  
PULPROG zg30  
TD 65536  
SOLVENT CDCl3  
NS 16  
DS 2  
SWH 10330.578 Hz  
FIDRES 0.157632 Hz  
AQ 3.1720407 sec  
RG 287.4  
DW 48.400 usec  
DE 6.00 usec  
TE 293.5 K  
D1 1.00000000 sec  
TD0 1

==== CHANNEL f1 =====  
NUC1 1H  
P1 13.70 usec  
PL1 1.00 dB  
SFO1 500.1330885 MHz  
SI 32768  
SF 500.1300131 MHz  
WDW no  
SSB 0  
LB 0.00 Hz  
GB 0  
PC 1.00

1.880

2.313

4.758  
4.769  
5.080  
5.082  
5.100  
5.103  
5.260  
5.263  
5.294  
5.297  
5.922  
5.932  
5.943  
5.953  
5.966  
5.977  
5.987  
5.998  
6.922  
6.931  
6.941  
6.944  
7.054  
7.069  
7.115  
7.128  
7.145  
8.527  
8.536

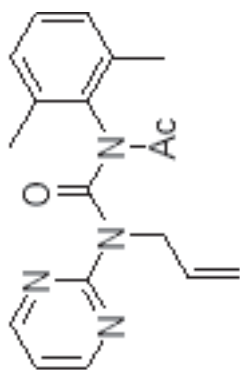

5d

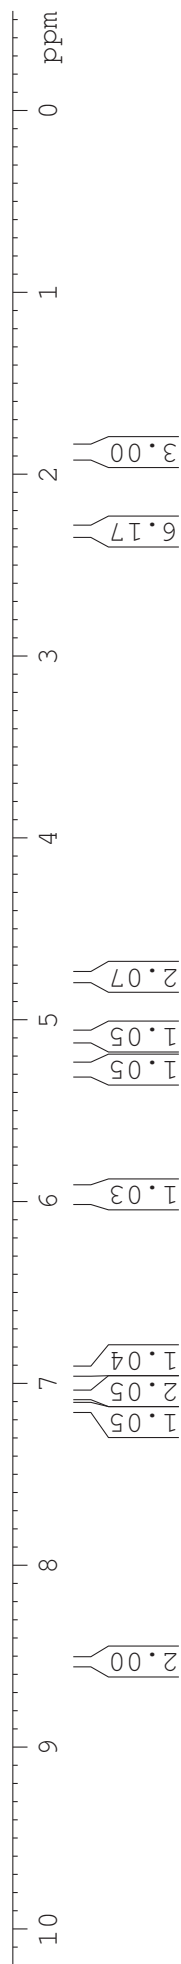

HXM-2-216  
C13CPD CDC13

Current Data Parameters  
NAME XB20120315  
EXPNO 4  
PROCNO 1

F2 - Acquisition Parameters  
Date\_ 20120315  
Time 16.24  
INSTRUM spect  
PROBHD 5 mm PATXO 19F  
PULPROG zgpg30  
TD 65536  
SOLVENT CDC13  
NS 128  
DS 4  
SMH 30030.029 Hz  
FIDRES 0.458222 Hz  
AQ 1.0912410 sec  
RG 161.3  
DW 16.650 usec  
DE 6.00 usec  
TE 295.2 K  
D1 2.00000000 sec  
d11 0.03000000 sec  
DELTA 1.89999998 sec  
ID0 1

=====  
CHANNEL f1 =====  
NUC1 13C  
P1 9.50 usec  
PL1 -0.50 dB  
SFO1 125.7703643 MHz

=====  
CHANNEL f2 =====  
CPDPRG2 waltz16  
NUC2 1H  
PCPD2 80.00 usec  
PL2 1.00 dB  
PL12 16.33 dB  
PL13 16.50 dB  
SFO2 500.1320005 MHz

F2 - Processing parameters  
SI 32768  
SF 125.7577890 MHz  
WDW no  
SSB 0  
LB 0.00 Hz  
GB 0  
PC 1.40

18.71  
24.78

51.13

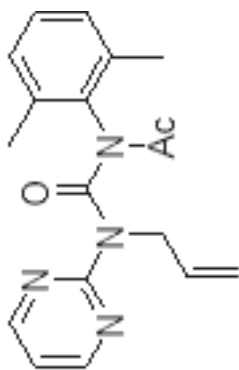

**5d**

172.58  
160.74  
157.63  
154.07  
137.72  
136.83  
133.47  
128.80  
128.48  
116.94  
116.35

200 190 180 170 160 150 140 130 120 110 100 90 80 70 60 50 40 30 20 10 0 ppm

HXM-2-222  
 PROTON CDC13

Current Data Parameters  
 NAME XB20120315  
 EXPNO 1  
 PROCNO 1

F2 - Acquisition Parameters  
 Date\_ 20120315  
 Time 16.04  
 INSTRUM spect  
 PROBHD 5 mm PAXO 19F  
 PULPROG zg30  
 TD 65536  
 SOLVENT CDCl3  
 NS 8  
 DS 2  
 SWH 10330.578 Hz  
 FIDRES 0.157632 Hz  
 AQ 3.1720407 sec  
 RG 161.3  
 DW 48.400 usec  
 DE 6.00 usec  
 TE 294.2 K  
 D1 1.00000000 sec  
 TD0 1

==== CHANNEL f1 =====  
 NUC1 1H  
 P1 13.70 usec  
 PL1 1.00 dB  
 SF01 500.1330885 MHz

F2 - Processing parameters  
 SI 32768  
 SF 500.1300129 MHz  
 WDW no  
 SSB 0  
 LB 0.00 Hz  
 GB 0  
 PC 1.00

2.296  
 1.901  
 1.652  
 1.637  
 1.621  
 1.607  
 1.591  
 1.367  
 1.352  
 1.337  
 1.322  
 1.307  
 1.293  
 0.896  
 0.881  
 0.866

4.131  
 4.116  
 4.101

7.126  
 7.110  
 7.096  
 7.050  
 7.035  
 6.926  
 6.917  
 6.907

8.518  
 8.509

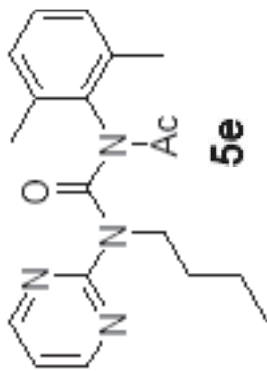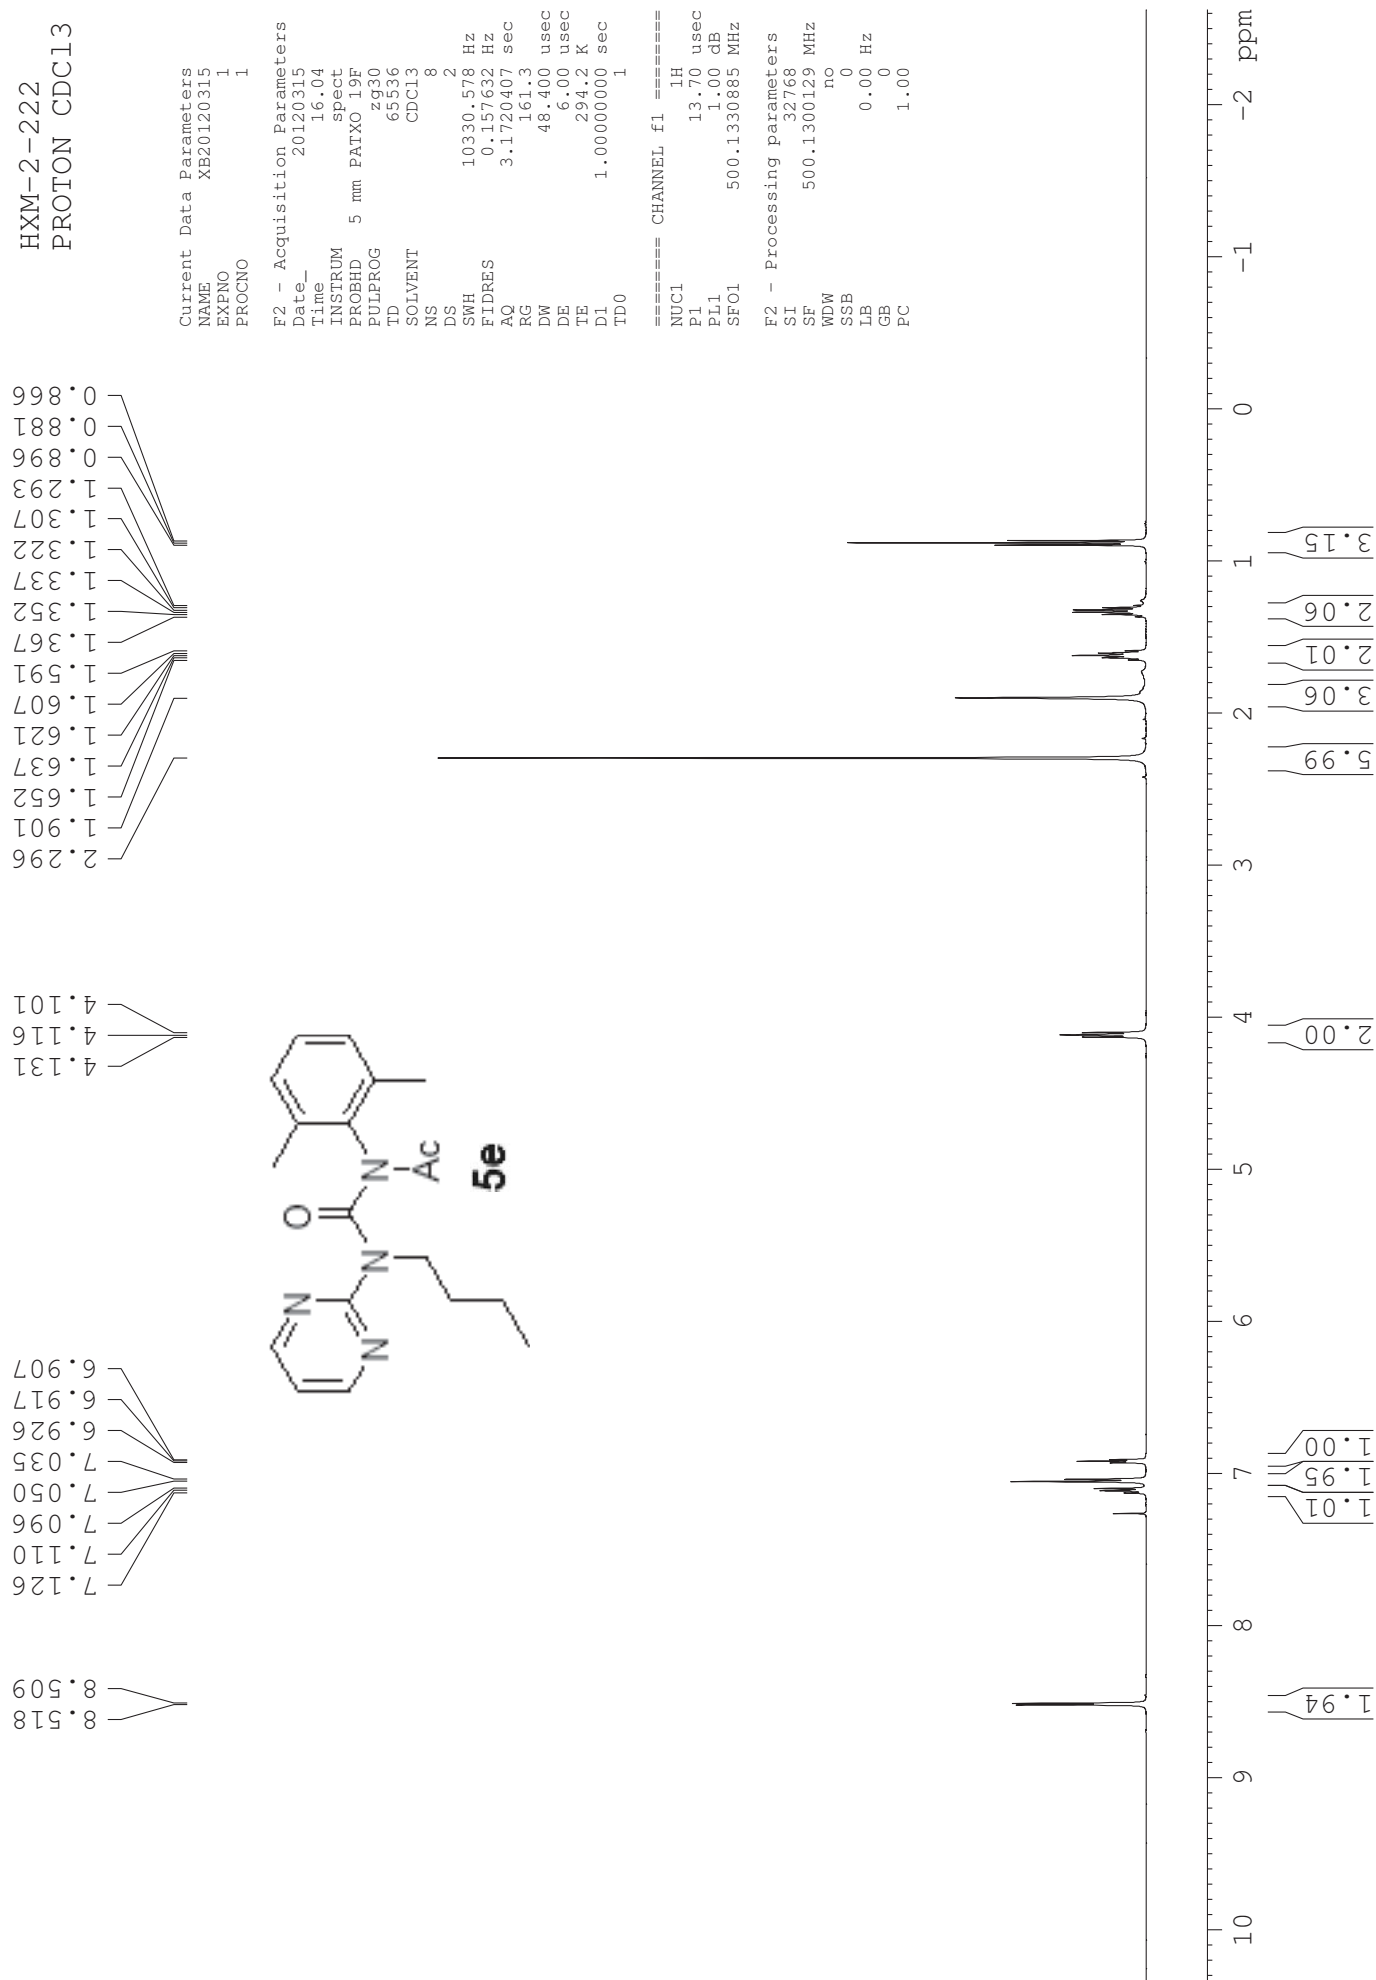

HXM-2-222  
C13CPD CDC13

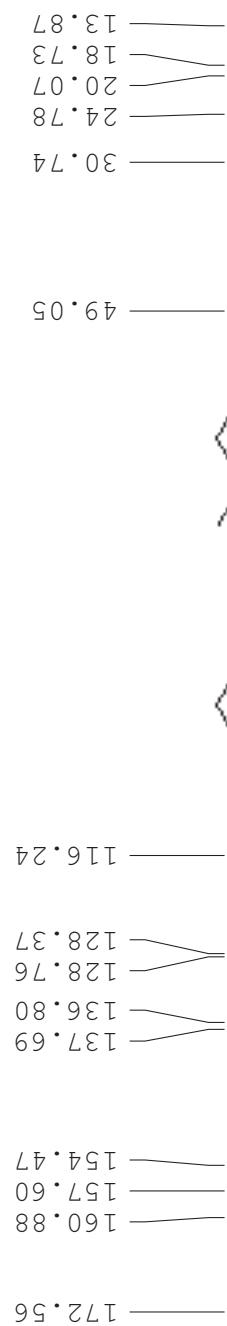

Current Data Parameters  
NAME XB20120315  
EXPNO 5  
PROCNO 1

F2 - Acquisition Parameters  
Date\_ 20120315  
Time 16.36  
INSTRUM spect  
PROBHD 5 mm PATXO 19F  
PULPROG zgpg30  
TD 65536  
SOLVENT CDC13  
NS 128  
DS 4  
SWH 30030.029 Hz  
FIDRES 0.458222 Hz  
AQ 1.0912410 sec  
RG 161.3  
DW 16.650 usec  
DE 6.00 usec  
TE 295.4 K  
D1 2.00000000 sec  
d11 0.03000000 sec  
DELTA 1.89999998 sec  
TD0 1

==== CHANNEL f1 =====  
NUC1 13C  
P1 9.50 usec  
PL1 -0.50 dB  
SFO1 125.7703643 MHz

==== CHANNEL f2 =====  
CPDPRG2 waltz16  
NUC2 1H  
PCPD2 80.00 usec  
PL2 1.00 dB  
PL12 16.33 dB  
PL13 16.50 dB  
SFO2 500.1320005 MHz

F2 - Processing parameters  
SI 32768  
SF 125.7577890 MHz  
WDW no  
SSB 0  
LB 0.00 Hz  
GB 0  
PC 1.40

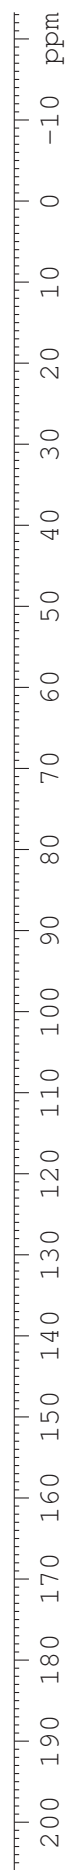



HXM-2-229  
 PROTON CDCl<sub>3</sub>

NAME XB20120322  
 EXPNO 1  
 PROCNO 1  
 Date\_ 20120322  
 Time 9.42  
 INSTRUM spect  
 PROBHD 5 mm PATXO 19F  
 PULPROG zg30  
 TD 65536  
 SOLVENT CDCl<sub>3</sub>  
 NS 16  
 DS 2  
 SWH 10330.578 Hz  
 FIDRES 0.157632 Hz  
 AQ 3.1720407 sec  
 RG 362  
 DW 48.400 usec  
 DE 6.00 usec  
 TE 293.7 K  
 D1 1.00000000 sec  
 TD0 1

==== CHANNEL f1 =====  
 NUC1 1H  
 P1 13.70 usec  
 PL1 1.00 dB  
 SFO1 500.1330885 MHz  
 SI 32768  
 SF 500.1300130 MHz  
 WDW no  
 SSB 0  
 LB 0.00 Hz  
 GB 0  
 PC 1.00

2.384  
 2.086

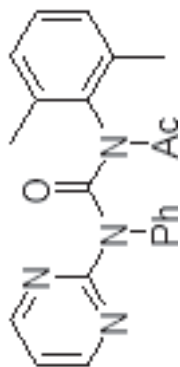

**5f**

8.529  
 8.520  
 7.296  
 7.290  
 7.081  
 7.066  
 7.051  
 6.965  
 6.956  
 6.946  
 6.933  
 6.919

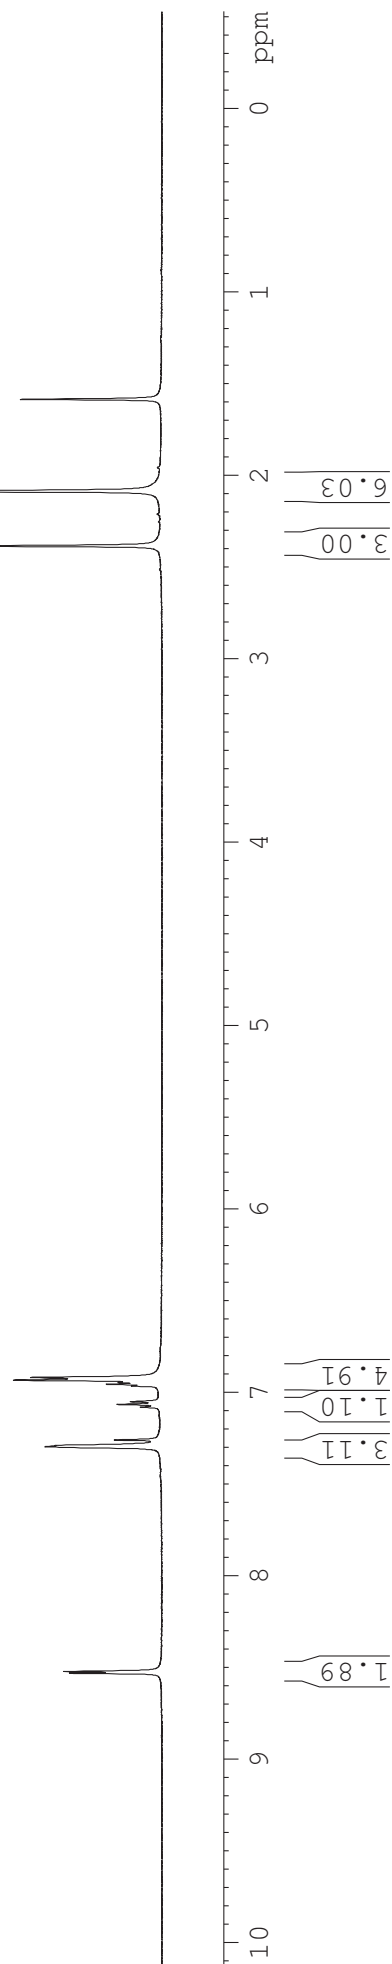





HXM-2-266  
C13CPD CDC13

NAME XB20120428  
EXPNO 11  
PROCNO 1  
Date\_ 20120428  
Time 10.39  
INSTRUM spect  
PROBHD 5 mm PATXO 19F  
PULPROG zgpg30  
TD 65536  
SOLVENT CDC13  
NS 128  
DS 4  
SWH 30030.029 Hz  
FIDRES 0.458222 Hz  
AQ 1.0912410 sec  
RG 143.7  
DW 16.650 usec  
DE 6.00 usec  
TE 295.8 K  
D1 2.00000000 sec  
d11 0.03000000 sec  
DELTA 1.89999998 sec  
TD0 1

==== CHANNEL f1 =====  
NUC1 13C  
P1 9.50 usec  
PL1 -0.50 dB  
SFO1 125.7703643 MHz  
  
==== CHANNEL f2 =====  
CPDPRG2 waltz16  
NUC2 1H  
PCPD2 80.00 usec  
PL2 1.00 dB  
PL12 16.31 dB  
PL13 16.50 dB  
SFO2 500.1320005 MHz  
SI 32768  
SF 125.7577890 MHz  
WDW EM  
SSB 0  
LB 3.00 Hz  
GB 0  
PC 1.40

18.53  
25.10

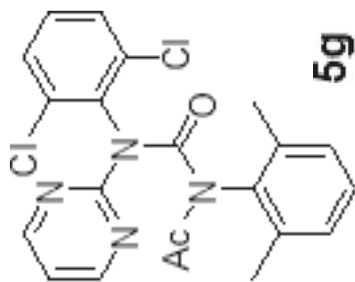

172.79  
160.44  
157.98  
137.32  
136.26  
135.65  
129.30  
128.82  
128.77  
128.54  
116.97

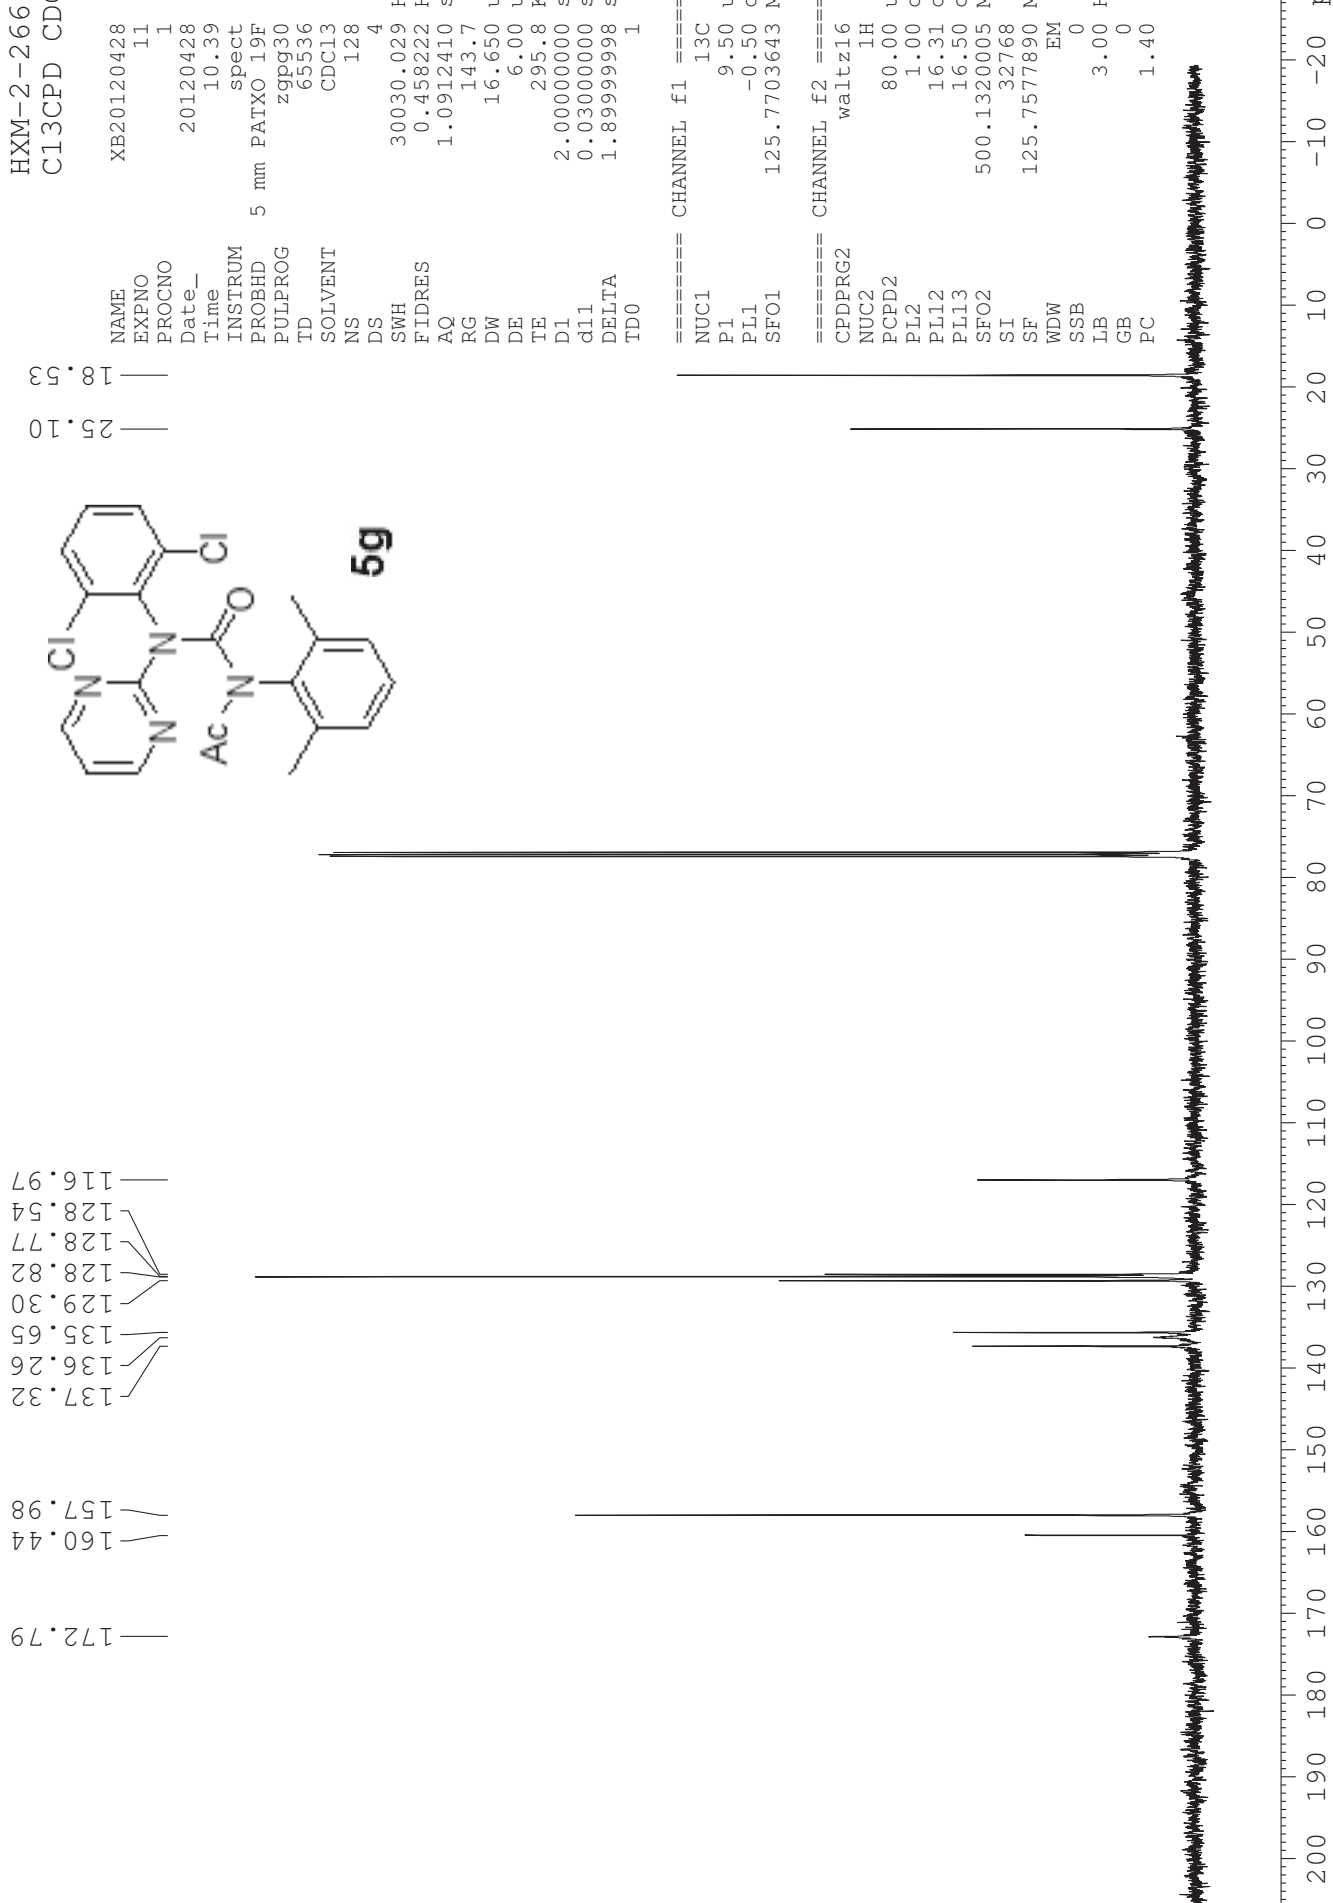

HXM-2-339  
 PROTON CDC13

0.711  
 8.701  
 7.441  
 7.425  
 7.410  
 7.353  
 7.347  
 7.345  
 7.338  
 7.330  
 7.316  
 7.206  
 7.196  
 7.187  
 2.774  
 2.759  
 2.745  
 2.594  
 2.579  
 1.699  
 1.684  
 1.670  
 1.656  
 1.347  
 1.328  
 1.300  
 1.285  
 1.271  
 1.249  
 0.882  
 0.869  
 0.855

Current Data Parameters  
 NAME XB20120531  
 EXPNO 3  
 PROCNO 1

F2 - Acquisition Parameters  
 Date\_ 20120531  
 Time 9.49  
 INSTRUM spect  
 PROBHD 5 mm PATXO 19F  
 PULPROG zg30  
 TD 65536  
 SOLVENT CDC13  
 NS 8  
 DS 2  
 SWH 10330.578 Hz  
 FIDRES 0.157632 Hz  
 AQ 3.1720407 sec  
 RG 57  
 DW 48.400 usec  
 DE 6.00 usec  
 TE 298.1 K  
 D1 1.00000000 sec  
 TD0 1

==== CHANNEL f1 =====  
 NUC1 1H  
 P1 13.72 usec  
 PL1 1.00 dB  
 SFO1 500.1330885 MHz

F2 - Processing parameters  
 SI 32768  
 SF 500.1300129 MHz  
 WDW no  
 SSB 0  
 LB 0.00 Hz  
 GB 0  
 PC 1.00

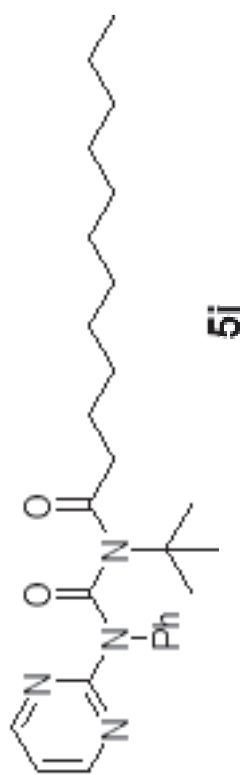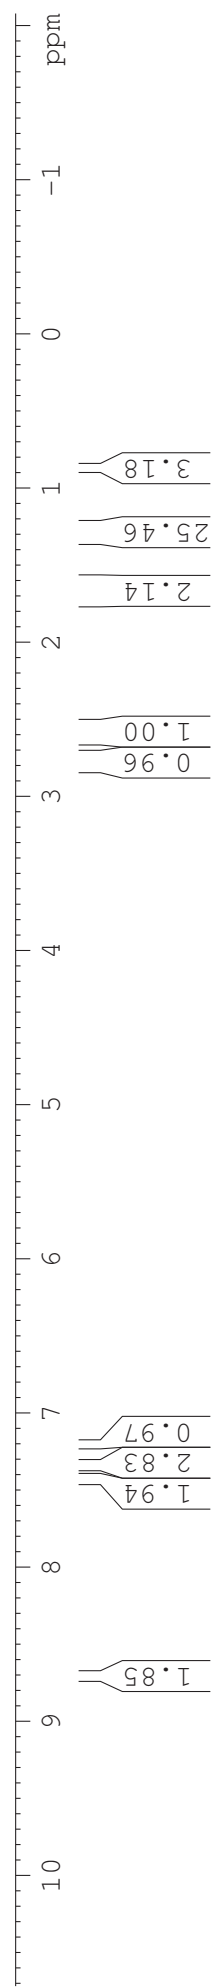

HXM-2-339  
 C13CPD CDC13

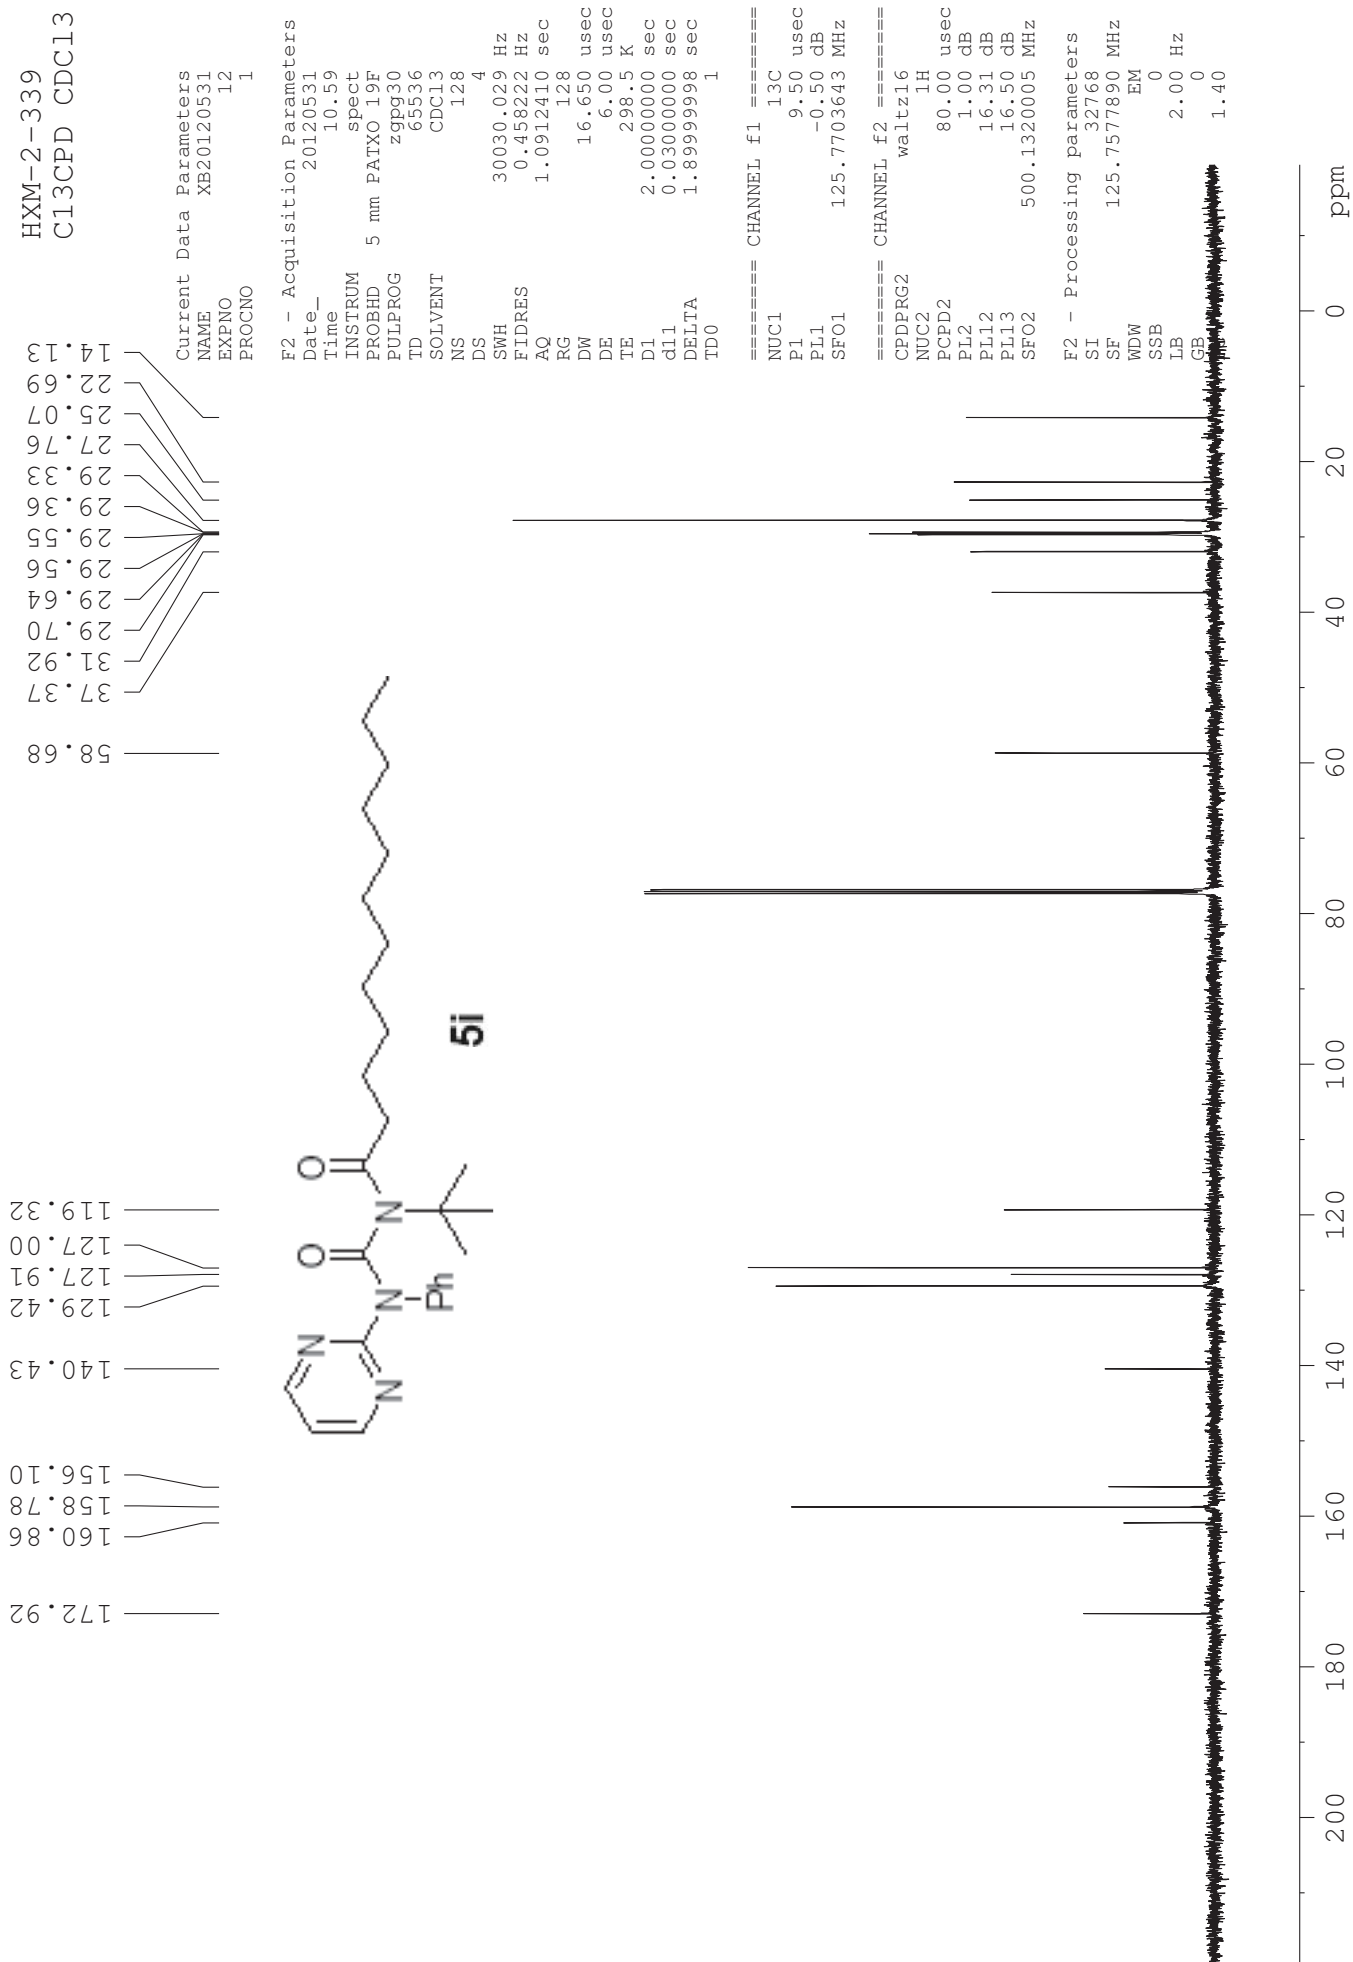

HXM-2-359  
 PROTON CDCl3

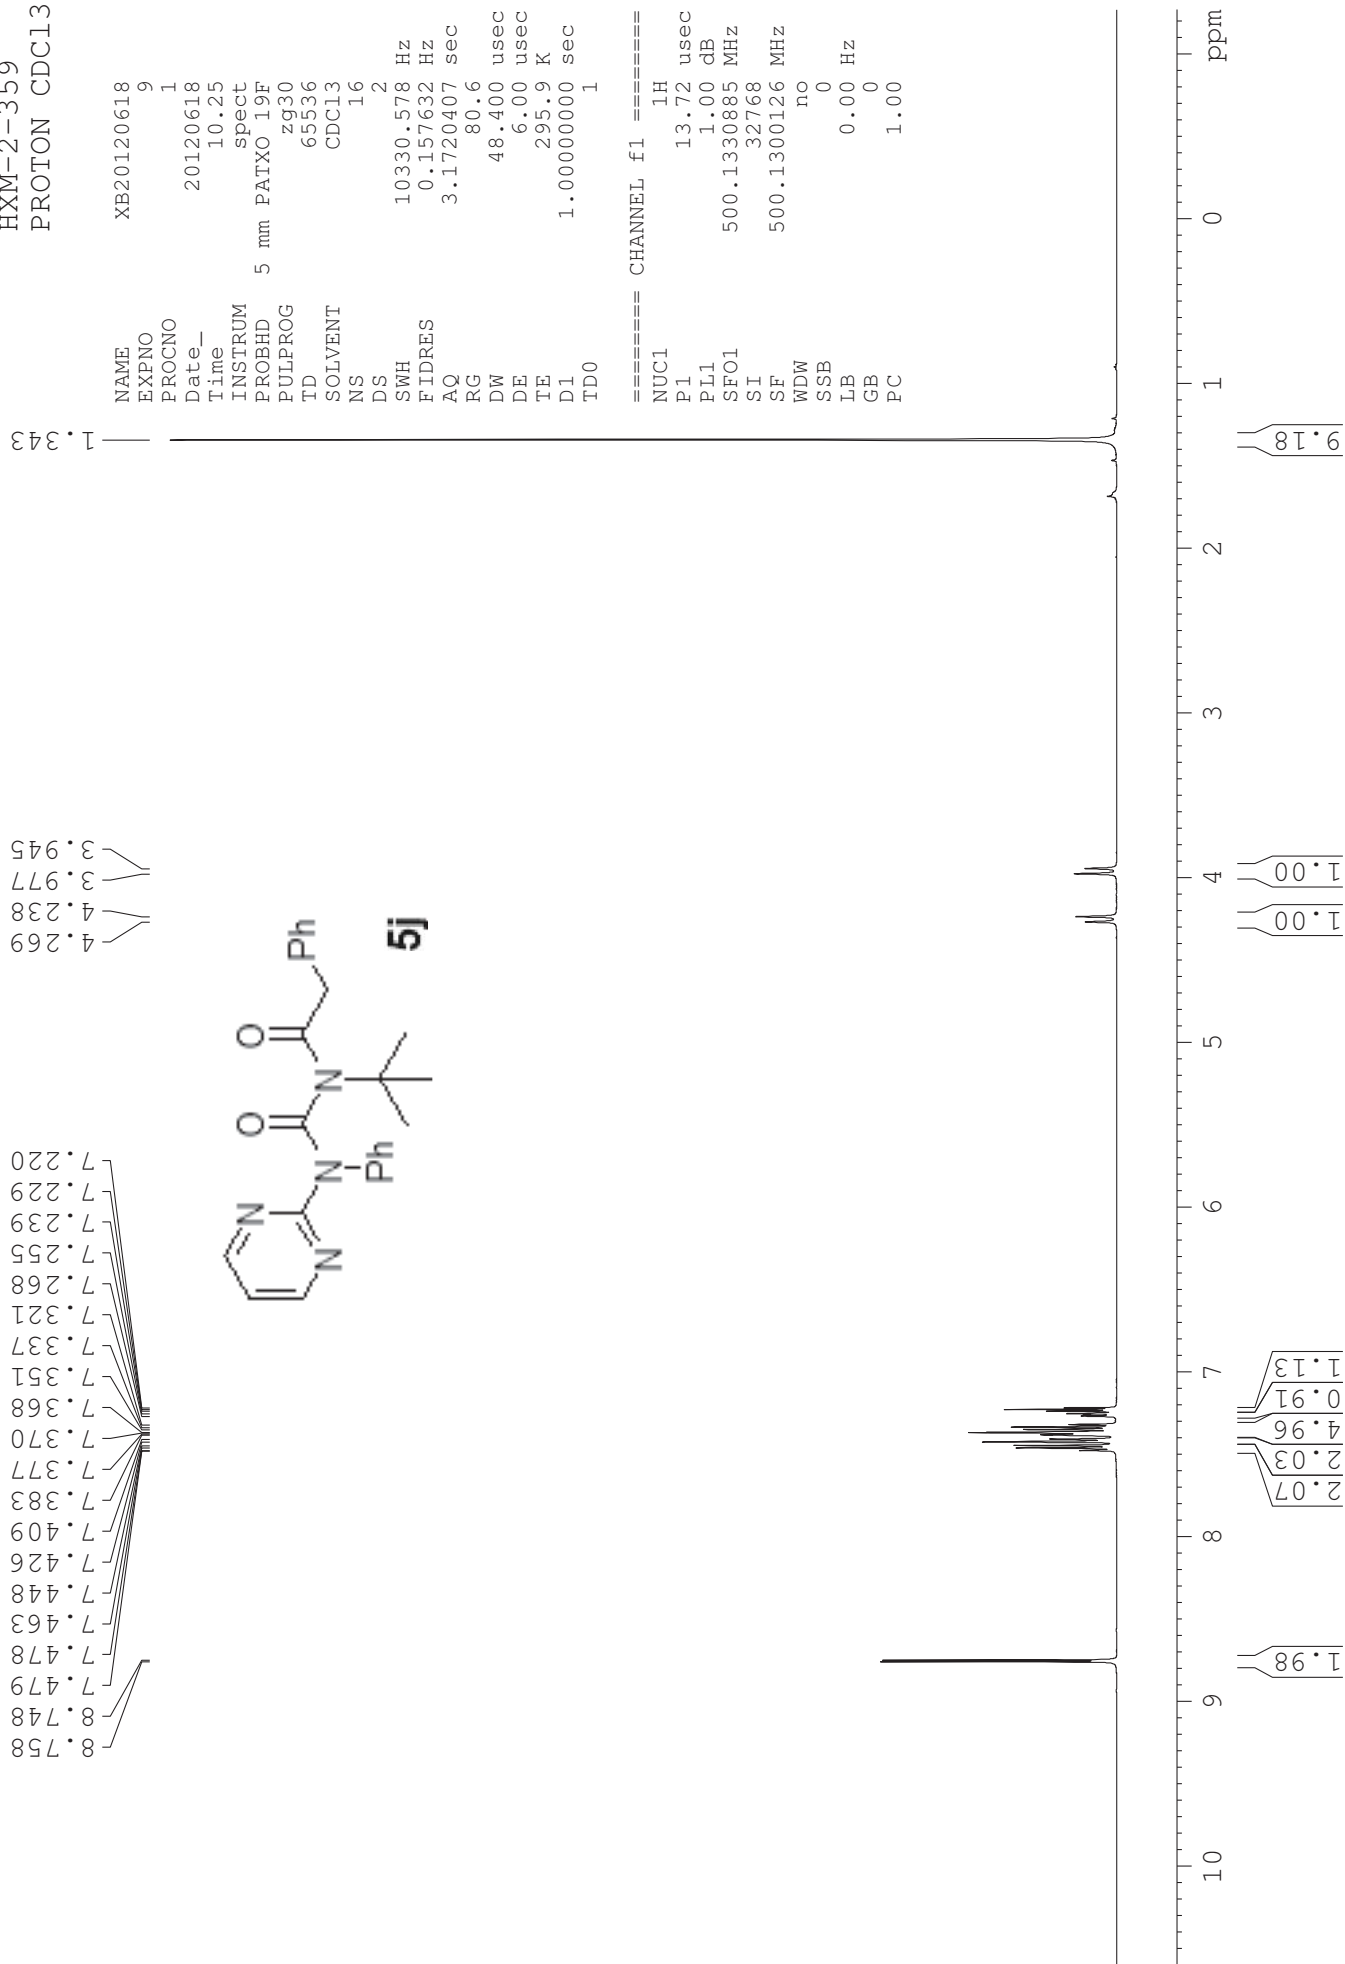

HXM-2-359  
 C13CPD CDCl3

NAME XB20120618  
 EXPNO 10  
 PROCNO 1  
 Date\_ 20120618  
 Time 10.34  
 INSTRUM spect  
 PROBHD 5 mm PATXO 19F  
 PULPROG zgpg30  
 TD 65536  
 SOLVENT CDCl3  
 NS 128  
 DS 4  
 SWH 30030.029 Hz  
 FIDRES 0.458222 Hz  
 AQ 1.0912410 sec  
 RG 143.7  
 DW 16.650 usec  
 DE 6.00 usec  
 TE 297.0 K  
 D1 2.0000000 sec  
 d11 0.0300000 sec  
 DELTA 1.89999998 sec  
 TD0 1

==== CHANNEL f1 =====  
 NUC1 13C  
 P1 9.50 usec  
 PL1 -0.50 dB  
 SFO1 125.7703643 MHz  
 ===== CHANNEL f2 =====  
 CPDPRG2 waltz16  
 NUC2 1H  
 PCPD2 80.00 usec  
 PL2 1.00 dB  
 PLI2 16.31 dB  
 PLI3 16.50 dB  
 SFO2 500.1320005 MHz  
 SI 32768  
 SF 125.7577890 MHz  
 WDW EM  
 SSB 0  
 LB 2.00 Hz  
 GB 0  
 PC 1.40

170.73  
 160.87  
 158.91  
 156.06  
 140.33  
 135.51  
 130.04  
 129.52  
 128.27  
 128.07  
 127.03  
 126.63  
 119.54  
 59.12  
 43.78  
 27.75

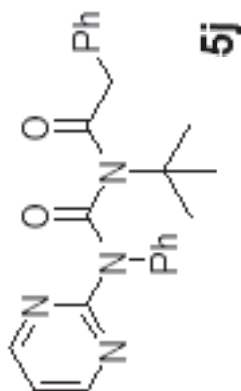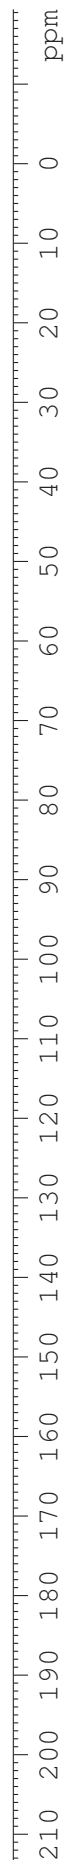



HXM-2-332  
PROTON CDC13 I

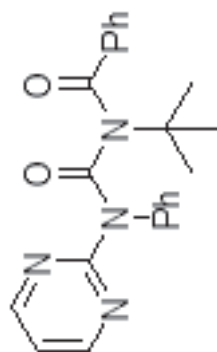

8.575  
8.567  
7.479  
7.477  
7.465  
7.450  
7.443  
7.428  
7.382  
7.367  
7.352  
7.280  
7.275  
7.271  
7.261  
7.247  
7.243  
7.235  
7.230  
7.221  
7.217  
7.214  
7.050  
7.041  
7.031  
6.660  
6.646

Current Data Parameters  
NAME XB20120531  
EXPNO 1  
PROCNO 1

F2 - Acquisition Parameters  
Date\_ 20120531  
Time 9.39  
INSTRUM spect  
PROBHD 5 mm PATXO 19F  
PULPROG zg30  
TD 65536  
SOLVENT CDC13  
NS 8  
DS 2  
SWH 10330.578 Hz  
FIDRES 0.157632 Hz  
AQ 3.1720407 sec  
RG 71.8  
DW 48.400 usec  
DE 6.00 usec  
TE 298.5 K  
D1 1.00000000 sec  
TD0 1

==== CHANNEL f1 =====  
NUC1 1H  
P1 13.72 usec  
PL1 1.00 dB  
SF01 500.1330885 MHz

F2 - Processing parameters  
SI 32768  
SF 500.1300126 MHz  
WDW EM  
SSB 0  
LB 0.30 Hz  
GB 0  
PC 1.00

1.696

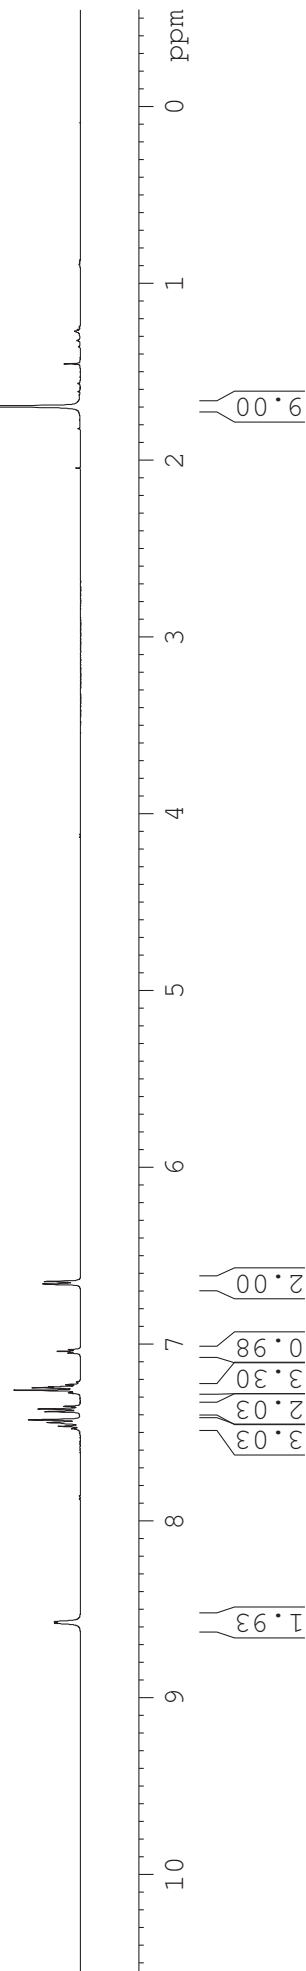

HXM-2-332  
C13CPD CDC13 I

170.03  
160.44  
158.05  
155.61  
140.27  
138.01  
130.96  
129.05  
128.17  
127.92  
127.67  
127.29  
117.62

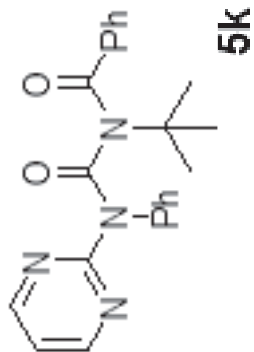

60.37  
28.71

Current Data Parameters  
NAME XB20120531  
EXNO 10  
PROCNO 1

F2 - Acquisition Parameters  
Date\_ 20120531  
Time 10.36  
INSTRUM spect  
PROBHD 5 mm PATXO 19F  
PULPROG zgpg30  
TD 65536  
SOLVENT CDC13  
NS 128  
DS 4  
SWH 30030.029 Hz  
FIDRES 0.458222 Hz  
AQ 1.0912410 sec  
RG 287.4  
DW 16.650 usec  
DE 6.00 usec  
TE 298.3 K  
D1 2.0000000 sec  
d11 0.0300000 sec  
DELTA 1.89999998 sec  
TD0 1

==== CHANNEL f1 =====  
NUC1 13C  
PI 9.50 usec  
PL1 -0.50 dB  
SFO1 125.7703643 MHz

==== CHANNEL f2 =====  
CPDPRG2 waltz16  
NUC2 1H  
PCPD2 80.00 usec  
PL2 1.00 dB  
PL12 16.31 dB  
PL13 16.50 dB  
SFO2 500.1320005 MHz

F2 - Processing parameters  
SI 32768  
SF 125.7577890 MHz  
WDW no  
SSB 0  
LB 0.00 Hz  
GB 0  
PC 1.40

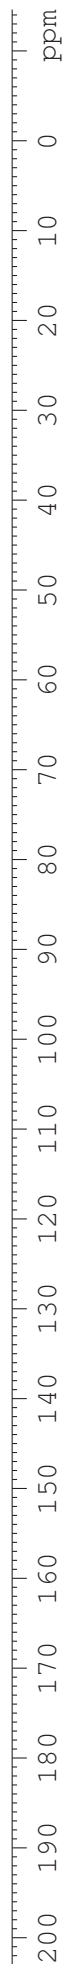

HXM-2-338  
PROTON CDC13

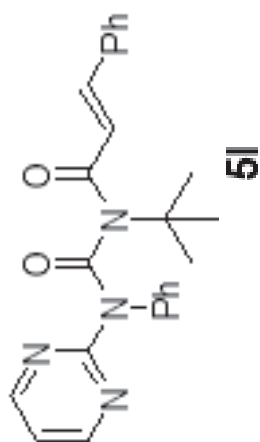

8.704  
8.694  
8.632  
8.602  
7.589  
7.576  
7.440  
7.424  
7.409  
7.378  
7.366  
7.364  
7.352  
7.345  
7.339  
7.288  
7.260  
7.172  
7.163  
7.153

Current Data Parameters  
NAME XB20120531  
EXPNO 2  
PROCNO 1

F2 - Acquisition Parameters  
Date\_ 20120531  
Time 9.44  
INSTRUM spect  
PROBHD 5 mm PATXO 19F  
PULPROG zg30  
TD 65536  
SOLVENT CDC13  
NS 8  
DS 2  
SWH 10330.578 Hz  
FIDRES 0.157632 Hz  
AQ 3.1720407 sec  
RG 71.8  
DM 48.400 usec  
DE 6.00 usec  
TE 298.4 K  
D1 1.00000000 sec  
TD0 1

=====  
CHANNEL f1  
NUC1 1H  
P1 13.72 usec  
PL1 1.00 dB  
SFO1 500.1330885 MHz

F2 - Processing parameters  
SI 32768  
SF 500.1300126 MHz  
WDW EM  
SSB 0  
LB 0.30 Hz  
GB 0  
PC 1.00

1.478

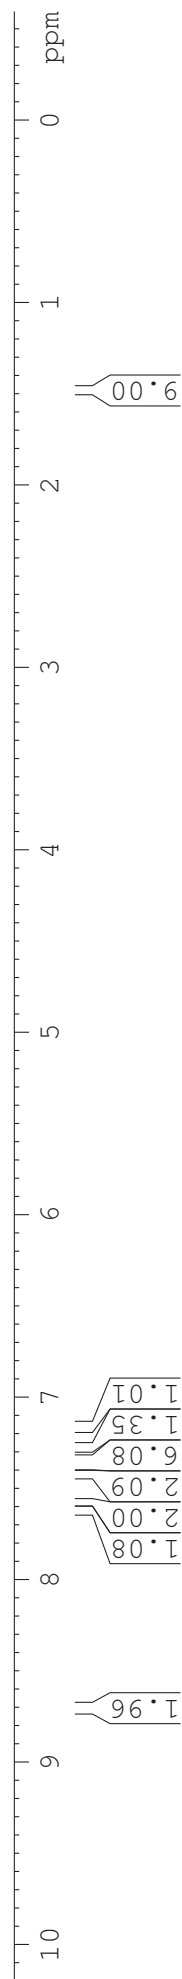

HXM-2-338  
C13CPD CDC13 I

28.03

59.29

165.44  
160.95  
158.78  
156.04  
141.98  
140.30  
135.29  
129.69  
129.49  
128.81  
128.17  
128.15  
127.47  
121.65  
119.12

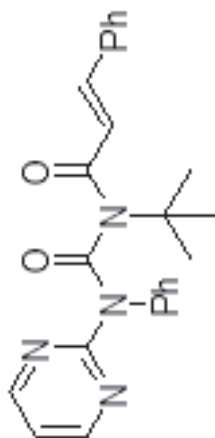

5I

Current Data Parameters  
NAME XB20120531  
EXENO 11  
PROCNO 1

F2 - Acquisition Parameters  
Date\_ 20120531  
Time\_ 10.49  
INSTRUM spect  
PROBHD 5 mm PAXO 19F  
PULPROG zgpg30  
TD 65536  
SOLVENT CDCl3  
NS 128  
DS 4  
SWH 30030.029 Hz  
FIDRES 0.458222 Hz  
AQ 1.0912410 sec  
RG 128  
DM 16.650 usec  
DE 6.00 usec  
TE 298.5 K  
D1 2.00000000 sec  
d11 0.03000000 sec  
DELTA 1.89999998 sec  
TD0 1

==== CHANNEL f1 =====  
NUC1 13C  
P1 9.50 usec  
PL1 -0.50 dB  
SFO1 125.7703643 MHz

==== CHANNEL f2 =====  
CPDPRG2 waltz16  
NUC2 1H  
PCPD2 80.00 usec  
PL2 1.00 dB  
PL12 16.31 dB  
PL13 16.50 dB  
SFO2 500.1320005 MHz

F2 - Processing parameters  
SI 32768  
SF 125.7577890 MHz  
WDW no  
SSB 0  
LB 0.00 Hz  
GB 0  
FC 1.40

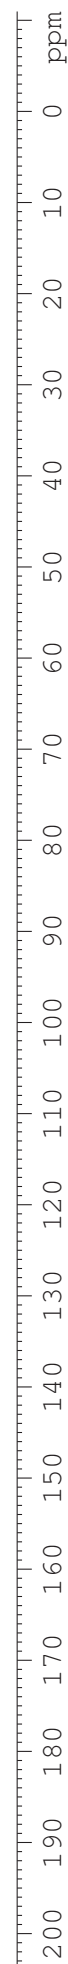

HXM-2-352  
PROTON CDCL3

NAME XB20120618  
EXPNO 7  
PROCNO 1  
Date\_ 20120618  
Time 10.11  
INSTRUM spect  
PROBHD 5 mm PATXO 19F  
PULPROG zg30  
TD 65536  
SOLVENT CDCL3  
NS 8  
DS 2  
SWH 10330.578 Hz  
FIDRES 0.157632 Hz  
AQ 3.1720407 sec  
RG 80.6  
DW 48.400 usec  
DE 6.00 usec  
TE 295.7 K  
D1 1.0000000 sec  
TD0 1  
===== CHANNEL f1 =====  
NUC1 1H  
P1 13.72 usec  
PL1 1.00 dB  
SFO1 500.1330885 MHz  
SI 32768  
SF 500.1300129 MHz  
WDW no  
SSB 0  
LB 0.00 Hz  
GB 0  
PC 1.00

1.886  
1.882  
1.872  
1.869  
1.396  
6.511  
6.514  
6.517  
6.538  
6.540  
6.544  
6.804  
6.817  
6.817  
6.831  
6.847  
6.847  
6.861  
6.875  
6.875  
7.153  
7.163  
7.172  
7.172  
7.331  
7.346  
7.346  
7.398  
7.398  
7.415  
7.429  
7.429  
8.683  
8.683  
8.693

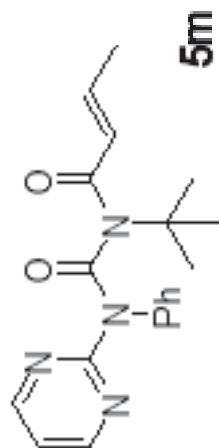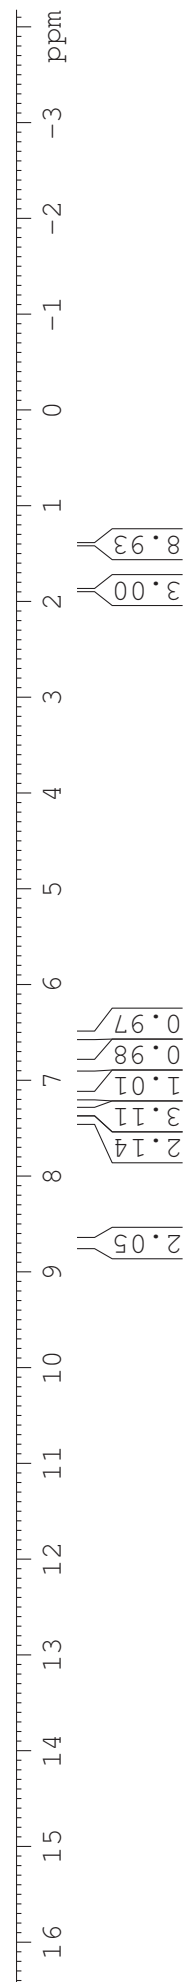

HXM-2-352  
 C13CPD CDCl3

165.49  
 160.88  
 158.72  
 156.06  
 141.12  
 140.40  
 129.40  
 127.99  
 127.28  
 125.70  
 119.07

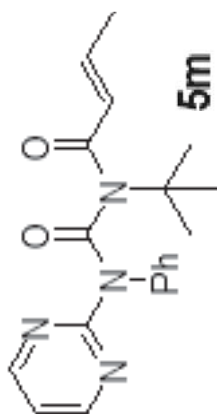

NAME XB20120618  
 EXPNO 8  
 PROCNO 1  
 Date\_ 20120618  
 Time 10.19  
 INSTRUM spect  
 PROBD 5 mm PATXO 19F  
 PULPROG zgpg30  
 TD 65536  
 SOLVENT CDCl3  
 NS 128  
 DS 4  
 SWH 30030.029 Hz  
 FIDRES 0.458222 Hz  
 AQ 1.0912410 sec  
 RG 143.7  
 DW 16.650 usec  
 DE 6.00 usec  
 TE 296.8 K  
 D1 2.00000000 sec  
 d11 0.03000000 sec  
 DELTA 1.89999998 sec  
 TD0 1

==== CHANNEL f1 =====  
 NUC1 13C  
 P1 9.50 usec  
 PL1 -0.50 dB  
 SFO1 125.7703643 MHz

==== CHANNEL f2 =====  
 CPDPRG2 waltz16  
 NUC2 1H  
 PCPD2 80.00 usec  
 PL2 1.00 dB  
 PL12 16.31 dB  
 PL13 16.50 dB  
 SFO2 500.1320005 MHz  
 SI 32768  
 SF 125.7577890 MHz  
 WDW EM  
 SSB 0  
 LB 1.00 Hz  
 GB 0  
 PC 1.40

59.00  
 27.90  
 18.13

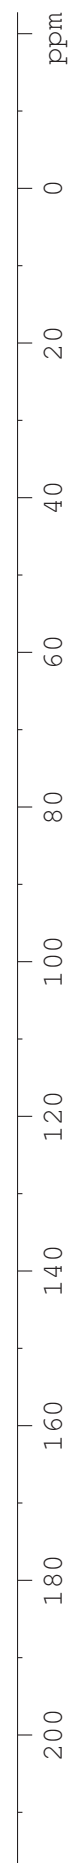

HXM-2-378-2  
 PROTON CDCl3

NAME XB20121219  
 EXPNO 8  
 PROCNO 1  
 Date\_ 20121219  
 Time 11.14  
 INSTRUM spect  
 PROBHD 5 mm PAXO 19F  
 PULPROG zg30  
 TD 65536  
 SOLVENT CDCl3  
 NS 8  
 DS 2  
 SWH 10330.578 Hz  
 FIDRES 0.157632 Hz  
 AQ 3.1720407 sec  
 RG 161.3  
 DW 48.400 usec  
 DE 6.00 usec  
 TE 296.9 K  
 D1 1.00000000 sec  
 TD0 1

==== CHANNEL f1 =====  
 NUC1 1H  
 P1 13.72 usec  
 PL1 1.00 dB  
 SFO1 500.1330885 MHz  
 SI 32768  
 SF 500.1300126 MHz  
 WDW no  
 SSB 0  
 LB 0.00 Hz  
 GB 0  
 PC 1.00

1.566

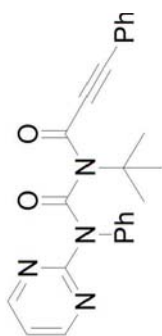

**5n**

8.683  
 8.673  
 7.579  
 7.564  
 7.397  
 7.347  
 7.328  
 7.313  
 7.298  
 7.154  
 7.145  
 7.136

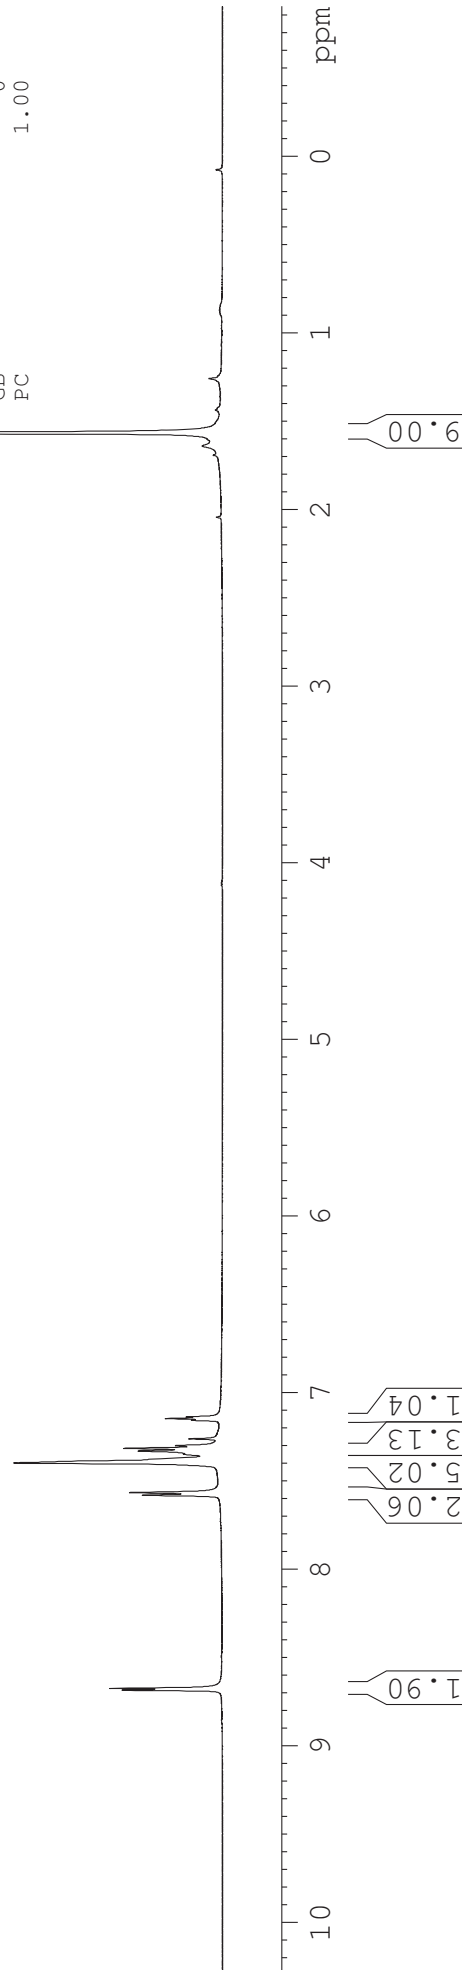

HXM-2-378-2  
 C13CPD CDC13

```

NAME       XB20121219
EXPNO     21
PROCNO    1
Date_     20121219
Time      17.41
INSTRUM   spect
PROBHD    5 mm PATXO 19F
PULPROG   zgpg30
TD        65536
SOLVENT   CDC13
NS        128
DS        4
SWH       30030.029 Hz
FIDRES    0.458222 Hz
AQ        1.0912410 sec
RG        161.3
DE        16.650 usec
TE        6.00 usec
TE        297.6 K
D1        2.00000000 sec
d11       0.03000000 sec
DELTA     1.89999998 sec
TD0       1
    
```

```

===== CHANNEL f1 =====
NUC1      13C
P1        9.50 usec
PL1      -0.50 dB
SFO1     125.7703643 MHz
    
```

```

===== CHANNEL f2 =====
CPDPRG2   waltz16
NUC2      1H
P2        80.00 usec
PL2       1.00 dB
PL12     16.31 dB
PL13     16.50 dB
SFO2     500.1320005 MHz
SI        32768
SF       125.7577890 MHz
WDW       EM
SSB       0
LB        1.00 Hz
GB        0
PC        1.40
    
```

160.76  
 158.35  
 154.50  
 151.79  
 140.77  
 132.88  
 130.07  
 129.34  
 128.38  
 128.01  
 127.62  
 120.42  
 118.65

88.32  
 83.64  
 60.08  
 27.71

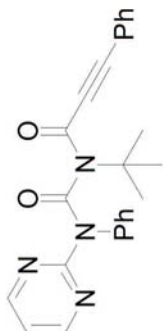

**5n**

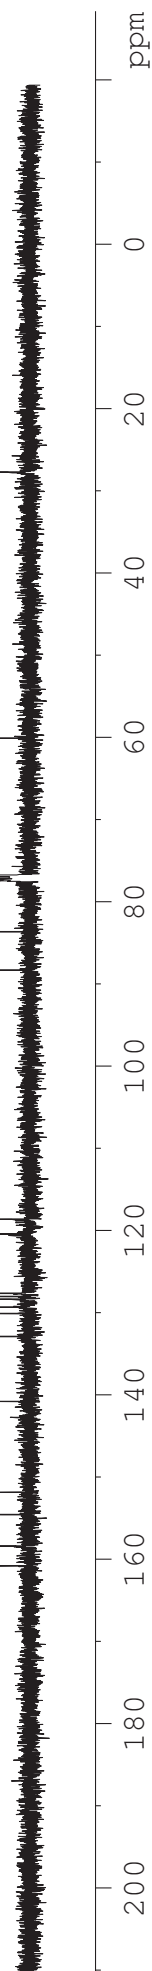



HXM-2-358  
PROTON CDCl<sub>3</sub>

1.351

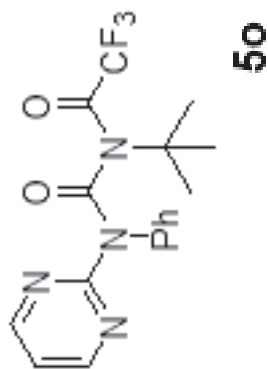

8.690  
8.680  
7.475  
7.461  
7.445  
7.403  
7.388  
7.373  
7.326  
7.311  
7.193  
7.183  
7.174

NAME XB20120611  
EXPNO 14  
PROCNO 1  
Date\_ 20120611  
Time 14.33  
INSTRUM spect  
PROBHD 5 mm PATXO 19F  
PULPROG zg30  
TD 65536  
SOLVENT CDCl<sub>3</sub>  
NS 16  
DS 2  
SWH 10330.578 Hz  
FIDRES 0.157632 Hz  
AQ 3.1720407 sec  
RG 256  
DW 48.400 usec  
DE 6.00 usec  
TE 296.8 K  
D1 1.00000000 sec  
TD0 1

==== CHANNEL f1 =====  
NUC1 1H  
P1 13.72 usec  
PL1 1.00 dB  
SF01 500.1330885 MHz  
SI 32768  
SF 500.1300129 MHz  
WDW EM  
SSB 0  
LB 0.30 Hz  
GB 0  
PC 1.00

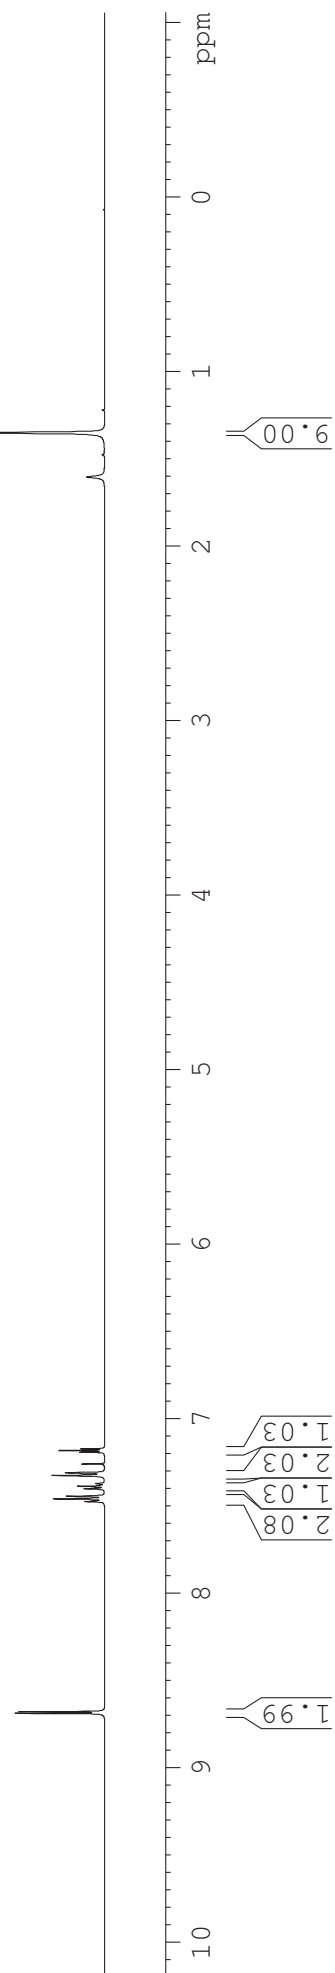

HXM-2-358  
left CDCl3 D:\ den

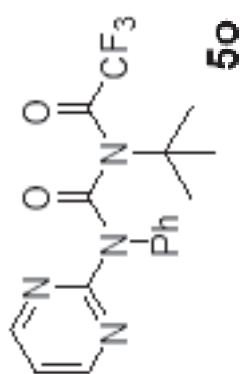

— -70.743

0 -20 -40 -60 -80 -100 -120 -140 -160 -180 ppm

HXM-2-358  
 C13CPD CDC13

NAME XB20120618  
 EXPNO 12  
 PROCNO 1  
 Date\_ 20120618  
 Time 10.48  
 INSTRUM spect  
 PROBHD 5 mm PATXO 19F  
 PULPROG zgpg30  
 TD 65536  
 SOLVENT CDC13  
 NS 128  
 DS 4  
 SWH 30030.029 Hz  
 FIDRES 0.458222 Hz  
 AQ 1.0912410 sec  
 RG 1290.2  
 DW 16.650 usec  
 DE 6.00 usec  
 TE 297.0 K  
 D1 2.00000000 sec  
 d11 0.03000000 sec  
 DELTA 1.89999998 sec  
 TD0 1

==== CHANNEL f1 =====  
 NUC1 13C  
 P1 9.50 usec  
 PL1 -0.50 dB  
 SFO1 125.7703643 MHz  
 ===== CHANNEL f2 =====  
 CPDPRG2 waltz16  
 NUC2 1H  
 PCPD2 80.00 usec  
 PL2 1.00 dB  
 PL12 16.31 dB  
 PL13 16.50 dB  
 SFO2 500.1320005 MHz  
 SI 32768  
 SF 125.7577890 MHz  
 WDW EM  
 SSB 0  
 LB 2.00 Hz  
 GB 0  
 PC 0.20

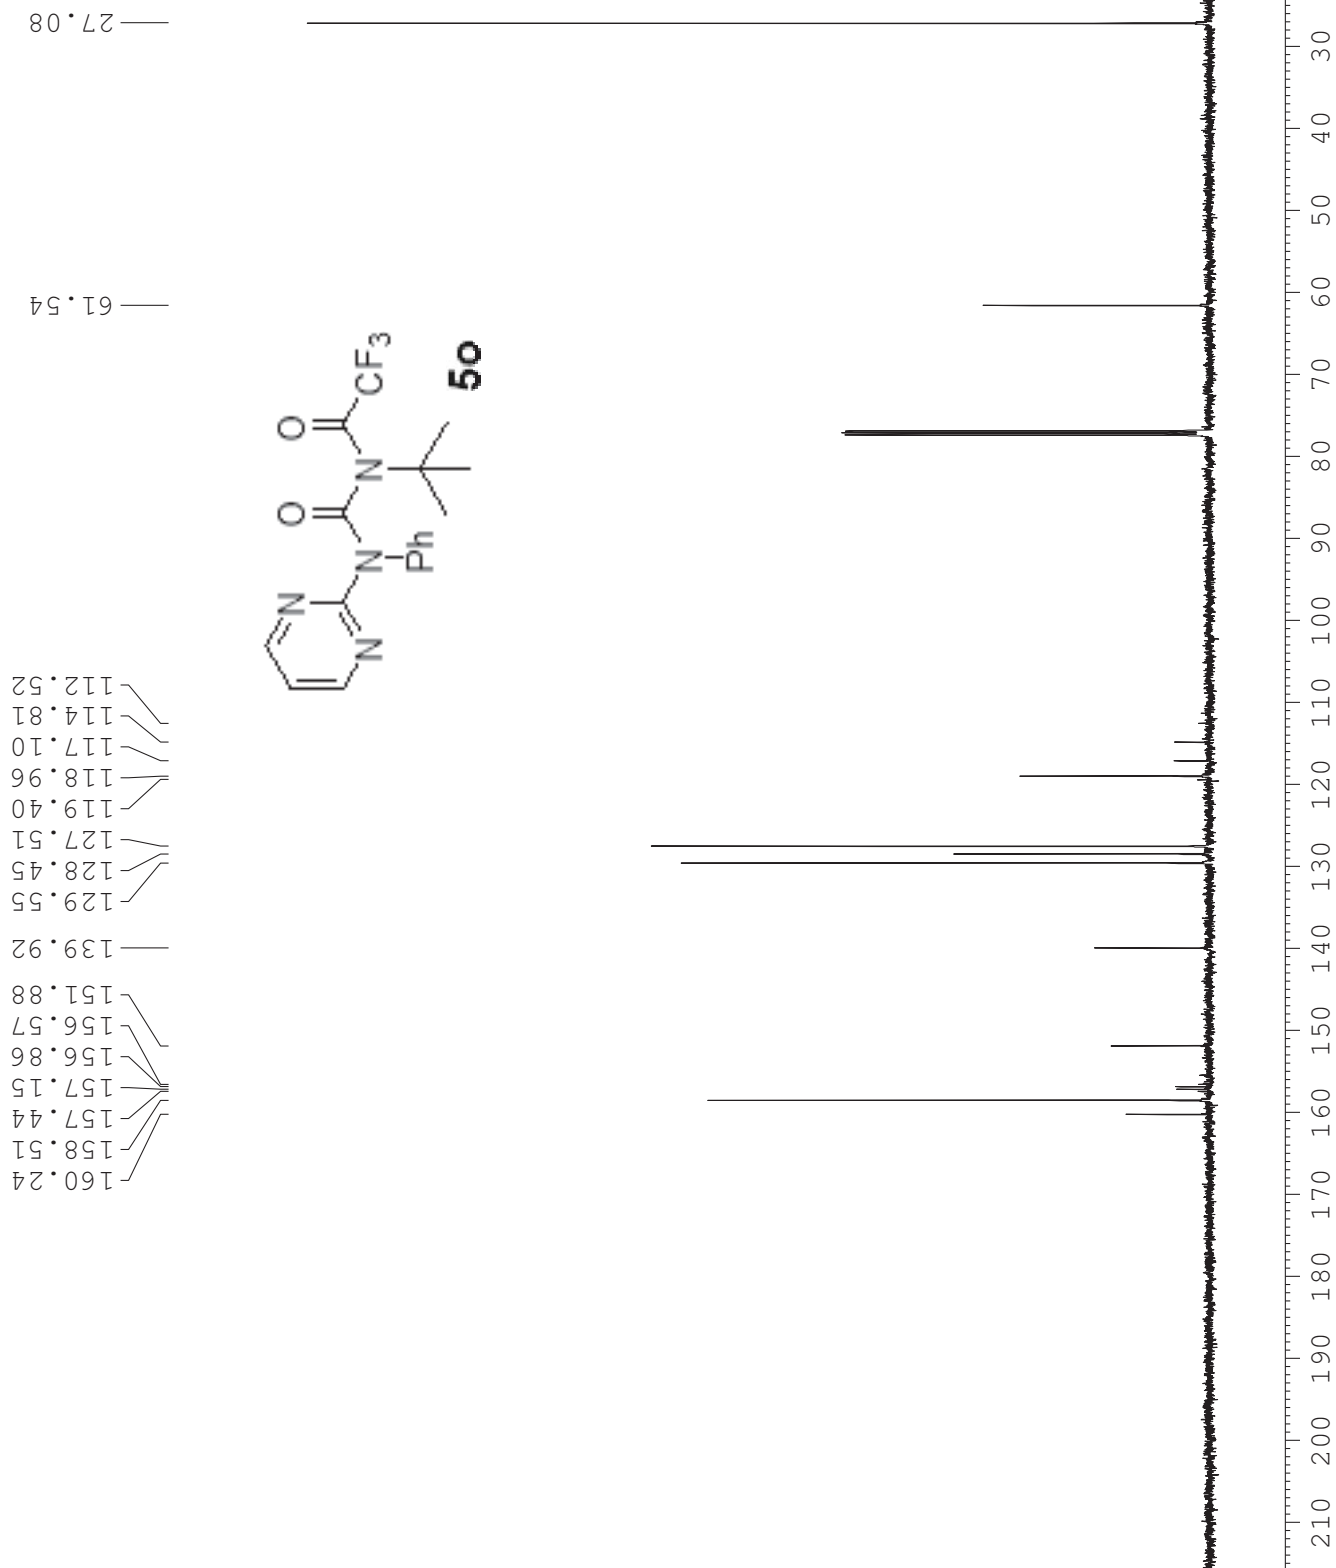

HXM-2-204  
PROTON CDCl3

Current Data Parameters  
NAME XB20120531  
EXPNO 5  
PROCNO 1

F2 - Acquisition Parameters  
Date\_ 20120531  
Time\_ 9.59  
INSTRUM spect  
PROBHD 5 mm PAIXO 19F  
PULPROG zg30  
TD 65536  
SOLVENT CDCl3  
NS 8  
DS 2  
SWH 10330.578 Hz  
FIDRES 0.157632 Hz  
AQ 3.1720407 sec  
RG 114  
DW 48.400 usec  
DE 6.00 usec  
TE 297.7 K  
D1 1.0000000 sec  
TD0 1

==== CHANNEL f1 =====  
NUC1 1H  
P1 13.72 usec  
PL1 1.00 dB  
SFO1 500.1330885 MHz

F2 - Processing parameters  
SI 32768  
SF 500.1300127 MHz  
WDW no  
SSB 0  
LB 0.00 Hz  
GB 0  
PC 1.00

1.357

2.353

7.446  
7.431  
7.416  
7.365  
7.363  
7.350  
7.335  
7.327  
7.324  
7.310

8.747

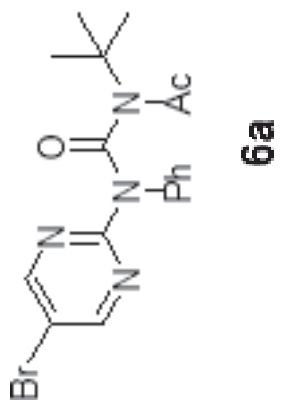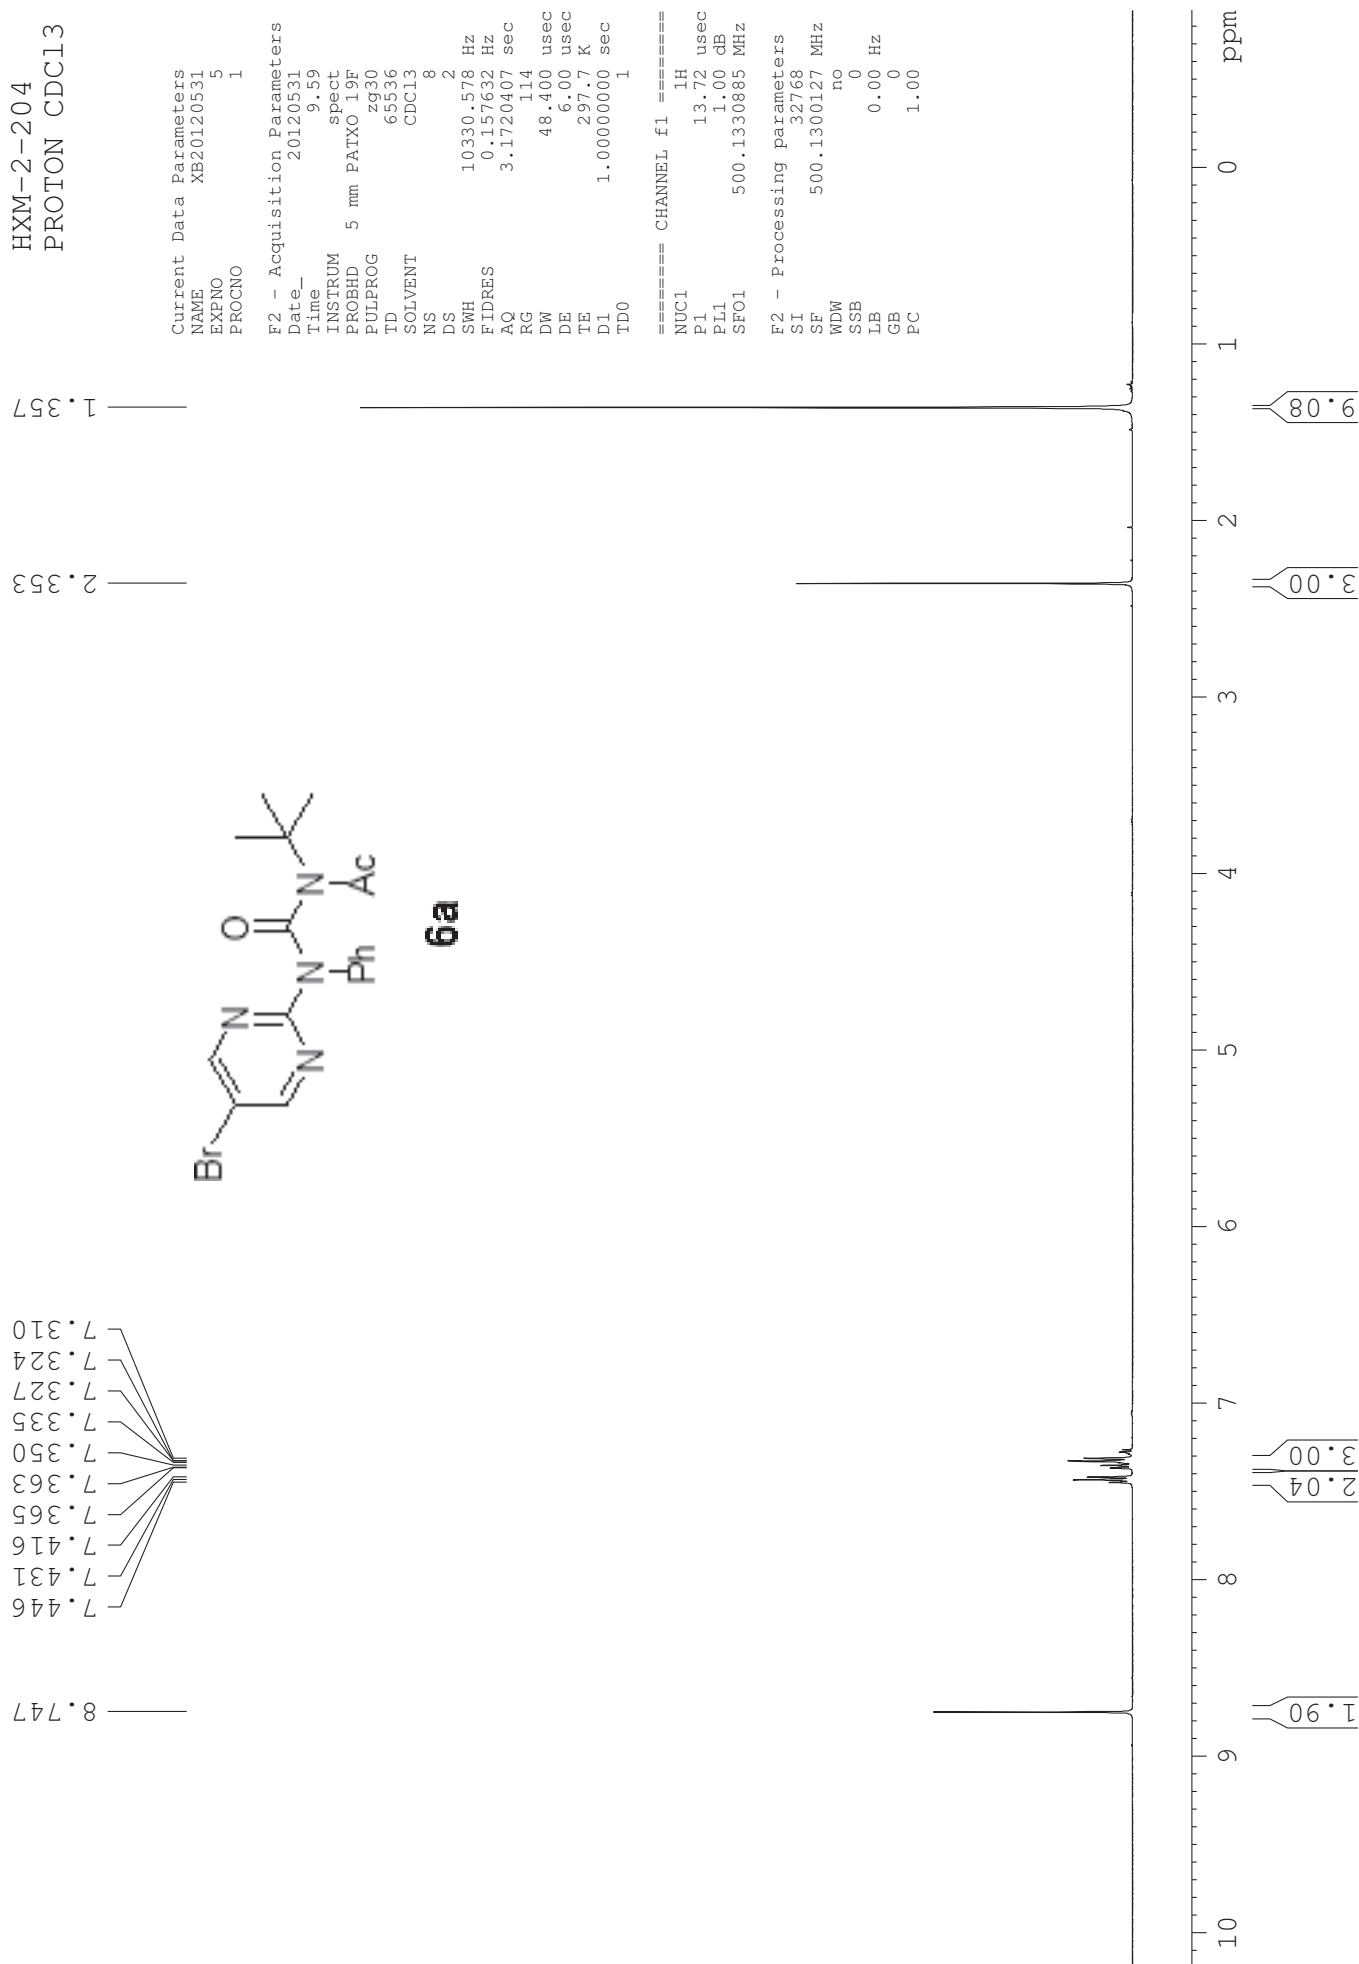

HXM-2-204  
C13CPD CDC13 I

Current Data Parameters  
NAME XB20120531  
EXPNO 7  
PROCNO 1

F2 - Acquisition Parameters  
Date\_ 20120531  
Time 10.10  
INSTRUM spect  
PROBHD 5 mm PATXO 19F  
PULPROG zgpg30  
TD 65536  
SOLVENT CDC13  
NS 128  
DS 4  
SWH 30030.029 Hz  
FIDRES 0.458222 Hz  
AQ 1.0912410 sec  
RG 228.1  
DW 16.650 usec  
DE 6.00 usec  
TE 298.8 K  
D1 2.00000000 sec  
d11 0.03000000 sec  
DELTA 1.89999998 sec  
TD0 1

==== CHANNEL f1 =====  
NUC1 13C  
P1 9.50 usec  
PL1 -0.50 dB  
SFO1 125.7703643 MHz

==== CHANNEL f2 =====  
CPDPRG2 waltz16  
NUC2 1H  
PCPD2 80.00 usec  
PL2 1.00 dB  
PL12 16.31 dB  
PL13 16.50 dB  
SFO2 500.1320005 MHz

F2 - Processing parameters  
SI 32768  
SF 125.7577890 MHz  
WDW EM  
SSB 0  
GB 0  
PC 1.40

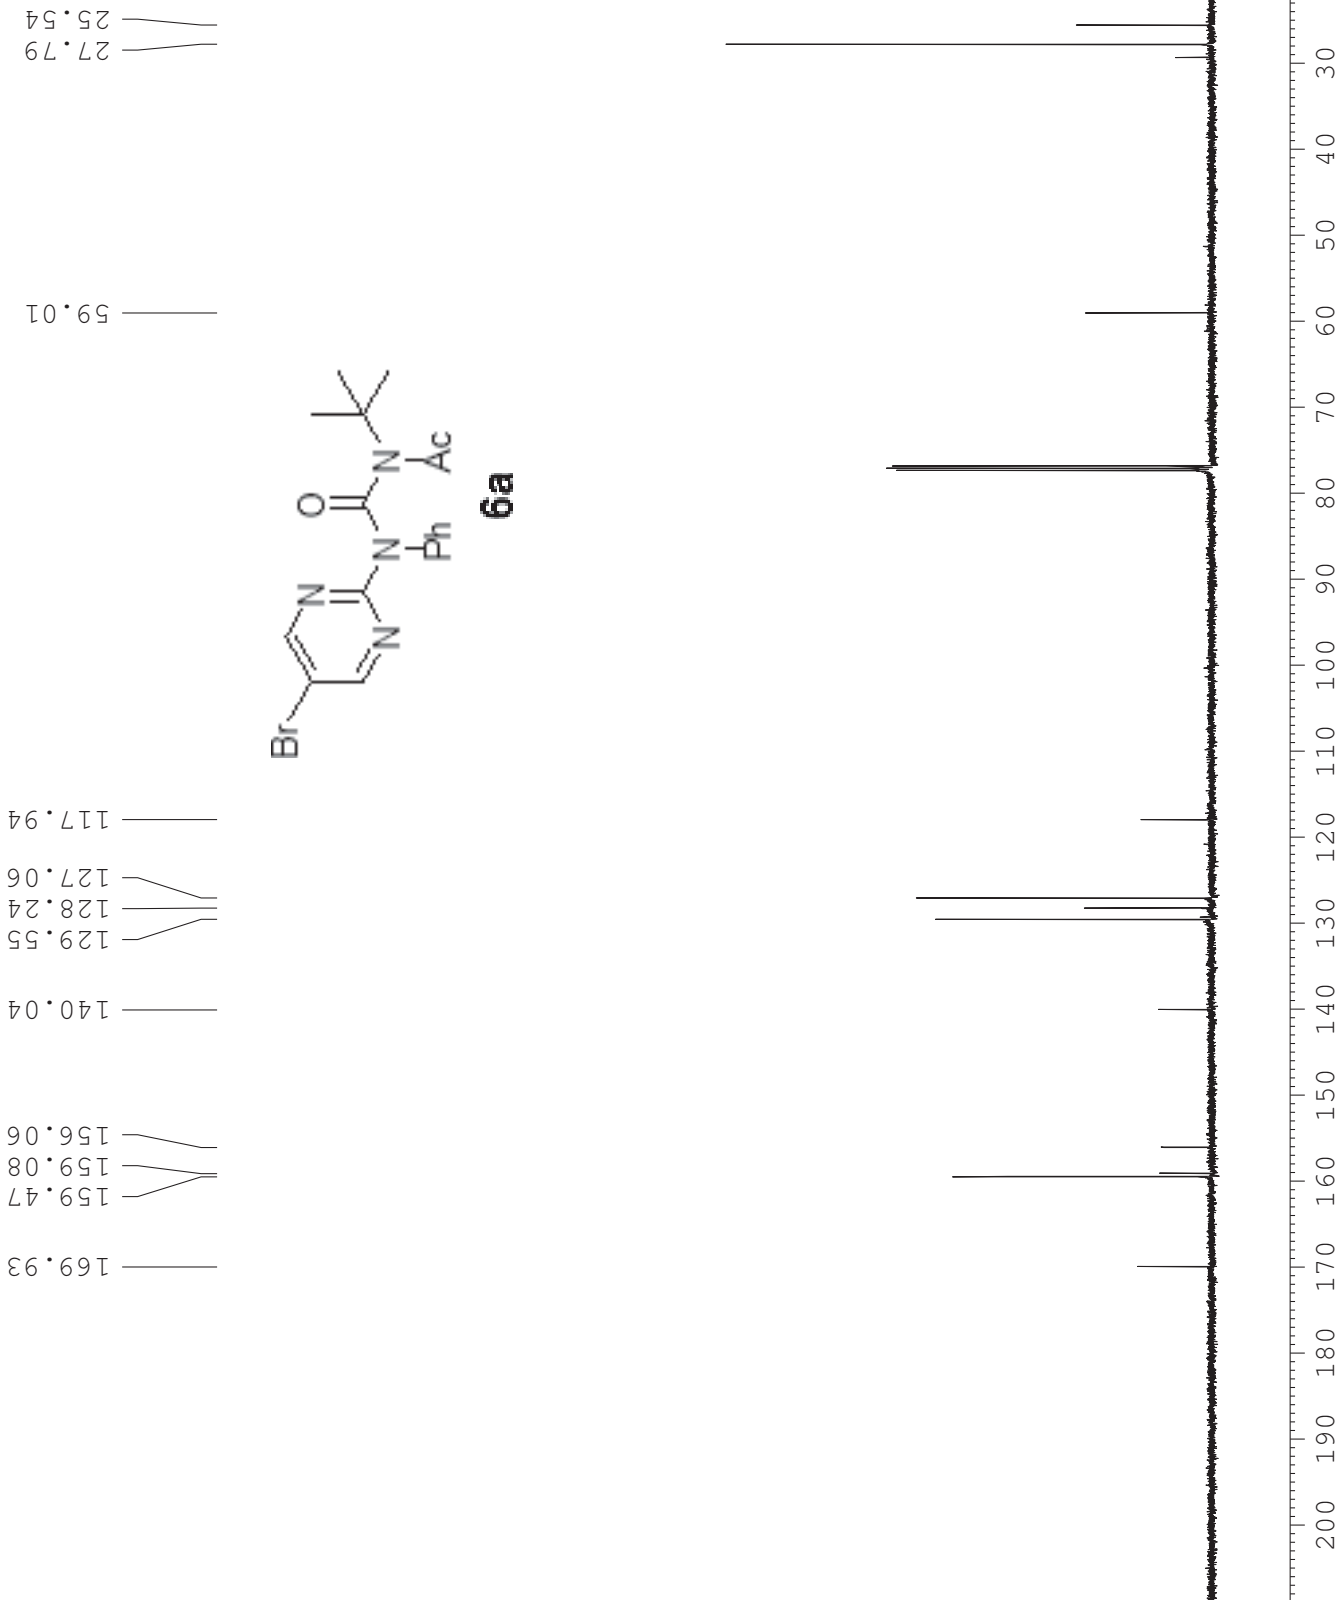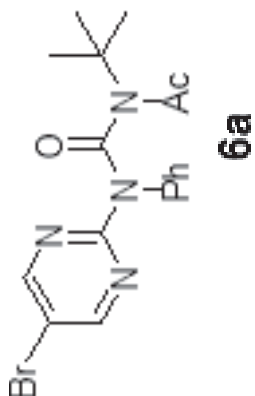

HXM-2-261  
 PROTON CDCl3

|         |                |
|---------|----------------|
| NAME    | XB20120410     |
| EXPNO   | 2              |
| PROCNO  | 1              |
| Date_   | 20120410       |
| Time    | 13.02          |
| INSTRUM | Spect          |
| PROBHD  | 5 mm PATXO 19F |
| PULPROG | zg30           |
| TD      | 65536          |
| SOLVENT | CDCl3          |
| NS      | 8              |
| DS      | 2              |
| SWH     | 10330.578 Hz   |
| FIDRES  | 0.157632 Hz    |
| AQ      | 3.1720407 sec  |
| RG      | 71.8           |
| DW      | 48.400 usec    |
| DE      | 6.00 usec      |
| TE      | 294.9 K        |
| D1      | 1.00000000 sec |
| TD0     | 1              |

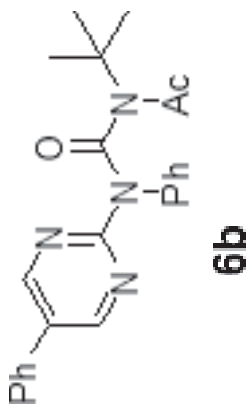

8.927  
 7.566  
 7.552  
 7.530  
 7.516  
 7.501  
 7.485  
 7.470  
 7.453  
 7.438  
 7.408  
 7.393  
 7.368  
 7.354  
 7.339

2.440  
 1.382

===== CHANNEL f1 =====  
 NUC1 1H  
 P1 13.70 usec  
 PL1 1.00 dB  
 SFO1 500.1330885 MHz  
 SI 32768  
 SF 500.1300129 MHz  
 WDW EM  
 SSB 0  
 LB 0.30 Hz  
 GB 0  
 PC 1.00

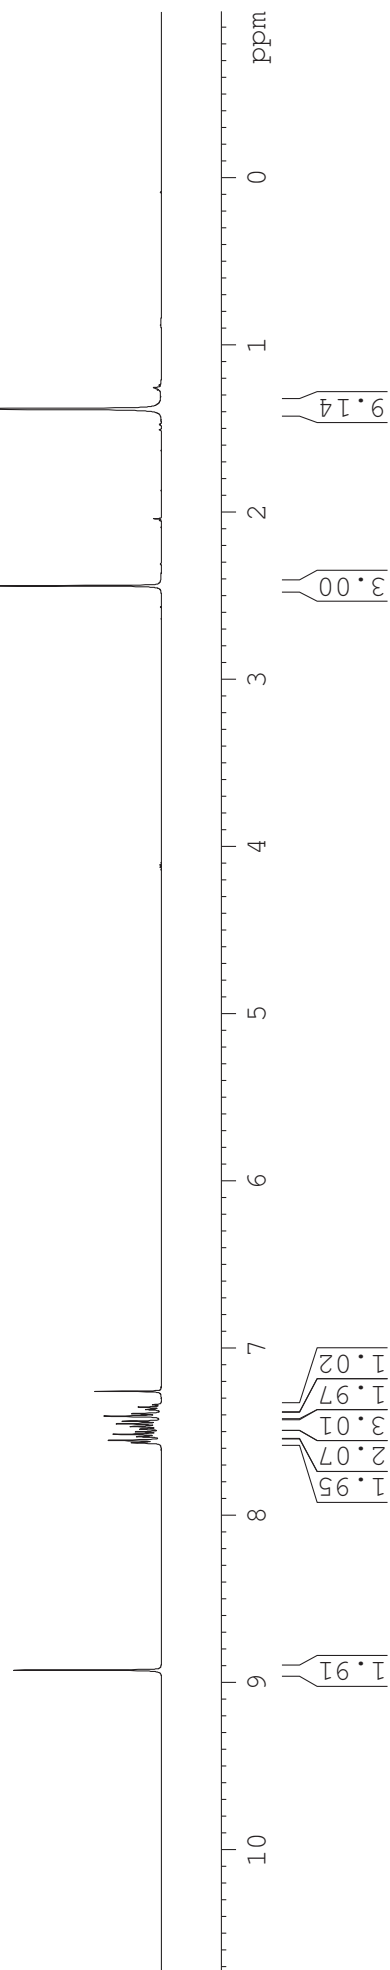

HXM-2-261  
C13CPD CDC13

27.75  
25.64

Current Data Parameters  
NAME XB20120410  
EXPNO 5  
PROCNO 1

F2 - Acquisition Parameters  
Date\_ 20120410  
Time 13.30  
INSTRUM spect  
PROBHD 5 mm PATXO 19F  
PULPROG zgpg30  
TD 65536  
SOLVENT CDC13  
NS 128  
DS 4  
SWH 30030.029 Hz  
FIDRES 0.458222 Hz  
AQ 1.0912410 sec  
RG 114  
DW 16.650 usec  
DE 6.00 usec  
TE 296.2 K  
D1 2.00000000 sec  
d11 0.03000000 sec  
DELTA 1.89999998 sec  
TD0 1

==== CHANNEL f1 =====  
NUC1 13C  
P1 9.50 usec  
PL1 -0.50 dB  
SFO1 125.7703643 MHz  
  
==== CHANNEL f2 =====  
CPDPRG2 waltz16  
NUC2 1H  
PCPD2 80.00 usec  
PL2 1.00 dB  
PL12 16.33 dB  
PL13 16.50 dB  
SFO2 500.1320005 MHz  
  
F2 - Processing parameters  
SI 32768  
SF 125.7577890 MHz  
WDW no  
SSB 0  
LB 0.00 Hz  
GB 0  
PC 1.40

58.87

170.12  
159.62  
156.63  
156.28  
140.38  
133.11  
132.31  
129.59  
129.50  
129.37  
128.03  
127.03  
126.92

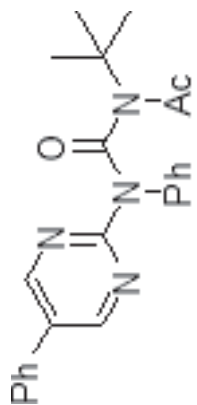

**6b**

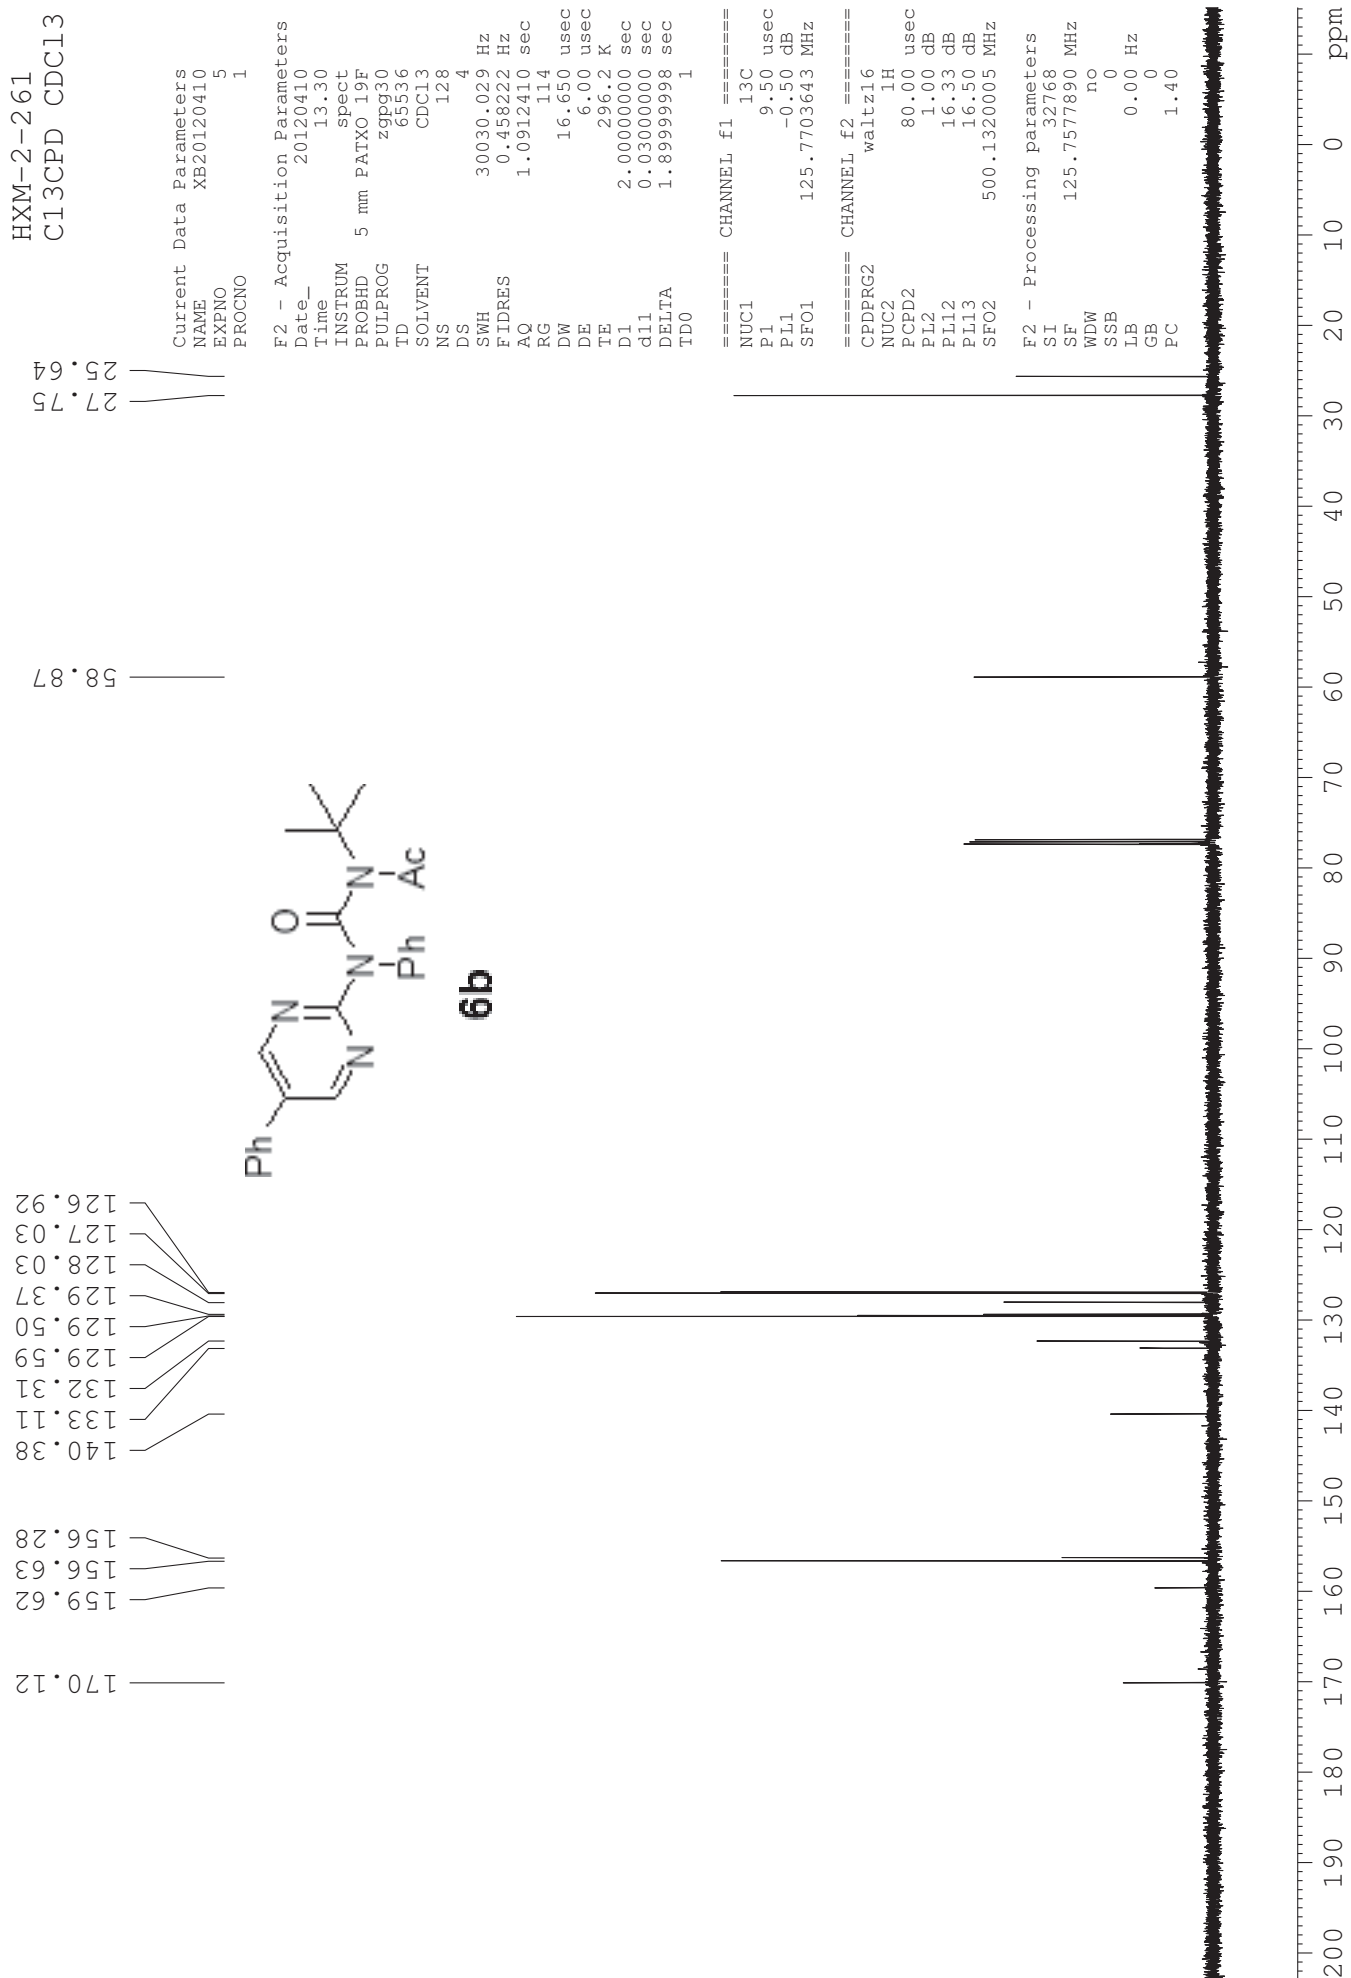

HXM-2-302  
PROTON CDCl3

Current Data Parameters  
NAME XB20120531  
EXPNO 8  
PROCNO 1

F2 - Acquisition Parameters  
Date\_ 20120531  
Time 10.16  
INSTRUM spect  
PROBHD 5 mm PAXO 19F  
PULPROG zg30  
TD 65536  
SOLVENT CDCl3  
NS 8  
DS 2  
SWH 10330.578 Hz  
FIDRES 0.157632 Hz  
AQ 3.1720407 sec  
RG 143.7  
DW 48.400 usec  
DE 6.00 usec  
TE 297.5 K  
D1 1.00000000 sec  
TD0 1

==== CHANNEL f1 =====  
NUC1 1H  
P1 13.72 usec  
PL1 1.00 dB  
SFO1 500.1330885 MHz

F2 - Processing parameters  
SI 32768  
SF 500.1300129 MHz  
WDW no  
SSB 0  
LB 0.00 Hz  
GB 0  
PC 1.00

8.573  
8.470  
7.451  
7.436  
7.420  
7.366  
7.352  
7.338  
7.310  
7.294

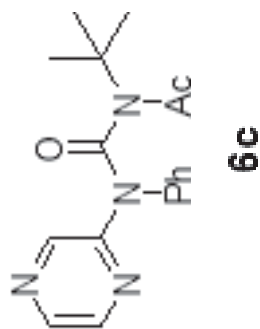

2.331  
1.314

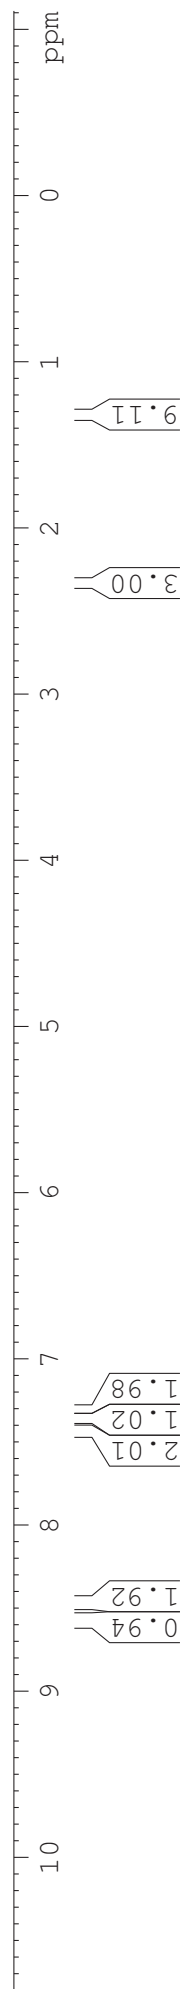



HXM-2-302  
C13CPD CDCl3

27.81  
25.56

58.92

169.56  
156.60  
143.17  
142.98  
142.53  
140.41  
129.76  
128.30  
127.20

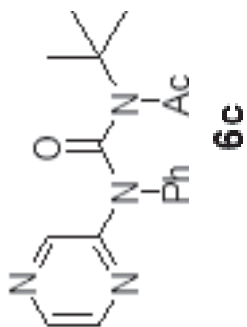

Current Data Parameters  
NAME XB20120531  
EXPNO 9  
PROCNO 1

F2 - Acquisition Parameters  
Date\_ 20120531  
Time 10.24  
INSTRUM spect  
PROBHD 5 mm PATXO 19F  
PULPROG zgpg30  
TD 65536  
SOLVENT CDCl3  
NS 128  
DS 4  
SWH 30030.029 Hz  
FIDRES 0.458222 Hz  
AQ 1.0912410 sec  
RG 128  
DW 16.650 usec  
DE 6.00 usec  
TE 298.4 K  
D1 2.00000000 sec  
d11 0.03000000 sec  
DELTA 1.89999998 sec  
TD0 1

==== CHANNEL f1 =====  
NUC1 13C  
P1 9.50 usec  
PL1 -0.50 dB  
SFO1 125.7703643 MHz

==== CHANNEL f2 =====  
CPDPRG2 waltz16  
NUC2 1H  
PCPD2 80.00 usec  
PL2 1.00 dB  
PL12 16.31 dB  
PL13 16.50 dB  
SFO2 500.1320005 MHz

F2 - Processing parameters  
SI 32768  
SF 125.7577890 MHz  
WDW no  
GB 0  
PC 1.40

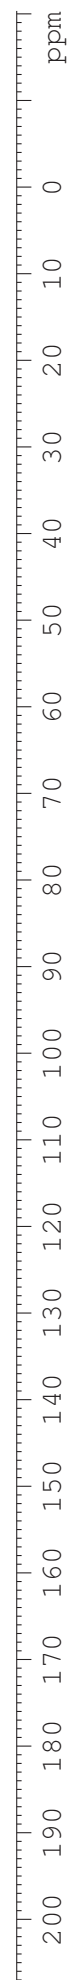

HXM-2-188  
 PROTON CDC13

```

NAME      XB20120227
EXPNO     2
PROCNO    1
Date_     20120227
Time      10.35
INSTRUM   spect
PROBHD    5 mm PAXO 19F
PULPROG   zg30
TD         65536
SOLVENT   CDC13
NS         16
DS         2
SWH        10330.578 Hz
FIDRES     0.157632 Hz
AQ         3.1720407 sec
RG         322.5
DW         48.400 usec
DE         6.00 usec
TE         293.6 K
D1         1.00000000 sec
TD0        1

===== CHANNEL f1 =====
NUC1       1H
P1         13.70 usec
PL1        1.00 dB
SFO1       500.1330885 MHz
SI         32768
SF         500.1300132 MHz
WDW        EM
SSB        0
LB         0.30 Hz
GB         0
PC         1.00
    
```

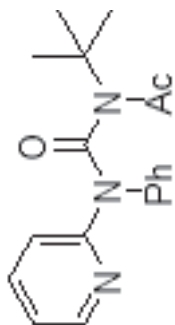

**6d**

7.164  
 7.180  
 7.210  
 7.220  
 7.225  
 7.234  
 7.289  
 7.304  
 7.308  
 7.321  
 7.325  
 7.390  
 7.405  
 7.421  
 7.706  
 7.709  
 7.721  
 7.724  
 7.737  
 7.740  
 8.513  
 8.514  
 8.521  
 8.522  
 8.524

1.311  
 2.370

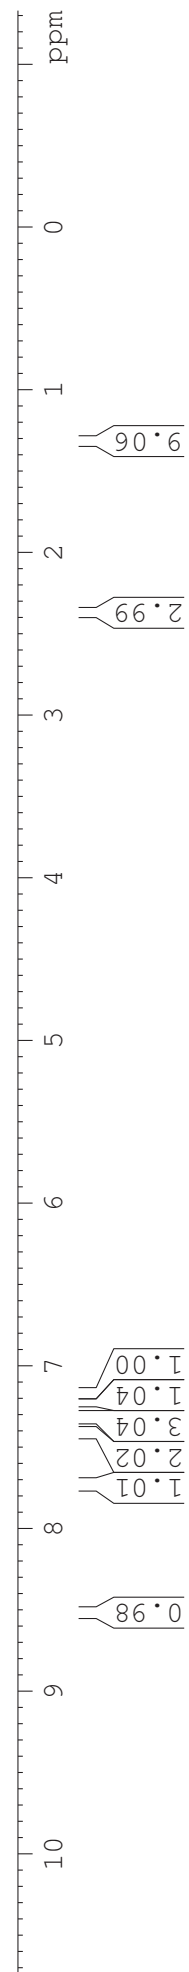

HXM-2-188  
C13CPD CDCl3

27.68  
25.66

Current Data Parameters  
NAME XB20120228  
EXPNO 21  
PROCNO 1

F2 - Acquisition Parameters  
Date\_ 20120228  
Time 20.23  
INSTRUM spect  
PROBHD 5 mm PATXO 19F  
PULPROG zgpg30  
TD 65536  
SOLVENT CDCl3  
NS 128  
DS 4  
SWH 30030.029 Hz  
FIDRES 0.458222 Hz  
AQ 1.0912410 sec  
RG 114  
DW 16.650 usec  
DE 6.00 usec  
TE 295.5 K  
d1 2.00000000 sec  
d11 0.03000000 sec  
DELTA 1.89999998 sec  
TD0 1

==== CHANNEL f1 =====  
NUC1 13C  
P1 9.50 usec  
PL1 -0.50 dB  
SFO1 125.7703643 MHz  
  
==== CHANNEL f2 =====  
CPDPRG2 waltz16  
NUC2 1H  
PCPD2 80.00 usec  
PL2 1.00 dB  
PL12 16.33 dB  
PL13 16.50 dB  
SFO2 500.1320005 MHz  
  
F2 - Processing parameters  
SI 32768  
SF 125.7577890 MHz  
WDW EM  
SSB 0  
LB 1.00 Hz  
GB 0  
PC 1.40

58.63

169.79  
156.52  
154.90  
149.29  
141.40  
138.34  
129.45  
127.62  
126.88  
122.60  
121.62

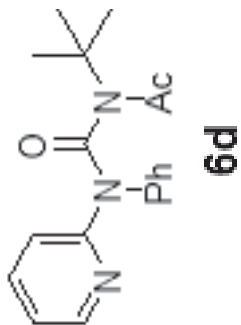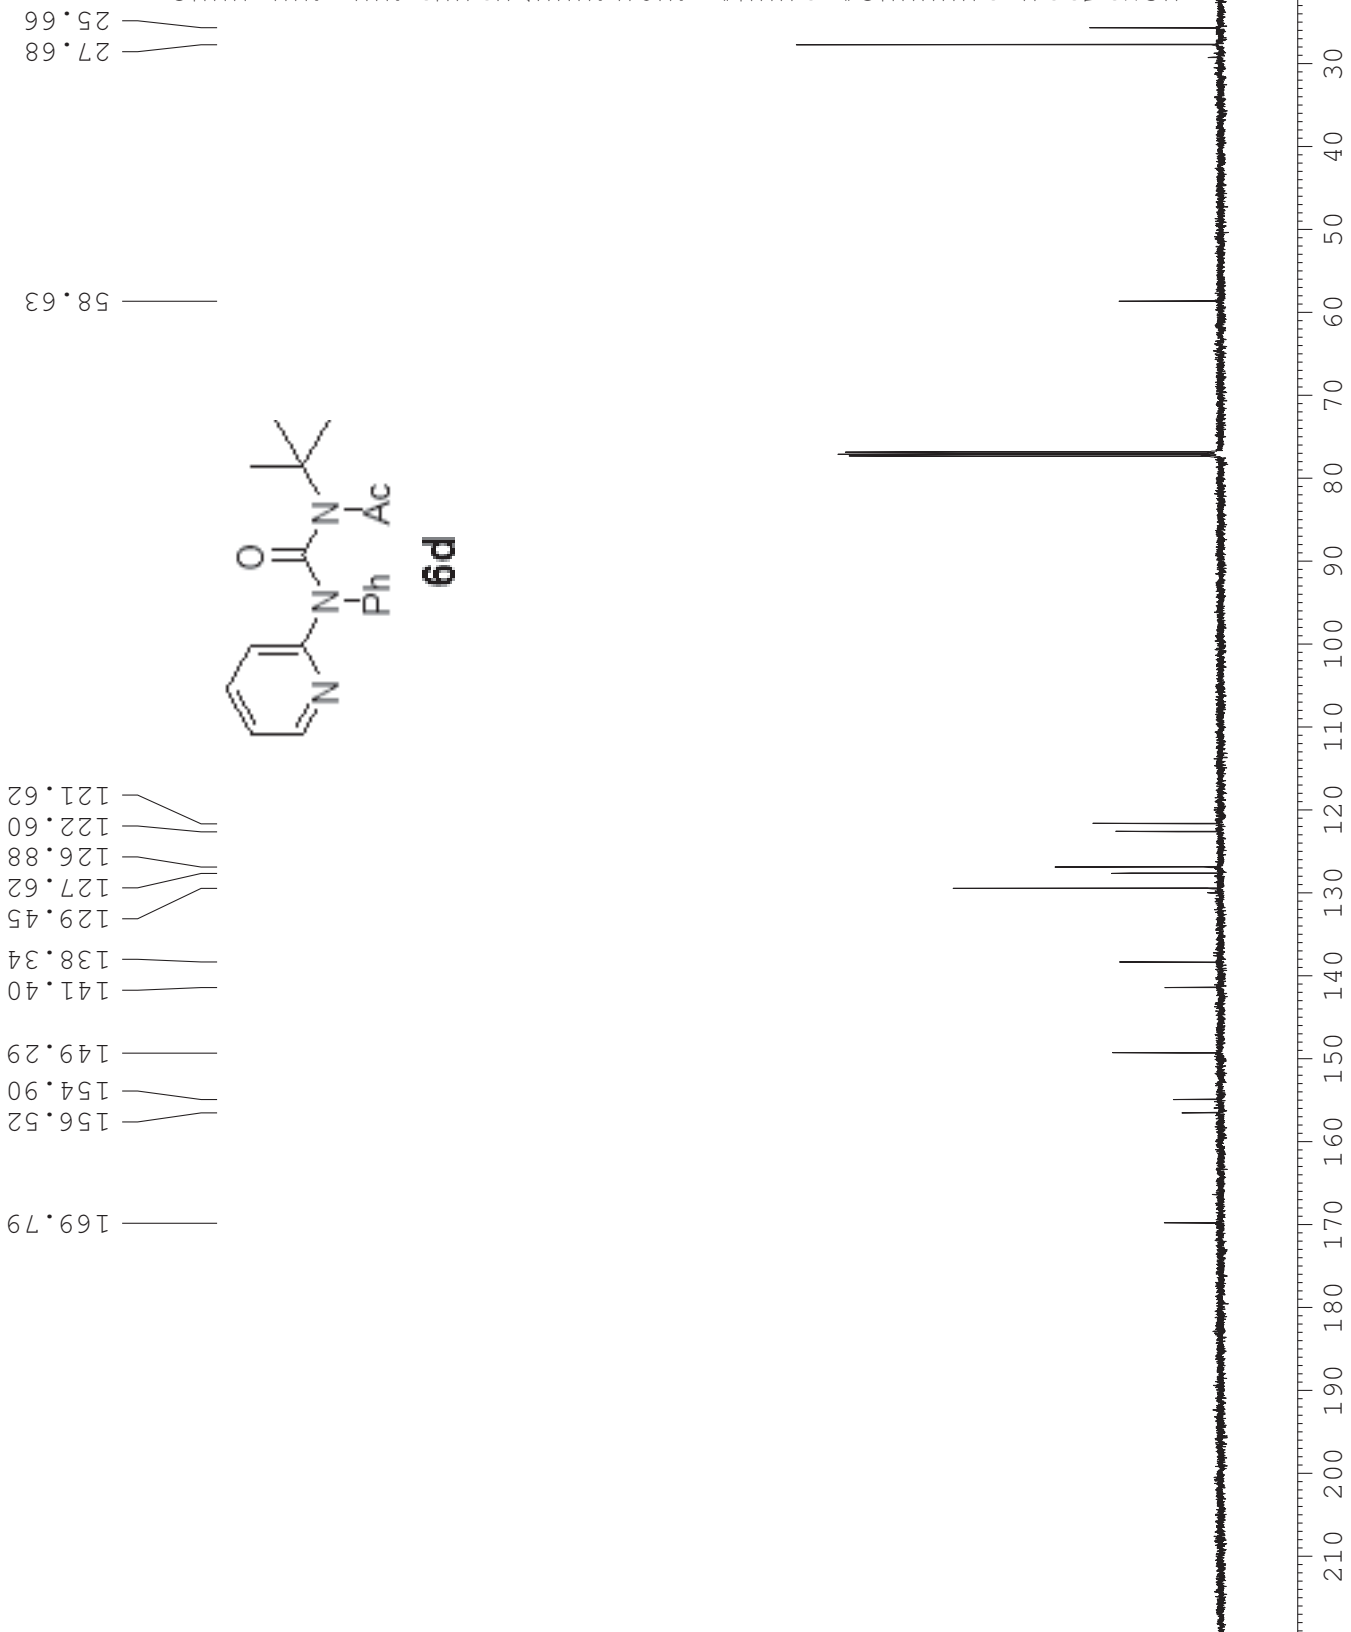

HXM-2-236  
PROTON CDC13

9.278  
8.100  
8.096  
8.002  
7.998  
7.984  
7.980  
7.866  
7.848  
7.847  
7.443  
7.430  
7.416  
7.404  
7.401  
7.387  
7.352  
7.349  
7.346  
7.337  
7.335  
7.324  
7.321

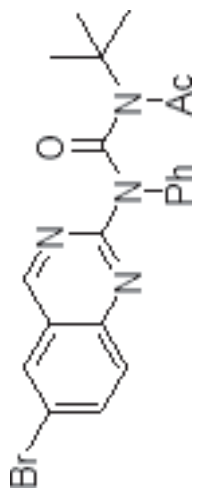

2.466  
1.312

NAME XB20120328  
EXPNO 6  
PROCNO 1  
Date\_ 20120328  
Time 14.42  
INSTRUM spect  
PROBHD 5 mm PATXO 19F  
PULPROG zg30  
TD 65536  
SOLVENT CDC13  
NS 8  
DS 2  
SWH 10330.578 Hz  
FIDRES 0.157632 Hz  
AQ 3.1720407 sec  
RG 101.6  
DW 48.400 usec  
DE 6.00 usec  
TE 294.5 K  
D1 1.00000000 sec  
TD0 1

==== CHANNEL f1 =====  
NUC1 1H  
P1 13.70 usec  
PL1 1.00 dB  
SFO1 500.1330885 MHz  
SI 32768  
SF 500.1300129 MHz  
WDW no  
SSB 0  
LB 0.00 Hz  
GB 0  
PC 1.00

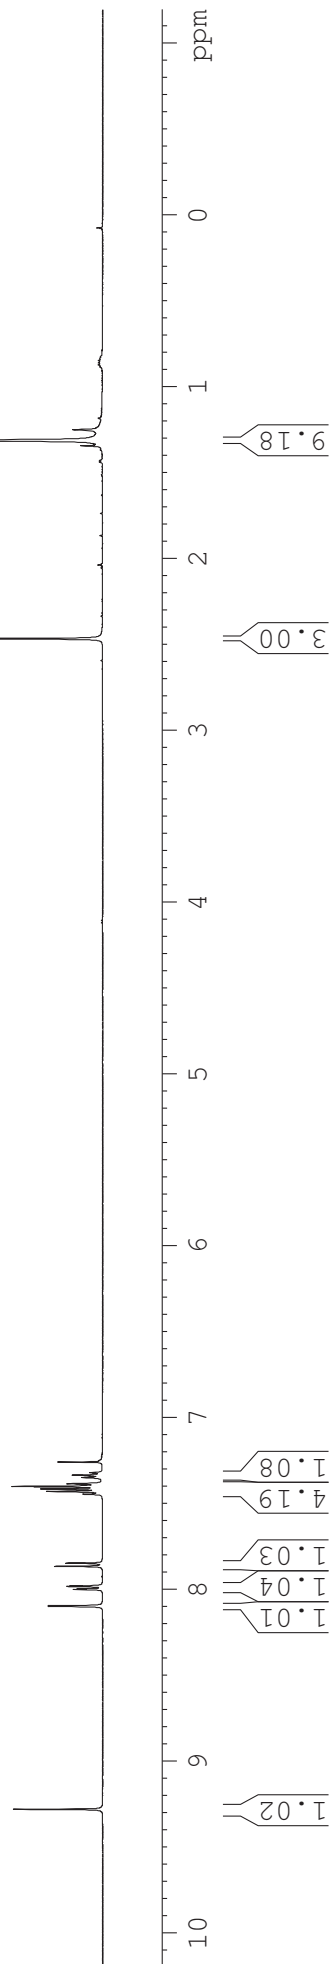

HXM-2-236  
 C13CPD CDC13

NAME XB20120328  
 EXPNO 8  
 PROCNO 1  
 Date\_ 20120328  
 Time 14.52  
 INSTRUM spect  
 PROBHD 5 mm FATXO 19F  
 PULPROG zgpg30  
 ID 65536  
 SOLVENT CDC13  
 NS 128  
 DS 4  
 SMH 30030.029 Hz  
 FIDRES 0.458222 Hz  
 AQ 1.0912410 sec  
 RG 322.5  
 DW 16.650 usec  
 DE 6.00 usec  
 TE 295.8 K  
 D1 2.00000000 sec  
 d11 0.03000000 sec  
 DELTA 1.89999998 sec  
 TD0 1

27.79  
 25.76

58.84

170.00  
 161.40  
 157.05  
 156.34  
 149.65  
 140.33  
 138.71  
 129.93  
 129.44  
 129.27  
 127.98  
 127.07  
 123.84  
 122.25

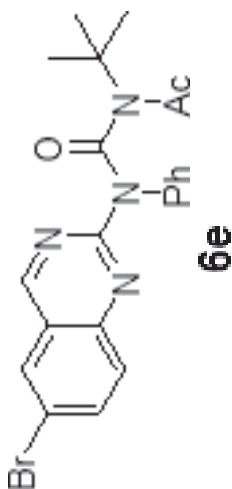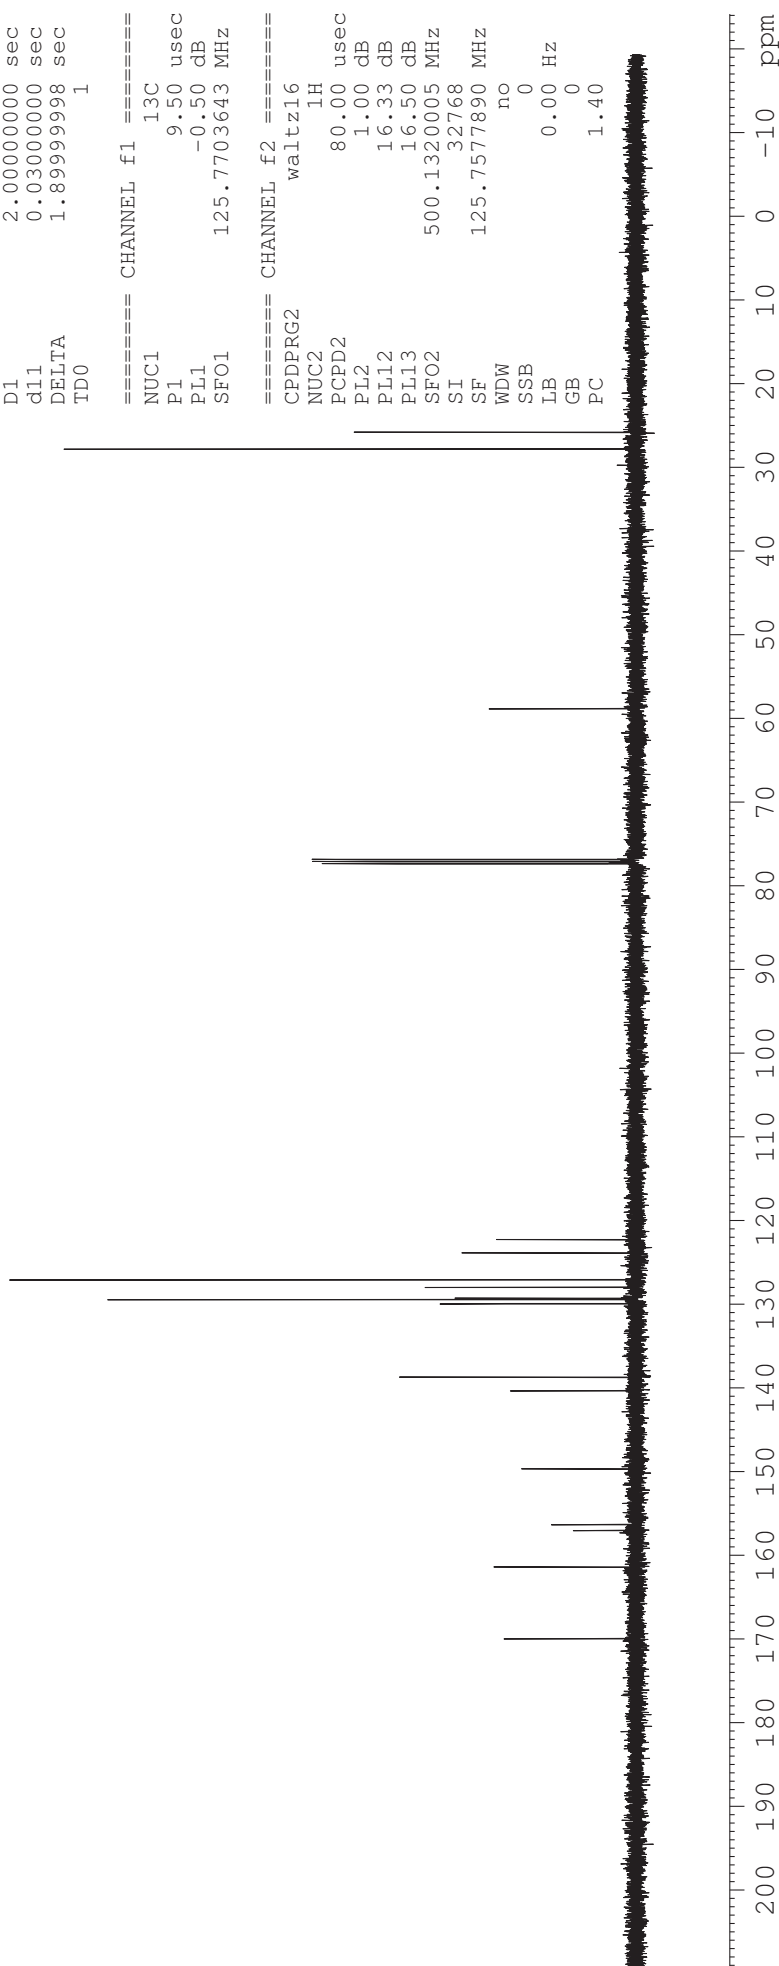



HXM-2-298  
 C13CPD CDC13

NAME xb20120514  
 EXPNO 9  
 PROCNO 1  
 Date\_ 20120514  
 Time\_ 16.51  
 INSTRUM spect  
 PROBD 5 mm PATXO 19F  
 PULPROG zgpg30  
 TD 65536  
 SOLVENT CDC13  
 NS 39  
 DS 4  
 SWH 30030.029 Hz  
 FIDRES 0.458222 Hz  
 AQ 1.0912410 sec  
 RG 101.6  
 DW 16.650 usec  
 DE 6.00 usec  
 TE 295.6 K  
 D1 2.00000000 sec  
 d11 0.03000000 sec  
 DELTA 1.89999998 sec  
 TD0 1

==== CHANNEL f1 =====  
 NUC1 13C  
 P1 9.50 usec  
 PL1 -0.50 dB  
 SFO1 125.7703643 MHz  
 ===== CHANNEL f2 =====  
 CPDPRG2 waltz16  
 NUC2 1H  
 PCPD2 80.00 usec  
 PL2 1.00 dB  
 PL12 16.31 dB  
 PL13 16.50 dB  
 SFO2 500.1320005 MHz  
 SI 32768  
 SF 125.7577890 MHz  
 WDW EM  
 SSB 0  
 LB 1.00 Hz  
 GB 0  
 PC 1.40

27.85  
 25.87

58.64

169.73  
 156.63  
 153.12  
 146.89  
 141.01  
 138.69  
 130.52  
 129.52  
 129.19  
 127.75  
 127.40  
 127.36  
 127.01  
 126.64  
 119.13

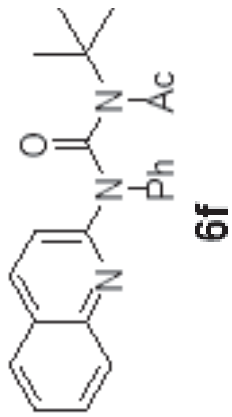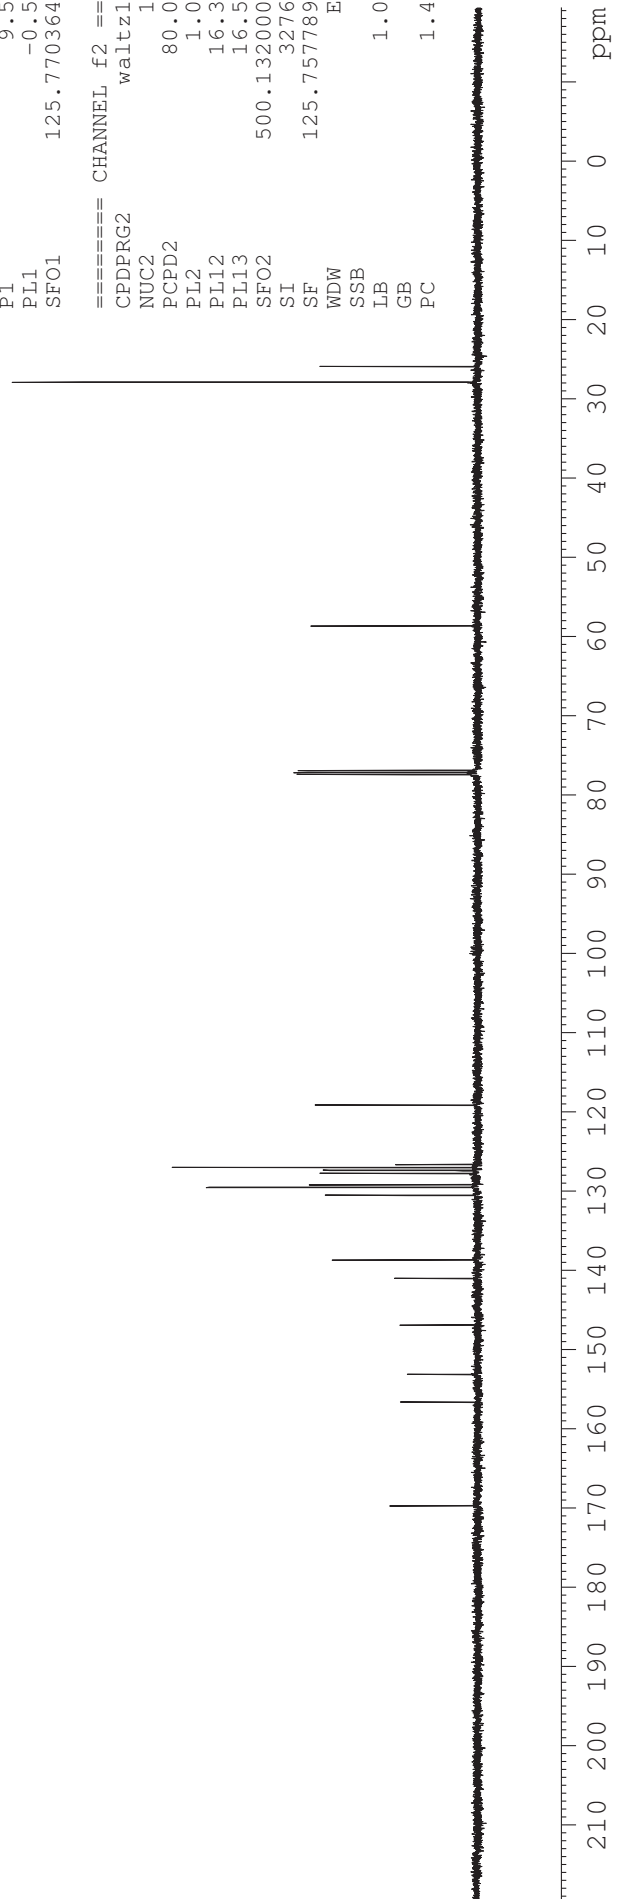

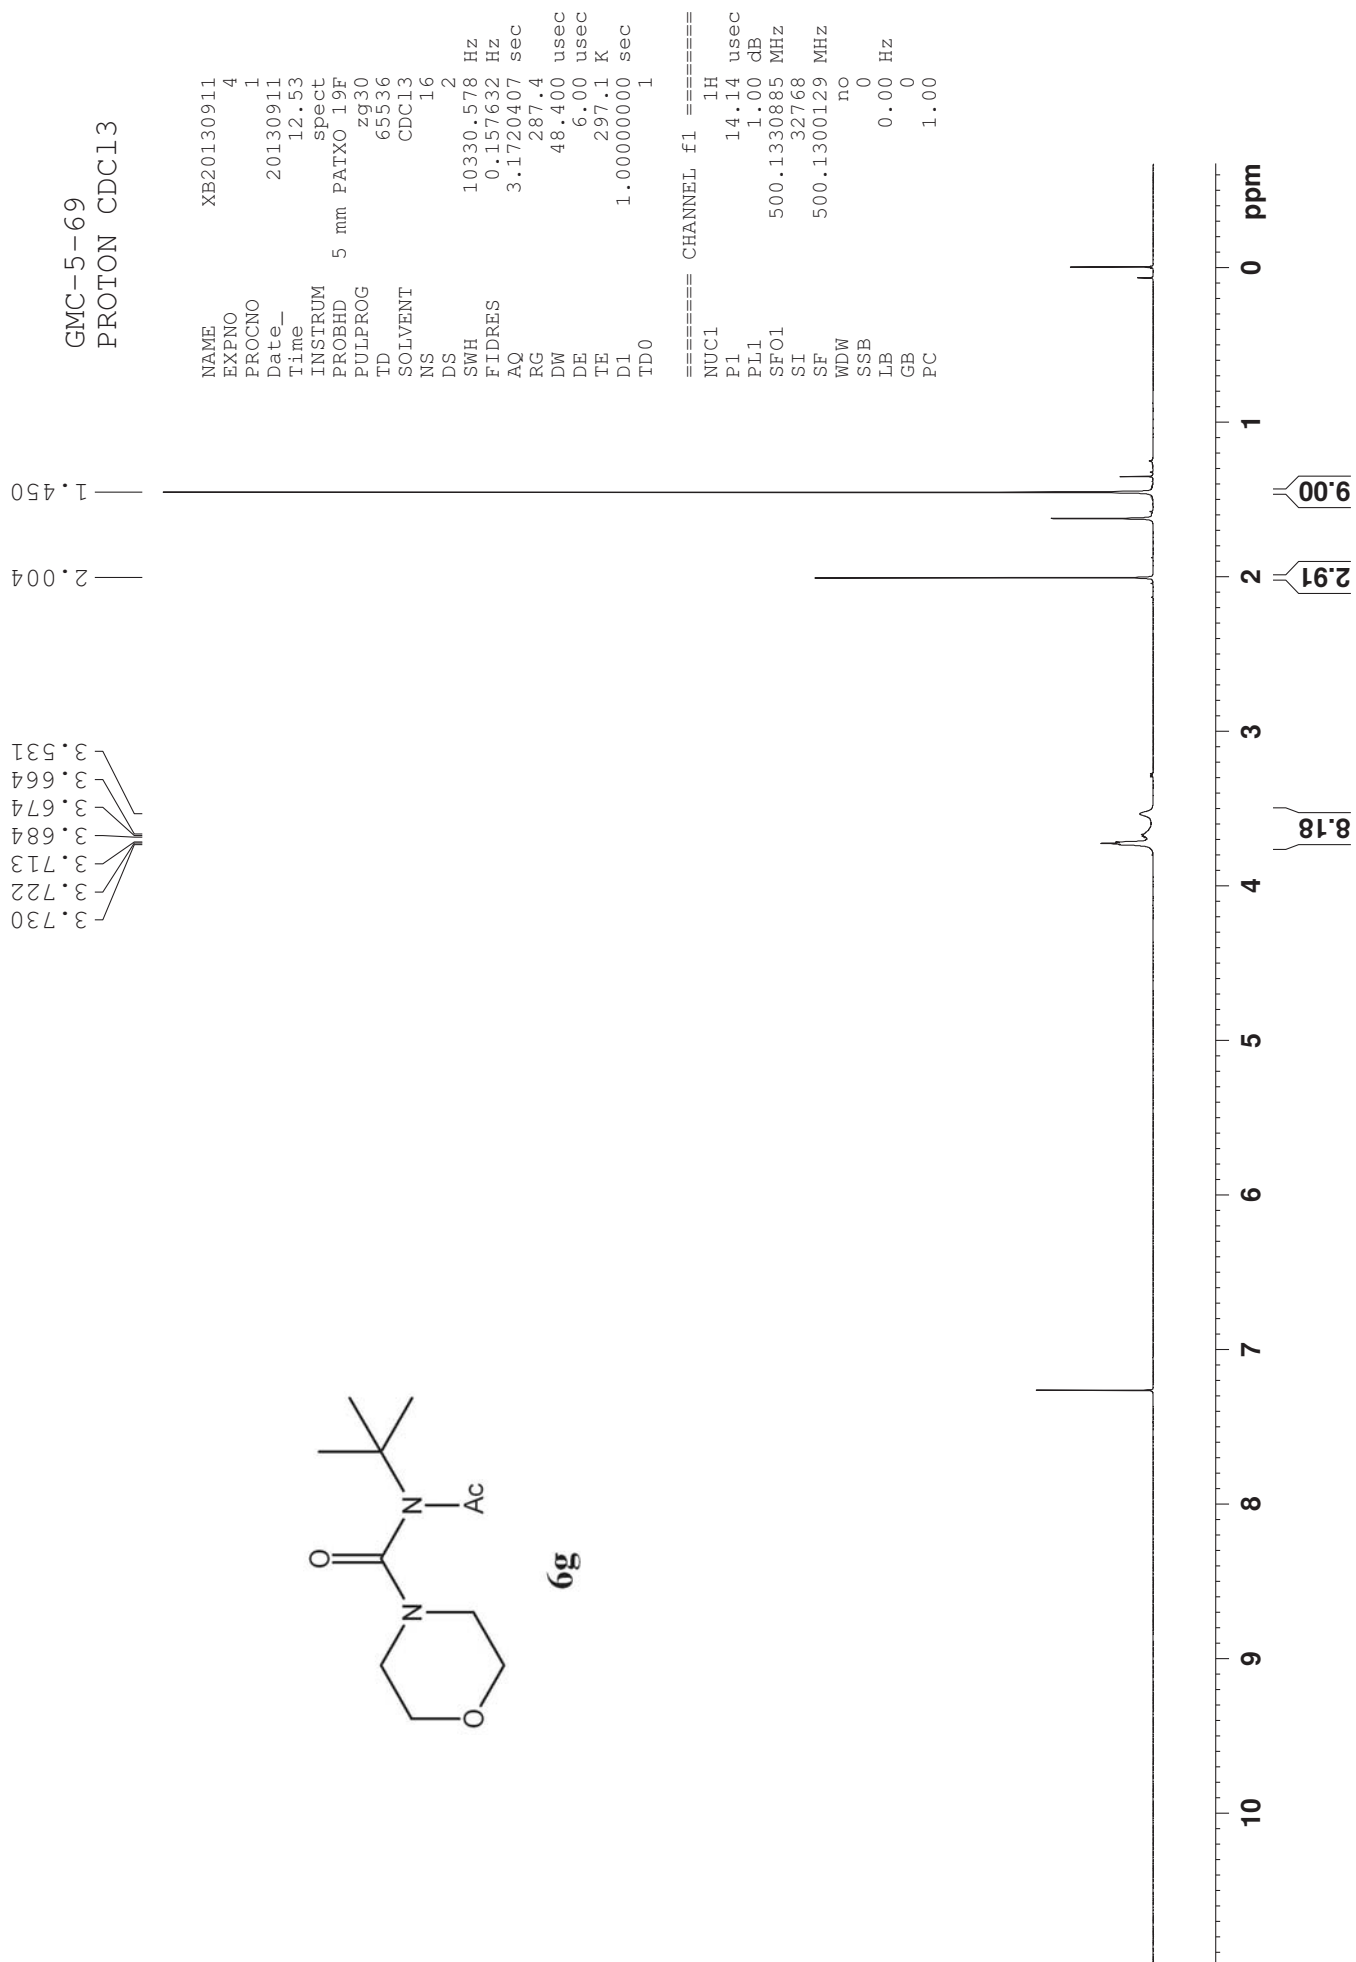



GMC-5-69  
 C13CPD CDCl3

```

NAME      XB20130912
EXPNO    2
PROCNO   1
Date_    20130912
Time     9.53
INSTRUM  spect
PROBHD   5 mm PAXO 19F
PULPROG  zgpg30
TD       65536
SOLVENT  CDCl3
NS       1024
DS       4
SWH      30030.029 Hz
FIDRES   0.458222 Hz
AQ       1.0912410 sec
RG       362
DW       16.650 usec
DE       6.00 usec
TE       298.1 K
D1       2.00000000 sec
d11      0.03000000 sec
DELTA    1.89999998 sec
TD0      1
===== CHANNEL f1 =====
NUC1     13C
P1       9.50 usec
PL1      -0.50 dB
SFO1     125.7703643 MHz
===== CHANNEL f2 =====
CPDPRG2  waltz16
NUC2     1H
PCPD2    80.00 usec
PL2      1.00 dB
PLI2     16.05 dB
PLI3     16.50 dB
SFO2     500.1320005 MHz
SI       32768
SF       125.7577709 MHz
WDW      EM
SSB      0
LB       1.00 Hz
GB       0
PC       0.20
    
```

23.98  
 28.10  
 43.79  
 47.12  
 57.88  
 66.40  
 66.68

156.32  
 168.65

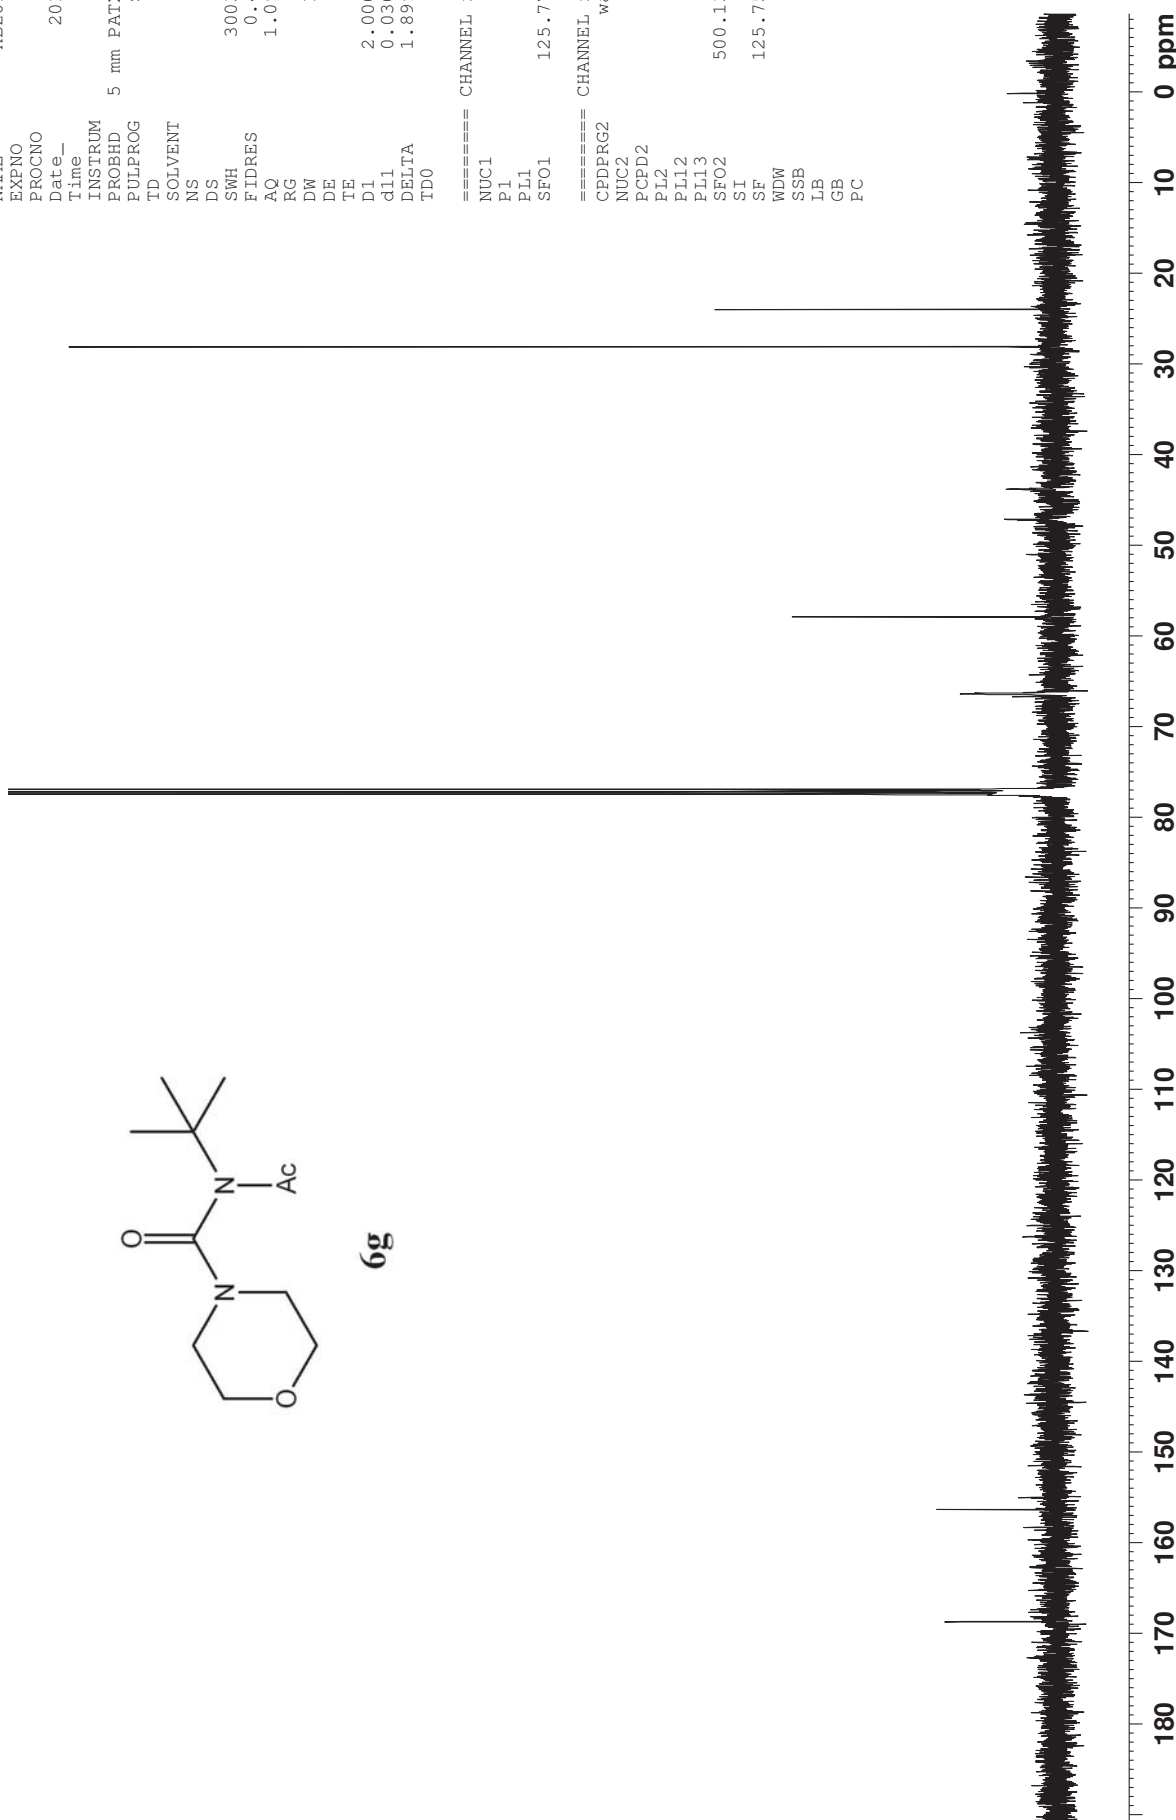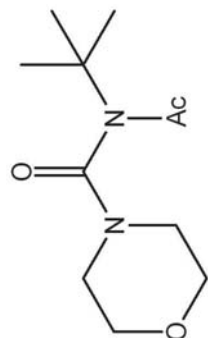

6g
